# Supplementary material for: Isoform-resolved spatial transcriptomics on a lab-made high-density array via a single-chip NGS-TGS workflow
Source: bioRxiv preprint, doi:10.64898/2026.03.15.711944, version 1 (2026-03-18)
Supplement: Supplementary Tables, and will be used for the link to the file on the preprint site. [file 711944_file02.xlsx]

## Sheet: Supplementary Data 1
Supplementary Data 1. Spatial barcodes sequence and chip decoding codebook, related to Fig. 1.
Barcode ID	sequence	cycle 1-6 code	Barcode ID	sequence	cycle 7-12 code	Barcode ID	sequence	cycle 13-18code
bc1-1	GCCATAGGAGAGCTAAA	220000	bc2-1	CTAGGCTGGCTGTGAAGAA	220000	bc3-1	CGAAGGACTTCGACGTCAA	220000
bc1-2	CGATATCCTTGAGCTCG	220001	bc2-2	TTACTGCAGGTCACCTATA	220001	bc3-2	GTCGGGTAGCATGTACCTC	220001
bc1-3	CGTAAGGTCCTTACGCC	220010	bc2-3	TTTGGTAGCACGTATATGG	220010	bc3-3	GCCACACTGACACATGCAT	220010
bc1-4	ACCAGATTTGTAAGCGA	220011	bc2-4	CTCAACCCGCAAGTATGTG	220011	bc3-4	CTAGGGTTACCTCATAATG	220011
bc1-5	TGGAGCGGCCGATGTAT	220100	bc2-5	GGTGATGTCCACGTAAGTT	220100	bc3-5	ATGAGGGTCATCAGATGCC	220100
bc1-6	AGGACCTGCCCATTATC	220101	bc2-6	AGAACTTAGTACGCACCAC	220101	bc3-6	CAGGTAGCGCAATACGTTG	220101
bc1-7	GATCATCTGGTGATCCG	220110	bc2-7	TGTTATTCGCCGCACGTAT	220110	bc3-7	TAGTTGCGTGCTAAACGTT	220110
bc1-8	CCGATGCAGAGGTTACT	220111	bc2-8	CGCATCTCTTGTTGCAGCC	220111	bc3-8	TTTAAACGGGAGCTTCCTG	220111
bc1-9	CCTTATGAACGTGGGAG	221000	bc2-9	TCAAAGTACCGAACGTACG	221000	bc3-9	TGGCTGCACAGATCCTTAC	221000
bc1-10	GCATGAAAGTACGGTCC	221001	bc2-10	TCGCTGTCACGTCCAACAG	221001	bc3-10	GGTGTCCACGCATAAGCGA	221001
bc1-11	ACGCGTACATACATAGC	221010	bc2-11	TCACGAGCAGCATGCTAGC	221010	bc3-11	AGGTCAGGAAGCAGCTACA	221010
bc1-12	CTGTTGATTACCCGTGC	221011	bc2-12	CTGAGATTTGTCTCAGGTC	221011	bc3-12	CAGGGCTTGGCGTATTACC	221011
bc1-13	ACTGGTCCCGCGTGTTA	221100	bc2-13	TGACTTCGCTAGAGATGTC	221100	bc3-13	TCATTTCCGGTCATGTACC	221100
bc1-14	TTTGGACGGCTTCAGTT	221101	bc2-14	ACGCGGATCTCTGGACATA	221101	bc3-14	TAGATACTCACCATCGGCA	221101
bc1-15	TTCTTGATTGGCCACAT	221110	bc2-15	TTTGTCGTACTCACAAGCC	221110	bc3-15	TCTCTAGTCTGGAGAACAA	221110
bc1-16	GCTCCATATAGCGGTAT	221111	bc2-16	TGAACACCCAGTGGGCACA	221111	bc3-16	GGAGGGCATTTGACCTGAT	221111
bc1-17	GCACTTCCTTAATCCCG	202000	bc2-17	GGCCCTCTATACTCAAGAC	202000	bc3-17	ATACGTCCCGGAGTATGTC	202000
bc1-18	TAGAAACCGTGGCGATT	202001	bc2-18	AAACTTGTGCTTACGTCGG	202001	bc3-18	CGATTTCAATCGCGAACTA	202001
bc1-19	ATGACTTGTTCCTGCCA	202010	bc2-19	ATGAGTGCGATCACCTGTT	202010	bc3-19	TATACAGCTCTCGTCCGTA	202010
bc1-20	AACCGATAGTTGTACGT	202011	bc2-20	CCAATTGTGTCGAGAGGTA	202011	bc3-20	CGCCATCCTCGTTTAAAGG	202011
bc1-21	TCGTAGAGTTTAACCAG	202100	bc2-21	CATGTCCCGATAGGAGACC	202100	bc3-21	AGGGTCAGGACAGCTCTGT	202100
bc1-22	ACCGTGTGGGATGTCGA	202101	bc2-22	TGATGTGCGGGAATGTTAC	202101	bc3-22	CGGGAGCATAATTCGGAGT	202101
bc1-23	TCAGTCCGTGTTAACGA	202110	bc2-23	TTCTTAGCTAGGATGATCG	202110	bc3-23	ATACACCAGGCGGGTAATG	202110
bc1-24	GTTACTGAACAGGTATG	202111	bc2-24	TTTGACAAGGGCAAAGGCT	202111	bc3-24	AAACAGTCTGCCTGTATTC	202111
bc1-25	CGGTCTATATCCCGCAA	212000	bc2-25	GCCTCACCAGGTAATTACG	212000	bc3-25	CAGAGGATGGTAGGTTCAT	212000
bc1-26	GCTTCGAAGAAGTGCCC	212001	bc2-26	ACAGGTGTGGTCACATCAA	212001	bc3-26	GGTTTAAACACCTCGATGT	212001
bc1-27	GCCTATCTACCCGGATA	212010	bc2-27	GCTATGTCTAGCGCGACTT	212010	bc3-27	TATGCTTCTACCCATCGGT	212010
bc1-28	CCCAGCTAGTAAGTGTC	212011	bc2-28	CAGCTGGCTGACGTATATC	212011	bc3-28	AGAACACATTCATGGGCAT	212011
bc1-29	GCACTGGCGTATACACT	212100	bc2-29	CCTAGGAGCTCATCAGTAG	212100	bc3-29	CGTAGCGAGAACCTTCGTT	212100
bc1-30	ATGGACAGGACACTAAG	212101	bc2-30	CTACCGTGCATAGTGTTCC	212101	bc3-30	GGTAACAAGGTTCCGTAAC	212101
bc1-31	TAGTTGCAGACCTGAAG	212110	bc2-31	ACAAGTACCGGGTCAGGTA	212110	bc3-31	AGTTTCTCATGTACGTGCA	212110
bc1-32	ATGGCCACTTAGGTTTG	212111	bc2-32	GTCACCCATGAGTGAACAC	212111	bc3-32	TGGCCTCAGGAGGATTATC	212111
bc1-33	TGCACGAATGCGGGTAT	200200	bc2-33	AGACCGGGTGTTACTTGTG	200200	bc3-33	GCACATAACACATTACGGT	200200
bc1-34	CAAATGCCGAGAGCTTT	200201	bc2-34	ATCCACGCAAAGAGGTCGT	200201	bc3-34	GGGATTCCTAACGATGTTG	200201
bc1-35	TTAACTGGTGTGGATTC	200210	bc2-35	GTCTCATCTTAGTCCACAA	200210	bc3-35	CCTGCTAGCTCACTTGACG	200210
bc1-36	TCGGATGCTCCAATGGG	200211	bc2-36	GTCGGCAACTTACCGTAGG	200211	bc3-36	ATCAAACGACAGGCGGTTA	200211
bc1-37	TCGAGGAGTACAAATCC	201200	bc2-37	TGTTCTTACAATACGCCTC	201200	bc3-37	TCTGATTTCTTGGGACGAC	201200
bc1-38	GCATGCGGATGCACAAT	201201	bc2-38	TATGAGCGAGATGAACATC	201201	bc3-38	AGCAGGGTGTTCGCATCTT	201201
bc1-39	CAAGTAGTATTGCTGCA	201210	bc2-39	ACTGGCCCATGATCCATCA	201210	bc3-39	TCCCAAGACAACCGTGGGT	201210
bc1-40	ACCTAGTAATTCCGGTG	201211	bc2-40	CACAGAATATGGCATGTCG	201211	bc3-40	TGCCATCAAGAGCTTGCAC	201211
bc1-41	ACCGACTACGATACAAG	210200	bc2-41	AAAGTACAGGCTTCCTACC	210200	bc3-41	GTACCGGAGACCAGTGCTT	210200
bc1-42	ACCTCCGTTATGCTCAG	210201	bc2-42	TGGAAGCCGGATCACATGT	210201	bc3-42	CTCCCGTTACGTTATGACT	210201
bc1-43	GCCATGAGAATCGGCTC	210210	bc2-43	ACAGTAAACCTGGGCGTAT	210210	bc3-43	TGAGTGCAATGATCGATGT	210210
bc1-44	ATAGCCCTCCGTCATAT	210211	bc2-44	ATTCGGTCCTCTCCCGATA	210211	bc3-44	AAGCCTCAAGTACGCTTAT	210211
bc1-45	CCATTGATTCCCGTTAT	211200	bc2-45	TTACCGTAAGCTTGAGAGG	211200	bc3-45	GTAAACTCTGTCCTAAGCC	211200
bc1-46	CTTGAGCCCATCAAAGG	211201	bc2-46	CTTAAAGCTGGCTCAAGAG	211201	bc3-46	CTACTTAGCGGGTTATCCC	211201
bc1-47	TATCGGTATGCGCGAAC	211210	bc2-47	GAACATCCCGATTGTAAGC	211210	bc3-47	CAAAGGGTTGTGAGGACAC	211210
bc1-48	GACCTCAATCCGACAGG	211211	bc2-48	TTCGCACCCTAAAGCGACA	211211	bc3-48	TAGCCGCCTGTAATCAAGC	211211
bc1-49	GTTCCTATTTGCACAGA	200020	bc2-49	GCAATCTTCATGCAACCGC	200020	bc3-49	TTACGATTGGAGGGCCTTT	200020
bc1-50	CCGAAATTCGACGAGCA	200021	bc2-50	GCTATTAAGAGGATAGCTG	200021	bc3-50	GCTTTGTACTATGATCACC	200021
bc1-51	TCACCGGGTTAACCAGA	200120	bc2-51	CCACGTTTACTGCTCGCAA	200120	bc3-51	CCTCAGTTGTGGGATAATC	200120
bc1-52	AAGTGCTGAACCGTTGT	200121	bc2-52	CTCAGAGCCGGAATTGCAA	200121	bc3-52	AGCATTCCAATAGTGCAGG	200121
bc1-53	GTAGCCTAAGCTACCAA	201020	bc2-53	TACGTCCTGCGGACATTTC	201020	bc3-53	CGCCTGAGACGTTAGAACA	201020
bc1-54	AACAAGTGGAGAACTGC	201021	bc2-54	GGCCCTAGTCATAGCTGGA	201021	bc3-54	TGGATATCTCGATGCTTCG	201021
bc1-55	TTCGAACCGATTAAGAG	201120	bc2-55	CTCAGCGAAAGTGATTCTG	201120	bc3-55	AGCCAATATCGATAGGTCG	201120
bc1-56	GCAATAACTGACATCCA	201121	bc2-56	GGAACGTCCTGACGAATGA	201121	bc3-56	ACCGACGTCCAAGTGTCTA	201121
bc1-57	CAGGTTTGCATCTAAGT	210020	bc2-57	GTCGACCCTCTGAATGAAG	210020	bc3-57	CGACCGTAGTCTTGGAATG	210020
bc1-58	AAATCGGGTCTCAGCCT	210021	bc2-58	AGTTCGTAACGGATTTGCA	210021	bc3-58	AGGTCGGCTCCATGCTCAA	210021
bc1-59	GATCCGGTGAGATGTCT	210120	bc2-59	CGCAGCTTGGTGCTAACAC	210120	bc3-59	CAGTTACCCGTTCCGCTGA	210120
bc1-60	GCCACGTTGGCAGTTTA	210121	bc2-60	TTCAGGCAGGGTATGTACT	210121	bc3-60	GTAATTCAGCTCGCCTTAC	210121
bc1-61	CATTGCTTACAGAACCA	211020	bc2-61	TGCAGATATTCCTATTCGC	211020	bc3-61	ACCGTCGGATCTGAGGATA	211020
bc1-62	ACTCGCCTGCTCAAGTA	211021	bc2-62	CTCCGAGGATTTGCGTGAA	211021	bc3-62	GTCGTCCGAAGGCTATCTT	211021
bc1-63	TCGGACAAGCCGCCTTA	211120	bc2-63	CTTATGAAGTGAGGGCAAG	211120	bc3-63	GGACTCGAGCATAGGCATT	211120
bc1-64	TCCTTAGGCCATTAGAC	211121	bc2-64	GCAATTTGTTACGCGGTAG	211121	bc3-64	ACCTGTGGCTACTCAGATC	211121
bc1-65	GTGACGGTTTGCTTACG	200002	bc2-65	CGAGTGAAGCAACCGGCTA	200002	bc3-65	CTCAGCCGTCGATCAATAC	200002
bc1-66	ATCACCGTCACGCAAGG	200012	bc2-66	TGTTAGACTGTTCACCCTC	200012	bc3-66	GCTGAGGGACGATATACCG	200012
bc1-67	CGGGATTAGTGGCTTCG	200102	bc2-67	TTACACCGCGTAGGTCTCT	200102	bc3-67	GCGCTATGTTCTGATTGGA	200102
bc1-68	GGACTGCGACAGTTGTG	200112	bc2-68	ACGGCTCGAACTATGCTAC	200112	bc3-68	TTCCGCATCGGACTTCTCG	200112
bc1-69	GACACTGATTCCTGTTG	201002	bc2-69	CGTCAGTCTGTCTCGCATG	201002	bc3-69	GTATGATCGCTACAAAGAC	201002
bc1-70	CTTAGGCCCTTATTCGA	201012	bc2-70	GGGATCTGGGCTAATCTCC	201012	bc3-70	CTTGAGAACCCACAATACG	201012
bc1-71	ATGTTCGCGGTTAGCAG	201102	bc2-71	TACCAGAACTTGCACAGGC	201102	bc3-71	TTCACGTTTAAGGGCGTTA	201102
bc1-72	CATCAAGTTTGGCCAGC	201112	bc2-72	GACGACTTCTTATGCAGGT	201112	bc3-72	CTCAGGTGGACGTATTGGT	201112
bc1-73	ACAGATCCACCATGGAG	210002	bc2-73	CTTGTGGGAGAAGCCCTCA	210002	bc3-73	TGACCTCCAACACCTTGTT	210002
bc1-74	TTGCGGAGTGCATCTAT	210012	bc2-74	ACGGGATTGCGATTTCTAG	210012	bc3-74	CATGTGGACATGGAGCGAC	210012
bc1-75	GACCATTTCAGGCTGCA	210102	bc2-75	CTCACGAAATAGCGCACCA	210102	bc3-75	CTGAGTAAATCTACTGCGC	210102
bc1-76	GACCCGTCTCTAAACGT	210112	bc2-76	TACAGATTGACGGTACCGA	210112	bc3-76	GCAGGCTACCTTAATTGGC	210112
bc1-77	CCGATTCGACAGCTGAC	211002	bc2-77	TGCCATGTGACAAACTCGT	211002	bc3-77	GCCGACTAGAGCAAATGGT	211002
bc1-78	AAGTGTCTTCCTCGGAC	211012	bc2-78	AGGAGCTCTGTACATAGCT	211012	bc3-78	ACCGTTGTTTCTCCAAGTA	211012
bc1-79	CTCAGGCAATTCAGCCA	211102	bc2-79	AGGCTTTGTTCGGTATAGA	211102	bc3-79	TCTGTCAACTACGACAGGG	211102
bc1-80	TCAGCAAGGTTGAAGTC	211112	bc2-80	AAGCGGTTTCGTGCGTAGA	211112	bc3-80	CTGGATGTGCACCATTATG	211112
bc1-81	TCTGTCACCAGCCTTCT	022000	bc2-81	CTAGAATTGTGACTTGCTC	022000	bc3-81	GATCCTTCCTCGCAACAAT	022000
bc1-82	GACGTTGGAAGATGCTA	022001	bc2-82	ATCAGCTCAAGCGATAAGT	022001	bc3-82	TGACGGTCTCGGATTGCCT	022001
bc1-83	TCATGGACCTCCTGAAA	022010	bc2-83	TTCAGTAGATACGCGAAGC	022010	bc3-83	AATCTTGACCCATGCCATG	022010
bc1-84	TCGACTGCTGATCCCAC	022011	bc2-84	TGTGTTACAGCACCTCTTG	022011	bc3-84	ATTGATTCGAGTGGGCGTT	022011
bc1-85	ATCTTCGTACCATACAG	022100	bc2-85	GTGATATCCTAACGGGTTT	022100	bc3-85	AGGTCTCCGCAAATCACAG	022100
bc1-86	CATAGCATCGCTAGTGG	022101	bc2-86	TCTGGAAGGTCATATGGCT	022101	bc3-86	TGACTCCCTTACGGACTGT	022101
bc1-87	CCTAACGACGTAAAGGA	022110	bc2-87	CTAAGACAAACACTGGTGG	022110	bc3-87	TTGGCATTTACACGGGAGT	022110
bc1-88	GCTTTAATTTCTCGACC	022111	bc2-88	AGCGCCTATTGCACCACAA	022111	bc3-88	GGGCTCATGATGCCTGGAT	022111
bc1-89	TTCGATATGTTGGGCGA	122000	bc2-89	AGCCCGCATTTCGCTCGAA	122000	bc3-89	TTACTGTCCCAAGGAGTAT	122000
bc1-90	CAAGGATGTTATACCCT	122001	bc2-90	ACCTGACAAGGACGAGTCA	122001	bc3-90	CTTGCTATTGGTGACCAAC	122001
bc1-91	GATTTGCATAGGCCGAT	122010	bc2-91	AAGCTGTGGCCTCATGAGT	122010	bc3-91	AGGTGCCTTATTGACGGAA	122010
bc1-92	CCGTGCACTCCTACTAG	122011	bc2-92	TCCCAGTATCGACATTTGG	122011	bc3-92	ATTTACCGCGTTACGTCCC	122011
bc1-93	TGTACGCTCGGTCACCA	122100	bc2-93	AAAGTTCGTCCTCGAGAAG	122100	bc3-93	GTGGCGGATATTACACTGG	122100
bc1-94	TCAGCGCCCTATATTGC	122101	bc2-94	ATCTGAGCACCTGCCATTC	122101	bc3-94	GAGCTGCTCCGTAACTTTG	122101
bc1-95	TCATGGCGTGAATGCGG	122110	bc2-95	GTCAGTACCGGATCAGAAC	122110	bc3-95	CTCCCGGATTCCTGAATGG	122110
bc1-96	ACCTGCAAACCGACAAT	122111	bc2-96	ACGCCTTGGTTTGCGGTTA	122111	bc3-96	AGCACCCTCTATGGCACTT	122111
bc1-97	CCTGCTATGTGAGCTCC	020200	bc2-97	ATCTAGCAGTCGGATGAGA	020200	bc3-97	GTAGGCCCATTCAATCGAG	020200
bc1-98	CCAGGCTCCTATAGAAC	020201	bc2-98	TAGCTGGGCGATAGTGCAT	020201	bc3-98	CTCGCTCGAGAAAGCTAGG	020201
bc1-99	AAGCTTATCAGCACCAA	020210	bc2-99	TATCCGTTAACTGCAAAGC	020210	bc3-99	ACTTTAAGGCGCTGCTATG	020210
bc1-100	CTCATGAACGAAGTAGT	020211	bc2-100	CCAAACGTCACAGCGCGTT	020211	bc3-100	GGCATGGCTCTTTACCGTT	020211
bc1-101	AACGTGAAGGTCAACAT	021200	bc2-101	CTCGTGGAGGTAACAACAC	021200	bc3-101	CCGGGAGATGAATAAGTGC	021200
bc1-102	TTGGGCAAGTCATGCGC	021201	bc2-102	TGAGACTATGTCGGATGCA	021201	bc3-102	AGCCCTGTTTGCGCTAGGT	021201
bc1-103	AAGGCCTTATTCCCATG	021210	bc2-103	CGACGGTGAGACCTCGAAA	021210	bc3-103	TGTTCTCTATCAGGGCTGA	021210
bc1-104	TCCCGGAGATCGACTTG	021211	bc2-104	ATAGACTACTGGCGAAGTG	021211	bc3-104	CGTAGAAGGAACGCCCTAA	021211
bc1-105	ACGCCCTGAACAAGCTG	120200	bc2-105	CTCGGCTATCCGACTTTAT	120200	bc3-105	AACACAGTAGCTAGGGTTG	120200
bc1-106	CGGATCGAGTGCACAAG	120201	bc2-106	AATGCAGATCCTAGCAAGG	120201	bc3-106	ACATGGTTAAGCGAGCTCT	120201
bc1-107	CCTTAGACTTCTAGTTC	120210	bc2-107	AATGTCTACTGGGTTCGTA	120210	bc3-107	CAGAATAGATCGCATTCGG	120210
bc1-108	TGATCCAGCCAACTGTG	120211	bc2-108	GGACCATTAGCATGGATGA	120211	bc3-108	AGGCAGGTCTGATCCCGAT	120211
bc1-109	CGCGTATGGGATTGACC	121200	bc2-109	ACTACCTCGCAGTGCTGTC	121200	bc3-109	CTATTGTACAACTCGTCAC	121200
bc1-110	GGATTCCGTTACCATAC	121201	bc2-110	TAAGAATCCTCCGACCGTA	121201	bc3-110	GGAAATTCACCTTCGTACT	121201
bc1-111	GCGCCTAGATTGGGACA	121210	bc2-111	GTTACTCCCAGAGACTAGT	121210	bc3-111	GTTAACCTTTGGGAGGCTA	121210
bc1-112	CCATCTGCCAGGCATGA	121211	bc2-112	ACTTCACCGGGACATATAC	121211	bc3-112	GGTCAGAACTTATCCGCAA	121211
bc1-113	CCCATGCCTACATCAAG	020020	bc2-113	GTAGCTTTGACCTCGTGCT	020020	bc3-113	AGCCGGATTCTCCTGCAAC	020020
bc1-114	CATATGTTCACGAGGAA	020021	bc2-114	CGTCACCATCTGTCTAAAG	020021	bc3-114	ATTCAAACGCGCTAAAGCG	020021
bc1-115	CATCTTGACAGGCGTAG	020120	bc2-115	AATGTAGCCTGGAGCCTCT	020120	bc3-115	GCTATAGGGAGCTCGAGCA	020120
bc1-116	GTCGATTGTTTCGAAAG	020121	bc2-116	GGTAATACCAGTACCCAAT	020121	bc3-116	TGCCCAGGAAATGTTGACG	020121
bc1-117	CTCATAGGATTTAGACC	021020	bc2-117	GCTGCCCTATTCCTGGGTA	021020	bc3-117	CCTAGTGTTCAAGATATGG	021020
bc1-118	TCGCATTGTATCCCTCC	021021	bc2-118	GAGAGCCCTAACCTCGTTT	021021	bc3-118	CGTTTATCCGGATGTCTAA	021021
bc1-119	CAAGATGGCACAGGTGT	021120	bc2-119	ACTAGTATGCACTGGTTCC	021120	bc3-119	TAAGTGCTTGTGCTAGGAG	021120
bc1-120	GACACATTTGGACCGAT	021121	bc2-120	AGAAACTTCAACTCGAGTC	021121	bc3-120	CGGAGTGATCTTAACGCGA	021121
bc1-121	ACGTCATCCCTATTGGG	120020	bc2-121	CTGATAAACGTTATGGCGG	120020	bc3-121	CGTCCCTTACCGATAGAGA	120020
bc1-122	TGCTAATATCCCGGTAG	120021	bc2-122	CAAGTATGGATGTCCTGAA	120021	bc3-122	AGTAGGTTCCGAATAGCCA	120021
bc1-123	GCTCGACTCCCTCTGTA	120120	bc2-123	AGCGTTTCGAACACATGTC	120120	bc3-123	TCAGGGTTGGAGTATATGC	120120
bc1-124	CAGTCTCTTTATCCCGC	120121	bc2-124	TACTGGTTATGTGTAAGGC	120121	bc3-124	CAGTATTTGGGCCTCTATC	120121
bc1-125	GTCAACCCGATTCATCT	121020	bc2-125	GGATCAGCCGGAACTATGA	121020	bc3-125	GCGTGAGGTTAACGACATC	121020
bc1-126	ATGCTCCTATGTGCCTA	121021	bc2-126	TTTGCCATCTCCTTCCAGG	121021	bc3-126	CTGCAGGTTTCTACGAAGA	121021
bc1-127	GCTACTAGTCACGTTAC	121120	bc2-127	CGCGCCATAATCCAACGAT	121120	bc3-127	GTGAATATCGCGACTTGCA	121120
bc1-128	CAGTTAGAGGGCTTATT	121121	bc2-128	ATCTTCGATACGTTCGCAC	121121	bc3-128	CTGTCAATAACAGTACAGC	121121
bc1-129	TCGAAGACAGACATCTT	020002	bc2-129	GACTTGGAGGCATCGATAC	020002	bc3-129	TTCAATGCAGGGCAACTAC	020002
bc1-130	ACTTGCTCCATAAAGGC	020012	bc2-130	TCATATGACTCTAATCGGG	020012	bc3-130	ACGCTGAGATTCCAGGATT	020012
bc1-131	GTAGCACGATGTAAAGC	020102	bc2-131	GCGATAATGACGATGTGGA	020102	bc3-131	CGTCTCACGTATAGCTCGT	020102
bc1-132	ATCTAGGTCACAAACGA	020112	bc2-132	CTAGGCATCGTCAGCGAAC	020112	bc3-132	TTCTCAAGGGAATGGAATC	020112
bc1-133	ACGTAATTGTGGCAATG	021002	bc2-133	GAGCCCTGTGTTAGTAGAC	021002	bc3-133	AACCTAGGCGAAGAACTTG	021002
bc1-134	TCCGGCACACTATCTGG	021012	bc2-134	CACTAGGCCGTAACTGACG	021012	bc3-134	CCATCGTTCTCGTCGATGG	021012
bc1-135	CCCAATGGACAACGATT	021102	bc2-135	AGATTCCCGAGAATACGCT	021102	bc3-135	GCGGAATGGATCCTAGGTT	021102
bc1-136	GTCGGGACCATGTATGG	021112	bc2-136	AAAGGTAGCACCCTTAGAT	021112	bc3-136	TCGATTTAGCAATCGCGTG	021112
bc1-137	CTGTACTAGCCGTTGTT	120002	bc2-137	GGGATCGATGAATGTTCTC	120002	bc3-137	GCGTGAACAAAGGGCTCTG	120002
bc1-138	GGAATTCGGGTGCAATC	120012	bc2-138	ATCTATTGCAAACGGGATG	120012	bc3-138	CGAGTATAATGGATAGCGA	120012
bc1-139	AATTCGCTTCCAAAGCA	120102	bc2-139	AATCTGCCAAGCGCTACCA	120102	bc3-139	ACATAGTCGGAGATGTATC	120102
bc1-140	TAAGCTCCTACTGGCAG	120112	bc2-140	GAGTGGGTCCAAGCCCAAT	120112	bc3-140	GAAATCCTTCTGATGTCCG	120112
bc1-141	GCGAATACTCTCAAGAT	121002	bc2-141	TAAGTCTGCGGATTGGGCA	121002	bc3-141	GGCAATGCGTGGTCTAAGA	121002
bc1-142	ATCAGAGGAAGGTGTCC	121012	bc2-142	AAGACTGATGTGATCGCCA	121012	bc3-142	GCGTGTTACTCTAGCTACA	121012
bc1-143	GCCATCAACTGCGCAAT	121102	bc2-143	GAATGGGCGGATCATAGAC	121102	bc3-143	GATAAGGACTACTGCAATG	121102
bc1-144	TTAGCCGATAGCGCGAG	121112	bc2-144	CAAGCGGGTATTCCCGACT	121112	bc3-144	TGAACCGTATTCAGTTGAC	121112
bc1-145	TAACAGACAGTATAGCC	002200	bc2-145	ATAGGCAGACCTATTGCTA	002200	bc3-145	CAGGGTGAATGCAACAGGA	002200
bc1-146	GCCTAGACCCTTTAGTC	002201	bc2-146	TTTACCTGATGAAGGAGGC	002201	bc3-146	GCGAAAGTCTGCAAGTGTA	002201
bc1-147	TAAGACATGTCCGGAGT	002210	bc2-147	ACCGGTGCATTTGGCCCAT	002210	bc3-147	CTTTGTTAGGCAAGTACGG	002210
bc1-148	GACAGCTGGGACATCCT	002211	bc2-148	CTTTGACCGTGCTTCATGA	002211	bc3-148	TTGATTCACACTCCGTCGA	002211
bc1-149	GCATCACGAGCCTAGGA	012200	bc2-149	TAGGTCGTTGCCCATCCTA	012200	bc3-149	ACGACAACTTTCTGATAGC	012200
bc1-150	CGAATAATATGCGACGA	012201	bc2-150	CATACACAGTGTAGCCACC	012201	bc3-150	TCCAGAGGACAAGTGCGAG	012201
bc1-151	TCCGAGCAACCCTATCG	012210	bc2-151	ACGCGCTATTGCGAACGGA	012210	bc3-151	CCCATGGTCGTATTGTCGT	012210
bc1-152	ACTCGTTAAAGTCCTAG	012211	bc2-152	TCCAACGAAGATCTGTCGC	012211	bc3-152	CACTTTACGGGTAGTTCCC	012211
bc1-153	CTATCCGAGGTGAAGCA	102200	bc2-153	TACCTTTGTCCGGATATGA	102200	bc3-153	CTGCCGAAGATCCCAAGAG	102200
bc1-154	TCTGAGGCTCTGTTCAC	102201	bc2-154	TTAGCCCGGATTTCGCGAT	102201	bc3-154	GAGTGATGCGCCACTTCTC	102201
bc1-155	CAGTTCTAACAATTGGG	102210	bc2-155	CCCGGTCATACAAGGTCGA	102210	bc3-155	CTGATTCCGAGCTAGAGGG	102210
bc1-156	TAATACGGGCCTTGGAT	102211	bc2-156	GCCACTCAAGATCAAACCG	102211	bc3-156	TTCATTGTGGTGTCGGAGA	102211
bc1-157	CCCGTCATAAGGTCTCA	112200	bc2-157	GCAGCCTCTAGTTACGGGT	112200	bc3-157	AATCACGCGAGATTGATGC	112200
bc1-158	GAGACATCCAACTTTGA	112201	bc2-158	GGTTGGACCATGCCTTCAC	112201	bc3-158	AGTTGAGCTGTAAGACTGC	112201
bc1-159	GGTTATCGGTTTGAGCT	112210	bc2-159	TTCGAGTGACTAAGCGAAG	112210	bc3-159	GACTAAGTCCTCCCTGCAT	112210
bc1-160	CTTTAGGGCGATAAGGG	112211	bc2-160	TTTGGACCTGATGCTCACG	112211	bc3-160	ATGCACCTTGATCTTCAAG	112211
bc1-161	GACCTTCGCACCGTTTC	002020	bc2-161	GGTTCTATGCTGACGTTAA	002020	bc3-161	TAGAATGTCCACTTGAGTG	002020
bc1-162	TTCAGCGCAGTGTGGAG	002021	bc2-162	ACATAAGAGTCTCGCTGGA	002021	bc3-162	TCGAGTAATTAGGAACCGC	002021
bc1-163	CTTACGGTCGAACCGGA	002120	bc2-163	GACTCGTTTGACCATGGTT	002120	bc3-163	GGGCAGTTGGCAAACTTGC	002120
bc1-164	CATGTATCGCATATGTG	002121	bc2-164	CCGCATAGGTCCAGATTTC	002121	bc3-164	GGCAACTGTCTGGTAGAAT	002121
bc1-165	ACACCGTGAGATGGTCT	012020	bc2-165	AATGACCAGCTCGGACGAA	012020	bc3-165	GGCTATTTCCGAACCTTCC	012020
bc1-166	CGGTAGGCTTATGGAAG	012021	bc2-166	AAATAGCTGCGCTTATCCG	012021	bc3-166	AAAGCATGCGGTACGTATA	012021
bc1-167	TCTAAGCATGCAGACCA	012120	bc2-167	TGCCGAAGGGCATGCACTA	012120	bc3-167	CATCCGCACAGACATGAGT	012120
bc1-168	TCTACCGCGAAGATTGA	012121	bc2-168	ATTTGGATCCACGTACAGG	012121	bc3-168	GGAGCTACCTCTTAGGTGT	012121
bc1-169	GACATGCTGTTGCGACA	102020	bc2-169	CCTAATGAGAAGGCAGTCG	102020	bc3-169	GGAATCACGGAAGTACCTA	102020
bc1-170	CCCTAAGAAGTGGACTT	102021	bc2-170	TCCCATAGTAGTAGCGACT	102021	bc3-170	TCGAACACCTGGACGAACG	102021
bc1-171	ACACCTGCTAAATGGAC	102120	bc2-171	GCCCATGTCGCTAGGAAAT	102120	bc3-171	GCGGAGATGAGTGCCCTTT	102120
bc1-172	GTTATCGGCGTCTACGA	102121	bc2-172	ACGGATATTTGGAGGTTCC	102121	bc3-172	CGTGGCGTATCTTGCATCA	102121
bc1-173	CTCAGAGCTAATAGAGG	112020	bc2-173	GCATAGCAGACAAGATGCT	112020	bc3-173	TGTTTCAGTCCAGCTTCAC	112020
bc1-174	TGCAGTATGGAGGTCTT	112021	bc2-174	AACAGGTACCATCCGTTTG	112021	bc3-174	TGCGACGAGTCTATGTCTC	112021
bc1-175	TACAACGGGTTACAACT	112120	bc2-175	TTGCTAATCAAGACCTGTG	112120	bc3-175	ACAAATCAGACTCTACCGT	112120
bc1-176	TATCGAAACCCATGTAG	112121	bc2-176	GTAGAGGGCACCGTACGAT	112121	bc3-176	CATACTGTCCGTGACCTGT	112121
bc1-177	GCTGACTCTATAGCGGG	002002	bc2-177	TGTCAAATGGACGTTCGTG	002002	bc3-177	ACCGTGAAGCCTCGCCATA	002002
bc1-178	TGTTACGGGAGAGCTCA	002012	bc2-178	CGGATGCTTTAAGCGCGTA	002012	bc3-178	CGCTGTTATTTGGCGTAAG	002012
bc1-179	CCGAAGTCTGTGTACCC	002102	bc2-179	GATACAAGATTGGTTCCAC	002102	bc3-179	GCTAGGGTGCAACATGTCT	002102
bc1-180	TTTCACGTACGATGGTA	002112	bc2-180	ACCCATCGACCTAATAAGC	002112	bc3-180	GCATTAACCCAGCTCGTGA	002112
bc1-181	GCTGATGGTAGCGAGCA	012002	bc2-181	AACCTGGTTTGACGCGATA	012002	bc3-181	ATCGCCATGGCAACATGGC	012002
bc1-182	CGCACATTTAGTCCTCA	012012	bc2-182	ATGTTCATGTTGGGTACGA	012012	bc3-182	TTTCGAGTTTCTCGCGAAC	012012
bc1-183	ATCGCTTCTGTTGACGC	012102	bc2-183	TCTTCAAAGTGTCCCTCAT	012102	bc3-183	ATAAACACGTGCGTAACCG	012102
bc1-184	GTCCACGACCGTTGTAA	012112	bc2-184	TGACGACAGATAGGTCTAC	012112	bc3-184	CTGCATCATAATTTCACCG	012112
bc1-185	ACGTGGAACGGTCCCAT	102002	bc2-185	AATGCTATCCTGACTTACC	102002	bc3-185	TACTGAAGACATGCTCCGT	102002
bc1-186	GCAAGGTCCTAAACAGG	102012	bc2-186	ATGCAAGGGACGACAGCAT	102012	bc3-186	CGATGGTTTCCGTAGCAAC	102012
bc1-187	TAAGTACCCTCAGGAAC	102102	bc2-187	GTTATGCTGCCCATAACCG	102102	bc3-187	CCCAGATGTCTACCGTTAG	102102
bc1-188	GTTAACGATATTGCCAC	102112	bc2-188	AAACGGAATGTAAGCGCTT	102112	bc3-188	AGCTTACACGTAGGACTAG	102112
bc1-189	TCAAAGAACCTCTTGGC	112002	bc2-189	GCGATTCTCGCTCTACGAC	112002	bc3-189	TGACGCAACCAGGTCCCAA	112002
bc1-190	GATGCTATAGTGGAAAC	112012	bc2-190	TGGCCCACAGCACGTTTCT	112012	bc3-190	GCGTTAGAGAAACCGGTCT	112012
bc1-191	AATGCACCTATTCATGC	112102	bc2-191	TTGGACCTCGCGCTTCATC	112102	bc3-191	GCCATTATTACAGCGCTAC	112102
bc1-192	TTGACTCGGGTCTTTAG	112112	bc2-192	GGCTTAACAGTCATTCGGG	112112	bc3-192	CTGTAACAGTCTTATAGGC	112112
bc1-193	TACTTGGGTGTGACCTC	000220	bc2-193	ACACGGGTTCGACTTCACC	000220	bc3-193	AGCTCCGCATTATCTAGCC	000220
bc1-194	GTTGACTTCCGCACTCA	000221	bc2-194	GAACACTTTCAGCCGTGAA	000221	bc3-194	CCGCTGTACGCCTAGTTTG	000221
bc1-195	AGAACTAAGCGTGTTGG	001220	bc2-195	TGCTGCTAATAGTCGGCCA	001220	bc3-195	TCAGATATGAAACTCGTCG	001220
bc1-196	ATGCGCTGGCTAGTGCA	001221	bc2-196	GGCACAATAGGAAGTGTTC	001221	bc3-196	CTATCAGTCCTACCCGTTG	001221
bc1-197	AATAGTCGACCCAGTTA	010220	bc2-197	ACGGGTTGCAAGCATCCTT	010220	bc3-197	AGCACGTTAGTTCGCCTAA	010220
bc1-198	GAGTCAGGTCTCAATGA	010221	bc2-198	ACGTCCCTCCATCTTGATG	010221	bc3-198	CCCGTCGATAAGGAGAACT	010221
bc1-199	GGTAGCCCTGCTCATTC	011220	bc2-199	TTAAACGGAGAGCCTGCTA	011220	bc3-199	GAACTAATCATGCCTCACG	011220
bc1-200	ATGATCTTCCACTTTGG	011221	bc2-200	ACAGATGAACGCAAGTCCT	011221	bc3-200	AAATCAGCTTGAGCGGCTT	011221
bc1-201	ATAGTCAAGGCTCACGT	100220	bc2-201	TCGGAGCTTGGCTATATCC	100220	bc3-201	CCGGAGTAGTTACGCCTTA	100220
bc1-202	TGGCCTAGAACATCCGC	100221	bc2-202	ACGTCCGGTCGTATAACGA	100221	bc3-202	CTAGTTATGACGCCGACAT	100221
bc1-203	CTGGCGACGCATGTAAG	101220	bc2-203	GTAGGACAGGATCGCTATT	101220	bc3-203	AGGCTGTCCTCATGCCACT	101220
bc1-204	AGCGTGGCAGTCTCCAA	101221	bc2-204	CGAATGGGACTTCCCGTAC	101221	bc3-204	AAGTAAGGCCGGATGAAGC	101221
bc1-205	TGCGTAGATGGCCGTTT	110220	bc2-205	GTAAACCACCTGGAACGGA	110220	bc3-205	TCATAGGGTATCCTCTCCG	110220
bc1-206	TGACAATAGCCACCCAT	110221	bc2-206	TCGCGGACTAACTCGACCT	110221	bc3-206	TCCTAATGGGTGCGTCTCA	110221
bc1-207	CGTAGAGACGAGTGGAC	111220	bc2-207	ATTCCCGTCAAGCGGCCTA	111220	bc3-207	TTCACGGGACGCTTATTAC	111220
bc1-208	GTTATCCCTCGACGACA	111221	bc2-208	ATAATCCTGCTGTAAAGGG	111221	bc3-208	GACCTTGCCACCTCAGAAT	111221
bc1-209	CTAGTCTTCCCATTGAA	000202	bc2-209	CCTTAATCGCATGGGCTCT	000202	bc3-209	ATGCTTTCAGGCCAAAGTC	000202
bc1-210	AGTGAACTGTCATGGTA	000212	bc2-210	TTATCGAACACTCCTCAGT	000212	bc3-210	GCGAGCTTGTTGGGTCTAT	000212
bc1-211	TGCCGAAGCAAACGTTA	001202	bc2-211	GGTAAACACTGTTGCACAA	001202	bc3-211	CTGAGAACGGTGGATCCTC	001202
bc1-212	GCGTCAAGGTTATCTTC	001212	bc2-212	CTAGCTTATCTTACGGGTC	001212	bc3-212	CGTATACAAGGATGGTTGC	001212
bc1-213	TACATAGACGCGCAAGT	010202	bc2-213	CTGATAGTGCCACTATGGG	010202	bc3-213	TGTGAGCAGGATCCCGACA	010202
bc1-214	CTAAGCGGTGGCGTCAA	010212	bc2-214	GAGGCTCACCTCAGTAGGT	010212	bc3-214	ATAGGATCCCTTGATCAGT	010212
bc1-215	CTTGGAACTGTATACTG	011202	bc2-215	CAATAAGTGTTCGGCCATG	011202	bc3-215	GTTAACGCGCCACATACAG	011202
bc1-216	GGTCTAGTTTCCACATG	011212	bc2-216	TTCTTGTAGCAAAGCCATC	011212	bc3-216	ATGAAAGCAGGTGATGTGC	011212
bc1-217	TAAGACTTAGCATGCGA	100202	bc2-217	TCAAGGTGAAACGAATTCC	100202	bc3-217	AGACCTAAATTGGCGGGAT	100202
bc1-218	TAGCCTGTTTACCCGTA	100212	bc2-218	CTAATCGAGGTATTTCCTG	100212	bc3-218	GTCGACGTATGGGTTCAAT	100212
bc1-219	CAATGGTACGCTATTGT	101202	bc2-219	TATCGCTGTTAAGGGCTAT	101202	bc3-219	GTATTACCAACGTACCCGT	101202
bc1-220	CACTCGTCAACCGCTTT	101212	bc2-220	ACGTAAATGACCGGCAGAT	101212	bc3-220	CGCTTCACCGATCATGTTC	101212
bc1-221	GTACGTACTTCTAGGAA	110202	bc2-221	ACTGTCGCGTTCGCGACAA	110202	bc3-221	TAGTGTCTCCTAATCCGAA	110202
bc1-222	TGGCACGAAGCTAAACG	110212	bc2-222	CCATGATGGTGAATAGACC	110212	bc3-222	TGAACATGACGAAGGGTAC	110212
bc1-223	CCTTCAGTTGGCGCACA	111202	bc2-223	TACCGACCCGTATTCGTTC	111202	bc3-223	CTGCCACACTAGTTGGTTC	111202
bc1-224	ATTTGGCTGACTAGCAA	111212	bc2-224	ACTCGGGAAGCTACCTAGT	111212	bc3-224	AAGACCCTGGATGGGACAG	111212
bc1-225	CCGGTAGCGTCCTCTAA	000022	bc2-225	GTAGGCGTGGATGCTATCT	000022	bc3-225	GGCTTCGACCAGATCAGTA	000022
bc1-226	AGCCTGTTATGCTAGTG	000122	bc2-226	TGGCTAAGTGGTTTCAATG	000122	bc3-226	GTGCGAGACGGATAACACG	000122
bc1-227	CGTTTGAGAGTCAACCT	001022	bc2-227	GGGAACGTAAGAACTTTGC	001022	bc3-227	TCAATTGGCAGCTCGTTTA	001022
bc1-228	GGCGTGAACGGAAACTC	001122	bc2-228	TGAGGCAGGATTTGTTCCG	001122	bc3-228	TGATCCGCTACTAGCTTGA	001122
bc1-229	AGTCATACCTCGTTACC	010022	bc2-229	GCAAGATGCCGATATAAGC	010022	bc3-229	GCCTCTTATCGGTCGATCA	010022
bc1-230	CGAAATGTAGGTCTATG	010122	bc2-230	CATGGGAGACTACGCGTAA	010122	bc3-230	TTTATAGGCGACGAATGTG	010122
bc1-231	GTTCTATGGAAATGGCG	011022	bc2-231	GTAGAATCAAGCGTACGCA	011022	bc3-231	ACATTGCAAGAGCCAGCAT	011022
bc1-232	AGACCGTGGTAGGCCTT	011122	bc2-232	ACCTTGGGTAGCTGGGTCT	011122	bc3-232	AATGGGCTTCATCACGGTC	011122
bc1-233	TGGACCCTTGTGCGAAT	100022	bc2-233	TTCTACCGTGTACGCATGC	100022	bc3-233	TCAGCGCCATTGCGACTTT	100022
bc1-234	GAACCATCCAATTCATG	100122	bc2-234	TATCGGCGGTCTGTGAGCT	100122	bc3-234	TCACCCGTCCTAGATGATG	100122
bc1-235	TGATCGCTCCCTGGTAC	101022	bc2-235	ATTGCCTCTCGTTCACTCG	101022	bc3-235	CATCGGCCTTAGGAGCCAA	101022
bc1-236	GCAGCGTATGATCCCTT	101122	bc2-236	GAACTGCAACTCTCCTCGA	101122	bc3-236	CTTATTGCAAGGCTAGGCT	101122
bc1-237	AAGCAATCACCGCTGTT	110022	bc2-237	CCTCATTGTACAGGACTAT	110022	bc3-237	CTAGTAGTTAGGTGAACGC	110022
bc1-238	ATCCCAGAACTGCCCGA	110122	bc2-238	TACCCTGTCTTTGGGATGC	110122	bc3-238	CCATATCGGGCTAACTGCC	110122
bc1-239	AGTCTGTACGTCGGCTA	111022	bc2-239	CAAACTTTGCGCAATAACG	111022	bc3-239	GGACGAGCTACAAGCCTGT	111022
bc1-240	TGGCTAAGGGTTCGAGT	111122	bc2-240	ATTGTTGCTATGTCGACAG	111122	bc3-240	AACCGCATAAGTGCGGATT	111122
bc1-241	CTTCGGAGGCGTTTACG	212210	bc2-241	CCGCTACTCCGATTGATTG	212210	bc3-241	AAGGGCGGTAAGACTCGTT	212210
bc1-242	TTCCCAGCCCTATGATG	122102	bc2-242	CTATTTGCGACTGTGCGGT	122102	bc3-242	ACCTAAGCCGCACTGGCTA	122102
bc1-243	AGGTGCCGGTAGCTATC	022012	bc2-243	GCCATGTGGGTTAAGAACC	022012	bc3-243	CCCTTGTTATACGCCCGAT	022012
bc1-244	AGTATCGTAAGTCCTGC	122211	bc2-244	TAAAGAAGCGGCTGTTGAC	122211	bc3-244	CGACCTCACGTACTTGTTG	122211
bc1-245	CGGCTTAACTTGGAAGT	211221	bc2-245	GAGGACTGAGGCCCTTCAA	211221	bc3-245	CTTAACGACCAGAATTCTC	211221
bc1-246	TCAGATAGTCACGGTCA	210122	bc2-246	GGATTATCTACGCCACCTT	210122	bc3-246	GGGCCTGATGTCTAGAGCT	210122
bc1-247	TCCATGGCTCATCTGGG	222101	bc2-247	GCAGATGGTAGACGCATCA	222101	bc3-247	GAGCGGAGTTTCCATGGAT	222101
bc1-248	GGGACTATACCAAGGTG	212002	bc2-248	GAATCTCCATTAGGTCTTG	212002	bc3-248	CAAGACTCGCACGTTCGCT	212002
bc1-249	CGTTCAAGCGTTAAAGC	211212	bc2-249	AATCGTTTCGGGTATTGGC	211212	bc3-249	GTTTGACATGGCATCATAG	211212
bc1-250	TACCGGTTCGTACAGGG	121212	bc2-250	TCGAATGGATGTTACCAGA	121212	bc3-250	ACACTTTAGTGGAGCAGCA	121212
bc1-251	TAGACGCTGTCAGCCGT	221210	bc2-251	CAATGCTTAATGGTCTCGC	221210	bc3-251	AGTTGCAGCTGGCATTACA	221210
bc1-252	CGAAGTGATACAGGAGA	121202	bc2-252	GTCTTATACTGAAGGCCCA	121202	bc3-252	CAATGAAAGTTGCCTGATC	121202
bc1-253	GTCCGAGTCGTTACCTA	022211	bc2-253	ATTAGGCAAAGATGCTGCT	022211	bc3-253	CTTCTAGCCCTTTCGAGCG	022211
bc1-254	GGCCACTTGGGTAAGCA	101222	bc2-254	GAGAGTTTCGAGACCTCAT	101222	bc3-254	TTCACAGTCTCAGAACAGA	101222
bc1-255	CTGGCACTTTGTGCGAC	122002	bc2-255	AGGTGTTTCGTTAGCTAAG	122002	bc3-255	GTCCCTGACTTGACGTTCG	122002
bc1-256	CAGCGTTAGATAGAGCT	202201	bc2-256	AGAATGGACACTTGCTTCT	202201	bc3-256	GGACTGTGCATCTGACCAT	202201
bc1-257	TACGTCATACCATAGGC	122200	bc2-257	GGATGCGGTCGTACTTAAG	122200	bc3-257	CGACCGCTAATTGCTCAAC	122200
bc1-258	TCAAAGTTAGAGCCAAG	202112	bc2-258	CGGTAAGTCTCCGTACTGC	202112	bc3-258	AGGTTTCGAAGGGACCCTT	202112
bc1-259	CTGTTACTGCTGCATCG	120122	bc2-259	AAAGACATGGTGAGCCAGT	120122	bc3-259	GACGCCATTAAGGCTTCGA	120122
bc1-260	TTGGCAGGACTCGTGGA	122120	bc2-260	AACTTCGCCGGTTGGTACC	122120	bc3-260	TGCATCCCGGTCTGCACAA	122120
bc1-261	AGATCACTTCACATGTG	220121	bc2-261	TAATTGGTCGAGCCCATAG	220121	bc3-261	AATCAGGGATTTGGCGATA	220121
bc1-262	CGTGATAGAACTACTTC	102202	bc2-262	GCTGGTACCGTGATTGTGC	102202	bc3-262	TAAGGACAAACCTTCAGGT	102202
bc1-263	AAGCTGTGTAAATCCAC	022121	bc2-263	GCATAGATATGTAGCACCG	022121	bc3-263	ATGGCTTTACGCGATCCTT	022121
bc1-264	AAACTGATAGTCCTCCG	220012	bc2-264	TCCCTGGGAATTGTTCGAG	220012	bc3-264	ACATGAAGACTCGAGAGTC	220012
bc1-265	CGCGACTAGTACGTCAT	120022	bc2-265	GAATCCTTCGGCGGAGTAA	120022	bc3-265	AAGTCAAGTGGGCAAGATG	120022
bc1-266	CGATGTACGTTTGCATG	001222	bc2-266	TCAAGGGCTGCGAAATCAG	001222	bc3-266	TAAAGTCCCTTTGGTCAAG	001222
bc1-267	TGAGCATTCAAGTCGGT	020122	bc2-267	AGCATAACCCTATGCTTAC	020122	bc3-267	ACTCCCTGCTGGAAACTGT	020122
bc1-268	ACGAATTGACCAGGTAC	211202	bc2-268	GCGGATAGACCACAGGTTG	211202	bc3-268	TAGCGTTTAACGGTGAAGA	211202
bc1-269	TTATGCACTCACGAACG	102122	bc2-269	AGACGCCTCAATCTGGAAG	102122	bc3-269	AGCGTGCCTCAGTTCCTTT	102122
bc1-270	GGTCACGCATGTCCAAG	202012	bc2-270	TTTGTCCATCAGCGAATGG	202012	bc3-270	AGCGCAGTCCCAGTACAAG	202012
bc1-271	AGCAATAGCCTTAGTGC	012122	bc2-271	TCCAGCATAAAGCACGCAT	012122	bc3-271	CGAACCTCGGGACTAAACT	012122
bc1-272	TAGTCGATGTCGGTACG	120220	bc2-272	TGAAGCGGCCAGGTAGTTT	120220	bc3-272	GTCCTCTCACCTTCTAGGG	120220
bc1-273	CACTAGCCCAATCTGTC	112220	bc2-273	GATTTGCTTCCCTGCAAGT	112220	bc3-273	CGAGCTTTACGAACGCTTG	112220
bc1-274	GACTGCACAGCGTACAC	200022	bc2-274	TCCGGGTACATTGGTCCTT	200022	bc3-274	CGTGATATACTCGTTCGAC	200022
bc1-275	AGGCACTAGAGATATCG	122021	bc2-275	ACAACGTTTCATTGGAGGT	122021	bc3-275	CGCCTACTTCGGATATCTA	122021
bc1-276	TAAACCGCGAGACATTG	221211	bc2-276	CGTAGGTCGAAAGCCATGG	221211	bc3-276	TTTAGTCTCCTGGATCGAG	221211
bc1-277	TCTGATCGAACGCCTGA	222100	bc2-277	TGAGCGAGCAACTGTTGCT	222100	bc3-277	AGGCGAGTTGTTTACTTGG	222100
bc1-278	TGAACACCTTCGGGATG	012212	bc2-278	TGAGGCTCAGGTTTGAAAC	012212	bc3-278	ATTCTCTGTCAGGATCCTA	012212
bc1-279	TACCCGGAGCTAACACT	201220	bc2-279	AGGTAACCTCCATTACTGC	201220	bc3-279	GGAGACTCCCGATGTGTTG	201220
bc1-280	AAGTCTTGTTGGCGTAC	202200	bc2-280	GCATTATTGTCCCACTAGC	202200	bc3-280	GCTAACGGCAACAGAGACT	202200
bc1-281	AACGCTGACGCGCCTAT	002221	bc2-281	AACCGCTCCTAGTCGCTTT	002221	bc3-281	GGCTTGATCATCGACCGCT	002221
bc1-282	CGGATTAGTCCTAGCCA	020212	bc2-282	CCAAATTCGTTGGCCCTAG	020212	bc3-282	CTACCCTTGCTGTCTATGC	020212
bc1-283	TGCATCGTCGGTAGGAG	011222	bc2-283	AGTACATCCCTTTGCATTG	011222	bc3-283	TCATCTTTGAACCGCAGCT	011222
bc1-284	AACTTCGTACATGGGCG	221120	bc2-284	CGGTTCCATTGGCAAGCCA	221120	bc3-284	TGGGAGTGCTGACCAGTAT	221120
bc1-285	GGTTACTTGCCAGAGAT	111222	bc2-285	AATTGGTGCTCCAGCACGT	111222	bc3-285	CCCTAAGATAAATTAGGCG	111222
bc1-286	CATTGTCAATGCACGCT	212021	bc2-286	GATGCCACCACGGATTTCT	212021	bc3-286	TTTGACTCCACGAAATCCT	212021
bc1-287	CGCCTGAAGACTTGTCT	221200	bc2-287	CACGTAATCGAGCTGGCTT	221200	bc3-287	GGGTCACACTCAGTATCGC	221200
bc1-288	TCGCCTACCTTCGCTGA	200221	bc2-288	GACAAACATTCTGATGCGG	200221	bc3-288	CCTGGTAAGCGAGTCATAA	200221
bc1-289	TGTACCATCACTTGCGT	012221	bc2-289	CTTTCGACTCTGAGAACAG	012221	bc3-289	GGAATATACGCACCTAGAC	012221
bc1-290	TGAATGCACATGCACGC	220002	bc2-290	TGGAGCCAATTTCATCTGG	220002	bc3-290	TGCCACCTTGGCTCGAATC	220002
bc1-291	CTGAGGTTGCGGCAACT	021212	bc2-291	CCTTGCTATGGTCTATGGC	021212	bc3-291	TTTGCGAAACTGACCTCTG	021212
bc1-292	TTAGCGTCATTCGCCTA	200220	bc2-292	CGTCCAGCTCATGTGTATG	200220	bc3-292	GTCATAGAGACAACCTACG	200220
bc1-293	TTGCATAGCCTGAGGTT	222110	bc2-293	TAAATTCGGTGTTCGGACC	222110	bc3-293	AGACTCTAAAGTCGACCGA	222110
bc1-294	CCGGGTAGTCAATTCCA	020022	bc2-294	GGACTTTATTGGGATTCCC	020022	bc3-294	GATTGAACGAAATACCGCT	020022
bc1-295	CAGTTTACTTCCCAGAT	202102	bc2-295	GCCTACTGCGTCAGAAATC	202102	bc3-295	CGACAATCGATAAGCTGCA	202102
bc1-296	TACTGTTGTCGTAGGCT	022200	bc2-296	GTATACCTGAGATGCGACG	022200	bc3-296	ATGTAACTCCTAGACCAGC	022200
bc1-297	ATCCCGAGCACTAGTCC	022020	bc2-297	TGCACGCCAGCTCCTTATA	022020	bc3-297	GTCGGATGTAACACGGTTA	022020
bc1-298	TGCACTCTGTGATCCCG	102022	bc2-298	TATTTCGCTAAACGCCAGT	102022	bc3-298	ATCACCGCCGGAAGCTTGT	102022
bc1-299	TACGTGATTACCTCTGA	210212	bc2-299	TCGTACCCGAATCTAGGTG	210212	bc3-299	ACCGACACTTTAAACCCAG	210212
bc1-300	GACTCGGCCCACATATG	202020	bc2-300	GACTGCCTCATCCGTTGGA	202020	bc3-300	GGTCTCAGATGGTTAATCC	202020
bc1-301	TATCGCCGCAACAGTAC	211022	bc2-301	CAGGTCAAGTTCCTTAGTC	211022	bc3-301	TGATATTGCAGCACGCACT	211022
bc1-302	CGCTAATACAGCAACAT	202021	bc2-302	TACAGAGACCCTATCTAAG	202021	bc3-302	GCTCCCGATTCCTTGATGC	202021
bc1-303	ACGACTACACTTAGACG	020220	bc2-303	CAGCGCATCAATACGTGGT	020220	bc3-303	ACCCTCCGTAGGTCAATTG	020220
bc1-304	GACTTGTGGTACGGGAT	210221	bc2-304	CCGCTTCAGCAATATGCAC	210221	bc3-304	GTGTACGGGCCCTATCAGT	210221
bc1-305	GGACCTGGAAACAGGTT	221112	bc2-305	GGCGTATTCGAATCTATCC	221112	bc3-305	TGTACCCACGACTATTGTC	221112
bc1-306	GGCTAAATATGGCCTTC	110222	bc2-306	ATCTTGCTTTCACCCGTAA	110222	bc3-306	ACCCGTCAGAGTTCGTTGT	110222
bc1-307	GCTCACCAATGCGCATA	212112	bc2-307	GTCAGCTGCTGTACACCTC	212112	bc3-307	TGTCTCCAACCAATGTTTG	212112
bc1-308	TAGTCATGCCCTGACAT	022021	bc2-308	GGTCAGGTTTAAGCCCTTT	022021	bc3-308	ACCAGCCCTTCTGTACAGG	022021
bc1-309	CATGGAAGCGGACTCTA	022201	bc2-309	CACGGGCTATGATATCCCA	022201	bc3-309	GGCCTATAACCAAATCGGC	022201
bc1-310	TGGCAGTAAATGCGTGT	222000	bc2-310	CCGGCTTACAGTAATGTCG	222000	bc3-310	TATGTCAGACAGTCGTAGG	222000
bc1-311	TGACAGGTTCACCTGGC	220102	bc2-311	CGCCACTCATCGATTTCGA	220102	bc3-311	TCGGTCCGATAATCGCTGA	220102
bc1-312	GCATATAACAGCCGAGT	201221	bc2-312	AACGTCAATAGATCACGCC	201221	bc3-312	ACGATTACATGAACGTCCC	201221
bc1-313	ATCCGAAGCTGAAGAAT	010121	bc2-313	AGTAAGGCAGTTCGTGATC	010121	bc3-313	AATGAGACTAGGACTCTCC	010121
bc1-314	CACTTGACACAAAGTAG	020110	bc2-314	CAGAATCCTTTCTGGGTTA	020110	bc3-314	TACCTGGCGCAATTCCACG	020110
bc1-315	ACAGTACACCGCTCATC	011112	bc2-315	TGTAACGTCTACGGGTGTG	011112	bc3-315	TGTCTAGGGATCGTAACAC	011112
bc1-316	GGCGATCGATCCATGAT	012010	bc2-316	ATTTCAGCCTTCCGTAGAA	012010	bc3-316	TACGCCCGTGACAAATGCC	012010
bc1-317	TGTAACTCTAGTTCTCG	020011	bc2-317	GCAAATACTAGGTGCCACT	020011	bc3-317	CTAGAAACCAGCTTGTGTT	020011
bc1-318	CGAAGCTAGTCCTTGGG	201100	bc2-318	TTCGGAGGGATCGCTCGTT	201100	bc3-318	CCGTACCGTACACAAGGTA	201100
bc1-319	TGGAGGCTTCGTAGGAA	100210	bc2-319	GGTAGAACTCGGACGCATT	100210	bc3-319	TCGTCAAGAGTCCACGGTA	100210
bc1-320	TATGCTTGCGTAATCGC	011021	bc2-320	TAAACCATGTGTCTAGCCC	011021	bc3-320	TTGGGCATGTAAACGCTTC	011021
bc1-321	GGAGCTGTCTAATTCCG	100021	bc2-321	GTTATCACTAATCGCGCTT	100021	bc3-321	CAACTTTCGCATGATGGCA	100021
bc1-322	CTAGTTCGGATACATGA	101102	bc2-322	AATGGGTCGAGACCGCAGT	101102	bc3-322	CTCAAAGGGCCCACCATGA	101102
bc1-323	TGTCATGCGGTTTACGG	010002	bc2-323	ATGCGAACCTGGTCCACGT	010002	bc3-323	AGATACACTCGCATTACAC	010002
bc1-324	TAGCGGGCCACGCTTTA	110112	bc2-324	AAGAGACTTTGGATCTTGC	110112	bc3-324	GAACGTGGCCTTCATGACG	110112
bc1-325	AGCTGGAAGGCAGGCTT	000201	bc2-325	ACGCGTGGTCCGCTTACTT	000201	bc3-325	GATTTCAGCAGACTATGGA	000201
bc1-326	AGCTACTCGTTGGAAAT	112001	bc2-326	CTTTATGGGACCTTAAGAC	112001	bc3-326	AAATCGATCCGTGGCTAAG	112001
bc1-327	ACCGATGCCAGATTTAG	001021	bc2-327	AGAATCGGGCTCAACTAAG	001021	bc3-327	TTAGGCCACACTTTGGGTT	001021
bc1-328	AGTGCACCGCAATCGCT	001200	bc2-328	CGCTCACAATGTTTCGGAG	001200	bc3-328	CGTCCAAGATGGGATCCGA	001200
bc1-329	GAGCTGAAGCATGTGCG	001112	bc2-329	TCCATAAGTAATACCCGGC	001112	bc3-329	CACCGCCTTCAGAAATGTG	001112
bc1-330	TTCAGGAACCCTCGAGT	102001	bc2-330	TGAAGTACATGCGGGAGTA	102001	bc3-330	GCGCACGTTGAAATAGAGC	102001
bc1-331	GAACTAATTCCCGAAAG	011210	bc2-331	GGTATACCGTATGGTTCCC	011210	bc3-331	CTAGGTGAGTGTACCGTTT	011210
bc1-332	GAAACTAATGCCTCCGT	001102	bc2-332	TTGCCACTAACTCAGCTCG	001102	bc3-332	TGCCCATCTAAAGCACTTC	001102
bc1-333	CTCATTGGTTTCGCTAC	210011	bc2-333	ACAAGCGGTTCGATTTGTG	210011	bc3-333	TCTGGGAATGCGAAGTCTC	210011
bc1-334	GGCCCATGTTGTACTTC	111200	bc2-334	CCGACTAAGTAGCTCCCAT	111200	bc3-334	CTACGATATCTAACCACGT	111200
bc1-335	ATGCGTCATGTCAAGCT	100201	bc2-335	CTGTAATCCTACGGTCCTT	100201	bc3-335	TGGGAACAATTTCGTCCTA	100201
bc1-336	GAGTCCATGCAAAGCTA	010210	bc2-336	AGCTTGTGGCTAGCTCGTG	010210	bc3-336	CTGAGCCAGAGTCCAGATA	010210
bc1-337	TAATCTGAGAGGATTGC	120001	bc2-337	CCTCTCGAGGGCCCTAATT	120001	bc3-337	TTCCTACGCGACTCTAGCA	120001
bc1-338	CTCCGGATCTTGTCAGA	120100	bc2-338	TGCTCCATCCAGATAGCAA	120100	bc3-338	GCACATTGGACAGAATGGG	120100
bc1-339	GGTAACCTAGACGCGGA	110102	bc2-339	GCAGGTTGATCCGTCGCTA	110102	bc3-339	GGGCGATATCATGGTCAGC	110102
bc1-340	TAGAGTCTACTCGACTA	110120	bc2-340	TGCATTCTCGACAACATCA	110120	bc3-340	GTCGAACGGAACCAAGCTA	110120
bc1-341	ACTGTTAGAAGCTTGCG	012000	bc2-341	GGGTAGTCCATGACCGAAG	012000	bc3-341	CCGGTTGGAGCCATATCGA	012000
bc1-342	CGAAAGTTAGCGGGCAA	101121	bc2-342	CATTGATCTAGTGTCCACC	101121	bc3-342	TGCCTCTTAGATTAGACTC	101121
bc1-343	CGAATGATTTCATGCAC	201010	bc2-343	AGCGGGTGTAGCATATCCA	201010	bc3-343	GAAATGTCGGAGTTAACTG	201010
bc1-344	GGACCCTCTAGAGTTTG	100020	bc2-344	TAACGCTTCTTCTAGAACC	100020	bc3-344	GGGTGAATCACCCAGTAAT	100020
bc1-345	GGTCCACTATGTAGCTG	210100	bc2-345	TTGGGCGAAGTAGCTATTC	210100	bc3-345	CTGGCCAGATTGCATCCAA	210100
bc1-346	ATACTGGTTCAGCCGAA	120010	bc2-346	GTCACCACGACATTGAAGG	120010	bc3-346	GCTTTAGCTGAGAATGCCC	120010
bc1-347	ATTGTCTATTAACCGCG	120101	bc2-347	ACAGGTTATGCGGACAAGT	120101	bc3-347	ATGAGACACGGGCTGGTAA	120101
bc1-348	ATTATGCACGTCGAACC	201011	bc2-348	CGTTCGAGGCCCAGTTTCA	201011	bc3-348	CTAATGTCATTTCGCGGAA	201011
bc1-349	CGCATTTGTGAGCTTCC	010112	bc2-349	TTCGCTATAATCAGCTGAG	010112	bc3-349	CCCTTCATGGTGATTTCAG	010112
bc1-350	TCGAGGCTCGCTAAGGT	112101	bc2-350	GAGCTTTAGTCCGGTCTTA	112101	bc3-350	TGGATTACGTACCTCATTG	112101
bc1-351	ATTCTGAAGCCTACTCG	111002	bc2-351	CGTTATCTTGACGTAAGAG	111002	bc3-351	TCACCGCACGAGTGCATTA	111002
bc1-352	AACTGCCTACCGCGCTA	102101	bc2-352	AAGGGTCGGCTAACGTTGC	102101	bc3-352	GCTACTATCGATTTACGGG	102101
bc1-353	TTGAAGCAAGAACGCTA	112000	bc2-353	CCTCCTCGATAGTCTACTG	112000	bc3-353	AGCGACTTGACAATACTGG	112000
bc1-354	TATCCAGAAACGCTATC	002011	bc2-354	ACCCTGTTCCTTCGTGAAT	002011	bc3-354	CGGACTACTCACCCTTGGT	002011
bc1-355	ATCCAGCTGAAACCGCA	101012	bc2-355	ACCTGCTGTTCTCGACTGC	101012	bc3-355	TGATGAACCGAAGGCACGT	101012
bc1-356	CGTCCTACTACAAGTGG	002010	bc2-356	TCATCAGCGTGTTCGCTCA	002010	bc3-356	GCTTACCGAAAGTGCAGGT	002010
bc1-357	GGTTCTAGGTAGAAACG	020111	bc2-357	GACTTCATATGCGTCCTAA	020111	bc3-357	CGTCAGGAGCCGATAAACT	020111
bc1-358	TACATGTTTACTCGCCA	002110	bc2-358	GCGCGTAAACTCAGTAAAG	002110	bc3-358	ATCGCGGTTGTCCCATTTC	002110
bc1-359	TACGCCGCCTCATTTCG	121100	bc2-359	CAAGAGGTCTGTTCATTGC	121100	bc3-359	ATTGTGCGGTCAGGATGAT	121100
bc1-360	TTCACGTCGAGCAAATA	002101	bc2-360	ACGCGATCAAGCTTTGGGT	002101	bc3-360	TCAGGACGCAGGAATGCAT	002101
bc1-361	TACGATGTGCGCTGATA	100121	bc2-361	GCAAGTGCGTATTAGTCGG	100121	bc3-361	AGAATATCGTGGGCACGTT	100121
bc1-362	TCCAGAGCTATGGATAG	211001	bc2-362	GTCAATGGCTTGCACGCCT	211001	bc3-362	ACGATTCGTCCGTTAGGGT	211001
bc1-363	GGCATCGACAGCAATGA	011121	bc2-363	GACATCTAATACCCAGCTT	011121	bc3-363	CCAGAATATTCAACCTCGA	011121
bc1-364	ACTTCGTTATCACGGGA	001020	bc2-364	ATCACATTGATGGCGAGAA	001020	bc3-364	AAGGATACAGCTAATGTGG	001020
bc1-365	TGAGAGCGCTGTTAGTC	002000	bc2-365	CATTGCTGGTGCCATTCCT	002000	bc3-365	AGAGTCCTTTGGTTACTAG	002000
bc1-366	AAGTTACGACTGCAGAT	021111	bc2-366	TGGGTCCAGCGTTGTGAAA	021111	bc3-366	TAGCAAACGGTCGGTACAC	021111
bc1-367	AGCATGAGAACATGTAG	110020	bc2-367	GCTCATTAATAGGGTGCCA	110020	bc3-367	CCAGTAGAGTGGAGCTACG	110020
bc1-368	ATAGAGCCACCCGAGTA	111020	bc2-368	CGTGCGGATATGTAAACCC	111020	bc3-368	ACCAGTAGTTGGCGAGACT	111020
bc1-369	CGCTGCATTCGATTGTG	121011	bc2-369	GTACGGAACATCGGGTGAC	121011	bc3-369	CGAAATAACTACCAGTTCG	121011
bc1-370	CGAGTAAAGGTTCAACA	211011	bc2-370	TTAGCGTTCGGAGTAATCC	211011	bc3-370	AGGTACCAGAGTCTAGAGT	211011
bc1-371	TATTCGTCTCAATTGCG	210001	bc2-371	GAGTCTTGGCCATTACGCG	210001	bc3-371	TACAGCCGCCGAGTATAGG	210001
bc1-372	AAGCTTTACAACGTGGG	011012	bc2-372	GTCCTAAATGACTGCGGTA	011012	bc3-372	AGGTGGAACACCACATAGC	011012
bc1-373	GTACAGAGAAGTGATGC	010201	bc2-373	ATTACTGTGAAGCTCGCTG	010201	bc3-373	AGTGCCACAGTGCCGCAAT	010201
bc1-374	TAGGCGTTTCAGGTGTT	200101	bc2-374	ATTTGTACGATACGCGTCT	200101	bc3-374	ACAGTACCTTTGCAAGGAA	200101
bc1-375	GACTAGGGACATGAAGG	121101	bc2-375	GACCGGATCCTGGGTCATT	121101	bc3-375	GACGAGGTGACGCATCTAA	121101
bc1-376	TACGCGACCGAATCCAG	201110	bc2-376	AATATGAGCCTAGCGCTTC	201110	bc3-376	ATGCTACAACGGAGTATAG	201110
bc1-377	AATTGACGCTGTATACC	210110	bc2-377	CAGTTGTTCCAAACCATTG	210110	bc3-377	AGGCGCAGTCTTTGGTAAG	210110
bc1-378	TCTTGTAGAATCGTACC	201111	bc2-378	GTCACGAGCGAGTTTACCC	201111	bc3-378	ACTGTCTTATTGGTACCCA	201111
bc1-379	AGTAACACAGAGGAGTG	021010	bc2-379	ATTCAGTAGGGCAGTACCT	021010	bc3-379	CACCAGCATGTGGGCTAAC	021010
bc1-380	TCCTGTAAATGTCTGCA	100112	bc2-380	CAGCCGTTGGTCCAAGTAT	100112	bc3-380	ACGCTAGCGGTGAATCGAA	100112
bc1-381	TCGTTCAACAGATGTGG	010200	bc2-381	GCCAATCCCACCTTAGTTG	010200	bc3-381	CCTATTAGACCGGTAGTCA	010200
bc1-382	GCATTCTACGATGTCAT	111210	bc2-382	TGCAAGAGACCGTTAATGA	111210	bc3-382	TGGAATAGCGACGCACGTT	111210
bc1-383	TCTGGATCAGGGAGATG	101200	bc2-383	AAGGTCCTCACGTTTCACT	101200	bc3-383	GCCAACATCCCAACGATGG	101200
bc1-384	TGTTGACATTCGCCAAT	000210	bc2-384	TATGTACGGCTGGCACCTT	000210	bc3-384	ATGCCTCTGCCTTATCACG	000210

## Sheet: Supplementary Data 2
Supplementary Data 1. List of all spatial transcriptomic datasets and quality control metrics in this study, related to Fig. 2.
NCBI GEO: ​(Shared :https://www.ncbi.nlm.nih.gov/geo/query/acc.cgi?acc=GSE316789 token: wlyryikopnunzkp)
Platform	Sample	Title of Shared BioProject in NCBI	Accession of Shared BioProject in NCBI	Resolution	Final Valid Reads	Reads Mapped to Genome	Sequencing Saturation	Median Genes per SupSpot	Median UMI Counts per SupSpot	Number of SupSpots	N50	Mean Qscore
NGS	Tomato-pepper graft	Tomato-pepper graft spatial transcriptome (NGS)	GSM9460277	30 μm	0.8093	0.8566	0.9124	332	525	20128	150	30
TGS	Tomato-pepper graft	Tomato-pepper graft spatial transcriptome (TGS)	GSM9460278	30 μm	0.559	0.5753	0.7329	269	329	18956	526	17.2
NGS	Mouse	Mouse embryo spatial gene expression (Illumina)	GSM9460279	20 μm	0.9299	0.9737	0.5598	2084	4168	85188	150	30
TGS	Mouse	Mouse embryo spatial gene expression (Nanopore)	GSM9460280	20 μm	0.4139	0.899	0.4481	200	233	84564	772	12.6

## Sheet: Supplementary Data 3
Supplementary Data 2. Cell type annotations using established marker genes of Tomato-pepper graft, related to Fig. 2.
Tissue	CellType	GeneID	GeneName	References
Tomoto	cambium	Solyc02g072240	CESA4	Kumar, M., Atanassov, I. & Turner, S. Functional Analysis of Cellulose Synthase (CESA) Protein Class Specificity. Plant Physiol 173, 970-983 (2017).
Tomoto		Solyc10g076830	LAC22	Schuetz, M. et al. Laccases direct lignification in the discrete secondary cell wall domains of protoxylem. Plant Physiol 166, 798-807 (2014).
Tomoto	callus	Solyc02g072190	WRKY13	Wang, H., Chen, W., Xu, Z., Chen, M. & Yu, D. Functions of WRKYs in plant growth and development. Trends Plant Sci 28, 630-645 (2023).
Tomoto		Solyc05g009410	IPT	Li, K. et al. Expression of AtLEC2 and AtIPTs promotes embryogenic callus formation and shoot regeneration in tobacco. BMC Plant Biol 19, 314 (2019).
Tomoto	xylem	Solyc03g093130	XET	Nishikubo, N. et al. Xyloglucan endo-transglycosylase-mediated xyloglucan rearrangements in developing wood of hybrid aspen. Plant Physiol 155, 399-413 (2011).
Tomoto		Solyc11g008720	BGLU42	Horikoshi, S. et al. Substrate specificity of glycoside hydrolase family 1 beta-glucosidase AtBGlu42 from Arabidopsis thaliana and its molecular mechanism. Biosci Biotechnol Biochem 86, 231-245 (2022).
Tomoto	xylem	Solyc08g066810	GH5	Yuan, T., et al. (2007). Characterization of the endo-β-mannanase gene family in Arabidopsis thaliana.Plant Physiology, 143(3), 1232-1243.
Tomoto		Solyc11g018774	Peroxidase	Marjamaa, K., et al. (2009). The role of xylem class III peroxidases in lignification. Journal of Experimental Botany, 60(2), 367-376.
Tomoto	vascular tissue	Solyc11g011730	SAUR36	Hou, K., et al. (2013). SAUR36, a SMALL AUXIN UP RNA Gene, Is Involved in the Promotion of Leaf Senescence in Arabidopsis.Plant Physiology.
Tomoto		Solyc01g066850	MtN21	Limpens, E. et al. cell- and tissue-specific transcriptome analyses of Medicago truncatula root nodules. PLoS One 8, e64377 (2013).
Tomoto	vascular tissue	Solyc06g065410	VND7	Kubo, M., et al. (2005). "Transcription switches for protoxylem and metaxylem vessel formation." Genes & Development, 19(16), 1855-1860.
Tomoto		Solyc10g084120	PIP2A	Prado, K., et al. (2013). "Regulation of Arabidopsis leaf hydraulics involves light-dependent phosphorylation of aquaporins in veins." The Plant Cell, 25(3), 1029-1039.
Tomoto	epidermis	Solyc08g044260	WAX2	Chen, X., Goodwin, S.M., Boroff, V.L., Liu, X. & Jenks, M.A. Cloning and characterization of the WAX2 gene of Arabidopsis involved in cuticle membrane and wax production. Plant Cell 15, 1170-85 (2003).
Tomoto		Solyc06g064820	GDSL	Campoli, C. et al. A GDSL-motif Esterase/Lipase Affects Wax and Cutin Deposition and Controls Hull-Caryopsis Attachment in Barley. Plant Cell Physiol 65, 999-1013 (2024).
Tomoto	cortex	Solyc12g009290	SAUR37	Wang, W. et al. Genome-wide identification of the SAUR gene family and screening for SmSAURs involved in root development in Salvia miltiorrhiza. Plant Cell Rep 43, 165 (2024).
Tomoto		Solyc07g051820	CSLH1	Bao, J. et al. The knockout of ClaCSLH1 induced dwarfing in watermelon. Theor Appl Genet 138, 120 (2025).
Tomoto	pith	Solyc06g065050	LEA1	Hernandez-Sanchez, I.E. et al. LEAfing through literature: late embryogenesis abundant proteins coming of age-achievements and perspectives. J Exp Bot 73, 6525-6546 (2022).
Tomoto		Solyc02g084850	TAS14	Muñoz-Mayor, A., et al. (2012). "Overexpression of dehydrin TAS14 reduces the osmotic potential of the root and enhances the osmotic stress resistance in tomato." Physiologia Plantarum, 145(4), 542-556.
Pepper	cambium	LOC107840545	LAX2	Fabregas, N. et al. Auxin influx carriers control vascular patterning and xylem differentiation in Arabidopsis thaliana. PLoS Genet 11, e1005183 (2015).
Pepper		LOC107869432	TMO6	Smit, M.E. et al. A PXY-Mediated Transcriptional Network Integrates Signaling Mechanisms to Control Vascular Development in Arabidopsis. Plant Cell 32, 319-335 (2020).
Pepper	xylem	LOC107866094	PER5	Meents, P., et al. (2018). Lignin Polymerization in the Cell Wall. Plant Physiology.
Pepper		LOC107861445	CASP1	Roppolo, D., et al. (2011). A novel protein family mediates Casparian strip formation in the endodermis. Nature.
Pepper	xylem	LOC107865838	WAT1	Ranocha, P., et al. (2010). Walls Are Thin 1 (WAT1), an Arabidopsis homolog of Medicago truncatula NODULIN21, is a tonoplast-localized transporter essential for secondary wall formation in fibers. The Plant Journal.
Pepper		LOC107842330	PLD	Gardiner, J., et al. (2001). Phospholipase Ddelta is associated with microtubules and is involved in the response to water stress. Plant Cell.
Pepper	xylem	LOC107859261	CESA8	Abbas, M. et al. Involvement of CesA4, CesA7-A/B and CesA8-A/B in secondary wall formation in Populus trichocarpa wood. Tree Physiol 40, 73-89 (2020).
Pepper		LOC107874832	NAC037	Yamaguchi, M. et al. VND-INTERACTING2, a NAC domain transcription factor, negatively regulates xylem vessel formation in Arabidopsis. Plant Cell 22, 1249-63 (2010).
Pepper	Phloem	LOC107858469	PP2A9	Dinant, S. et al. Diversity of the superfamily of phloem lectins (phloem protein 2) in angiosperms. Plant Physiol 131, 114-28 (2003).
Pepper		LOC107867825	SUC2	Srivastava, A.C., Ganesan, S., Ismail, I.O. & Ayre, B.G. Functional characterization of the Arabidopsis AtSUC2 Sucrose/H+ symporter by tissue-specific complementation reveals an essential role in phloem loading but not in long-distance transport. Plant Physiol 148, 200-11 (2008).
Pepper	callus	LOC107879278	WIN1	Ikeuchi, M. et al. Wounding Triggers Callus Formation via Dynamic Hormonal and Transcriptional Changes. Plant Physiol 175, 1158-1174 (2017).
Pepper		LOC107862768	PI-2	Kernan, A. & Thornburg, R.W. Auxin Levels Regulate the Expression of a Wound-Inducible Proteinase Inhibitor II-Chloramphenicol Acetyl Transferase Gene Fusion in Vitro and in Vivo. Plant Physiol 91, 73-8 (1989).
Pepper	cortical parenchyma	LOC107878709	HEL	Tuteja, N. Plant DNA helicases: the long unwinding road. J Exp Bot 54, 2201-14 (2003).
Pepper		LOC107877005	D1	Liu, Y. et al. Genome-scale identification of plant defensin (PDF) family genes and molecular characterization of their responses to diverse nutrient stresses in allotetraploid rapeseed. PeerJ 9, e12007 (2021).
Pepper	pith	LOC107842408	BAM9	David, L.C. et al. BETA-AMYLASE9 is a plastidial nonenzymatic regulator of leaf starch degradation. Plant Physiol 188, 191-207 (2022).
Pepper		LOC107862462	KUA1	Lu, D., Wang, T., Persson, S., Mueller-Roeber, B. & Schippers, J.H. Transcriptional control of ROS homeostasis by KUODA1 regulates cell expansion during leaf development. Nat Commun 5, 3767 (2014).

## Sheet: Supplementary Data 4
Supplementary Data 3. Cell type annotations using established marker genes of Mouse embryo, related to Fig. 2.
Tissue	CellType	GeneName	References
Mouse	Excitatory_Neuron	Slc17a7	Tran, M.N. et al. Single-nucleus transcriptome analysis reveals cell-type-specific molecular signatures across reward circuitry in the human brain. Neuron 109, 3088-3103 e5 (2021).
Mouse	Excitatory_Neuron	Camk2a	Yasuda, R., Hayashi, Y. & Hell, J.W. CaMKII: a central molecular organizer of synaptic plasticity, learning and memory. Nat Rev Neurosci 23, 666-682 (2022).
Mouse	Excitatory_Neuron	Satb2	Huang, Y. et al. Expression of transcription factor Satb2 in adult mouse brain. Anat Rec (Hoboken) 296, 452-61 (2013).
Mouse	Inhibitory_Neuron	Pvalb	Caillard, O. et al. Role of the calcium-binding protein parvalbumin in short-term synaptic plasticity. Proc Natl Acad Sci U S A 97, 13372-7 (2000).
Mouse	Astrocyte	Aqp4	Ikeshima-Kataoka, H. Neuroimmunological Implications of AQP4 in Astrocytes. Int J Mol Sci 17(2016).
Mouse	Astrocyte	Gfap	Bignami, A., Eng, L.F., Dahl, D. & Uyeda, C.T. Localization of the glial fibrillary acidic protein in astrocytes by immunofluorescence. Brain Res 43, 429-35 (1972).
Mouse	Astrocyte	Slc1a2	Tanaka, K. et al. Epilepsy and exacerbation of brain injury in mice lacking the glutamate transporter GLT-1. Science 276, 1699-702 (1997).
Mouse	Oligodendrocyte	Mbp	Baumann, N. & Pham-Dinh, D. Biology of oligodendrocyte and myelin in the mammalian central nervous system. Physiol Rev 81, 871-927 (2001).
Mouse	Oligodendrocyte	Mog	Scolding, N.J. et al. Myelin-oligodendrocyte glycoprotein (MOG) is a surface marker of oligodendrocyte maturation. J Neuroimmunol 22, 169-76 (1989).
Mouse	Oligodendrocyte	Plp1	Kim, D., An, H., Fan, C. & Park, Y. Identifying oligodendrocyte enhancers governing Plp1 expression. Hum Mol Genet 30, 2225-2239 (2021).
Mouse	OPC	Pdgfra	Zheng, K. et al. Molecular and Genetic Evidence for the PDGFRalpha-Independent Population of Oligodendrocyte Progenitor Cells in the Developing Mouse Brain. J Neurosci 38, 9505-9513 (2018).
Mouse	OPC	Cspg4	Schiffer, D. et al. The Significance of Chondroitin Sulfate Proteoglycan 4 (CSPG4) in Human Gliomas. Int J Mol Sci 19(2018).
Mouse	Microglia	P2ry12	Lin, S.S., Tang, Y., Illes, P. & Verkhratsky, A. The Safeguarding Microglia: Central Role for P2Y(12) Receptors. Front Pharmacol 11, 627760 (2020).
Mouse	Microglia	Cx3cr1	Wolf, Y., Yona, S., Kim, K.W. & Jung, S. Microglia, seen from the CX3CR1 angle. Front Cell Neurosci 7, 26 (2013).
Mouse	Microglia	Trem2	Wang, S. et al. TREM2 drives microglia response to amyloid-beta via SYK-dependent and -independent pathways. Cell 185, 4153-4169 e19 (2022).
Mouse	Endothelial	Pecam1	Woodfin, A., Voisin, M.B. & Nourshargh, S. PECAM-1: a multi-functional molecule in inflammation and vascular biology. Arterioscler Thromb Vasc Biol 27, 2514-23 (2007).
Mouse	Endothelial	Kdr	Patterson, C. et al. Cloning and functional analysis of the promoter for KDR/flk-1, a receptor for vascular endothelial growth factor. J Biol Chem 270, 23111-8 (1995).
Mouse	Endothelial	Klf2	Sangwung, P. et al. KLF2 and KLF4 control endothelial identity and vascular integrity. JCI Insight 2, e91700 (2017).
Mouse	Endothelial	Flt1	Gille, H. et al. Analysis of biological effects and signaling properties of Flt-1 (VEGFR-1) and KDR (VEGFR-2). A reassessment using novel receptor-specific vascular endothelial growth factor mutants. J Biol Chem 276, 3222-30 (2001).
Mouse	Pericyte	Pdgfrb	Winkler, E.A., Bell, R.D. & Zlokovic, B.V. Pericyte-specific expression of PDGF beta receptor in mouse models with normal and deficient PDGF beta receptor signaling. Mol Neurodegener 5, 32 (2010).
Mouse	Pericyte	Rgs5	Lu, G. et al. RGS5 as a Biomarker of Pericytes, Involvement in Vascular Remodeling and Pulmonary Arterial Hypertension. Vasc Health Risk Manag 19, 673-688 (2023).
Mouse	Pericyte	Acta2	Whitesell, T.R. et al. An alpha-smooth muscle actin (acta2/alphasma) zebrafish transgenic line marking vascular mural cells and visceral smooth muscle cells. PLoS One 9, e90590 (2014).
Mouse	Ependymal	Foxj1	Jacquet, B.V. et al. FoxJ1-dependent gene expression is required for differentiation of radial glia into ependymal cells and a subset of astrocytes in the postnatal brain. Development 136, 4021-31 (2009).
Mouse	Ependymal	Ttr	Montecinos, H.A., Richter, H., Caprile, T. & Rodriguez, E.M. Synthesis of transthyretin by the ependymal cells of the subcommissural organ. Cell Tissue Res 320, 487-99 (2005).

## Sheet: Supplementary Data 5
Supplementary Data 4. Classification and quantification of transcripts detected in mouse and plant graft, related to Fig. 3.
Species	Gene ID	Isoform ID	Structural Category	Length (bp)	Full-length Read Count
Mouse	ENSMUSG00000052305	ENSMUST00000023934	full-splice_match	628	560288
Mouse	ENSMUSG00000073940	ENSMUST00000098192	full-splice_match	703	181315
Mouse	ENSMUSG00000064341	ENSMUST00000082392	full-splice_match	957	170716
Mouse	ENSMUSG00000052305	transcript21502.7.nnic	novel_in_catalog	409	103096
Mouse	ENSMUSG00000037742	ENSMUST00000042235	full-splice_match	1794	80510
Mouse	ENSMUSG00000049775	ENSMUST00000112172	full-splice_match	768	70374
Mouse	ENSMUSG00000107176	ENSMUST00000202370	full-splice_match	423	69535
Mouse	ENSMUSG00000086583	ENSMUST00000071641	full-splice_match	1019	69191
Mouse	ENSMUSG00000072235	transcript12096.15.nnic	novel_not_in_catalog	1135	63228
Mouse	ENSMUSG00000081051	ENSMUST00000117288	full-splice_match	531	59445
Mouse	ENSMUSG00000067870	ENSMUST00000181935	full-splice_match	378	58285
Mouse	ENSMUSG00000078193	ENSMUST00000102782	full-splice_match	445	57682
Mouse	ENSMUSG00000064370	ENSMUST00000082421	full-splice_match	1144	56255
Mouse	ENSMUSG00000057841	ENSMUST00000081840	full-splice_match	517	54167
Mouse	ENSMUSG00000064345	ENSMUST00000082396	full-splice_match	1038	49832
Mouse	ENSMUSG00000001506	transcript18596.11.nnic	novel_not_in_catalog	724	48765
Mouse	ENSMUSG00000057036	ENSMUST00000077389	full-splice_match	444	48447
Mouse	ENSMUSG00000064363	ENSMUST00000082414	full-splice_match	1378	47810
Mouse	novelGene_ENSMUSG00000076236_AS	transcript8292.13.nnic	antisense	494	46213
Mouse	ENSMUSG00000052305	transcript21453.7.nnic	novel_not_in_catalog	300	43678
Mouse	ENSMUSG00000026043	transcript3171.1.nnic	novel_not_in_catalog	991	41727
Mouse	ENSMUSG00000084416	ENSMUST00000120360	full-splice_match	654	41038
Mouse	ENSMUSG00000029661	transcript130.6.nnic	novel_not_in_catalog	1514	40538
Mouse	novelGene_ENSMUSG00000084319_AS	transcript10568.6.nnic	antisense	783	40070
Mouse	novelGene_ENSMUSG00000064370_AS	transcript791.MT.nnic	antisense	609	39134
Mouse	ENSMUSG00000039001	ENSMUST00000059080	full-splice_match	394	37734
Mouse	ENSMUSG00000027523	ENSMUST00000109084	full-splice_match	1695	37244
Mouse	ENSMUSG00000049775	ENSMUST00000112176	full-splice_match	698	36961
Mouse	ENSMUSG00000080848	ENSMUST00000117563	full-splice_match	472	36275
Mouse	ENSMUSG00000068396	ENSMUST00000121998	full-splice_match	354	36198
Mouse	ENSMUSG00000018593	transcript7746.11.nnic	novel_not_in_catalog	679	33388
Mouse	ENSMUSG00000063457	ENSMUST00000068408	full-splice_match	500	32413
Mouse	ENSMUSG00000050299	transcript8036.16.nnic	genic	662	31515
Mouse	ENSMUSG00000024661	ENSMUST00000025563	full-splice_match	866	29614
Mouse	ENSMUSG00000105388	ENSMUST00000197973	full-splice_match	321	26746
Mouse	ENSMUSG00000012848	ENSMUST00000004554	full-splice_match	761	26321
Mouse	ENSMUSG00000020908	ENSMUST00000108689	full-splice_match	6031	26213
Mouse	ENSMUSG00000059775	ENSMUST00000077208	full-splice_match	449	25518
Mouse	ENSMUSG00000062353	ENSMUST00000118533	full-splice_match	438	25397
Mouse	ENSMUSG00000027750	transcript3285.3.nnic	novel_not_in_catalog	1444	25001
Mouse	ENSMUSG00000029580	transcript19421.5.nnic	novel_not_in_catalog	971	24332
Mouse	ENSMUSG00000016252	ENSMUST00000016396	full-splice_match	421	24190
Mouse	ENSMUSG00000070343	ENSMUST00000084614	full-splice_match	537	24143
Mouse	novelGene_ENSMUSG00000047676_AS	transcript16413.3.nnic	antisense	996	23971
Mouse	ENSMUSG00000000031	ENSMUST00000228514	full-splice_match	1178	23668
Mouse	ENSMUSG00000031972	transcript18110.8.nnic	novel_not_in_catalog	471	22441
Mouse	ENSMUSG00000003429	ENSMUST00000003521	full-splice_match	661	22081
Mouse	ENSMUSG00000036438	ENSMUST00000040440	full-splice_match	1205	21739
Mouse	ENSMUSG00000028936	ENSMUST00000142735	full-splice_match	581	21013
Mouse	ENSMUSG00000014313	ENSMUST00000153512	full-splice_match	738	20956
Mouse	novelGene_ENSMUSG00000047676_AS	transcript16304.3.nnic	antisense	1166	20707
Mouse	novelGene_ENSMUSG00000027750_AS	transcript3330.3.nnic	antisense	481	20028
Mouse	ENSMUSG00000023944	ENSMUST00000024739	full-splice_match	2520	19775
Mouse	ENSMUSG00000029306	ENSMUST00000031246	full-splice_match	2068	19472
Mouse	ENSMUSG00000056201	ENSMUST00000116560	full-splice_match	1148	18881
Mouse	ENSMUSG00000024608	ENSMUST00000025511	full-splice_match	683	18809
Mouse	ENSMUSG00000026385	ENSMUST00000027634	full-splice_match	569	18686
Mouse	ENSMUSG00000003970	ENSMUST00000229183	full-splice_match	1020	18656
Mouse	ENSMUSG00000020267	ENSMUST00000020504	full-splice_match	636	18503
Mouse	ENSMUSG00000063882	ENSMUST00000078676	full-splice_match	547	18484
Mouse	novelGene_ENSMUSG00000001525_AS	transcript10631.17.nnic	antisense	718	18292
Mouse	ENSMUSG00000014313	ENSMUST00000014457	full-splice_match	503	18048
Mouse	ENSMUSG00000083621	ENSMUST00000119571	full-splice_match	408	17625
Mouse	ENSMUSG00000031972	ENSMUST00000034453	full-splice_match	1446	17231
Mouse	ENSMUSG00000021087	ENSMUST00000150156	full-splice_match	1428	17177
Mouse	ENSMUSG00000017300	ENSMUST00000103095	full-splice_match	700	17157
Mouse	ENSMUSG00000081406	ENSMUST00000118499	full-splice_match	750	16594
Mouse	ENSMUSG00000035885	ENSMUST00000039758	full-splice_match	545	16333
Mouse	ENSMUSG00000021910	transcript3175.14.nic	incomplete-splice_match	1543	15818
Mouse	novelGene_728	transcript31396.7.nnic	intergenic	703	15802
Mouse	ENSMUSG00000021290	ENSMUST00000021719	full-splice_match	366	15595
Mouse	ENSMUSG00000030672	ENSMUST00000032910	full-splice_match	766	15514
Mouse	ENSMUSG00000068614	ENSMUST00000090269	full-splice_match	1473	15448
Mouse	ENSMUSG00000034994	ENSMUST00000047864	full-splice_match	3089	15285
Mouse	ENSMUSG00000049124	ENSMUST00000053575	full-splice_match	386	15274
Mouse	ENSMUSG00000004980	ENSMUST00000114459	full-splice_match	1728	14993
Mouse	ENSMUSG00000030744	transcript19144.7.nnic	novel_not_in_catalog	1003	14762
Mouse	ENSMUSG00000046721	ENSMUST00000026901	full-splice_match	653	14690
Mouse	ENSMUSG00000095597	ENSMUST00000178147	full-splice_match	651	14620
Mouse	ENSMUSG00000072235	ENSMUST00000097014	full-splice_match	1803	14493
Mouse	ENSMUSG00000006728	transcript14427.10.nnic	novel_not_in_catalog	523	14467
Mouse	ENSMUSG00000018293	ENSMUST00000018437	full-splice_match	861	14086
Mouse	ENSMUSG00000020427	ENSMUST00000020702	full-splice_match	2421	13938
Mouse	ENSMUSG00000019874	ENSMUST00000020024	full-splice_match	804	13874
Mouse	ENSMUSG00000050299	ENSMUST00000052867	full-splice_match	402	13804
Mouse	novelGene_ENSMUSG00000036305_AS	transcript14031.15.nnic	antisense	576	13318
Mouse	ENSMUSG00000027828	transcript4230.3.nnic	novel_not_in_catalog	1164	13179
Mouse	ENSMUSG00000069972	ENSMUST00000182017	full-splice_match	453	13052
Mouse	ENSMUSG00000034024	ENSMUST00000047672	full-splice_match	1959	12940
Mouse	ENSMUSG00000018770	ENSMUST00000111996	full-splice_match	723	12920
Mouse	ENSMUSG00000048583	transcript31516.7.nnic	novel_not_in_catalog	497	12720
Mouse	ENSMUSG00000004980	transcript5019.6.nnic	novel_not_in_catalog	605	12621
Mouse	ENSMUSG00000032231	ENSMUST00000034756	full-splice_match	1447	12488
Mouse	ENSMUSG00000026728	ENSMUST00000028062	full-splice_match	2193	12274
Mouse	ENSMUSG00000025428	ENSMUST00000026495	full-splice_match	2471	11972
Mouse	ENSMUSG00000019761	ENSMUST00000103131	full-splice_match	2094	11870
Mouse	ENSMUSG00000041697	ENSMUST00000040154	full-splice_match	571	11708
Mouse	ENSMUSG00000069682	ENSMUST00000092620	full-splice_match	635	11668
Mouse	novelGene_ENSMUSG00000042834_AS	transcript1942.18.nnic	antisense	1258	11554
Mouse	ENSMUSG00000001506	transcript18692.11.nnic	novel_not_in_catalog	473	11531
Mouse	ENSMUSG00000026193	ENSMUST00000188894	full-splice_match	8043	11445
Mouse	ENSMUSG00000020163	ENSMUST00000020372	full-splice_match	445	11379
Mouse	ENSMUSG00000041571	ENSMUST00000044355	full-splice_match	736	11281
Mouse	ENSMUSG00000040785	ENSMUST00000117648	full-splice_match	7415	11024
Mouse	ENSMUSG00000044627	ENSMUST00000113397	full-splice_match	580	11004
Mouse	ENSMUSG00000019505	ENSMUST00000019649	full-splice_match	1499	10998
Mouse	ENSMUSG00000020372	ENSMUST00000139959	full-splice_match	1542	10976
Mouse	ENSMUSG00000032330	ENSMUST00000034881	full-splice_match	659	10974
Mouse	ENSMUSG00000008348	transcript14884.5.nnic	novel_not_in_catalog	989	10909
Mouse	ENSMUSG00000026728	ENSMUST00000193675	full-splice_match	1777	10887
Mouse	ENSMUSG00000107383	transcript23244.7.nnic	genic	1222	10869
Mouse	ENSMUSG00000110841	ENSMUST00000217344	full-splice_match	782	10856
Mouse	ENSMUSG00000050856	ENSMUST00000049628	full-splice_match	371	10725
Mouse	ENSMUSG00000031231	ENSMUST00000155377	full-splice_match	526	10684
Mouse	ENSMUSG00000018326	ENSMUST00000018470	full-splice_match	3013	10623
Mouse	ENSMUSG00000035674	ENSMUST00000148403	full-splice_match	343	10608
Mouse	ENSMUSG00000020585	ENSMUST00000020909	full-splice_match	1773	10557
Mouse	ENSMUSG00000026878	ENSMUST00000113025	full-splice_match	4346	10362
Mouse	ENSMUSG00000038690	ENSMUST00000161741	full-splice_match	955	10342
Mouse	ENSMUSG00000050621	ENSMUST00000053150	full-splice_match	374	10216
Mouse	ENSMUSG00000060419	transcript15207.5.nnic	genic	530	10207
Mouse	ENSMUSG00000063229	ENSMUST00000210815	full-splice_match	1535	10141
Mouse	ENSMUSG00000024038	ENSMUST00000064798	full-splice_match	485	9981
Mouse	novelGene_ENSMUSG00000115302_AS	transcript31574.7.nnic	antisense	1011	9935
Mouse	ENSMUSG00000068240	ENSMUST00000089430	full-splice_match	504	9894
Mouse	ENSMUSG00000029767	ENSMUST00000031779	full-splice_match	3229	9893
Mouse	ENSMUSG00000027447	ENSMUST00000028938	full-splice_match	860	9840
Mouse	ENSMUSG00000001525	transcript10490.17.nnic	novel_not_in_catalog	1586	9706
Mouse	ENSMUSG00000054428	ENSMUST00000067496	full-splice_match	539	9701
Mouse	ENSMUSG00000068220	ENSMUST00000229159	full-splice_match	628	9699
Mouse	novelGene_ENSMUSG00000045690_AS	transcript5874.12.nnic	antisense	388	9690
Mouse	ENSMUSG00000106106	ENSMUST00000198477	full-splice_match	1849	9621
Mouse	novelGene_ENSMUSG00000063632_AS	transcript1876.12.nnic	antisense	1103	9604
Mouse	ENSMUSG00000030672	ENSMUST00000206772	full-splice_match	653	9587
Mouse	ENSMUSG00000020458	ENSMUST00000060992	full-splice_match	1773	9549
Mouse	ENSMUSG00000030672	transcript25773.7.nnic	novel_not_in_catalog	911	9482
Mouse	ENSMUSG00000037664	transcript31875.7.nic	incomplete-splice_match	1648	9463
Mouse	ENSMUSG00000030695	ENSMUST00000087566	full-splice_match	1549	9415
Mouse	novelGene_1046	transcript14744.11.nnic	intergenic	1250	9383
Mouse	ENSMUSG00000003970	ENSMUST00000004072	full-splice_match	851	9345
Mouse	ENSMUSG00000047139	ENSMUST00000058714	full-splice_match	1816	9300
Mouse	ENSMUSG00000020496	transcript8167.11.nnic	novel_not_in_catalog	164	9204
Mouse	ENSMUSG00000090841	ENSMUST00000218127	full-splice_match	691	9180
Mouse	novelGene_ENSMUSG00000029580_AS	transcript19599.5.nnic	antisense	214	9145
Mouse	ENSMUSG00000019505	transcript9778.11.nnic	novel_not_in_catalog	1044	9073
Mouse	ENSMUSG00000022450	ENSMUST00000023085	full-splice_match	590	9050
Mouse	ENSMUSG00000022354	ENSMUST00000022980	full-splice_match	704	9019
Mouse	ENSMUSG00000016319	ENSMUST00000016463	full-splice_match	1240	8961
Mouse	ENSMUSG00000018593	ENSMUST00000108858	full-splice_match	2115	8960
Mouse	ENSMUSG00000045763	transcript1086.15.nnic	novel_not_in_catalog	1057	8930
Mouse	ENSMUSG00000113902	ENSMUST00000221422	full-splice_match	861	8926
Mouse	ENSMUSG00000063856	ENSMUST00000082429	full-splice_match	1072	8759
Mouse	ENSMUSG00000029838	ENSMUST00000101534	full-splice_match	1614	8707
Mouse	ENSMUSG00000033938	ENSMUST00000036996	full-splice_match	623	8662
Mouse	ENSMUSG00000018451	ENSMUST00000156068	full-splice_match	1494	8648
Mouse	novelGene_ENSMUSG00000084349_AS	transcript995.X.nnic	antisense	1118	8616
Mouse	novelGene_ENSMUSG00000064370_AS	transcript833.MT.nnic	antisense	471	8595
Mouse	ENSMUSG00000049751	ENSMUST00000054544	full-splice_match	526	8591
Mouse	ENSMUSG00000036446	ENSMUST00000038160	full-splice_match	2448	8587
Mouse	ENSMUSG00000027581	ENSMUST00000103045	full-splice_match	1136	8523
Mouse	ENSMUSG00000060572	ENSMUST00000071977	full-splice_match	1073	8475
Mouse	ENSMUSG00000053317	ENSMUST00000065678	full-splice_match	564	8434
Mouse	ENSMUSG00000001175	transcript8893.12.nnic	novel_not_in_catalog	1548	8372
Mouse	ENSMUSG00000036275	ENSMUST00000109057	full-splice_match	2472	8348
Mouse	ENSMUSG00000001289	ENSMUST00000001335	full-splice_match	570	8342
Mouse	ENSMUSG00000058443	ENSMUST00000076364	full-splice_match	768	8332
Mouse	ENSMUSG00000041959	ENSMUST00000045756	full-splice_match	685	8251
Mouse	ENSMUSG00000016427	ENSMUST00000016571	full-splice_match	419	8200
Mouse	ENSMUSG00000030057	transcript9310.6.nnic	novel_not_in_catalog	275	8158
Mouse	ENSMUSG00000039016	ENSMUST00000044051	full-splice_match	518	8135
Mouse	ENSMUSG00000100755	ENSMUST00000116115	full-splice_match	425	8127
Mouse	ENSMUSG00000073616	ENSMUST00000097642	full-splice_match	438	8126
Mouse	novelGene_ENSMUSG00000001506_AS	transcript18725.11.nnic	antisense	400	8120
Mouse	ENSMUSG00000069662	ENSMUST00000092584	full-splice_match	4048	8095
Mouse	ENSMUSG00000010376	ENSMUST00000010520	full-splice_match	824	8026
Mouse	novelGene_ENSMUSG00000093315_AS	transcript9189.19.nnic	antisense	748	8016
Mouse	ENSMUSG00000025290	ENSMUST00000169826	full-splice_match	519	7992
Mouse	ENSMUSG00000059534	ENSMUST00000058407	full-splice_match	434	7916
Mouse	ENSMUSG00000007836	ENSMUST00000007980	full-splice_match	2678	7916
Mouse	ENSMUSG00000022890	transcript8421.16.nic	incomplete-splice_match	1187	7836
Mouse	ENSMUSG00000002416	ENSMUST00000119379	full-splice_match	455	7800
Mouse	ENSMUSG00000084106	ENSMUST00000120149	full-splice_match	891	7798
Mouse	ENSMUSG00000032294	ENSMUST00000034834	full-splice_match	2432	7770
Mouse	ENSMUSG00000036781	ENSMUST00000040917	full-splice_match	499	7726
Mouse	ENSMUSG00000029223	ENSMUST00000031131	full-splice_match	1177	7623
Mouse	ENSMUSG00000000563	ENSMUST00000133320	full-splice_match	1311	7545
Mouse	ENSMUSG00000032399	ENSMUST00000034966	full-splice_match	1538	7540
Mouse	ENSMUSG00000021546	ENSMUST00000177019	full-splice_match	2626	7536
Mouse	ENSMUSG00000057841	ENSMUST00000203816	full-splice_match	906	7408
Mouse	ENSMUSG00000047459	ENSMUST00000109682	full-splice_match	684	7360
Mouse	novelGene_ENSMUSG00000040856_AS	transcript10083.12.nnic	antisense	562	7358
Mouse	ENSMUSG00000046341	transcript6054.4.nnic	genic	932	7305
Mouse	ENSMUSG00000025130	ENSMUST00000026122	full-splice_match	2861	7259
Mouse	ENSMUSG00000030057	transcript9308.6.nnic	novel_not_in_catalog	357	7113
Mouse	novelGene_ENSMUSG00000065947_AS	transcript232.MT.nnic	antisense	953	7071
Mouse	ENSMUSG00000025393	ENSMUST00000125992	full-splice_match	399	7041
Mouse	ENSMUSG00000025393	ENSMUST00000126751	full-splice_match	478	7013
Mouse	ENSMUSG00000029580	transcript19498.5.nnic	novel_not_in_catalog	729	6911
Mouse	ENSMUSG00000018340	ENSMUST00000102727	full-splice_match	2471	6897
Mouse	ENSMUSG00000032332	ENSMUST00000135009	full-splice_match	1784	6883
Mouse	ENSMUSG00000004207	ENSMUST00000004316	full-splice_match	2654	6855
Mouse	ENSMUSG00000022892	ENSMUST00000005406	full-splice_match	3176	6789
Mouse	ENSMUSG00000093930	ENSMUST00000179869	full-splice_match	3245	6758
Mouse	ENSMUSG00000072772	ENSMUST00000004389	full-splice_match	863	6739
Mouse	ENSMUSG00000001525	ENSMUST00000001566	full-splice_match	2649	6670
Mouse	ENSMUSG00000083992	ENSMUST00000117851	full-splice_match	599	6652
Mouse	ENSMUSG00000041881	ENSMUST00000048249	full-splice_match	528	6611
Mouse	ENSMUSG00000051695	ENSMUST00000053015	full-splice_match	1830	6608
Mouse	ENSMUSG00000078812	ENSMUST00000164359	full-splice_match	1281	6607
Mouse	ENSMUSG00000061032	ENSMUST00000219374	full-splice_match	1852	6594
Mouse	ENSMUSG00000052337	ENSMUST00000207015	full-splice_match	1494	6587
Mouse	ENSMUSG00000058672	transcript2263.13.nnic	novel_not_in_catalog	797	6552
Mouse	ENSMUSG00000031839	ENSMUST00000034300	full-splice_match	1208	6549
Mouse	ENSMUSG00000030399	ENSMUST00000003643	full-splice_match	1235	6534
Mouse	ENSMUSG00000096942	ENSMUST00000181233	full-splice_match	438	6493
Mouse	ENSMUSG00000050224	ENSMUST00000053149	full-splice_match	892	6452
Mouse	ENSMUSG00000106106	transcript11503.17.nnic	genic	446	6417
Mouse	novelGene_ENSMUSG00000001175_AS	transcript8950.12.nnic	antisense	438	6413
Mouse	ENSMUSG00000020719	ENSMUST00000133426	full-splice_match	3593	6377
Mouse	ENSMUSG00000032324	ENSMUST00000034876	full-splice_match	1716	6345
Mouse	ENSMUSG00000037072	ENSMUST00000082437	full-splice_match	1514	6314
Mouse	ENSMUSG00000037852	ENSMUST00000048967	full-splice_match	2117	6304
Mouse	ENSMUSG00000025204	ENSMUST00000026222	full-splice_match	680	6292
Mouse	novelGene_ENSMUSG00000022048_AS	transcript8629.14.nnic	antisense	1431	6291
Mouse	ENSMUSG00000021606	ENSMUST00000022097	full-splice_match	568	6272
Mouse	ENSMUSG00000024740	ENSMUST00000025649	full-splice_match	4155	6271
Mouse	ENSMUSG00000067847	ENSMUST00000088610	full-splice_match	569	6266
Mouse	ENSMUSG00000094483	ENSMUST00000179343	full-splice_match	8319	6246
Mouse	ENSMUSG00000024659	ENSMUST00000025561	full-splice_match	1674	6212
Mouse	ENSMUSG00000030672	ENSMUST00000139613	full-splice_match	285	6209
Mouse	ENSMUSG00000028416	transcript2203.4.nnic	novel_not_in_catalog	1193	6187
Mouse	ENSMUSG00000001506	transcript18723.11.nnic	novel_not_in_catalog	641	6182
Mouse	ENSMUSG00000031633	transcript4280.8.nnic	novel_not_in_catalog	882	6168
Mouse	novelGene_ENSMUSG00000059534_AS	transcript663.11.nnic	antisense	502	6050
Mouse	ENSMUSG00000007872	ENSMUST00000008016	full-splice_match	1278	6000
Mouse	ENSMUSG00000070436	transcript19100.7.nnic	novel_not_in_catalog	805	5996
Mouse	ENSMUSG00000022483	ENSMUST00000088355	full-splice_match	4862	5984
Mouse	ENSMUSG00000032383	ENSMUST00000034947	full-splice_match	892	5982
Mouse	ENSMUSG00000028692	ENSMUST00000030455	full-splice_match	1420	5970
Mouse	ENSMUSG00000040731	ENSMUST00000036125	full-splice_match	2367	5964
Mouse	ENSMUSG00000020402	ENSMUST00000102758	full-splice_match	2022	5922
Mouse	ENSMUSG00000006699	ENSMUST00000051477	full-splice_match	2108	5857
Mouse	ENSMUSG00000025151	ENSMUST00000026142	full-splice_match	2821	5853
Mouse	novelGene_ENSMUSG00000018593_AS	transcript7711.11.nnic	antisense	735	5841
Mouse	novelGene_ENSMUSG00000047945_AS	transcript13137.4.nnic	antisense	892	5824
Mouse	ENSMUSG00000058672	ENSMUST00000056427	full-splice_match	1610	5808
Mouse	ENSMUSG00000015092	ENSMUST00000142288	full-splice_match	710	5756
Mouse	ENSMUSG00000037706	ENSMUST00000037941	full-splice_match	1533	5727
Mouse	ENSMUSG00000002379	ENSMUST00000002452	full-splice_match	545	5726
Mouse	ENSMUSG00000006360	ENSMUST00000006523	full-splice_match	445	5716
Mouse	ENSMUSG00000024091	transcript15916.17.nnic	novel_not_in_catalog	1447	5669
Mouse	novelGene_ENSMUSG00000065947_AS	transcript617.MT.nnic	antisense	298	5665
Mouse	ENSMUSG00000098178	transcript11629.17.nnic	genic	1062	5650
Mouse	ENSMUSG00000030218	ENSMUST00000032342	full-splice_match	617	5646
Mouse	ENSMUSG00000024208	ENSMUST00000025045	full-splice_match	500	5593
Mouse	ENSMUSG00000036371	ENSMUST00000203077	full-splice_match	1617	5571
Mouse	ENSMUSG00000053931	ENSMUST00000029773	full-splice_match	2049	5565
Mouse	ENSMUSG00000055653	ENSMUST00000069360	full-splice_match	2216	5544
Mouse	ENSMUSG00000022285	ENSMUST00000022894	full-splice_match	3288	5539
Mouse	ENSMUSG00000021178	ENSMUST00000021595	full-splice_match	1591	5536
Mouse	ENSMUSG00000037503	ENSMUST00000047534	full-splice_match	5030	5522
Mouse	ENSMUSG00000037152	transcript2966.3.nnic	novel_not_in_catalog	762	5504
Mouse	ENSMUSG00000053332	ENSMUST00000159706	full-splice_match	557	5470
Mouse	ENSMUSG00000028111	ENSMUST00000015664	full-splice_match	1512	5455
Mouse	ENSMUSG00000027483	ENSMUST00000028985	full-splice_match	1106	5422
Mouse	ENSMUSG00000025781	ENSMUST00000114896	full-splice_match	1735	5421
Mouse	novelGene_ENSMUSG00000064339_AS	transcript104.MT.nnic	antisense	817	5421
Mouse	ENSMUSG00000019362	ENSMUST00000019506	full-splice_match	616	5405
Mouse	ENSMUSG00000030647	ENSMUST00000032882	full-splice_match	683	5370
Mouse	ENSMUSG00000035530	ENSMUST00000049385	full-splice_match	1322	5348
Mouse	novelGene_ENSMUSG00000026185_AS	transcript6668.1.nnic	antisense	1470	5331
Mouse	ENSMUSG00000027566	ENSMUST00000029082	full-splice_match	914	5318
Mouse	ENSMUSG00000029066	ENSMUST00000030942	full-splice_match	764	5301
Mouse	ENSMUSG00000044041	transcript20974.11.nnic	novel_not_in_catalog	1212	5297
Mouse	ENSMUSG00000015222	transcript5805.1.nnic	novel_not_in_catalog	990	5272
Mouse	ENSMUSG00000043165	transcript8537.3.nnic	novel_not_in_catalog	423	5255
Mouse	ENSMUSG00000032366	ENSMUST00000113695	full-splice_match	1607	5249
Mouse	ENSMUSG00000023150	ENSMUST00000023918	full-splice_match	3511	5232
Mouse	ENSMUSG00000022956	ENSMUST00000023677	full-splice_match	838	5221
Mouse	ENSMUSG00000028798	ENSMUST00000102593	full-splice_match	1123	5192
Mouse	ENSMUSG00000030695	ENSMUST00000032934	full-splice_match	1511	5156
Mouse	ENSMUSG00000029126	transcript4509.5.nnic	novel_not_in_catalog	895	5146
Mouse	ENSMUSG00000086841	ENSMUST00000131787	full-splice_match	462	5128
Mouse	ENSMUSG00000031059	ENSMUST00000116621	full-splice_match	908	5105
Mouse	novelGene_ENSMUSG00000024501_AS	transcript4031.18.nnic	antisense	601	5060
Mouse	novelGene_ENSMUSG00000068078_AS	transcript8769.16.nnic	antisense	825	5041
Mouse	ENSMUSG00000028639	ENSMUST00000079644	full-splice_match	1628	5039
Mouse	ENSMUSG00000090625	transcript25487.2.nnic	novel_not_in_catalog	437	5008
Mouse	ENSMUSG00000019539	ENSMUST00000211352	full-splice_match	1453	4997
Mouse	ENSMUSG00000001506	ENSMUST00000001547	full-splice_match	5930	4983
Mouse	ENSMUSG00000029632	ENSMUST00000204714	full-splice_match	452	4965
Mouse	ENSMUSG00000070436	transcript19097.7.nnic	novel_not_in_catalog	799	4955
Mouse	ENSMUSG00000017493	transcript20786.11.nnic	novel_not_in_catalog	598	4948
Mouse	ENSMUSG00000020857	ENSMUST00000072566	full-splice_match	734	4920
Mouse	ENSMUSG00000031375	ENSMUST00000033741	full-splice_match	2419	4920
Mouse	ENSMUSG00000064337	ENSMUST00000082388	full-splice_match	955	4913
Mouse	ENSMUSG00000018585	ENSMUST00000108857	full-splice_match	541	4909
Mouse	ENSMUSG00000074578	ENSMUST00000189909	full-splice_match	738	4897
Mouse	ENSMUSG00000030647	transcript18575.7.nnic	novel_not_in_catalog	750	4896
Mouse	ENSMUSG00000096210	ENSMUST00000180086	full-splice_match	2055	4887
Mouse	ENSMUSG00000028530	ENSMUST00000102781	full-splice_match	4906	4874
Mouse	ENSMUSG00000064339	ENSMUST00000082390	full-splice_match	1582	4866
Mouse	ENSMUSG00000024953	ENSMUST00000025904	full-splice_match	1262	4865
Mouse	ENSMUSG00000070394	ENSMUST00000094065	full-splice_match	492	4842
Mouse	novelGene_169	transcript13809.2.nnic	genic_intron	313	4841
Mouse	ENSMUSG00000020372	ENSMUST00000136849	full-splice_match	322	4841
Mouse	ENSMUSG00000019929	ENSMUST00000105287	full-splice_match	1758	4837
Mouse	ENSMUSG00000032314	ENSMUST00000034866	full-splice_match	1392	4835
Mouse	novelGene_ENSMUSG00000023456_AS	transcript13785.6.nnic	antisense	758	4820
Mouse	ENSMUSG00000019179	ENSMUST00000019323	full-splice_match	1456	4801
Mouse	ENSMUSG00000029581	ENSMUST00000031565	full-splice_match	2675	4797
Mouse	ENSMUSG00000024538	ENSMUST00000025419	full-splice_match	1286	4785
Mouse	ENSMUSG00000006998	ENSMUST00000007212	full-splice_match	2961	4783
Mouse	ENSMUSG00000027500	ENSMUST00000029002	full-splice_match	2073	4767
Mouse	ENSMUSG00000028837	ENSMUST00000030642	full-splice_match	859	4759
Mouse	novelGene_ENSMUSG00000023175_AS	transcript7584.10.nnic	antisense	506	4756
Mouse	ENSMUSG00000023092	ENSMUST00000023854	full-splice_match	2356	4714
Mouse	ENSMUSG00000026043	ENSMUST00000087883	full-splice_match	5564	4713
Mouse	ENSMUSG00000030751	ENSMUST00000033008	full-splice_match	1201	4711
Mouse	ENSMUSG00000007564	ENSMUST00000007708	full-splice_match	2410	4680
Mouse	ENSMUSG00000005873	ENSMUST00000006027	full-splice_match	2894	4651
Mouse	novelGene_ENSMUSG00000069662_AS	transcript2684.10.nnic	antisense	398	4649
Mouse	ENSMUSG00000025351	ENSMUST00000105229	full-splice_match	1043	4640
Mouse	ENSMUSG00000000088	ENSMUST00000000090	full-splice_match	645	4610
Mouse	ENSMUSG00000057388	ENSMUST00000079121	full-splice_match	1219	4608
Mouse	ENSMUSG00000104960	ENSMUST00000196466	full-splice_match	448	4574
Mouse	ENSMUSG00000029309	ENSMUST00000031249	full-splice_match	2759	4572
Mouse	ENSMUSG00000028618	ENSMUST00000030361	full-splice_match	1775	4551
Mouse	ENSMUSG00000036752	ENSMUST00000043584	full-splice_match	1598	4539
Mouse	ENSMUSG00000032458	ENSMUST00000035033	full-splice_match	3050	4532
Mouse	ENSMUSG00000006728	ENSMUST00000140254	full-splice_match	2038	4528
Mouse	ENSMUSG00000029447	transcript15275.5.nnic	novel_not_in_catalog	2547	4525
Mouse	ENSMUSG00000078348	ENSMUST00000105139	full-splice_match	3841	4491
Mouse	ENSMUSG00000054428	ENSMUST00000152993	full-splice_match	462	4487
Mouse	ENSMUSG00000015090	ENSMUST00000114251	full-splice_match	830	4469
Mouse	ENSMUSG00000009549	ENSMUST00000009693	full-splice_match	798	4466
Mouse	ENSMUSG00000027712	ENSMUST00000029266	full-splice_match	1731	4465
Mouse	ENSMUSG00000064352	transcript455.MT.nnic	genic	1087	4451
Mouse	ENSMUSG00000032002	transcript235.9.nnic	genic	298	4443
Mouse	ENSMUSG00000080921	ENSMUST00000117356	full-splice_match	213	4441
Mouse	ENSMUSG00000032562	ENSMUST00000055704	full-splice_match	2215	4418
Mouse	ENSMUSG00000060591	ENSMUST00000081649	full-splice_match	655	4407
Mouse	ENSMUSG00000038871	transcript2461.6.nnic	novel_not_in_catalog	1395	4397
Mouse	ENSMUSG00000030122	ENSMUST00000203422	full-splice_match	585	4374
Mouse	ENSMUSG00000030082	ENSMUST00000032168	full-splice_match	3172	4360
Mouse	ENSMUSG00000022186	ENSMUST00000110690	full-splice_match	3527	4337
Mouse	ENSMUSG00000031246	ENSMUST00000033598	full-splice_match	2882	4335
Mouse	ENSMUSG00000072692	ENSMUST00000201888	full-splice_match	408	4331
Mouse	ENSMUSG00000031097	ENSMUST00000105971	full-splice_match	732	4331
Mouse	ENSMUSG00000090136	ENSMUST00000160052	full-splice_match	444	4329
Mouse	ENSMUSG00000062078	ENSMUST00000042296	full-splice_match	6737	4320
Mouse	ENSMUSG00000008036	ENSMUST00000086112	full-splice_match	836	4315
Mouse	ENSMUSG00000027406	ENSMUST00000028892	full-splice_match	1616	4309
Mouse	ENSMUSG00000029465	ENSMUST00000102525	full-splice_match	899	4302
Mouse	ENSMUSG00000059208	ENSMUST00000234893	full-splice_match	591	4300
Mouse	ENSMUSG00000028843	ENSMUST00000030651	full-splice_match	743	4299
Mouse	ENSMUSG00000003072	ENSMUST00000003156	full-splice_match	931	4291
Mouse	ENSMUSG00000004044	transcript21948.11.nnic	novel_not_in_catalog	1171	4281
Mouse	ENSMUSG00000027248	transcript15363.2.nnic	novel_not_in_catalog	748	4278
Mouse	ENSMUSG00000020857	ENSMUST00000021217	full-splice_match	1012	4277
Mouse	ENSMUSG00000079111	ENSMUST00000110731	full-splice_match	1829	4273
Mouse	ENSMUSG00000018286	ENSMUST00000018430	full-splice_match	798	4269
Mouse	ENSMUSG00000006941	ENSMUST00000007139	full-splice_match	1035	4246
Mouse	ENSMUSG00000025967	transcript5361.1.nnic	novel_not_in_catalog	982	4241
Mouse	ENSMUSG00000026547	ENSMUST00000111230	full-splice_match	1586	4228
Mouse	ENSMUSG00000020849	transcript14381.11.nic	novel_in_catalog	1745	4222
Mouse	ENSMUSG00000041355	ENSMUST00000035785	full-splice_match	1189	4209
Mouse	ENSMUSG00000029580	ENSMUST00000100497	full-splice_match	1920	4201
Mouse	ENSMUSG00000039323	ENSMUST00000120564	full-splice_match	991	4197
Mouse	ENSMUSG00000093674	ENSMUST00000177163	full-splice_match	544	4197
Mouse	ENSMUSG00000020719	transcript24519.11.nnic	novel_not_in_catalog	1195	4193
Mouse	ENSMUSG00000024758	ENSMUST00000025667	full-splice_match	2841	4186
Mouse	ENSMUSG00000006333	transcript431.7.nic	novel_in_catalog	865	4175
Mouse	ENSMUSG00000001833	ENSMUST00000165594	full-splice_match	2516	4172
Mouse	ENSMUSG00000060600	ENSMUST00000108548	full-splice_match	1564	4160
Mouse	ENSMUSG00000044894	ENSMUST00000109021	full-splice_match	405	4159
Mouse	ENSMUSG00000003970	transcript6230.15.nnic	novel_not_in_catalog	692	4159
Mouse	ENSMUSG00000020849	ENSMUST00000067664	full-splice_match	2100	4128
Mouse	ENSMUSG00000027239	ENSMUST00000069423	full-splice_match	773	4125
Mouse	ENSMUSG00000003072	ENSMUST00000105366	full-splice_match	781	4122
Mouse	ENSMUSG00000022139	ENSMUST00000088419	full-splice_match	4552	4114
Mouse	ENSMUSG00000022816	ENSMUST00000114763	full-splice_match	3789	4114
Mouse	ENSMUSG00000075702	ENSMUST00000094469	full-splice_match	707	4111
Mouse	novelGene_ENSMUSG00000026185_AS	transcript6657.1.nnic	antisense	1102	4106
Mouse	ENSMUSG00000029661	transcript303.6.nnic	novel_not_in_catalog	747	4102
Mouse	ENSMUSG00000042750	ENSMUST00000049130	full-splice_match	903	4058
Mouse	ENSMUSG00000022174	ENSMUST00000022781	full-splice_match	878	4028
Mouse	ENSMUSG00000042712	ENSMUST00000113115	full-splice_match	888	4025
Mouse	ENSMUSG00000080848	transcript18294.9.nnic	genic	687	4018
Mouse	ENSMUSG00000061086	ENSMUST00000106956	full-splice_match	900	4001
Mouse	ENSMUSG00000027239	ENSMUST00000111309	full-splice_match	771	3997
Mouse	ENSMUSG00000026879	ENSMUST00000028239	full-splice_match	2653	3994
Mouse	ENSMUSG00000007892_ENSMUSG00000032254	transcript8436.9.nnic	fusion	667	3994
Mouse	ENSMUSG00000022043	ENSMUST00000022623	full-splice_match	3678	3992
Mouse	ENSMUSG00000037373	ENSMUST00000079746	full-splice_match	2279	3985
Mouse	ENSMUSG00000026032	ENSMUST00000027193	full-splice_match	763	3968
Mouse	ENSMUSG00000042737	ENSMUST00000040824	full-splice_match	404	3944
Mouse	ENSMUSG00000021643	ENSMUST00000022145	full-splice_match	601	3938
Mouse	ENSMUSG00000018567	ENSMUST00000018711	full-splice_match	1351	3918
Mouse	ENSMUSG00000027828	ENSMUST00000029414	full-splice_match	2957	3912
Mouse	ENSMUSG00000074748	ENSMUST00000099276	full-splice_match	3566	3903
Mouse	ENSMUSG00000019877	ENSMUST00000020027	full-splice_match	2880	3902
Mouse	ENSMUSG00000021268	ENSMUST00000143847	full-splice_match	706	3899
Mouse	ENSMUSG00000022462	transcript11259.15.nnic	novel_not_in_catalog	989	3894
Mouse	ENSMUSG00000042043	ENSMUST00000046644	full-splice_match	559	3883
Mouse	ENSMUSG00000018707	ENSMUST00000018851	full-splice_match	14342	3840
Mouse	ENSMUSG00000006333	ENSMUST00000006496	full-splice_match	751	3836
Mouse	ENSMUSG00000028044	ENSMUST00000029679	full-splice_match	849	3816
Mouse	ENSMUSG00000031996	ENSMUST00000216921	full-splice_match	1877	3814
Mouse	ENSMUSG00000029064	ENSMUST00000105616	full-splice_match	3088	3812
Mouse	ENSMUSG00000025868	ENSMUST00000026986	full-splice_match	648	3788
Mouse	novelGene_ENSMUSG00000061527_AS	transcript13242.15.nnic	antisense	683	3786
Mouse	novelGene_ENSMUSG00000032966_AS	transcript19464.2.nnic	antisense	989	3775
Mouse	ENSMUSG00000030189	transcript15586.6.nnic	novel_not_in_catalog	943	3766
Mouse	ENSMUSG00000055093	ENSMUST00000119780	full-splice_match	471	3760
Mouse	ENSMUSG00000029992	ENSMUST00000113658	full-splice_match	6238	3758
Mouse	ENSMUSG00000032412	ENSMUST00000034983	full-splice_match	1994	3755
Mouse	ENSMUSG00000066705	ENSMUST00000217381	full-splice_match	1789	3755
Mouse	ENSMUSG00000024598	ENSMUST00000025497	full-splice_match	10480	3755
Mouse	ENSMUSG00000030208	transcript15932.6.nnic	novel_not_in_catalog	1434	3749
Mouse	ENSMUSG00000031760	ENSMUST00000034211	full-splice_match	536	3742
Mouse	ENSMUSG00000020536	ENSMUST00000108719	full-splice_match	4268	3729
Mouse	ENSMUSG00000020612	ENSMUST00000049527	full-splice_match	3359	3728
Mouse	ENSMUSG00000022982	ENSMUST00000023707	full-splice_match	641	3725
Mouse	ENSMUSG00000007041	ENSMUST00000007257	full-splice_match	1466	3723
Mouse	ENSMUSG00000054146	ENSMUST00000107411	full-splice_match	1700	3709
Mouse	ENSMUSG00000028478	ENSMUST00000107851	full-splice_match	1135	3696
Mouse	ENSMUSG00000054405	transcript14745.4.nnic	novel_not_in_catalog	1164	3690
Mouse	ENSMUSG00000030470	ENSMUST00000032658	full-splice_match	877	3687
Mouse	ENSMUSG00000041936	ENSMUST00000105574	full-splice_match	7193	3686
Mouse	ENSMUSG00000017466	ENSMUST00000017610	full-splice_match	3709	3675
Mouse	ENSMUSG00000063882	ENSMUST00000142468	full-splice_match	423	3655
Mouse	ENSMUSG00000026750	ENSMUST00000028083	full-splice_match	1160	3654
Mouse	ENSMUSG00000031765	ENSMUST00000034215	full-splice_match	549	3642
Mouse	ENSMUSG00000000031	ENSMUST00000136359	full-splice_match	2286	3632
Mouse	ENSMUSG00000018001	ENSMUST00000116456	full-splice_match	3738	3626
Mouse	ENSMUSG00000049960	ENSMUST00000224286	full-splice_match	801	3606
Mouse	ENSMUSG00000004285	ENSMUST00000004396	full-splice_match	703	3595
Mouse	ENSMUSG00000020088	ENSMUST00000020285	full-splice_match	2613	3593
Mouse	ENSMUSG00000029649	transcript20986.5.nnic	novel_not_in_catalog	858	3587
Mouse	ENSMUSG00000031517	ENSMUST00000033915	full-splice_match	3215	3582
Mouse	ENSMUSG00000061816	ENSMUST00000119429	full-splice_match	803	3578
Mouse	ENSMUSG00000056895	ENSMUST00000078267	full-splice_match	614	3578
Mouse	ENSMUSG00000052727	ENSMUST00000064762	full-splice_match	11808	3571
Mouse	ENSMUSG00000025268	ENSMUST00000145342	full-splice_match	2572	3557
Mouse	ENSMUSG00000032199	ENSMUST00000034720	full-splice_match	2200	3554
Mouse	ENSMUSG00000068823	ENSMUST00000029446	full-splice_match	4318	3526
Mouse	ENSMUSG00000024097	ENSMUST00000063417	full-splice_match	2288	3524
Mouse	ENSMUSG00000027422	ENSMUST00000154649	full-splice_match	1048	3514
Mouse	ENSMUSG00000052957	ENSMUST00000065086	full-splice_match	2961	3511
Mouse	ENSMUSG00000073676	ENSMUST00000075242	full-splice_match	774	3500
Mouse	novelGene_ENSMUSG00000064370_AS	transcript805.MT.nnic	antisense	151	3500
Mouse	ENSMUSG00000036504	ENSMUST00000039156	full-splice_match	937	3494
Mouse	ENSMUSG00000027620	ENSMUST00000029149	full-splice_match	2711	3485
Mouse	novelGene_ENSMUSG00000021497_AS	transcript5957.13.nnic	antisense	390	3479
Mouse	ENSMUSG00000020149	ENSMUST00000109601	full-splice_match	1200	3477
Mouse	ENSMUSG00000063787	ENSMUST00000071215	full-splice_match	616	3455
Mouse	ENSMUSG00000074129	ENSMUST00000150350	full-splice_match	1047	3454
Mouse	ENSMUSG00000090553	ENSMUST00000166915	full-splice_match	503	3450
Mouse	ENSMUSG00000052738	ENSMUST00000064740	full-splice_match	1519	3449
Mouse	ENSMUSG00000006304	ENSMUST00000113820	full-splice_match	1439	3447
Mouse	ENSMUSG00000021670	ENSMUST00000022176	full-splice_match	4425	3447
Mouse	ENSMUSG00000026895	ENSMUST00000070112	full-splice_match	861	3438
Mouse	ENSMUSG00000050953	ENSMUST00000068581	full-splice_match	3071	3435
Mouse	ENSMUSG00000075279	ENSMUST00000173086	full-splice_match	580	3432
Mouse	ENSMUSG00000029223	ENSMUST00000176015	full-splice_match	980	3426
Mouse	ENSMUSG00000032118	ENSMUST00000034630	full-splice_match	1794	3425
Mouse	ENSMUSG00000024603	ENSMUST00000025505	full-splice_match	3738	3421
Mouse	ENSMUSG00000032336	transcript7820.9.nnic	novel_not_in_catalog	1820	3418
Mouse	ENSMUSG00000029169	transcript5240.5.nnic	novel_not_in_catalog	1068	3413
Mouse	ENSMUSG00000019054	ENSMUST00000019198	full-splice_match	786	3409
Mouse	ENSMUSG00000071547	ENSMUST00000227690	full-splice_match	737	3408
Mouse	ENSMUSG00000041598	ENSMUST00000053536	full-splice_match	3008	3402
Mouse	ENSMUSG00000060450	ENSMUST00000170811	full-splice_match	2886	3399
Mouse	ENSMUSG00000022108	ENSMUST00000022704	full-splice_match	1796	3395
Mouse	ENSMUSG00000020297	ENSMUST00000020537	full-splice_match	2239	3393
Mouse	ENSMUSG00000028609	ENSMUST00000030348	full-splice_match	692	3388
Mouse	ENSMUSG00000021737	ENSMUST00000022256	full-splice_match	1387	3369
Mouse	ENSMUSG00000041773	ENSMUST00000041623	full-splice_match	4737	3367
Mouse	ENSMUSG00000020321	transcript2513.11.nnic	novel_not_in_catalog	1061	3366
Mouse	ENSMUSG00000025151	ENSMUST00000138146	full-splice_match	1278	3366
Mouse	ENSMUSG00000005054	ENSMUST00000005185	full-splice_match	603	3361
Mouse	ENSMUSG00000001025	ENSMUST00000001051	full-splice_match	731	3358
Mouse	ENSMUSG00000001473	ENSMUST00000001513	full-splice_match	1757	3353
Mouse	ENSMUSG00000027805	transcript3784.3.nnic	novel_not_in_catalog	1206	3341
Mouse	ENSMUSG00000026426	ENSMUST00000027684	full-splice_match	1713	3336
Mouse	ENSMUSG00000028063	ENSMUST00000029699	full-splice_match	3156	3332
Mouse	ENSMUSG00000052428	ENSMUST00000195015	full-splice_match	1573	3330
Mouse	ENSMUSG00000027012	ENSMUST00000112144	full-splice_match	2565	3315
Mouse	ENSMUSG00000006356	ENSMUST00000084882	full-splice_match	1439	3309
Mouse	ENSMUSG00000020029	ENSMUST00000020217	full-splice_match	3210	3305
Mouse	ENSMUSG00000045983	ENSMUST00000115463	full-splice_match	5378	3305
Mouse	novelGene_ENSMUSG00000052727_AS	transcript10116.13.nnic	antisense	1069	3304
Mouse	ENSMUSG00000047945	ENSMUST00000062356	full-splice_match	1605	3299
Mouse	ENSMUSG00000071561	ENSMUST00000096089	full-splice_match	619	3299
Mouse	ENSMUSG00000050953	transcript4014.10.nnic	novel_not_in_catalog	683	3280
Mouse	ENSMUSG00000005683	ENSMUST00000005826	full-splice_match	2926	3279
Mouse	ENSMUSG00000047261	transcript6553.16.nnic	novel_not_in_catalog	766	3277
Mouse	ENSMUSG00000005506	ENSMUST00000111451	full-splice_match	4678	3276
Mouse	ENSMUSG00000010406	ENSMUST00000010550	full-splice_match	418	3276
Mouse	ENSMUSG00000084786	ENSMUST00000160682	full-splice_match	489	3270
Mouse	ENSMUSG00000024012	transcript6593.17.nnic	novel_not_in_catalog	1353	3267
Mouse	ENSMUSG00000029761	ENSMUST00000115021	full-splice_match	4041	3266
Mouse	ENSMUSG00000040048	ENSMUST00000045602	full-splice_match	732	3261
Mouse	ENSMUSG00000003814	transcript10148.8.nnic	novel_not_in_catalog	410	3255
Mouse	ENSMUSG00000050732	ENSMUST00000059983	full-splice_match	820	3252
Mouse	ENSMUSG00000028419	ENSMUST00000030128	full-splice_match	1519	3241
Mouse	ENSMUSG00000000563	transcript11783.3.nic	incomplete-splice_match	1228	3239
Mouse	ENSMUSG00000020737	ENSMUST00000021083	full-splice_match	1375	3237
Mouse	ENSMUSG00000001729	ENSMUST00000001780	full-splice_match	2690	3214
Mouse	ENSMUSG00000052833	ENSMUST00000094815	full-splice_match	1875	3210
Mouse	ENSMUSG00000005397	ENSMUST00000005532	full-splice_match	6091	3207
Mouse	ENSMUSG00000069833	ENSMUST00000092956	full-splice_match	18099	3200
Mouse	ENSMUSG00000024853	transcript1815.19.nic	incomplete-splice_match	1965	3198
Mouse	ENSMUSG00000018217	ENSMUST00000018361	full-splice_match	1800	3180
Mouse	ENSMUSG00000033020	ENSMUST00000230271	full-splice_match	885	3174
Mouse	ENSMUSG00000042462	ENSMUST00000035276	full-splice_match	676	3172
Mouse	ENSMUSG00000032330	ENSMUST00000215933	full-splice_match	477	3170
Mouse	ENSMUSG00000052374	ENSMUST00000064204	full-splice_match	3013	3168
Mouse	ENSMUSG00000027087	ENSMUST00000131192	full-splice_match	463	3148
Mouse	ENSMUSG00000051234	ENSMUST00000057500	full-splice_match	1232	3148
Mouse	ENSMUSG00000061904	ENSMUST00000170810	full-splice_match	1341	3142
Mouse	ENSMUSG00000040549	ENSMUST00000111338	full-splice_match	6665	3137
Mouse	ENSMUSG00000002741	ENSMUST00000002818	full-splice_match	2541	3131
Mouse	ENSMUSG00000017737	ENSMUST00000017881	full-splice_match	3175	3124
Mouse	ENSMUSG00000054091	ENSMUST00000106429	full-splice_match	1160	3122
Mouse	ENSMUSG00000034880	ENSMUST00000048914	full-splice_match	607	3120
Mouse	ENSMUSG00000025613	transcript8585.16.nic	novel_in_catalog	1745	3112
Mouse	novelGene_ENSMUSG00000025130_AS	transcript29248.11.nnic	antisense	363	3110
Mouse	ENSMUSG00000029426	ENSMUST00000031377	full-splice_match	4698	3104
Mouse	ENSMUSG00000021614	ENSMUST00000109546	full-splice_match	12427	3103
Mouse	ENSMUSG00000090247	ENSMUST00000026405	full-splice_match	550	3098
Mouse	ENSMUSG00000020917	ENSMUST00000107389	full-splice_match	4426	3091
Mouse	ENSMUSG00000012848	ENSMUST00000139349	full-splice_match	1248	3077
Mouse	ENSMUSG00000031762	ENSMUST00000034214	full-splice_match	511	3074
Mouse	ENSMUSG00000025950	ENSMUST00000097709	full-splice_match	2302	3066
Mouse	ENSMUSG00000020869	ENSMUST00000021239	full-splice_match	2837	3064
Mouse	ENSMUSG00000024576	ENSMUST00000165721	full-splice_match	2323	3059
Mouse	ENSMUSG00000007656	ENSMUST00000170308	full-splice_match	429	3058
Mouse	ENSMUSG00000019494	ENSMUST00000110951	full-splice_match	1098	3048
Mouse	ENSMUSG00000031765	transcript11823.8.nnic	novel_not_in_catalog	780	3048
Mouse	ENSMUSG00000097195	ENSMUST00000183045	full-splice_match	614	3043
Mouse	novelGene_ENSMUSG00000022010_AS	transcript10058.14.nnic	antisense	923	3043
Mouse	ENSMUSG00000072692	ENSMUST00000100847	full-splice_match	682	3032
Mouse	ENSMUSG00000019804	ENSMUST00000105499	full-splice_match	1057	3021
Mouse	ENSMUSG00000031422	transcript8450.X.nnic	novel_not_in_catalog	903	3019
Mouse	ENSMUSG00000096145	ENSMUST00000033074	full-splice_match	748	3011
Mouse	ENSMUSG00000020297	transcript3615.11.nnic	novel_not_in_catalog	1279	3006
Mouse	ENSMUSG00000037361	ENSMUST00000218650	full-splice_match	455	3006
Mouse	ENSMUSG00000019818	ENSMUST00000019962	full-splice_match	2922	3001
Mouse	ENSMUSG00000025488	ENSMUST00000026561	full-splice_match	360	3000
Mouse	ENSMUSG00000059734	transcript180.19.nnic	novel_not_in_catalog	830	2999
Mouse	ENSMUSG00000042712	ENSMUST00000048687	full-splice_match	1019	2997
Mouse	ENSMUSG00000034252	ENSMUST00000175758	full-splice_match	1445	2994
Mouse	ENSMUSG00000092072	ENSMUST00000170669	full-splice_match	429	2991
Mouse	ENSMUSG00000059119	ENSMUST00000208190	full-splice_match	2259	2989
Mouse	ENSMUSG00000062929	ENSMUST00000221374	full-splice_match	1128	2987
Mouse	ENSMUSG00000028639	ENSMUST00000127737	full-splice_match	1054	2986
Mouse	ENSMUSG00000040385	ENSMUST00000046094	full-splice_match	1379	2986
Mouse	ENSMUSG00000028849	ENSMUST00000106132	full-splice_match	3195	2981
Mouse	ENSMUSG00000001403	ENSMUST00000088248	full-splice_match	967	2978
Mouse	ENSMUSG00000030654	ENSMUST00000032888	full-splice_match	2171	2978
Mouse	ENSMUSG00000031740	ENSMUST00000034187	full-splice_match	3078	2968
Mouse	novelGene_ENSMUSG00000022816_AS	transcript6064.16.nnic	antisense	352	2957
Mouse	ENSMUSG00000002900	transcript2156.12.nnic	novel_not_in_catalog	926	2954
Mouse	ENSMUSG00000023064	ENSMUST00000023826	full-splice_match	852	2952
Mouse	ENSMUSG00000053192	transcript9632.3.nnic	novel_not_in_catalog	273	2951
Mouse	ENSMUSG00000030876	ENSMUST00000033163	full-splice_match	1823	2942
Mouse	ENSMUSG00000018339	ENSMUST00000082430	full-splice_match	1594	2941
Mouse	ENSMUSG00000031696	ENSMUST00000034131	full-splice_match	3474	2940
Mouse	ENSMUSG00000022816	transcript6071.16.nnic	novel_not_in_catalog	1017	2940
Mouse	ENSMUSG00000070544	ENSMUST00000109468	full-splice_match	3856	2936
Mouse	ENSMUSG00000028266	ENSMUST00000120539	full-splice_match	1669	2936
Mouse	ENSMUSG00000030536	ENSMUST00000167377	full-splice_match	7444	2934
Mouse	ENSMUSG00000046841	ENSMUST00000053871	full-splice_match	3089	2934
Mouse	ENSMUSG00000037242	ENSMUST00000037099	full-splice_match	4119	2927
Mouse	ENSMUSG00000027861	ENSMUST00000029454	full-splice_match	2556	2923
Mouse	ENSMUSG00000025651	ENSMUST00000026743	full-splice_match	1653	2922
Mouse	ENSMUSG00000029616	ENSMUST00000052590	full-splice_match	1123	2921
Mouse	ENSMUSG00000038991	transcript3114.13.nnic	novel_not_in_catalog	1485	2921
Mouse	ENSMUSG00000051579	ENSMUST00000060101	full-splice_match	1250	2918
Mouse	ENSMUSG00000023089	ENSMUST00000023851	full-splice_match	875	2904
Mouse	ENSMUSG00000041959	transcript8919.3.nnic	novel_not_in_catalog	882	2895
Mouse	ENSMUSG00000019961	ENSMUST00000072239	full-splice_match	3533	2894
Mouse	ENSMUSG00000058603	ENSMUST00000121497	full-splice_match	414	2893
Mouse	ENSMUSG00000056820	ENSMUST00000075896	full-splice_match	2391	2892
Mouse	ENSMUSG00000051855	ENSMUST00000163949	full-splice_match	2561	2888
Mouse	ENSMUSG00000019428	ENSMUST00000075491	full-splice_match	1698	2885
Mouse	ENSMUSG00000039771	ENSMUST00000041366	full-splice_match	646	2881
Mouse	ENSMUSG00000021127	ENSMUST00000021552	full-splice_match	2990	2881
Mouse	ENSMUSG00000020780	ENSMUST00000021133	full-splice_match	2526	2873
Mouse	ENSMUSG00000008475	ENSMUST00000097536	full-splice_match	1737	2872
Mouse	ENSMUSG00000053560	ENSMUST00000060427	full-splice_match	1522	2872
Mouse	ENSMUSG00000020644	ENSMUST00000020974	full-splice_match	1270	2870
Mouse	ENSMUSG00000032291	ENSMUST00000034830	full-splice_match	802	2866
Mouse	ENSMUSG00000028249	ENSMUST00000103008	full-splice_match	2086	2859
Mouse	ENSMUSG00000004665	transcript7861.10.nnic	novel_in_catalog	1535	2858
Mouse	ENSMUSG00000033186	ENSMUST00000042662	full-splice_match	2240	2850
Mouse	ENSMUSG00000027602	ENSMUST00000154596	full-splice_match	826	2841
Mouse	ENSMUSG00000019923	ENSMUST00000020081	full-splice_match	1834	2841
Mouse	ENSMUSG00000028517	ENSMUST00000064139	full-splice_match	3159	2836
Mouse	ENSMUSG00000028556	ENSMUST00000206128	full-splice_match	1507	2834
Mouse	ENSMUSG00000036880	ENSMUST00000041053	full-splice_match	1515	2834
Mouse	ENSMUSG00000023939	ENSMUST00000024734	full-splice_match	645	2831
Mouse	ENSMUSG00000028478	ENSMUST00000107845	full-splice_match	1031	2825
Mouse	ENSMUSG00000015575	ENSMUST00000015719	full-splice_match	794	2824
Mouse	ENSMUSG00000020458	transcript3328.11.nnic	novel_not_in_catalog	731	2823
Mouse	ENSMUSG00000028063	ENSMUST00000120377	full-splice_match	2021	2817
Mouse	ENSMUSG00000019254	ENSMUST00000013886	full-splice_match	2983	2817
Mouse	ENSMUSG00000031029	transcript22040.7.nnic	novel_not_in_catalog	1038	2813
Mouse	novelGene_ENSMUSG00000029838_AS	transcript2872.6.nnic	antisense	199	2809
Mouse	ENSMUSG00000079428	transcript8078.X.nnic	novel_not_in_catalog	1104	2807
Mouse	ENSMUSG00000029110	ENSMUST00000030992	full-splice_match	2895	2800
Mouse	ENSMUSG00000029328	ENSMUST00000128187	full-splice_match	2752	2795
Mouse	ENSMUSG00000024844	ENSMUST00000025762	full-splice_match	735	2790
Mouse	ENSMUSG00000007039	ENSMUST00000007255	full-splice_match	1342	2785
Mouse	ENSMUSG00000020674	transcript2048.12.nnic	novel_not_in_catalog	1886	2771
Mouse	ENSMUSG00000029718	ENSMUST00000146589	full-splice_match	555	2765
Mouse	ENSMUSG00000048076	ENSMUST00000163300	full-splice_match	1991	2760
Mouse	ENSMUSG00000022370	ENSMUST00000172387	full-splice_match	1223	2760
Mouse	ENSMUSG00000054312	ENSMUST00000067298	full-splice_match	488	2755
Mouse	ENSMUSG00000050148	ENSMUST00000060714	full-splice_match	3344	2751
Mouse	ENSMUSG00000028234	ENSMUST00000138502	full-splice_match	3706	2740
Mouse	ENSMUSG00000000346	ENSMUST00000000356	full-splice_match	2135	2734
Mouse	ENSMUSG00000037266	ENSMUST00000154837	full-splice_match	734	2731
Mouse	ENSMUSG00000053565	ENSMUST00000066070	full-splice_match	774	2726
Mouse	ENSMUSG00000076432	ENSMUST00000135088	full-splice_match	2197	2724
Mouse	ENSMUSG00000050578	ENSMUST00000015394	full-splice_match	2673	2721
Mouse	ENSMUSG00000029247	ENSMUST00000031160	full-splice_match	2482	2717
Mouse	ENSMUSG00000051853	transcript11671.15.nnic	novel_not_in_catalog	1423	2717
Mouse	ENSMUSG00000024083	ENSMUST00000172818	full-splice_match	4740	2709
Mouse	ENSMUSG00000090223	ENSMUST00000061739	full-splice_match	641	2708
Mouse	ENSMUSG00000036256	ENSMUST00000046746	full-splice_match	1116	2705
Mouse	ENSMUSG00000037815	ENSMUST00000042345	full-splice_match	3698	2705
Mouse	ENSMUSG00000023236	ENSMUST00000024005	full-splice_match	1208	2704
Mouse	ENSMUSG00000000088	ENSMUST00000213678	full-splice_match	1818	2696
Mouse	ENSMUSG00000022044	ENSMUST00000121955	full-splice_match	1361	2694
Mouse	ENSMUSG00000038014	ENSMUST00000060805	full-splice_match	5105	2692
Mouse	ENSMUSG00000067818	ENSMUST00000088552	full-splice_match	1128	2689
Mouse	ENSMUSG00000019179	transcript16974.5.nnic	novel_not_in_catalog	348	2687
Mouse	ENSMUSG00000029781	transcript5594.6.nnic	novel_not_in_catalog	823	2683
Mouse	ENSMUSG00000033436	ENSMUST00000119010	full-splice_match	3007	2682
Mouse	ENSMUSG00000022246	transcript567.15.nic	incomplete-splice_match	2024	2677
Mouse	ENSMUSG00000078429	transcript14288.10.nnic	novel_not_in_catalog	774	2676
Mouse	ENSMUSG00000058833	ENSMUST00000135773	full-splice_match	725	2674
Mouse	ENSMUSG00000020152	ENSMUST00000000137	full-splice_match	3631	2668
Mouse	ENSMUSG00000026278	ENSMUST00000027499	full-splice_match	1468	2667
Mouse	novelGene_ENSMUSG00000022285_AS	transcript2113.15.nnic	antisense	982	2666
Mouse	ENSMUSG00000006373	ENSMUST00000073339	full-splice_match	1857	2663
Mouse	ENSMUSG00000031827	ENSMUST00000034285	full-splice_match	1596	2662
Mouse	ENSMUSG00000012848	transcript2234.7.nnic	novel_not_in_catalog	252	2661
Mouse	ENSMUSG00000054766	ENSMUST00000067996	full-splice_match	2834	2659
Mouse	ENSMUSG00000098234	ENSMUST00000182742	full-splice_match	400	2656
Mouse	ENSMUSG00000015092	ENSMUST00000015236	full-splice_match	722	2655
Mouse	ENSMUSG00000039530	transcript3744.8.nnic	novel_not_in_catalog	1553	2655
Mouse	ENSMUSG00000022890	ENSMUST00000146103	full-splice_match	526	2652
Mouse	ENSMUSG00000012483	ENSMUST00000012627	full-splice_match	670	2648
Mouse	ENSMUSG00000028964	ENSMUST00000105675	full-splice_match	882	2647
Mouse	ENSMUSG00000014867	ENSMUST00000015011	full-splice_match	3281	2641
Mouse	novelGene_ENSMUSG00000017466_AS	transcript27890.11.nnic	antisense	657	2641
Mouse	ENSMUSG00000014846	ENSMUST00000014990	full-splice_match	1127	2633
Mouse	ENSMUSG00000024474	ENSMUST00000224284	full-splice_match	1931	2630
Mouse	ENSMUSG00000030298	ENSMUST00000032440	full-splice_match	1353	2626
Mouse	ENSMUSG00000016256	ENSMUST00000016400	full-splice_match	1441	2616
Mouse	ENSMUSG00000028788	ENSMUST00000165853	full-splice_match	3382	2615
Mouse	ENSMUSG00000038366	ENSMUST00000043843	full-splice_match	3540	2606
Mouse	ENSMUSG00000002524	ENSMUST00000100527	full-splice_match	1881	2603
Mouse	ENSMUSG00000029621	ENSMUST00000031625	full-splice_match	1632	2602
Mouse	ENSMUSG00000030770	ENSMUST00000033030	full-splice_match	4454	2596
Mouse	ENSMUSG00000021996	ENSMUST00000176957	full-splice_match	1117	2596
Mouse	ENSMUSG00000036372	ENSMUST00000040372	full-splice_match	606	2595
Mouse	ENSMUSG00000019916	transcript4313.10.nnic	novel_not_in_catalog	1494	2592
Mouse	ENSMUSG00000022336	ENSMUST00000022960	full-splice_match	1506	2591
Mouse	ENSMUSG00000029642	ENSMUST00000050970	full-splice_match	1196	2589
Mouse	ENSMUSG00000017188	ENSMUST00000017332	full-splice_match	886	2577
Mouse	ENSMUSG00000001025	ENSMUST00000198128	full-splice_match	464	2576
Mouse	ENSMUSG00000024098	ENSMUST00000024906	full-splice_match	4086	2564
Mouse	ENSMUSG00000001270	ENSMUST00000001304	full-splice_match	1472	2559
Mouse	ENSMUSG00000028936	ENSMUST00000156445	full-splice_match	369	2558
Mouse	ENSMUSG00000046432	ENSMUST00000053540	full-splice_match	930	2557
Mouse	ENSMUSG00000035783	transcript7831.19.nnic	novel_not_in_catalog	1566	2554
Mouse	ENSMUSG00000055839	ENSMUST00000069579	full-splice_match	537	2551
Mouse	ENSMUSG00000018567	ENSMUST00000108592	full-splice_match	750	2550
Mouse	ENSMUSG00000027996	ENSMUST00000029625	full-splice_match	2003	2548
Mouse	ENSMUSG00000028643	ENSMUST00000030395	full-splice_match	733	2542
Mouse	ENSMUSG00000042406	ENSMUST00000230434	full-splice_match	2019	2536
Mouse	ENSMUSG00000060373	ENSMUST00000227536	full-splice_match	1301	2535
Mouse	ENSMUSG00000070923	ENSMUST00000094993	full-splice_match	4174	2534
Mouse	ENSMUSG00000037894	ENSMUST00000041045	full-splice_match	1069	2531
Mouse	ENSMUSG00000047261	ENSMUST00000102817	full-splice_match	1420	2531
Mouse	ENSMUSG00000034932	transcript10037.10.nnic	novel_not_in_catalog	663	2530
Mouse	ENSMUSG00000016541	transcript9953.15.nnic	novel_not_in_catalog	786	2525
Mouse	ENSMUSG00000029231	ENSMUST00000168162	full-splice_match	6834	2521
Mouse	ENSMUSG00000015776	ENSMUST00000102899	full-splice_match	3506	2516
Mouse	ENSMUSG00000027642	transcript21770.2.nnic	novel_not_in_catalog	750	2514
Mouse	ENSMUSG00000020859	ENSMUST00000041956	full-splice_match	7340	2514
Mouse	ENSMUSG00000043483	transcript8501.12.nnic	genic	503	2507
Mouse	ENSMUSG00000020076	transcript5084.10.nnic	novel_not_in_catalog	709	2505
Mouse	ENSMUSG00000045767	ENSMUST00000057844	full-splice_match	4652	2500
Mouse	ENSMUSG00000061816	ENSMUST00000027151	full-splice_match	1082	2486
Mouse	ENSMUSG00000030512	ENSMUST00000032723	full-splice_match	955	2486
Mouse	ENSMUSG00000004415	ENSMUST00000111103	full-splice_match	2781	2484
Mouse	ENSMUSG00000032180	ENSMUST00000213316	full-splice_match	1454	2481
Mouse	ENSMUSG00000032575	transcript15931.9.nnic	novel_not_in_catalog	838	2480
Mouse	ENSMUSG00000026418	ENSMUST00000148201	full-splice_match	1150	2479
Mouse	ENSMUSG00000030541	ENSMUST00000107384	full-splice_match	1745	2479
Mouse	ENSMUSG00000031796	ENSMUST00000034249	full-splice_match	1295	2478
Mouse	ENSMUSG00000018411	ENSMUST00000106992	full-splice_match	5253	2477
Mouse	ENSMUSG00000019851	ENSMUST00000019998	full-splice_match	1952	2470
Mouse	ENSMUSG00000029838	transcript2874.6.nnic	novel_not_in_catalog	326	2467
Mouse	ENSMUSG00000048895	ENSMUST00000053413	full-splice_match	4162	2465
Mouse	ENSMUSG00000032766	ENSMUST00000031670	full-splice_match	919	2458
Mouse	ENSMUSG00000061723	ENSMUST00000105954	full-splice_match	1052	2456
Mouse	ENSMUSG00000060992	ENSMUST00000100162	full-splice_match	1676	2456
Mouse	ENSMUSG00000062421	ENSMUST00000057921	full-splice_match	2242	2450
Mouse	ENSMUSG00000020053	ENSMUST00000095360	full-splice_match	7052	2446
Mouse	ENSMUSG00000026234	ENSMUST00000188682	full-splice_match	601	2443
Mouse	ENSMUSG00000034993	ENSMUST00000040430	full-splice_match	2766	2441
Mouse	ENSMUSG00000054196	ENSMUST00000144800	full-splice_match	912	2437
Mouse	ENSMUSG00000002265	transcript1654.7.nnic	novel_not_in_catalog	827	2435
Mouse	ENSMUSG00000032279	ENSMUST00000214136	full-splice_match	1570	2430
Mouse	ENSMUSG00000002107	ENSMUST00000114934	full-splice_match	5470	2428
Mouse	ENSMUSG00000005732	ENSMUST00000115645	full-splice_match	1085	2424
Mouse	ENSMUSG00000030704	ENSMUST00000098252	full-splice_match	3110	2422
Mouse	ENSMUSG00000015165	ENSMUST00000174526	full-splice_match	672	2417
Mouse	ENSMUSG00000000184	ENSMUST00000000188	full-splice_match	6330	2415
Mouse	ENSMUSG00000020745	ENSMUST00000102520	full-splice_match	5789	2414
Mouse	ENSMUSG00000006273	ENSMUST00000006435	full-splice_match	2825	2412
Mouse	ENSMUSG00000019087	ENSMUST00000019231	full-splice_match	2189	2407
Mouse	ENSMUSG00000027404	ENSMUST00000103199	full-splice_match	1161	2397
Mouse	ENSMUSG00000064368	ENSMUST00000082419	full-splice_match	519	2396
Mouse	ENSMUSG00000001017	ENSMUST00000076639	full-splice_match	1842	2394
Mouse	novelGene_ENSMUSG00000020770_AS	transcript26787.11.nnic	antisense	1586	2393
Mouse	ENSMUSG00000028759	ENSMUST00000105826	full-splice_match	3348	2391
Mouse	ENSMUSG00000050071	ENSMUST00000058125	full-splice_match	866	2390
Mouse	ENSMUSG00000029106	ENSMUST00000114335	full-splice_match	4547	2388
Mouse	ENSMUSG00000087590	ENSMUST00000146010	full-splice_match	430	2385
Mouse	ENSMUSG00000116636	ENSMUST00000232664	full-splice_match	781	2378
Mouse	ENSMUSG00000017677	ENSMUST00000150416	full-splice_match	2338	2375
Mouse	ENSMUSG00000070394	ENSMUST00000133967	full-splice_match	421	2372
Mouse	ENSMUSG00000002900	ENSMUST00000002979	full-splice_match	5784	2370
Mouse	ENSMUSG00000063015	ENSMUST00000058550	full-splice_match	2804	2366
Mouse	ENSMUSG00000061723	ENSMUST00000144259	full-splice_match	471	2365
Mouse	ENSMUSG00000058254	ENSMUST00000076354	full-splice_match	1733	2360
Mouse	ENSMUSG00000025503	ENSMUST00000026576	full-splice_match	1229	2357
Mouse	ENSMUSG00000034708	ENSMUST00000049460	full-splice_match	2340	2357
Mouse	ENSMUSG00000002778	ENSMUST00000211716	full-splice_match	1350	2355
Mouse	ENSMUSG00000056481	ENSMUST00000070630	full-splice_match	2560	2354
Mouse	ENSMUSG00000000983	ENSMUST00000001009	full-splice_match	521	2352
Mouse	ENSMUSG00000022051	ENSMUST00000022634	full-splice_match	3238	2348
Mouse	ENSMUSG00000002015	ENSMUST00000002091	full-splice_match	1219	2348
Mouse	ENSMUSG00000075012	ENSMUST00000099678	full-splice_match	3134	2347
Mouse	ENSMUSG00000009863	ENSMUST00000010007	full-splice_match	1142	2341
Mouse	ENSMUSG00000052997	ENSMUST00000102746	full-splice_match	2579	2339
Mouse	ENSMUSG00000020594	ENSMUST00000111122	full-splice_match	6311	2337
Mouse	novelGene_ENSMUSG00000027203_AS	transcript16153.2.nnic	antisense	1058	2335
Mouse	ENSMUSG00000046364	ENSMUST00000143107	full-splice_match	1158	2334
Mouse	ENSMUSG00000026341	ENSMUST00000178474	full-splice_match	2565	2333
Mouse	ENSMUSG00000005566	ENSMUST00000123778	full-splice_match	565	2333
Mouse	ENSMUSG00000016921	ENSMUST00000130411	full-splice_match	3527	2330
Mouse	ENSMUSG00000013160	ENSMUST00000013304	full-splice_match	1629	2330
Mouse	ENSMUSG00000020850	ENSMUST00000018449	full-splice_match	7442	2329
Mouse	ENSMUSG00000028339	ENSMUST00000102917	full-splice_match	5172	2328
Mouse	ENSMUSG00000004558	ENSMUST00000004673	full-splice_match	2099	2328
Mouse	ENSMUSG00000051391	ENSMUST00000055808	full-splice_match	3520	2326
Mouse	ENSMUSG00000068039	ENSMUST00000089024	full-splice_match	1902	2326
Mouse	ENSMUSG00000030342	ENSMUST00000032492	full-splice_match	1228	2325
Mouse	ENSMUSG00000021087	ENSMUST00000137990	full-splice_match	1008	2325
Mouse	ENSMUSG00000003721	transcript11358.1.nnic	novel_not_in_catalog	1218	2324
Mouse	ENSMUSG00000044894	ENSMUST00000156503	full-splice_match	375	2323
Mouse	ENSMUSG00000036241	transcript2397.4.nnic	novel_in_catalog	1058	2321
Mouse	ENSMUSG00000036752	transcript2224.2.nnic	novel_not_in_catalog	845	2320
Mouse	ENSMUSG00000024472	ENSMUST00000025350	full-splice_match	8616	2318
Mouse	ENSMUSG00000020547	ENSMUST00000020856	full-splice_match	1871	2317
Mouse	ENSMUSG00000025351	ENSMUST00000026407	full-splice_match	1063	2310
Mouse	ENSMUSG00000021361	transcript3366.13.nnic	novel_in_catalog	897	2310
Mouse	ENSMUSG00000058354	ENSMUST00000023788	full-splice_match	2278	2310
Mouse	ENSMUSG00000051154	ENSMUST00000061158	full-splice_match	935	2307
Mouse	ENSMUSG00000019370	transcript3477.7.nnic	novel_not_in_catalog	1052	2307
Mouse	ENSMUSG00000025410	ENSMUST00000026479	full-splice_match	1784	2305
Mouse	ENSMUSG00000021102	transcript9548.12.nnic	novel_not_in_catalog	1009	2304
Mouse	ENSMUSG00000071655	ENSMUST00000096255	full-splice_match	1041	2302
Mouse	ENSMUSG00000021486	ENSMUST00000021942	full-splice_match	2644	2301
Mouse	ENSMUSG00000037058	transcript2534.18.nnic	novel_not_in_catalog	1508	2301
Mouse	ENSMUSG00000040385	transcript1029.19.nnic	novel_not_in_catalog	459	2301
Mouse	ENSMUSG00000022890	ENSMUST00000144799	full-splice_match	514	2300
Mouse	ENSMUSG00000064138	ENSMUST00000091459	full-splice_match	3892	2299
Mouse	ENSMUSG00000022536	ENSMUST00000115844	full-splice_match	3292	2299
Mouse	ENSMUSG00000078713	ENSMUST00000107810	full-splice_match	639	2291
Mouse	ENSMUSG00000038803	ENSMUST00000132034	full-splice_match	576	2290
Mouse	ENSMUSG00000025289	transcript9703.X.nnic	novel_not_in_catalog	1070	2290
Mouse	ENSMUSG00000022312	ENSMUST00000022925	full-splice_match	1295	2286
Mouse	ENSMUSG00000028576	ENSMUST00000030311	full-splice_match	2139	2282
Mouse	ENSMUSG00000004530	ENSMUST00000004646	full-splice_match	3491	2281
Mouse	ENSMUSG00000019210	ENSMUST00000019354	full-splice_match	1312	2270
Mouse	ENSMUSG00000036850	ENSMUST00000045604	full-splice_match	776	2267
Mouse	ENSMUSG00000026585	ENSMUST00000027877	full-splice_match	3946	2262
Mouse	ENSMUSG00000015932	ENSMUST00000103172	full-splice_match	1911	2262
Mouse	ENSMUSG00000039067	ENSMUST00000044106	full-splice_match	1581	2257
Mouse	novelGene_ENSMUSG00000020737_AS	transcript26019.11.nnic	antisense	712	2255
Mouse	ENSMUSG00000004937	ENSMUST00000218208	full-splice_match	1964	2251
Mouse	ENSMUSG00000093483	ENSMUST00000177150	full-splice_match	383	2250
Mouse	ENSMUSG00000024271	transcript1388.18.nic	incomplete-splice_match	1171	2248
Mouse	ENSMUSG00000032397	ENSMUST00000034964	full-splice_match	1211	2242
Mouse	ENSMUSG00000029922	ENSMUST00000031985	full-splice_match	3046	2241
Mouse	ENSMUSG00000070934	ENSMUST00000091064	full-splice_match	1618	2239
Mouse	ENSMUSG00000020483	transcript17619.11.nnic	novel_not_in_catalog	855	2239
Mouse	ENSMUSG00000031097	ENSMUST00000105973	full-splice_match	668	2236
Mouse	ENSMUSG00000035227	ENSMUST00000207406	full-splice_match	1630	2233
Mouse	ENSMUSG00000021288	ENSMUST00000120544	full-splice_match	2261	2233
Mouse	ENSMUSG00000038467	ENSMUST00000044277	full-splice_match	1616	2230
Mouse	ENSMUSG00000022108	transcript9494.14.nnic	novel_not_in_catalog	531	2230
Mouse	ENSMUSG00000014980	ENSMUST00000015124	full-splice_match	1133	2229
Mouse	ENSMUSG00000079562	ENSMUST00000114449	full-splice_match	2193	2226
Mouse	ENSMUSG00000004789	ENSMUST00000053811	full-splice_match	2764	2226
Mouse	ENSMUSG00000002233	ENSMUST00000002303	full-splice_match	1202	2225
Mouse	ENSMUSG00000058594	ENSMUST00000071564	full-splice_match	3567	2223
Mouse	ENSMUSG00000038668	ENSMUST00000055018	full-splice_match	3512	2221
Mouse	ENSMUSG00000041378	ENSMUST00000043577	full-splice_match	1416	2219
Mouse	ENSMUSG00000027357	ENSMUST00000028835	full-splice_match	1924	2213
Mouse	ENSMUSG00000071561	ENSMUST00000138796	full-splice_match	510	2213
Mouse	ENSMUSG00000006299	ENSMUST00000178235	full-splice_match	1756	2210
Mouse	ENSMUSG00000037206	ENSMUST00000041477	full-splice_match	2223	2210
Mouse	ENSMUSG00000019777	ENSMUST00000128031	full-splice_match	906	2210
Mouse	ENSMUSG00000067847	ENSMUST00000109597	full-splice_match	550	2208
Mouse	ENSMUSG00000021501	ENSMUST00000021963	full-splice_match	1382	2208
Mouse	ENSMUSG00000063412	ENSMUST00000080152	full-splice_match	736	2206
Mouse	ENSMUSG00000038502	ENSMUST00000207416	full-splice_match	657	2205
Mouse	ENSMUSG00000024213	ENSMUST00000025050	full-splice_match	2223	2205
Mouse	ENSMUSG00000028745	ENSMUST00000102508	full-splice_match	1674	2203
Mouse	ENSMUSG00000064373	ENSMUST00000082424	full-splice_match	2013	2201
Mouse	ENSMUSG00000002102	ENSMUST00000067663	full-splice_match	1636	2196
Mouse	ENSMUSG00000006418	transcript24396.2.nnic	novel_not_in_catalog	1115	2189
Mouse	ENSMUSG00000028675	ENSMUST00000030436	full-splice_match	1919	2188
Mouse	ENSMUSG00000006095	ENSMUST00000006254	full-splice_match	1416	2187
Mouse	ENSMUSG00000002580	ENSMUST00000002655	full-splice_match	747	2184
Mouse	ENSMUSG00000034160	ENSMUST00000044475	full-splice_match	5384	2183
Mouse	novelGene_ENSMUSG00000005034_AS	transcript16148.3.nnic	antisense	1976	2181
Mouse	ENSMUSG00000025035	ENSMUST00000026009	full-splice_match	822	2177
Mouse	ENSMUSG00000019158	ENSMUST00000209536	full-splice_match	699	2176
Mouse	ENSMUSG00000060962	ENSMUST00000041703	full-splice_match	662	2174
Mouse	ENSMUSG00000024581	ENSMUST00000025474	full-splice_match	3562	2173
Mouse	ENSMUSG00000024381	transcript1781.18.nnic	novel_not_in_catalog	944	2173
Mouse	ENSMUSG00000000402	ENSMUST00000000412	full-splice_match	2704	2165
Mouse	ENSMUSG00000016554	ENSMUST00000100484	full-splice_match	1899	2163
Mouse	ENSMUSG00000027500	transcript256.3.nnic	novel_not_in_catalog	751	2161
Mouse	ENSMUSG00000027367	ENSMUST00000110375	full-splice_match	3116	2158
Mouse	ENSMUSG00000038722	ENSMUST00000162594	full-splice_match	867	2158
Mouse	ENSMUSG00000030795	ENSMUST00000121616	full-splice_match	1102	2157
Mouse	ENSMUSG00000020257	ENSMUST00000020490	full-splice_match	3747	2157
Mouse	ENSMUSG00000061808	ENSMUST00000075312	full-splice_match	1186	2157
Mouse	ENSMUSG00000063511	transcript13607.7.nnic	novel_not_in_catalog	950	2149
Mouse	ENSMUSG00000009549	ENSMUST00000149615	full-splice_match	542	2148
Mouse	ENSMUSG00000023175	ENSMUST00000105381	full-splice_match	1240	2148
Mouse	ENSMUSG00000041028	ENSMUST00000042564	full-splice_match	2573	2148
Mouse	ENSMUSG00000045690	ENSMUST00000062370	full-splice_match	2979	2147
Mouse	ENSMUSG00000021748	ENSMUST00000022268	full-splice_match	1513	2145
Mouse	ENSMUSG00000026857	ENSMUST00000138889	full-splice_match	1192	2143
Mouse	ENSMUSG00000045962	ENSMUST00000159903	full-splice_match	2934	2141
Mouse	ENSMUSG00000053192	ENSMUST00000065482	full-splice_match	1923	2140
Mouse	ENSMUSG00000038587	transcript103.10.nic	incomplete-splice_match	3027	2139
Mouse	ENSMUSG00000031885	ENSMUST00000109395	full-splice_match	2709	2138
Mouse	ENSMUSG00000021111	ENSMUST00000169938	full-splice_match	4356	2138
Mouse	novelGene_ENSMUSG00000013236_AS	transcript15077.17.nnic	antisense	829	2137
Mouse	ENSMUSG00000006333	ENSMUST00000146927	full-splice_match	813	2136
Mouse	ENSMUSG00000032348	ENSMUST00000034903	full-splice_match	977	2134
Mouse	ENSMUSG00000003660	ENSMUST00000103220	full-splice_match	6745	2132
Mouse	ENSMUSG00000021242	transcript7465.12.nnic	novel_in_catalog	1122	2128
Mouse	ENSMUSG00000022403	ENSMUST00000172107	full-splice_match	3346	2128
Mouse	ENSMUSG00000059278	ENSMUST00000144531	full-splice_match	671	2124
Mouse	ENSMUSG00000025132	transcript29257.11.nnic	novel_not_in_catalog	372	2121
Mouse	ENSMUSG00000027067	ENSMUST00000077798	full-splice_match	2739	2120
Mouse	ENSMUSG00000031628	ENSMUST00000211115	full-splice_match	2601	2120
Mouse	ENSMUSG00000026526	ENSMUST00000130996	full-splice_match	539	2116
Mouse	ENSMUSG00000041084	ENSMUST00000043937	full-splice_match	1067	2114
Mouse	ENSMUSG00000037499	ENSMUST00000046770	full-splice_match	742	2113
Mouse	ENSMUSG00000051989	ENSMUST00000063641	full-splice_match	517	2109
Mouse	ENSMUSG00000021576	ENSMUST00000022060	full-splice_match	1131	2107
Mouse	ENSMUSG00000001794	ENSMUST00000126116	full-splice_match	1429	2105
Mouse	ENSMUSG00000020894	ENSMUST00000021273	full-splice_match	2205	2104
Mouse	ENSMUSG00000097971_ENSMUSG00000098178	transcript11417.17.nnic	fusion	884	2104
Mouse	ENSMUSG00000000001	ENSMUST00000000001	full-splice_match	3262	2101
Mouse	ENSMUSG00000020840	ENSMUST00000021197	full-splice_match	2497	2101
Mouse	ENSMUSG00000028932	ENSMUST00000030769	full-splice_match	1785	2099
Mouse	ENSMUSG00000029817	ENSMUST00000203820	full-splice_match	2090	2099
Mouse	ENSMUSG00000022757	transcript7461.16.nic	incomplete-splice_match	1292	2097
Mouse	ENSMUSG00000051223	ENSMUST00000050552	full-splice_match	3876	2096
Mouse	ENSMUSG00000027893	ENSMUST00000029490	full-splice_match	3863	2096
Mouse	ENSMUSG00000017221	ENSMUST00000017365	full-splice_match	2148	2095
Mouse	ENSMUSG00000073616	ENSMUST00000154129	full-splice_match	482	2093
Mouse	ENSMUSG00000034165	ENSMUST00000182209	full-splice_match	1977	2091
Mouse	ENSMUSG00000024829	ENSMUST00000025743	full-splice_match	802	2091
Mouse	ENSMUSG00000013822	ENSMUST00000013966	full-splice_match	888	2084
Mouse	ENSMUSG00000042045	transcript6485.9.nnic	novel_not_in_catalog	712	2083
Mouse	ENSMUSG00000071415	ENSMUST00000103146	full-splice_match	1059	2083
Mouse	ENSMUSG00000028465	ENSMUST00000030187	full-splice_match	8393	2080
Mouse	ENSMUSG00000075467	transcript3157.2.nic	incomplete-splice_match	612	2079
Mouse	ENSMUSG00000015749	ENSMUST00000165307	full-splice_match	3274	2079
Mouse	ENSMUSG00000026223	ENSMUST00000027425	full-splice_match	2230	2077
Mouse	ENSMUSG00000039168	ENSMUST00000044524	full-splice_match	1555	2076
Mouse	ENSMUSG00000026566	transcript16298.1.nnic	novel_not_in_catalog	2078	2075
Mouse	ENSMUSG00000109509	ENSMUST00000208689	full-splice_match	397	2075
Mouse	ENSMUSG00000053332	ENSMUST00000161623	full-splice_match	403	2073
Mouse	ENSMUSG00000041084	ENSMUST00000197152	full-splice_match	704	2072
Mouse	ENSMUSG00000028234	ENSMUST00000130128	full-splice_match	512	2072
Mouse	novelGene_ENSMUSG00000087394_AS	transcript12309.4.nnic	antisense	1299	2072
Mouse	ENSMUSG00000012405	ENSMUST00000080281	full-splice_match	1922	2071
Mouse	ENSMUSG00000040459	transcript528.8.nnic	novel_not_in_catalog	1245	2067
Mouse	ENSMUSG00000071497	ENSMUST00000095978	full-splice_match	864	2066
Mouse	ENSMUSG00000020061	transcript11491.10.nic	incomplete-splice_match	1728	2063
Mouse	ENSMUSG00000035799	ENSMUST00000049089	full-splice_match	1628	2060
Mouse	ENSMUSG00000048307	ENSMUST00000057486	full-splice_match	2509	2058
Mouse	ENSMUSG00000030662	ENSMUST00000032898	full-splice_match	4518	2056
Mouse	ENSMUSG00000044155	ENSMUST00000056398	full-splice_match	807	2053
Mouse	ENSMUSG00000021917	transcript3008.14.nnic	novel_not_in_catalog	681	2050
Mouse	ENSMUSG00000024873	transcript1680.19.nic	incomplete-splice_match	1292	2049
Mouse	ENSMUSG00000025781	ENSMUST00000026887	full-splice_match	1060	2047
Mouse	ENSMUSG00000029580	transcript19584.5.nnic	novel_not_in_catalog	514	2047
Mouse	ENSMUSG00000015090	ENSMUST00000114259	full-splice_match	775	2044
Mouse	ENSMUSG00000036606	ENSMUST00000143014	full-splice_match	834	2042
Mouse	ENSMUSG00000046402	ENSMUST00000052068	full-splice_match	2652	2040
Mouse	ENSMUSG00000031983	ENSMUST00000034464	full-splice_match	3307	2038
Mouse	ENSMUSG00000098087	ENSMUST00000182477	full-splice_match	529	2038
Mouse	ENSMUSG00000026914	ENSMUST00000028278	full-splice_match	1541	2033
Mouse	ENSMUSG00000034349	ENSMUST00000042901	full-splice_match	4316	2032
Mouse	ENSMUSG00000030357	ENSMUST00000032508	full-splice_match	2217	2031
Mouse	ENSMUSG00000022312	transcript2995.15.nnic	novel_not_in_catalog	654	2030
Mouse	ENSMUSG00000068706	ENSMUST00000090488	full-splice_match	482	2028
Mouse	ENSMUSG00000025151	ENSMUST00000139375	full-splice_match	1274	2028
Mouse	ENSMUSG00000021037	ENSMUST00000021425	full-splice_match	1377	2026
Mouse	ENSMUSG00000040048	ENSMUST00000141324	full-splice_match	430	2026
Mouse	ENSMUSG00000024949	ENSMUST00000113487	full-splice_match	2649	2026
Mouse	ENSMUSG00000004044	ENSMUST00000060792	full-splice_match	3491	2025
Mouse	ENSMUSG00000022200	ENSMUST00000059680	full-splice_match	2652	2024
Mouse	ENSMUSG00000025381	ENSMUST00000026446	full-splice_match	763	2023
Mouse	ENSMUSG00000025162	transcript30037.11.nnic	novel_not_in_catalog	1082	2016
Mouse	ENSMUSG00000015837	transcript5920.11.nnic	novel_not_in_catalog	1954	2015
Mouse	ENSMUSG00000020089	ENSMUST00000020286	full-splice_match	1364	2014
Mouse	ENSMUSG00000058013	transcript8126.5.nnic	novel_not_in_catalog	1662	2013
Mouse	ENSMUSG00000030095	ENSMUST00000032183	full-splice_match	2903	2012
Mouse	ENSMUSG00000035901	transcript22328.7.nic	incomplete-splice_match	1859	2010
Mouse	ENSMUSG00000018567	ENSMUST00000144443	full-splice_match	932	2010
Mouse	ENSMUSG00000024844	transcript1939.19.nnic	novel_in_catalog	864	2009
Mouse	ENSMUSG00000041040	ENSMUST00000036540	full-splice_match	5532	2004
Mouse	ENSMUSG00000069171	ENSMUST00000091458	full-splice_match	3207	2004
Mouse	ENSMUSG00000062456	ENSMUST00000078034	full-splice_match	691	2000
Mouse	ENSMUSG00000041891	ENSMUST00000048260	full-splice_match	3563	1996
Mouse	ENSMUSG00000070047	transcript4051.8.nic	incomplete-splice_match	2045	1994
Mouse	ENSMUSG00000025743	ENSMUST00000070478	full-splice_match	4973	1992
Mouse	ENSMUSG00000023495	transcript15718.9.nic	novel_in_catalog	1856	1992
Mouse	ENSMUSG00000071662	ENSMUST00000096261	full-splice_match	868	1988
Mouse	ENSMUSG00000001416	ENSMUST00000164122	full-splice_match	472	1986
Mouse	ENSMUSG00000004069	ENSMUST00000115854	full-splice_match	2505	1986
Mouse	ENSMUSG00000002660	ENSMUST00000002735	full-splice_match	983	1986
Mouse	ENSMUSG00000058267	ENSMUST00000078878	full-splice_match	674	1985
Mouse	ENSMUSG00000031078	ENSMUST00000033407	full-splice_match	2913	1985
Mouse	ENSMUSG00000030934	ENSMUST00000084500	full-splice_match	2152	1983
Mouse	ENSMUSG00000032353	ENSMUST00000058488	full-splice_match	1346	1983
Mouse	ENSMUSG00000039883	ENSMUST00000035651	full-splice_match	2154	1981
Mouse	ENSMUSG00000046785	ENSMUST00000135807	full-splice_match	4245	1981
Mouse	ENSMUSG00000020577	ENSMUST00000020896	full-splice_match	1932	1981
Mouse	ENSMUSG00000025465	ENSMUST00000026538	full-splice_match	1557	1978
Mouse	ENSMUSG00000060904	transcript11601.10.nnic	novel_not_in_catalog	1309	1976
Mouse	ENSMUSG00000025651	transcript17203.9.nnic	novel_not_in_catalog	365	1974
Mouse	ENSMUSG00000009293	ENSMUST00000174510	full-splice_match	2031	1973
Mouse	ENSMUSG00000041697	ENSMUST00000137766	full-splice_match	620	1972
Mouse	ENSMUSG00000022982	transcript8869.16.nnic	novel_not_in_catalog	725	1972
Mouse	ENSMUSG00000026150	ENSMUST00000160972	full-splice_match	1358	1971
Mouse	ENSMUSG00000040152	ENSMUST00000039559	full-splice_match	5848	1971
Mouse	ENSMUSG00000040280	ENSMUST00000035735	full-splice_match	934	1971
Mouse	ENSMUSG00000035325	ENSMUST00000182433	full-splice_match	1195	1970
Mouse	ENSMUSG00000102824	transcript19494.1.nnic	genic	451	1969
Mouse	ENSMUSG00000005312	ENSMUST00000076454	full-splice_match	3561	1968
Mouse	novelGene_ENSMUSG00000038518_AS	transcript3798.13.nnic	antisense	508	1968
Mouse	ENSMUSG00000029538	ENSMUST00000209604	full-splice_match	1392	1966
Mouse	ENSMUSG00000029168	ENSMUST00000114729	full-splice_match	5191	1965
Mouse	ENSMUSG00000031516	ENSMUST00000033913	full-splice_match	1249	1965
Mouse	ENSMUSG00000021377	ENSMUST00000021807	full-splice_match	2556	1962
Mouse	ENSMUSG00000010097	ENSMUST00000010248	full-splice_match	748	1962
Mouse	ENSMUSG00000034024	transcript13637.10.nnic	novel_not_in_catalog	551	1961
Mouse	ENSMUSG00000005233	ENSMUST00000112320	full-splice_match	1527	1955
Mouse	ENSMUSG00000027673	ENSMUST00000122290	full-splice_match	625	1953
Mouse	novelGene_ENSMUSG00000036565_AS	transcript19164.5.nnic	antisense	973	1953
Mouse	ENSMUSG00000017376	ENSMUST00000142739	full-splice_match	4444	1952
Mouse	ENSMUSG00000030286	ENSMUST00000032425	full-splice_match	1985	1950
Mouse	ENSMUSG00000017760	transcript23742.2.nic	incomplete-splice_match	1855	1949
Mouse	ENSMUSG00000038733	ENSMUST00000162963	full-splice_match	6452	1948
Mouse	ENSMUSG00000027500	transcript268.3.nnic	novel_not_in_catalog	758	1946
Mouse	ENSMUSG00000029307	ENSMUST00000066708	full-splice_match	2764	1946
Mouse	ENSMUSG00000019370	transcript3515.7.nic	novel_in_catalog	638	1943
Mouse	ENSMUSG00000032479	ENSMUST00000035055	full-splice_match	6091	1941
Mouse	ENSMUSG00000058569	transcript5773.13.nnic	novel_not_in_catalog	795	1939
Mouse	ENSMUSG00000025132	transcript29200.11.nnic	novel_not_in_catalog	1046	1938
Mouse	ENSMUSG00000005103	ENSMUST00000005234	full-splice_match	3089	1937
Mouse	ENSMUSG00000031197	ENSMUST00000033540	full-splice_match	1595	1937
Mouse	ENSMUSG00000029550	ENSMUST00000031530	full-splice_match	3204	1935
Mouse	ENSMUSG00000015143	ENSMUST00000021554	full-splice_match	3734	1931
Mouse	ENSMUSG00000022225	ENSMUST00000226280	full-splice_match	1090	1930
Mouse	ENSMUSG00000007564	ENSMUST00000231928	full-splice_match	524	1930
Mouse	novelGene_ENSMUSG00000064358_AS	transcript374.MT.nnic	antisense	1007	1929
Mouse	ENSMUSG00000048644	ENSMUST00000053252	full-splice_match	1212	1927
Mouse	ENSMUSG00000005054	transcript7147.10.nnic	novel_not_in_catalog	711	1927
Mouse	ENSMUSG00000001105	ENSMUST00000128788	full-splice_match	1141	1927
Mouse	ENSMUSG00000070576	ENSMUST00000094463	full-splice_match	6860	1926
Mouse	ENSMUSG00000009079	transcript826.11.nnic	novel_not_in_catalog	1520	1925
Mouse	ENSMUSG00000036781	ENSMUST00000143044	full-splice_match	566	1924
Mouse	ENSMUSG00000018672	ENSMUST00000018816	full-splice_match	930	1923
Mouse	ENSMUSG00000020496_ENSMUSG00000085379	transcript8156.11.nnic	fusion	1828	1921
Mouse	ENSMUSG00000006651	ENSMUST00000006828	full-splice_match	2343	1919
Mouse	ENSMUSG00000022450	ENSMUST00000230589	full-splice_match	440	1918
Mouse	ENSMUSG00000016534	ENSMUST00000061755	full-splice_match	3604	1917
Mouse	ENSMUSG00000023019	ENSMUST00000023760	full-splice_match	2861	1916
Mouse	ENSMUSG00000003955	ENSMUST00000231351	full-splice_match	640	1913
Mouse	ENSMUSG00000024242	ENSMUST00000112389	full-splice_match	4231	1913
Mouse	ENSMUSG00000074218	ENSMUST00000098594	full-splice_match	393	1910
Mouse	ENSMUSG00000005371	transcript18651.17.nic	incomplete-splice_match	2175	1910
Mouse	ENSMUSG00000061111	ENSMUST00000135515	full-splice_match	1256	1908
Mouse	ENSMUSG00000029090	ENSMUST00000030971	full-splice_match	4480	1907
Mouse	ENSMUSG00000025980	ENSMUST00000027123	full-splice_match	2423	1906
Mouse	ENSMUSG00000023886	ENSMUST00000024660	full-splice_match	2832	1905
Mouse	ENSMUSG00000040690	ENSMUST00000135675	full-splice_match	833	1903
Mouse	ENSMUSG00000028034	ENSMUST00000196695	full-splice_match	2374	1902
Mouse	ENSMUSG00000059668	ENSMUST00000023797	full-splice_match	2133	1898
Mouse	ENSMUSG00000070436	ENSMUST00000169437	full-splice_match	2274	1896
Mouse	ENSMUSG00000031835	transcript15641.8.nic	incomplete-splice_match	2191	1894
Mouse	ENSMUSG00000005881	ENSMUST00000006035	full-splice_match	1377	1889
Mouse	ENSMUSG00000075700	ENSMUST00000107924	full-splice_match	3157	1889
Mouse	ENSMUSG00000019978	ENSMUST00000217929	full-splice_match	3621	1889
Mouse	ENSMUSG00000030122	ENSMUST00000032216	full-splice_match	1149	1888
Mouse	novelGene_ENSMUSG00000019817_AS	transcript981.10.nnic	antisense	466	1887
Mouse	ENSMUSG00000024608	ENSMUST00000122279	full-splice_match	667	1887
Mouse	ENSMUSG00000034300	transcript2250.18.nnic	novel_not_in_catalog	1487	1884
Mouse	ENSMUSG00000031431	ENSMUST00000055738	full-splice_match	1974	1880
Mouse	ENSMUSG00000071646	ENSMUST00000096240	full-splice_match	3135	1873
Mouse	ENSMUSG00000027559	ENSMUST00000029076	full-splice_match	1679	1871
Mouse	ENSMUSG00000078453	ENSMUST00000220110	full-splice_match	768	1871
Mouse	ENSMUSG00000058569	ENSMUST00000109905	full-splice_match	1420	1867
Mouse	ENSMUSG00000055302	ENSMUST00000068795	full-splice_match	1648	1866
Mouse	ENSMUSG00000070697	ENSMUST00000090413	full-splice_match	1629	1866
Mouse	ENSMUSG00000039910	ENSMUST00000038107	full-splice_match	1979	1864
Mouse	ENSMUSG00000015217	ENSMUST00000015361	full-splice_match	1544	1860
Mouse	ENSMUSG00000028833	ENSMUST00000030637	full-splice_match	3681	1859
Mouse	ENSMUSG00000041708	ENSMUST00000123387	full-splice_match	3165	1858
Mouse	ENSMUSG00000032435	ENSMUST00000047404	full-splice_match	2601	1856
Mouse	ENSMUSG00000098178	transcript11425.17.nnic	genic	717	1856
Mouse	ENSMUSG00000028692	ENSMUST00000126146	full-splice_match	412	1855
Mouse	ENSMUSG00000030629	ENSMUST00000069537	full-splice_match	1658	1854
Mouse	ENSMUSG00000028029	ENSMUST00000029663	full-splice_match	1126	1853
Mouse	ENSMUSG00000050608	ENSMUST00000063040	full-splice_match	436	1853
Mouse	ENSMUSG00000027499	ENSMUST00000028999	full-splice_match	3617	1852
Mouse	ENSMUSG00000049354	ENSMUST00000058438	full-splice_match	5750	1852
Mouse	ENSMUSG00000030352	ENSMUST00000112173	full-splice_match	3819	1851
Mouse	ENSMUSG00000021268	ENSMUST00000166636	full-splice_match	797	1850
Mouse	ENSMUSG00000020386	ENSMUST00000020653	full-splice_match	1201	1849
Mouse	ENSMUSG00000033287	ENSMUST00000166142	full-splice_match	1632	1848
Mouse	ENSMUSG00000079215	ENSMUST00000111417	full-splice_match	4092	1844
Mouse	ENSMUSG00000063632	transcript1866.12.nnic	genic	767	1844
Mouse	ENSMUSG00000037965	ENSMUST00000037633	full-splice_match	3825	1842
Mouse	ENSMUSG00000025203	ENSMUST00000026221	full-splice_match	5453	1841
Mouse	ENSMUSG00000016528	ENSMUST00000016672	full-splice_match	2854	1840
Mouse	ENSMUSG00000028656	ENSMUST00000106257	full-splice_match	2768	1840
Mouse	ENSMUSG00000032745	ENSMUST00000136471	full-splice_match	1940	1840
Mouse	ENSMUSG00000041203	transcript10661.8.nnic	novel_not_in_catalog	1012	1839
Mouse	ENSMUSG00000020260	ENSMUST00000020493	full-splice_match	2290	1839
Mouse	ENSMUSG00000031229	ENSMUST00000113573	full-splice_match	10275	1839
Mouse	ENSMUSG00000018171	transcript17181.11.nnic	novel_not_in_catalog	1070	1838
Mouse	ENSMUSG00000032826	ENSMUST00000182588	full-splice_match	2359	1837
Mouse	ENSMUSG00000024146	ENSMUST00000024959	full-splice_match	1184	1834
Mouse	ENSMUSG00000024248	ENSMUST00000167741	full-splice_match	1129	1834
Mouse	ENSMUSG00000024870	ENSMUST00000025804	full-splice_match	1835	1834
Mouse	novelGene_ENSMUSG00000042699_AS	transcript14220.1.nnic	antisense	494	1832
Mouse	ENSMUSG00000026764	ENSMUST00000028102	full-splice_match	6856	1830
Mouse	ENSMUSG00000020843	transcript14903.11.nic	novel_in_catalog	1217	1830
Mouse	ENSMUSG00000054889	ENSMUST00000124830	full-splice_match	9592	1827
Mouse	ENSMUSG00000031681	ENSMUST00000066091	full-splice_match	3099	1826
Mouse	ENSMUSG00000056076	ENSMUST00000100507	full-splice_match	2945	1824
Mouse	ENSMUSG00000026872	ENSMUST00000068415	full-splice_match	5624	1822
Mouse	ENSMUSG00000034158	ENSMUST00000078717	full-splice_match	8604	1822
Mouse	ENSMUSG00000057322	ENSMUST00000077915	full-splice_match	364	1820
Mouse	ENSMUSG00000071041	ENSMUST00000120826	full-splice_match	1545	1817
Mouse	ENSMUSG00000025781	ENSMUST00000114897	full-splice_match	1166	1814
Mouse	ENSMUSG00000043004	ENSMUST00000160013	full-splice_match	3826	1814
Mouse	ENSMUSG00000004843	ENSMUST00000004965	full-splice_match	1872	1814
Mouse	ENSMUSG00000020475	ENSMUST00000020768	full-splice_match	840	1812
Mouse	ENSMUSG00000031320	ENSMUST00000033683	full-splice_match	975	1812
Mouse	novelGene_ENSMUSG00000076236_AS	transcript8264.13.nnic	antisense	311	1810
Mouse	ENSMUSG00000028580	ENSMUST00000030315	full-splice_match	5389	1806
Mouse	ENSMUSG00000048450	ENSMUST00000063116	full-splice_match	1935	1804
Mouse	ENSMUSG00000020993	ENSMUST00000021380	full-splice_match	1255	1804
Mouse	ENSMUSG00000021186	ENSMUST00000222587	full-splice_match	2371	1803
Mouse	ENSMUSG00000113902	ENSMUST00000221191	full-splice_match	511	1797
Mouse	ENSMUSG00000022370	ENSMUST00000164542	full-splice_match	730	1797
Mouse	ENSMUSG00000026586	ENSMUST00000027878	full-splice_match	4952	1795
Mouse	ENSMUSG00000030216	ENSMUST00000116514	full-splice_match	2739	1795
Mouse	ENSMUSG00000045193	ENSMUST00000105365	full-splice_match	1321	1792
Mouse	ENSMUSG00000022890	ENSMUST00000114191	full-splice_match	742	1791
Mouse	ENSMUSG00000042978	ENSMUST00000056028	full-splice_match	4109	1790
Mouse	ENSMUSG00000032328	ENSMUST00000034878	full-splice_match	3658	1789
Mouse	ENSMUSG00000022548	ENSMUST00000115230	full-splice_match	1070	1789
Mouse	ENSMUSG00000029030	ENSMUST00000030896	full-splice_match	1724	1787
Mouse	ENSMUSG00000022452	ENSMUST00000023086	full-splice_match	705	1787
Mouse	ENSMUSG00000050912	ENSMUST00000052865	full-splice_match	2907	1786
Mouse	ENSMUSG00000027864	ENSMUST00000102694	full-splice_match	5902	1784
Mouse	ENSMUSG00000113902	ENSMUST00000221227	full-splice_match	535	1784
Mouse	ENSMUSG00000001687	ENSMUST00000079324	full-splice_match	2537	1783
Mouse	ENSMUSG00000014551	ENSMUST00000014695	full-splice_match	565	1782
Mouse	ENSMUSG00000026701	ENSMUST00000192639	full-splice_match	1294	1781
Mouse	ENSMUSG00000028873	ENSMUST00000084296	full-splice_match	1626	1781
Mouse	ENSMUSG00000027712	transcript2407.3.nnic	novel_not_in_catalog	243	1780
Mouse	novelGene_ENSMUSG00000029068_AS	transcript20993.4.nnic	antisense	988	1777
Mouse	ENSMUSG00000061353	transcript12200.6.nnic	novel_not_in_catalog	972	1773
Mouse	ENSMUSG00000052488	ENSMUST00000079510	full-splice_match	3713	1773
Mouse	ENSMUSG00000041881	ENSMUST00000173946	full-splice_match	640	1773
Mouse	ENSMUSG00000042312	ENSMUST00000048138	full-splice_match	715	1772
Mouse	ENSMUSG00000028649	transcript11396.4.nic	incomplete-splice_match	2274	1772
Mouse	ENSMUSG00000045312	ENSMUST00000121618	full-splice_match	4209	1772
Mouse	ENSMUSG00000027634	ENSMUST00000072298	full-splice_match	2586	1771
Mouse	ENSMUSG00000060935	ENSMUST00000095383	full-splice_match	3616	1767
Mouse	ENSMUSG00000016921	transcript22820.2.nic	incomplete-splice_match	2207	1764
Mouse	ENSMUSG00000027559	transcript869.3.nnic	novel_not_in_catalog	1220	1761
Mouse	ENSMUSG00000008540	ENSMUST00000008684	full-splice_match	1167	1760
Mouse	ENSMUSG00000001552	ENSMUST00000001592	full-splice_match	3205	1760
Mouse	ENSMUSG00000025232	ENSMUST00000026262	full-splice_match	1996	1759
Mouse	ENSMUSG00000025092	ENSMUST00000066285	full-splice_match	5733	1759
Mouse	ENSMUSG00000020091	ENSMUST00000020288	full-splice_match	5784	1758
Mouse	ENSMUSG00000033161	transcript11040.3.nnic	novel_not_in_catalog	777	1757
Mouse	ENSMUSG00000036751	ENSMUST00000208352	full-splice_match	293	1757
Mouse	ENSMUSG00000059534	ENSMUST00000130236	full-splice_match	389	1757
Mouse	ENSMUSG00000020297	transcript3623.11.nnic	novel_not_in_catalog	234	1755
Mouse	ENSMUSG00000025016	ENSMUST00000025989	full-splice_match	6144	1754
Mouse	ENSMUSG00000004383	transcript8414.8.nic	incomplete-splice_match	1733	1753
Mouse	ENSMUSG00000030246	ENSMUST00000032373	full-splice_match	1304	1752
Mouse	ENSMUSG00000033059	ENSMUST00000045441	full-splice_match	3909	1751
Mouse	ENSMUSG00000018042	ENSMUST00000162834	full-splice_match	1982	1750
Mouse	ENSMUSG00000032366	ENSMUST00000113685	full-splice_match	1208	1748
Mouse	ENSMUSG00000021134	ENSMUST00000110356	full-splice_match	1568	1747
Mouse	ENSMUSG00000048578	ENSMUST00000112121	full-splice_match	5955	1745
Mouse	ENSMUSG00000031207	ENSMUST00000117399	full-splice_match	3842	1745
Mouse	ENSMUSG00000006717	ENSMUST00000006900	full-splice_match	721	1744
Mouse	ENSMUSG00000102976	ENSMUST00000191896	full-splice_match	4396	1742
Mouse	ENSMUSG00000042306	ENSMUST00000164481	full-splice_match	915	1742
Mouse	ENSMUSG00000007850	ENSMUST00000109142	full-splice_match	2427	1740
Mouse	ENSMUSG00000020186	ENSMUST00000220301	full-splice_match	720	1739
Mouse	ENSMUSG00000049932	ENSMUST00000052686	full-splice_match	1384	1738
Mouse	ENSMUSG00000013698	ENSMUST00000111247	full-splice_match	2435	1737
Mouse	ENSMUSG00000040269	ENSMUST00000042148	full-splice_match	783	1735
Mouse	ENSMUSG00000003099	ENSMUST00000003183	full-splice_match	2072	1735
Mouse	ENSMUSG00000026356	ENSMUST00000027602	full-splice_match	2175	1733
Mouse	ENSMUSG00000030603	ENSMUST00000032824	full-splice_match	1440	1732
Mouse	ENSMUSG00000021286	ENSMUST00000021714	full-splice_match	1308	1732
Mouse	ENSMUSG00000032199	transcript11433.9.nnic	novel_not_in_catalog	688	1729
Mouse	ENSMUSG00000001348	ENSMUST00000069330	full-splice_match	1356	1728
Mouse	ENSMUSG00000035048	ENSMUST00000186693	full-splice_match	595	1728
Mouse	ENSMUSG00000036299	transcript6920.18.nnic	novel_not_in_catalog	944	1728
Mouse	ENSMUSG00000019777	ENSMUST00000019911	full-splice_match	2005	1727
Mouse	ENSMUSG00000034484	ENSMUST00000037850	full-splice_match	2013	1727
Mouse	ENSMUSG00000001424	ENSMUST00000001460	full-splice_match	3482	1726
Mouse	ENSMUSG00000025809	ENSMUST00000090006	full-splice_match	3815	1726
Mouse	ENSMUSG00000042834	ENSMUST00000171533	full-splice_match	2156	1726
Mouse	ENSMUSG00000054675	ENSMUST00000067853	full-splice_match	2242	1724
Mouse	ENSMUSG00000045482	ENSMUST00000198524	full-splice_match	3101	1724
Mouse	ENSMUSG00000022204	ENSMUST00000022815	full-splice_match	1200	1724
Mouse	ENSMUSG00000030282	ENSMUST00000032419	full-splice_match	1760	1723
Mouse	ENSMUSG00000026414	ENSMUST00000112086	full-splice_match	1094	1720
Mouse	ENSMUSG00000074457	ENSMUST00000098910	full-splice_match	1123	1719
Mouse	ENSMUSG00000019927	ENSMUST00000020085	full-splice_match	1431	1719
Mouse	ENSMUSG00000022474	ENSMUST00000023112	full-splice_match	1300	1718
Mouse	ENSMUSG00000031536	ENSMUST00000033938	full-splice_match	1201	1717
Mouse	ENSMUSG00000061086	ENSMUST00000123074	full-splice_match	677	1716
Mouse	ENSMUSG00000007850	transcript6077.11.nnic	novel_not_in_catalog	1155	1715
Mouse	ENSMUSG00000020250	ENSMUST00000020484	full-splice_match	3325	1712
Mouse	ENSMUSG00000022216	ENSMUST00000174259	full-splice_match	1112	1712
Mouse	novelGene_ENSMUSG00000036782_AS	transcript1642.X.nnic	antisense	2046	1712
Mouse	ENSMUSG00000067787	ENSMUST00000109528	full-splice_match	2056	1711
Mouse	ENSMUSG00000014959	ENSMUST00000028509	full-splice_match	2238	1708
Mouse	ENSMUSG00000024067	ENSMUST00000233581	full-splice_match	734	1705
Mouse	ENSMUSG00000029777	ENSMUST00000003572	full-splice_match	2380	1704
Mouse	ENSMUSG00000035152	ENSMUST00000018875	full-splice_match	5625	1704
Mouse	ENSMUSG00000037935	transcript20827.11.nnic	novel_not_in_catalog	985	1704
Mouse	ENSMUSG00000036748	transcript9803.19.nnic	novel_not_in_catalog	1110	1703
Mouse	ENSMUSG00000020849	transcript14740.11.nnic	novel_in_catalog	1126	1702
Mouse	ENSMUSG00000037740	ENSMUST00000046149	full-splice_match	1057	1701
Mouse	ENSMUSG00000001416	ENSMUST00000001452	full-splice_match	1977	1701
Mouse	ENSMUSG00000039105	ENSMUST00000035301	full-splice_match	1135	1701
Mouse	ENSMUSG00000039361	transcript18119.7.nic	incomplete-splice_match	2515	1701
Mouse	ENSMUSG00000026154	ENSMUST00000027338	full-splice_match	683	1697
Mouse	ENSMUSG00000024387	ENSMUST00000174779	full-splice_match	632	1697
Mouse	ENSMUSG00000031311	ENSMUST00000033673	full-splice_match	2562	1697
Mouse	ENSMUSG00000030120	ENSMUST00000032214	full-splice_match	1451	1696
Mouse	ENSMUSG00000022109	ENSMUST00000022705	full-splice_match	1328	1694
Mouse	ENSMUSG00000057530	ENSMUST00000102518	full-splice_match	4816	1693
Mouse	ENSMUSG00000002395	ENSMUST00000143657	full-splice_match	930	1693
Mouse	ENSMUSG00000057113	ENSMUST00000109354	full-splice_match	1157	1693
Mouse	ENSMUSG00000020949	ENSMUST00000221166	full-splice_match	981	1693
Mouse	ENSMUSG00000024927	ENSMUST00000025867	full-splice_match	2716	1690
Mouse	ENSMUSG00000030403	ENSMUST00000032561	full-splice_match	2215	1689
Mouse	ENSMUSG00000021190	ENSMUST00000110020	full-splice_match	1835	1689
Mouse	ENSMUSG00000022456	ENSMUST00000023095	full-splice_match	4992	1689
Mouse	ENSMUSG00000063019	ENSMUST00000081202	full-splice_match	1107	1688
Mouse	ENSMUSG00000028868	ENSMUST00000084241	full-splice_match	5642	1688
Mouse	ENSMUSG00000020496	transcript8169.11.nnic	novel_not_in_catalog	569	1688
Mouse	ENSMUSG00000027091	ENSMUST00000134789	full-splice_match	1407	1687
Mouse	ENSMUSG00000052852	ENSMUST00000121469	full-splice_match	3924	1687
Mouse	ENSMUSG00000038696	ENSMUST00000147337	full-splice_match	3111	1681
Mouse	ENSMUSG00000026623	ENSMUST00000110855	full-splice_match	7233	1680
Mouse	ENSMUSG00000085438	transcript14678.2.nnic	novel_not_in_catalog	1374	1680
Mouse	ENSMUSG00000002748	ENSMUST00000002825	full-splice_match	6492	1680
Mouse	ENSMUSG00000033629	ENSMUST00000036615	full-splice_match	2709	1680
Mouse	ENSMUSG00000044408	ENSMUST00000056228	full-splice_match	1346	1678
Mouse	ENSMUSG00000025871	ENSMUST00000153065	full-splice_match	2502	1678
Mouse	ENSMUSG00000030744	ENSMUST00000032998	full-splice_match	1908	1677
Mouse	ENSMUSG00000051510	ENSMUST00000058162	full-splice_match	4923	1677
Mouse	ENSMUSG00000081214	ENSMUST00000117444	full-splice_match	333	1672
Mouse	ENSMUSG00000019432	transcript9971.17.nic	novel_in_catalog	1518	1672
Mouse	ENSMUSG00000069565	transcript8607.10.nic	incomplete-splice_match	1275	1670
Mouse	ENSMUSG00000016382	ENSMUST00000114059	full-splice_match	3149	1670
Mouse	ENSMUSG00000027613	ENSMUST00000029142	full-splice_match	1500	1669
Mouse	ENSMUSG00000004891	ENSMUST00000090973	full-splice_match	6126	1668
Mouse	ENSMUSG00000040856	ENSMUST00000109844	full-splice_match	1703	1667
Mouse	ENSMUSG00000024576	ENSMUST00000165123	full-splice_match	4083	1667
Mouse	ENSMUSG00000038324	ENSMUST00000041059	full-splice_match	3204	1666
Mouse	ENSMUSG00000046516	ENSMUST00000050273	full-splice_match	444	1666
Mouse	ENSMUSG00000026511	ENSMUST00000027792	full-splice_match	1367	1665
Mouse	ENSMUSG00000020893	transcript11164.11.nic	incomplete-splice_match	2015	1665
Mouse	ENSMUSG00000047710	ENSMUST00000051870	full-splice_match	4013	1664
Mouse	ENSMUSG00000021288	transcript11101.12.nnic	novel_not_in_catalog	560	1662
Mouse	ENSMUSG00000067377	ENSMUST00000087557	full-splice_match	1765	1662
Mouse	ENSMUSG00000061104	ENSMUST00000074053	full-splice_match	789	1660
Mouse	ENSMUSG00000037138	ENSMUST00000095027	full-splice_match	5857	1658
Mouse	ENSMUSG00000028643	ENSMUST00000106345	full-splice_match	684	1658
Mouse	ENSMUSG00000092203	ENSMUST00000172501	full-splice_match	579	1655
Mouse	ENSMUSG00000026568	ENSMUST00000138999	full-splice_match	493	1654
Mouse	ENSMUSG00000028032	ENSMUST00000029666	full-splice_match	2600	1654
Mouse	ENSMUSG00000001175	ENSMUST00000127300	full-splice_match	549	1654
Mouse	ENSMUSG00000028796	ENSMUST00000143632	full-splice_match	2417	1653
Mouse	ENSMUSG00000027247	ENSMUST00000111331	full-splice_match	2883	1650
Mouse	ENSMUSG00000041355	ENSMUST00000195014	full-splice_match	1059	1649
Mouse	ENSMUSG00000035781	ENSMUST00000045628	full-splice_match	1898	1649
Mouse	ENSMUSG00000025190	ENSMUST00000026196	full-splice_match	2058	1649
Mouse	ENSMUSG00000006442	transcript18780.4.nnic	novel_not_in_catalog	1174	1646
Mouse	ENSMUSG00000030744	ENSMUST00000208532	full-splice_match	489	1645
Mouse	ENSMUSG00000005125	ENSMUST00000005256	full-splice_match	2889	1644
Mouse	ENSMUSG00000029036	ENSMUST00000030903	full-splice_match	2413	1643
Mouse	ENSMUSG00000020601	ENSMUST00000020922	full-splice_match	4198	1643
Mouse	ENSMUSG00000031979	ENSMUST00000034460	full-splice_match	2825	1642
Mouse	ENSMUSG00000052406	transcript3790.2.nnic	novel_in_catalog	2061	1641
Mouse	ENSMUSG00000024966	ENSMUST00000025918	full-splice_match	2173	1641
Mouse	ENSMUSG00000071451	ENSMUST00000147632	full-splice_match	555	1638
Mouse	novelGene_ENSMUSG00000029385_AS	transcript8163.5.nnic	antisense	1512	1636
Mouse	ENSMUSG00000034341	ENSMUST00000074628	full-splice_match	1826	1636
Mouse	ENSMUSG00000022564	ENSMUST00000023225	full-splice_match	1725	1635
Mouse	ENSMUSG00000055980	ENSMUST00000069799	full-splice_match	9144	1634
Mouse	ENSMUSG00000005447	ENSMUST00000005583	full-splice_match	901	1634
Mouse	ENSMUSG00000026918	transcript3943.2.nnic	novel_not_in_catalog	885	1633
Mouse	ENSMUSG00000021973	transcript7534.14.nnic	novel_not_in_catalog	1021	1633
Mouse	ENSMUSG00000027189	ENSMUST00000102573	full-splice_match	5612	1630
Mouse	ENSMUSG00000033272	ENSMUST00000050476	full-splice_match	2362	1630
Mouse	ENSMUSG00000044265	ENSMUST00000051137	full-splice_match	2268	1629
Mouse	ENSMUSG00000001555	ENSMUST00000001595	full-splice_match	2584	1629
Mouse	ENSMUSG00000049760	ENSMUST00000233103	full-splice_match	497	1629
Mouse	ENSMUSG00000033022	ENSMUST00000234819	full-splice_match	1466	1629
Mouse	ENSMUSG00000007721	ENSMUST00000007865	full-splice_match	1356	1628
Mouse	ENSMUSG00000005566	ENSMUST00000005705	full-splice_match	3245	1627
Mouse	ENSMUSG00000011958	ENSMUST00000085393	full-splice_match	2328	1627
Mouse	ENSMUSG00000008036	transcript3235.7.nnic	novel_not_in_catalog	987	1625
Mouse	ENSMUSG00000068220	ENSMUST00000089377	full-splice_match	800	1623
Mouse	ENSMUSG00000042745	ENSMUST00000038368	full-splice_match	934	1622
Mouse	ENSMUSG00000009575	ENSMUST00000118152	full-splice_match	8803	1622
Mouse	ENSMUSG00000060019	ENSMUST00000073722	full-splice_match	496	1621
Mouse	ENSMUSG00000039515	ENSMUST00000042055	full-splice_match	2586	1619
Mouse	ENSMUSG00000021681	ENSMUST00000022189	full-splice_match	3249	1619
Mouse	ENSMUSG00000090000	ENSMUST00000026487	full-splice_match	1395	1618
Mouse	ENSMUSG00000027429	ENSMUST00000028916	full-splice_match	2779	1617
Mouse	ENSMUSG00000025794	ENSMUST00000165532	full-splice_match	1009	1617
Mouse	ENSMUSG00000030168	ENSMUST00000032272	full-splice_match	4184	1614
Mouse	ENSMUSG00000041126	ENSMUST00000093346	full-splice_match	519	1614
Mouse	ENSMUSG00000028937	ENSMUST00000075363	full-splice_match	1457	1613
Mouse	ENSMUSG00000040028	ENSMUST00000209010	full-splice_match	2317	1612
Mouse	ENSMUSG00000106106	transcript11555.17.nnic	genic	431	1612
Mouse	ENSMUSG00000064370	transcript788.MT.nnic	genic	310	1612
Mouse	ENSMUSG00000066705	transcript5030.9.nnic	novel_not_in_catalog	532	1610
Mouse	ENSMUSG00000045948	ENSMUST00000056078	full-splice_match	722	1609
Mouse	ENSMUSG00000070319	ENSMUST00000004206	full-splice_match	1101	1609
Mouse	ENSMUSG00000009291	ENSMUST00000009435	full-splice_match	2294	1609
Mouse	ENSMUSG00000033047	transcript7358.15.nnic	novel_not_in_catalog	1097	1609
Mouse	ENSMUSG00000024835	ENSMUST00000008893	full-splice_match	1888	1609
Mouse	ENSMUSG00000003429	ENSMUST00000211725	full-splice_match	493	1608
Mouse	ENSMUSG00000022443	ENSMUST00000016771	full-splice_match	7433	1608
Mouse	ENSMUSG00000022577	ENSMUST00000023241	full-splice_match	906	1607
Mouse	ENSMUSG00000028478	ENSMUST00000107846	full-splice_match	1710	1605
Mouse	ENSMUSG00000019039	transcript16970.9.nnic	novel_not_in_catalog	1194	1603
Mouse	ENSMUSG00000024735	ENSMUST00000025642	full-splice_match	2134	1603
Mouse	ENSMUSG00000024570	ENSMUST00000025462	full-splice_match	1377	1602
Mouse	novelGene_ENSMUSG00000022010_AS	transcript10067.14.nnic	antisense	525	1600
Mouse	ENSMUSG00000022205	ENSMUST00000022816	full-splice_match	3372	1599
Mouse	ENSMUSG00000022391	ENSMUST00000052374	full-splice_match	3033	1597
Mouse	ENSMUSG00000013465	ENSMUST00000059849	full-splice_match	2637	1595
Mouse	ENSMUSG00000019370	ENSMUST00000019514	full-splice_match	2290	1595
Mouse	ENSMUSG00000087260	ENSMUST00000199317	full-splice_match	743	1594
Mouse	ENSMUSG00000022895	ENSMUST00000233578	full-splice_match	3312	1592
Mouse	ENSMUSG00000022257	ENSMUST00000226437	full-splice_match	1662	1591
Mouse	ENSMUSG00000031875	ENSMUST00000034343	full-splice_match	1616	1588
Mouse	ENSMUSG00000026459	ENSMUST00000027730	full-splice_match	1495	1587
Mouse	ENSMUSG00000024026	transcript6929.17.nnic	novel_not_in_catalog	501	1587
Mouse	ENSMUSG00000032301	transcript6781.9.nnic	novel_not_in_catalog	656	1586
Mouse	ENSMUSG00000045573	transcript294.4.nnic	novel_not_in_catalog	1249	1584
Mouse	ENSMUSG00000027879	ENSMUST00000130778	full-splice_match	1355	1582
Mouse	ENSMUSG00000027076	ENSMUST00000028470	full-splice_match	690	1580
Mouse	ENSMUSG00000031622	ENSMUST00000109950	full-splice_match	1024	1580
Mouse	ENSMUSG00000029147	ENSMUST00000031032	full-splice_match	2307	1579
Mouse	novelGene_ENSMUSG00000018326_AS	transcript23180.2.nnic	antisense	818	1578
Mouse	ENSMUSG00000025487	ENSMUST00000026560	full-splice_match	1989	1578
Mouse	ENSMUSG00000025823	ENSMUST00000077290	full-splice_match	2399	1575
Mouse	ENSMUSG00000015291	transcript4498.X.nnic	novel_not_in_catalog	598	1574
Mouse	novelGene_ENSMUSG00000024247_AS	transcript17738.17.nnic	antisense	1282	1573
Mouse	novelGene_ENSMUSG00000027828_AS	transcript4225.3.nnic	antisense	250	1572
Mouse	ENSMUSG00000027133	transcript13367.2.nnic	novel_not_in_catalog	427	1571
Mouse	ENSMUSG00000028792	ENSMUST00000102604	full-splice_match	1781	1571
Mouse	ENSMUSG00000035203	ENSMUST00000208634	full-splice_match	2127	1571
Mouse	ENSMUSG00000002010	ENSMUST00000052761	full-splice_match	1331	1570
Mouse	ENSMUSG00000025492	ENSMUST00000026565	full-splice_match	678	1569
Mouse	ENSMUSG00000025027	transcript10610.19.nic	novel_in_catalog	2418	1568
Mouse	ENSMUSG00000028464	ENSMUST00000107914	full-splice_match	1164	1567
Mouse	ENSMUSG00000053907	ENSMUST00000205823	full-splice_match	590	1564
Mouse	ENSMUSG00000021709	transcript10822.13.nnic	novel_not_in_catalog	2620	1564
Mouse	ENSMUSG00000030605	ENSMUST00000107409	full-splice_match	2008	1563
Mouse	ENSMUSG00000063065	transcript25140.7.nnic	novel_not_in_catalog	1036	1561
Mouse	ENSMUSG00000019761	ENSMUST00000211768	full-splice_match	557	1561
Mouse	ENSMUSG00000029462	ENSMUST00000118830	full-splice_match	1014	1559
Mouse	ENSMUSG00000030057	ENSMUST00000204890	full-splice_match	1614	1559
Mouse	ENSMUSG00000001911	ENSMUST00000109764	full-splice_match	5476	1559
Mouse	ENSMUSG00000062098	ENSMUST00000091556	full-splice_match	4657	1558
Mouse	ENSMUSG00000030842	ENSMUST00000033131	full-splice_match	1119	1556
Mouse	ENSMUSG00000024997	transcript11530.19.nnic	novel_not_in_catalog	1335	1554
Mouse	ENSMUSG00000020484	ENSMUST00000063084	full-splice_match	2129	1553
Mouse	ENSMUSG00000056629	ENSMUST00000177752	full-splice_match	627	1553
Mouse	ENSMUSG00000018446	transcript13486.11.nnic	novel_not_in_catalog	520	1551
Mouse	ENSMUSG00000026889	ENSMUST00000028251	full-splice_match	2617	1550
Mouse	ENSMUSG00000037152	ENSMUST00000145572	full-splice_match	311	1550
Mouse	ENSMUSG00000028597	ENSMUST00000030332	full-splice_match	1289	1550
Mouse	ENSMUSG00000028964	ENSMUST00000030805	full-splice_match	908	1550
Mouse	ENSMUSG00000047238	ENSMUST00000051484	full-splice_match	1410	1550
Mouse	ENSMUSG00000026249	transcript7878.1.nnic	novel_not_in_catalog	594	1549
Mouse	ENSMUSG00000048040	ENSMUST00000058119	full-splice_match	1532	1549
Mouse	ENSMUSG00000074480	ENSMUST00000172699	full-splice_match	5778	1548
Mouse	ENSMUSG00000035202	ENSMUST00000038863	full-splice_match	3894	1546
Mouse	ENSMUSG00000034659	ENSMUST00000038128	full-splice_match	2188	1546
Mouse	ENSMUSG00000021577	ENSMUST00000022062	full-splice_match	2900	1545
Mouse	ENSMUSG00000027805	ENSMUST00000119344	full-splice_match	1879	1544
Mouse	ENSMUSG00000020444	ENSMUST00000170202	full-splice_match	1078	1542
Mouse	ENSMUSG00000027455	ENSMUST00000028949	full-splice_match	1364	1538
Mouse	ENSMUSG00000052911	ENSMUST00000065014	full-splice_match	5629	1538
Mouse	ENSMUSG00000025579	ENSMUST00000106259	full-splice_match	3633	1536
Mouse	ENSMUSG00000048332	ENSMUST00000059562	full-splice_match	2108	1535
Mouse	ENSMUSG00000066324	ENSMUST00000084949	full-splice_match	6543	1535
Mouse	ENSMUSG00000029152	ENSMUST00000201739	full-splice_match	798	1535
Mouse	ENSMUSG00000008859	ENSMUST00000009003	full-splice_match	2688	1533
Mouse	ENSMUSG00000059495	ENSMUST00000165665	full-splice_match	10752	1532
Mouse	ENSMUSG00000025228	ENSMUST00000040270	full-splice_match	2742	1532
Mouse	ENSMUSG00000019920	ENSMUST00000020078	full-splice_match	4327	1531
Mouse	ENSMUSG00000021474	ENSMUST00000021930	full-splice_match	2783	1530
Mouse	ENSMUSG00000042305	ENSMUST00000049470	full-splice_match	3149	1528
Mouse	ENSMUSG00000015095	ENSMUST00000015239	full-splice_match	2388	1528
Mouse	novelGene_ENSMUSG00000039630_AS	transcript18360.1.nnic	antisense	521	1527
Mouse	ENSMUSG00000026837	ENSMUST00000028280	full-splice_match	8406	1527
Mouse	ENSMUSG00000038612	ENSMUST00000037947	full-splice_match	3418	1526
Mouse	ENSMUSG00000030017	ENSMUST00000032089	full-splice_match	771	1526
Mouse	novelGene_ENSMUSG00000027239_AS	transcript11635.2.nnic	antisense	238	1525
Mouse	ENSMUSG00000020473	ENSMUST00000102923	full-splice_match	3831	1525
Mouse	ENSMUSG00000018848	ENSMUST00000018992	full-splice_match	2109	1524
Mouse	ENSMUSG00000028766	ENSMUST00000030551	full-splice_match	2522	1523
Mouse	ENSMUSG00000035478	ENSMUST00000142997	full-splice_match	1118	1523
Mouse	ENSMUSG00000029070	ENSMUST00000030947	full-splice_match	2203	1522
Mouse	ENSMUSG00000029126	transcript4512.5.nnic	novel_not_in_catalog	1633	1522
Mouse	ENSMUSG00000046434	ENSMUST00000231141	full-splice_match	1541	1521
Mouse	ENSMUSG00000026355	ENSMUST00000027601	full-splice_match	2910	1520
Mouse	ENSMUSG00000053332	ENSMUST00000162558	full-splice_match	502	1520
Mouse	ENSMUSG00000026078	ENSMUST00000193073	full-splice_match	944	1517
Mouse	ENSMUSG00000017144	ENSMUST00000017288	full-splice_match	2828	1517
Mouse	ENSMUSG00000028333	transcript4326.4.nnic	novel_not_in_catalog	577	1515
Mouse	ENSMUSG00000031879	ENSMUST00000164884	full-splice_match	918	1515
Mouse	ENSMUSG00000012076	ENSMUST00000059250	full-splice_match	2609	1515
Mouse	ENSMUSG00000031948	ENSMUST00000093120	full-splice_match	2131	1512
Mouse	ENSMUSG00000023008	ENSMUST00000088233	full-splice_match	4423	1510
Mouse	ENSMUSG00000025223	ENSMUST00000056931	full-splice_match	2295	1509
Mouse	ENSMUSG00000013921	ENSMUST00000014065	full-splice_match	3300	1508
Mouse	ENSMUSG00000040850	ENSMUST00000041231	full-splice_match	6491	1507
Mouse	ENSMUSG00000058799	ENSMUST00000218828	full-splice_match	3934	1506
Mouse	ENSMUSG00000045545	ENSMUST00000137265	full-splice_match	1122	1506
Mouse	ENSMUSG00000030061	ENSMUST00000089287	full-splice_match	2257	1503
Mouse	ENSMUSG00000032301	ENSMUST00000034848	full-splice_match	1165	1500
Mouse	ENSMUSG00000004771	ENSMUST00000172298	full-splice_match	2336	1500
Mouse	ENSMUSG00000016559	ENSMUST00000016703	full-splice_match	1993	1500
Mouse	ENSMUSG00000041712	ENSMUST00000046404	full-splice_match	3261	1499
Mouse	ENSMUSG00000036766	ENSMUST00000049126	full-splice_match	3632	1498
Mouse	ENSMUSG00000027404	transcript17110.2.nnic	novel_not_in_catalog	331	1498
Mouse	ENSMUSG00000010608	ENSMUST00000048155	full-splice_match	4226	1498
Mouse	ENSMUSG00000028248	ENSMUST00000029911	full-splice_match	4545	1495
Mouse	ENSMUSG00000028961	ENSMUST00000084124	full-splice_match	2218	1495
Mouse	ENSMUSG00000030796	ENSMUST00000033060	full-splice_match	2140	1495
Mouse	ENSMUSG00000024944	ENSMUST00000025893	full-splice_match	1144	1494
Mouse	ENSMUSG00000037608	ENSMUST00000092678	full-splice_match	5307	1491
Mouse	ENSMUSG00000078453	ENSMUST00000020002	full-splice_match	846	1483
Mouse	ENSMUSG00000016487	ENSMUST00000123902	full-splice_match	5118	1481
Mouse	ENSMUSG00000005779	ENSMUST00000134133	full-splice_match	292	1479
Mouse	ENSMUSG00000066306	ENSMUST00000084852	full-splice_match	7180	1478
Mouse	novelGene_ENSMUSG00000032228_AS	transcript11492.9.nnic	antisense	1476	1478
Mouse	ENSMUSG00000026179	ENSMUST00000113805	full-splice_match	740	1476
Mouse	ENSMUSG00000035840	ENSMUST00000224300	full-splice_match	4250	1476
Mouse	ENSMUSG00000022031	transcript8361.14.nnic	novel_not_in_catalog	1710	1476
Mouse	ENSMUSG00000031848	ENSMUST00000034311	full-splice_match	925	1475
Mouse	ENSMUSG00000032249	ENSMUST00000085519	full-splice_match	2113	1475
Mouse	ENSMUSG00000030870	ENSMUST00000033158	full-splice_match	4849	1473
Mouse	ENSMUSG00000031137	ENSMUST00000033473	full-splice_match	2499	1473
Mouse	ENSMUSG00000022553	ENSMUST00000160172	full-splice_match	1537	1472
Mouse	ENSMUSG00000070639	ENSMUST00000112707	full-splice_match	6726	1471
Mouse	ENSMUSG00000044221	ENSMUST00000113234	full-splice_match	2286	1471
Mouse	ENSMUSG00000002395	ENSMUST00000019169	full-splice_match	854	1470
Mouse	ENSMUSG00000078578	ENSMUST00000106291	full-splice_match	1512	1469
Mouse	ENSMUSG00000005447	ENSMUST00000140093	full-splice_match	833	1469
Mouse	ENSMUSG00000034336	ENSMUST00000037636	full-splice_match	3240	1469
Mouse	ENSMUSG00000068735	ENSMUST00000090554	full-splice_match	2654	1468
Mouse	ENSMUSG00000006369	ENSMUST00000109432	full-splice_match	2273	1468
Mouse	ENSMUSG00000038762	ENSMUST00000043757	full-splice_match	3161	1468
Mouse	ENSMUSG00000016833	ENSMUST00000016977	full-splice_match	638	1466
Mouse	ENSMUSG00000043388	ENSMUST00000061446	full-splice_match	2805	1466
Mouse	ENSMUSG00000005161	ENSMUST00000127215	full-splice_match	549	1466
Mouse	ENSMUSG00000016257	ENSMUST00000016401	full-splice_match	1553	1464
Mouse	ENSMUSG00000042744	ENSMUST00000042614	full-splice_match	15482	1463
Mouse	ENSMUSG00000035199	ENSMUST00000044681	full-splice_match	1442	1463
Mouse	ENSMUSG00000019471	transcript1589.9.nic	novel_in_catalog	1816	1463
Mouse	ENSMUSG00000053838	ENSMUST00000109805	full-splice_match	2635	1463
Mouse	ENSMUSG00000053093	transcript6235.14.nic	incomplete-splice_match	1474	1463
Mouse	ENSMUSG00000015478	ENSMUST00000015622	full-splice_match	1238	1463
Mouse	ENSMUSG00000029103	ENSMUST00000030986	full-splice_match	2981	1462
Mouse	ENSMUSG00000038127	ENSMUST00000100026	full-splice_match	7089	1461
Mouse	ENSMUSG00000034189	ENSMUST00000036049	full-splice_match	3141	1459
Mouse	ENSMUSG00000032293	ENSMUST00000034843	full-splice_match	5770	1458
Mouse	ENSMUSG00000022351	ENSMUST00000022977	full-splice_match	2758	1455
Mouse	ENSMUSG00000024026	ENSMUST00000024823	full-splice_match	1935	1455
Mouse	ENSMUSG00000079658	ENSMUST00000115352	full-splice_match	960	1453
Mouse	ENSMUSG00000041120	ENSMUST00000042844	full-splice_match	1793	1452
Mouse	ENSMUSG00000023460	transcript16227.17.nic	incomplete-splice_match	1627	1452
Mouse	ENSMUSG00000056211	ENSMUST00000188570	full-splice_match	1588	1450
Mouse	ENSMUSG00000042705	ENSMUST00000049388	full-splice_match	1610	1450
Mouse	ENSMUSG00000004655	ENSMUST00000004774	full-splice_match	2627	1449
Mouse	ENSMUSG00000062694	ENSMUST00000075477	full-splice_match	1157	1448
Mouse	ENSMUSG00000022452	ENSMUST00000161892	full-splice_match	597	1448
Mouse	ENSMUSG00000047866	ENSMUST00000122188	full-splice_match	2372	1446
Mouse	ENSMUSG00000020457	ENSMUST00000020741	full-splice_match	1546	1446
Mouse	ENSMUSG00000051255	ENSMUST00000056396	full-splice_match	869	1446
Mouse	ENSMUSG00000001865	ENSMUST00000001921	full-splice_match	1449	1445
Mouse	ENSMUSG00000038502	transcript11734.7.nnic	novel_not_in_catalog	958	1445
Mouse	ENSMUSG00000034634	ENSMUST00000040404	full-splice_match	744	1445
Mouse	ENSMUSG00000023904	transcript2526.17.nnic	novel_not_in_catalog	928	1444
Mouse	ENSMUSG00000032312	ENSMUST00000034863	full-splice_match	2749	1441
Mouse	ENSMUSG00000027375	ENSMUST00000028854	full-splice_match	2778	1440
Mouse	ENSMUSG00000062908	ENSMUST00000072697	full-splice_match	2047	1440
Mouse	ENSMUSG00000031776	ENSMUST00000034228	full-splice_match	2063	1440
Mouse	ENSMUSG00000020946	ENSMUST00000021329	full-splice_match	3266	1440
Mouse	ENSMUSG00000024277	ENSMUST00000025127	full-splice_match	4026	1438
Mouse	ENSMUSG00000029163	transcript2502.5.nnic	novel_not_in_catalog	2331	1437
Mouse	ENSMUSG00000028646	ENSMUST00000155757	full-splice_match	2950	1433
Mouse	ENSMUSG00000062210	ENSMUST00000148159	full-splice_match	1921	1432
Mouse	ENSMUSG00000034781	ENSMUST00000043604	full-splice_match	3414	1430
Mouse	ENSMUSG00000027199	ENSMUST00000028624	full-splice_match	2389	1429
Mouse	ENSMUSG00000027230	ENSMUST00000028663	full-splice_match	2603	1429
Mouse	ENSMUSG00000025337	ENSMUST00000026387	full-splice_match	1548	1429
Mouse	ENSMUSG00000078812	ENSMUST00000108613	full-splice_match	1343	1429
Mouse	ENSMUSG00000042726	ENSMUST00000202064	full-splice_match	890	1424
Mouse	ENSMUSG00000054905	ENSMUST00000068182	full-splice_match	412	1424
Mouse	ENSMUSG00000044986	ENSMUST00000058659	full-splice_match	1144	1423
Mouse	ENSMUSG00000032097	transcript4673.9.nnic	novel_not_in_catalog	851	1422
Mouse	novelGene_ENSMUSG00000031871_AS	transcript12614.8.nnic	antisense	1371	1421
Mouse	ENSMUSG00000033940	ENSMUST00000035725	full-splice_match	1095	1420
Mouse	ENSMUSG00000022817	ENSMUST00000232262	full-splice_match	2130	1420
Mouse	ENSMUSG00000004885	ENSMUST00000005019	full-splice_match	931	1419
Mouse	ENSMUSG00000058135	ENSMUST00000198532	full-splice_match	597	1419
Mouse	ENSMUSG00000029163	ENSMUST00000031055	full-splice_match	3852	1419
Mouse	ENSMUSG00000094910	ENSMUST00000178224	full-splice_match	5786	1418
Mouse	ENSMUSG00000026500	ENSMUST00000027781	full-splice_match	471	1417
Mouse	ENSMUSG00000028347	ENSMUST00000030032	full-splice_match	2461	1417
Mouse	ENSMUSG00000035770	ENSMUST00000041769	full-splice_match	4627	1417
Mouse	ENSMUSG00000031245	ENSMUST00000033597	full-splice_match	1934	1417
Mouse	ENSMUSG00000024360	ENSMUST00000025218	full-splice_match	3709	1416
Mouse	ENSMUSG00000019970	ENSMUST00000020145	full-splice_match	2456	1412
Mouse	ENSMUSG00000053329	ENSMUST00000001242	full-splice_match	1378	1411
Mouse	ENSMUSG00000020153	ENSMUST00000105364	full-splice_match	983	1411
Mouse	ENSMUSG00000020737	ENSMUST00000139980	full-splice_match	650	1411
Mouse	ENSMUSG00000029622	transcript20485.5.nnic	novel_not_in_catalog	585	1410
Mouse	ENSMUSG00000062515	ENSMUST00000029041	full-splice_match	896	1409
Mouse	ENSMUSG00000014294	ENSMUST00000014438	full-splice_match	572	1409
Mouse	ENSMUSG00000079435	ENSMUST00000113211	full-splice_match	483	1408
Mouse	ENSMUSG00000039953	transcript19165.4.nnic	novel_not_in_catalog	576	1407
Mouse	ENSMUSG00000059278	ENSMUST00000124932	full-splice_match	404	1407
Mouse	ENSMUSG00000031840	ENSMUST00000034301	full-splice_match	1363	1405
Mouse	ENSMUSG00000021248	ENSMUST00000222529	full-splice_match	3181	1405
Mouse	ENSMUSG00000047686	ENSMUST00000062010	full-splice_match	2948	1405
Mouse	ENSMUSG00000000339	ENSMUST00000000348	full-splice_match	1594	1404
Mouse	ENSMUSG00000031782	ENSMUST00000034234	full-splice_match	1789	1400
Mouse	ENSMUSG00000026235	ENSMUST00000027451	full-splice_match	6328	1398
Mouse	ENSMUSG00000032640	ENSMUST00000036372	full-splice_match	4176	1396
Mouse	ENSMUSG00000037625	ENSMUST00000046174	full-splice_match	1870	1395
Mouse	ENSMUSG00000021027	transcript3839.12.nnic	novel_not_in_catalog	2266	1394
Mouse	ENSMUSG00000029446	ENSMUST00000031399	full-splice_match	1733	1393
Mouse	ENSMUSG00000020198	ENSMUST00000020420	full-splice_match	4805	1393
Mouse	ENSMUSG00000022433	ENSMUST00000117786	full-splice_match	2694	1393
Mouse	ENSMUSG00000009630	transcript3310.8.nnic	novel_not_in_catalog	1637	1392
Mouse	ENSMUSG00000014504	ENSMUST00000072576	full-splice_match	876	1392
Mouse	ENSMUSG00000060803	ENSMUST00000169613	full-splice_match	757	1392
Mouse	ENSMUSG00000024181	ENSMUST00000025014	full-splice_match	1048	1391
Mouse	ENSMUSG00000015149	ENSMUST00000170068	full-splice_match	1585	1390
Mouse	ENSMUSG00000035493	ENSMUST00000045173	full-splice_match	2714	1390
Mouse	ENSMUSG00000049339	ENSMUST00000097694	full-splice_match	2561	1388
Mouse	ENSMUSG00000026810	ENSMUST00000028151	full-splice_match	869	1388
Mouse	ENSMUSG00000036873	ENSMUST00000190472	full-splice_match	724	1388
Mouse	ENSMUSG00000062981	ENSMUST00000218893	full-splice_match	661	1387
Mouse	ENSMUSG00000005936	ENSMUST00000118762	full-splice_match	3853	1387
Mouse	ENSMUSG00000035686	ENSMUST00000043077	full-splice_match	1277	1386
Mouse	ENSMUSG00000061313	ENSMUST00000033975	full-splice_match	4245	1386
Mouse	ENSMUSG00000003363	ENSMUST00000117095	full-splice_match	2282	1385
Mouse	ENSMUSG00000004788	ENSMUST00000130760	full-splice_match	587	1385
Mouse	ENSMUSG00000003380	ENSMUST00000076961	full-splice_match	899	1384
Mouse	ENSMUSG00000044502	ENSMUST00000058060	full-splice_match	1394	1383
Mouse	ENSMUSG00000055932	ENSMUST00000069718	full-splice_match	3564	1382
Mouse	ENSMUSG00000057604	ENSMUST00000032376	full-splice_match	1730	1381
Mouse	ENSMUSG00000013787	ENSMUST00000124002	full-splice_match	1359	1381
Mouse	ENSMUSG00000014769	ENSMUST00000231341	full-splice_match	1970	1381
Mouse	ENSMUSG00000018761	ENSMUST00000018905	full-splice_match	1321	1380
Mouse	ENSMUSG00000037892	ENSMUST00000035931	full-splice_match	5168	1379
Mouse	ENSMUSG00000018736	ENSMUST00000018880	full-splice_match	2382	1377
Mouse	ENSMUSG00000054364	ENSMUST00000067384	full-splice_match	2349	1377
Mouse	ENSMUSG00000005656	transcript3417.12.nnic	novel_not_in_catalog	2027	1377
Mouse	ENSMUSG00000002289	ENSMUST00000173869	full-splice_match	1859	1377
Mouse	ENSMUSG00000030224	ENSMUST00000064910	full-splice_match	2650	1376
Mouse	ENSMUSG00000074227	ENSMUST00000108236	full-splice_match	1211	1376
Mouse	ENSMUSG00000017493	transcript20781.11.nnic	novel_not_in_catalog	724	1376
Mouse	ENSMUSG00000021486	ENSMUST00000224220	full-splice_match	1204	1376
Mouse	ENSMUSG00000001525	transcript10617.17.nnic	novel_not_in_catalog	342	1376
Mouse	ENSMUSG00000067071	ENSMUST00000132188	full-splice_match	1398	1375
Mouse	ENSMUSG00000034707	ENSMUST00000040344	full-splice_match	3855	1375
Mouse	ENSMUSG00000028851	ENSMUST00000030665	full-splice_match	1316	1374
Mouse	ENSMUSG00000031701	ENSMUST00000034138	full-splice_match	2919	1373
Mouse	ENSMUSG00000024194	ENSMUST00000025027	full-splice_match	639	1372
Mouse	ENSMUSG00000036315	ENSMUST00000113669	full-splice_match	742	1371
Mouse	ENSMUSG00000060147	transcript1970.13.nnic	novel_not_in_catalog	1553	1370
Mouse	ENSMUSG00000027433	ENSMUST00000028921	full-splice_match	3434	1368
Mouse	ENSMUSG00000029810	ENSMUST00000166247	full-splice_match	1414	1367
Mouse	ENSMUSG00000024067	ENSMUST00000232687	full-splice_match	694	1366
Mouse	ENSMUSG00000024590	ENSMUST00000025486	full-splice_match	2843	1366
Mouse	ENSMUSG00000046432	ENSMUST00000113113	full-splice_match	766	1366
Mouse	ENSMUSG00000026360	transcript13768.1.nnic	novel_not_in_catalog	1905	1364
Mouse	ENSMUSG00000022883	ENSMUST00000023600	full-splice_match	7563	1364
Mouse	ENSMUSG00000031004	transcript27613.7.nnic	novel_not_in_catalog	949	1363
Mouse	ENSMUSG00000031556	ENSMUST00000033961	full-splice_match	1281	1363
Mouse	ENSMUSG00000024587	transcript5878.18.nnic	novel_not_in_catalog	1186	1363
Mouse	ENSMUSG00000020695	ENSMUST00000100335	full-splice_match	5795	1362
Mouse	ENSMUSG00000038301	ENSMUST00000049152	full-splice_match	2480	1361
Mouse	ENSMUSG00000027195	ENSMUST00000127084	full-splice_match	1758	1359
Mouse	ENSMUSG00000003402	ENSMUST00000115331	full-splice_match	1983	1359
Mouse	ENSMUSG00000029661	transcript290.6.nnic	novel_not_in_catalog	512	1358
Mouse	ENSMUSG00000037712	transcript4362.14.nic	incomplete-splice_match	1752	1358
Mouse	ENSMUSG00000053768	ENSMUST00000066379	full-splice_match	1550	1357
Mouse	ENSMUSG00000020153	ENSMUST00000157063	full-splice_match	722	1357
Mouse	ENSMUSG00000043284	ENSMUST00000062677	full-splice_match	1457	1357
Mouse	ENSMUSG00000031227	ENSMUST00000033578	full-splice_match	3550	1352
Mouse	ENSMUSG00000027184	ENSMUST00000143349	full-splice_match	1923	1347
Mouse	ENSMUSG00000028878	ENSMUST00000030696	full-splice_match	3053	1347
Mouse	ENSMUSG00000015291	ENSMUST00000149391	full-splice_match	2746	1347
Mouse	ENSMUSG00000020149	ENSMUST00000109602	full-splice_match	2626	1346
Mouse	ENSMUSG00000043681	ENSMUST00000052126	full-splice_match	408	1345
Mouse	ENSMUSG00000052033	ENSMUST00000063682	full-splice_match	935	1344
Mouse	ENSMUSG00000023004	ENSMUST00000077577	full-splice_match	1743	1344
Mouse	novelGene_ENSMUSG00000062908_AS	transcript16760.3.nnic	antisense	706	1343
Mouse	ENSMUSG00000031673	ENSMUST00000075190	full-splice_match	5647	1342
Mouse	ENSMUSG00000074971	ENSMUST00000099626	full-splice_match	2267	1339
Mouse	ENSMUSG00000015714	ENSMUST00000015858	full-splice_match	2216	1338
Mouse	ENSMUSG00000028478	ENSMUST00000107849	full-splice_match	1099	1338
Mouse	ENSMUSG00000029373	ENSMUST00000031320	full-splice_match	588	1337
Mouse	ENSMUSG00000029422	ENSMUST00000182948	full-splice_match	1609	1337
Mouse	ENSMUSG00000032547	ENSMUST00000035142	full-splice_match	2852	1337
Mouse	ENSMUSG00000040225	ENSMUST00000182393	full-splice_match	6367	1336
Mouse	ENSMUSG00000070802	ENSMUST00000094807	full-splice_match	4147	1335
Mouse	ENSMUSG00000025237	ENSMUST00000026267	full-splice_match	2709	1335
Mouse	ENSMUSG00000015755	ENSMUST00000146444	full-splice_match	4380	1334
Mouse	ENSMUSG00000026966	ENSMUST00000133697	full-splice_match	845	1333
Mouse	ENSMUSG00000022789	ENSMUST00000023477	full-splice_match	3951	1333
Mouse	ENSMUSG00000055447	ENSMUST00000084838	full-splice_match	5250	1333
Mouse	ENSMUSG00000005846	transcript1285.16.nnic	novel_not_in_catalog	974	1333
Mouse	ENSMUSG00000032288	ENSMUST00000034827	full-splice_match	924	1332
Mouse	ENSMUSG00000044408	transcript3397.12.nnic	novel_not_in_catalog	749	1332
Mouse	ENSMUSG00000069237	ENSMUST00000099547	full-splice_match	3664	1332
Mouse	ENSMUSG00000023067	ENSMUST00000023829	full-splice_match	1913	1332
Mouse	ENSMUSG00000048376	ENSMUST00000059193	full-splice_match	3336	1331
Mouse	ENSMUSG00000022378	ENSMUST00000164532	full-splice_match	1770	1331
Mouse	ENSMUSG00000099764	ENSMUST00000127484	full-splice_match	496	1329
Mouse	novelGene_131	transcript4240.2.nnic	intergenic	1324	1328
Mouse	ENSMUSG00000028822	transcript15611.4.nnic	novel_not_in_catalog	1276	1328
Mouse	ENSMUSG00000014504	ENSMUST00000142010	full-splice_match	956	1328
Mouse	ENSMUSG00000020022	ENSMUST00000179990	full-splice_match	566	1327
Mouse	ENSMUSG00000028398	ENSMUST00000030103	full-splice_match	741	1326
Mouse	ENSMUSG00000042363	ENSMUST00000047028	full-splice_match	3362	1326
Mouse	ENSMUSG00000022463	ENSMUST00000023100	full-splice_match	5077	1326
Mouse	ENSMUSG00000001666	ENSMUST00000001716	full-splice_match	649	1325
Mouse	ENSMUSG00000028677	ENSMUST00000102690	full-splice_match	1842	1323
Mouse	ENSMUSG00000022744	ENSMUST00000023426	full-splice_match	2147	1323
Mouse	ENSMUSG00000004032	ENSMUST00000170058	full-splice_match	1083	1321
Mouse	ENSMUSG00000029106	transcript3981.5.nnic	novel_not_in_catalog	501	1321
Mouse	ENSMUSG00000004936	ENSMUST00000005066	full-splice_match	2436	1320
Mouse	ENSMUSG00000022684	ENSMUST00000023365	full-splice_match	3003	1318
Mouse	ENSMUSG00000056050	ENSMUST00000069922	full-splice_match	1904	1316
Mouse	ENSMUSG00000029819	ENSMUST00000031843	full-splice_match	566	1316
Mouse	ENSMUSG00000002379	ENSMUST00000233832	full-splice_match	493	1316
Mouse	ENSMUSG00000035696	ENSMUST00000098098	full-splice_match	5061	1315
Mouse	ENSMUSG00000032239	ENSMUST00000034763	full-splice_match	1134	1315
Mouse	ENSMUSG00000071451	ENSMUST00000124996	full-splice_match	474	1315
Mouse	ENSMUSG00000024959	ENSMUST00000113423	full-splice_match	990	1315
Mouse	ENSMUSG00000025862	ENSMUST00000115073	full-splice_match	6171	1315
Mouse	ENSMUSG00000074088	ENSMUST00000105994	full-splice_match	1584	1314
Mouse	ENSMUSG00000021598	ENSMUST00000022089	full-splice_match	913	1314
Mouse	ENSMUSG00000031740	ENSMUST00000211567	full-splice_match	674	1313
Mouse	ENSMUSG00000091896	ENSMUST00000170693	full-splice_match	2483	1313
Mouse	ENSMUSG00000006699	ENSMUST00000030417	full-splice_match	1448	1312
Mouse	ENSMUSG00000075334	ENSMUST00000100089	full-splice_match	1460	1311
Mouse	ENSMUSG00000018666	transcript19481.11.nnic	novel_not_in_catalog	1039	1311
Mouse	ENSMUSG00000049804	ENSMUST00000124226	full-splice_match	7996	1310
Mouse	ENSMUSG00000021326	transcript1086.13.nic	incomplete-splice_match	1427	1309
Mouse	ENSMUSG00000021643	ENSMUST00000151821	full-splice_match	570	1308
Mouse	ENSMUSG00000018593	ENSMUST00000213866	full-splice_match	1366	1306
Mouse	ENSMUSG00000025860	ENSMUST00000115095	full-splice_match	6670	1306
Mouse	ENSMUSG00000042396	ENSMUST00000170000	full-splice_match	1773	1305
Mouse	ENSMUSG00000025173	ENSMUST00000026173	full-splice_match	2321	1304
Mouse	ENSMUSG00000039128	ENSMUST00000130142	full-splice_match	592	1303
Mouse	ENSMUSG00000035247	ENSMUST00000042052	full-splice_match	8988	1303
Mouse	ENSMUSG00000039218	ENSMUST00000088621	full-splice_match	8564	1303
Mouse	ENSMUSG00000032333	ENSMUST00000034883	full-splice_match	1984	1300
Mouse	ENSMUSG00000020219	ENSMUST00000219896	full-splice_match	542	1300
Mouse	ENSMUSG00000026234	ENSMUST00000185676	full-splice_match	3072	1299
Mouse	novelGene_ENSMUSG00000004366_AS	transcript4161.16.nnic	antisense	934	1299
Mouse	ENSMUSG00000050552	ENSMUST00000062067	full-splice_match	877	1297
Mouse	ENSMUSG00000036667	ENSMUST00000045054	full-splice_match	5257	1297
Mouse	ENSMUSG00000031592	ENSMUST00000045218	full-splice_match	6624	1296
Mouse	ENSMUSG00000032531	transcript15118.9.nic	incomplete-splice_match	2743	1296
Mouse	ENSMUSG00000077450	transcript8036.17.nnic	novel_not_in_catalog	843	1296
Mouse	ENSMUSG00000052298	ENSMUST00000064104	full-splice_match	3069	1294
Mouse	ENSMUSG00000061306	ENSMUST00000179094	full-splice_match	4052	1294
Mouse	ENSMUSG00000019738	ENSMUST00000019882	full-splice_match	819	1293
Mouse	ENSMUSG00000027472	ENSMUST00000150545	full-splice_match	1299	1292
Mouse	ENSMUSG00000015568	ENSMUST00000015712	full-splice_match	4115	1292
Mouse	ENSMUSG00000053453	ENSMUST00000065865	full-splice_match	937	1291
Mouse	ENSMUSG00000027360	ENSMUST00000028838	full-splice_match	2392	1290
Mouse	ENSMUSG00000030339	ENSMUST00000032489	full-splice_match	2107	1290
Mouse	ENSMUSG00000011096	ENSMUST00000054343	full-splice_match	1592	1289
Mouse	ENSMUSG00000052981	ENSMUST00000065118	full-splice_match	2674	1289
Mouse	ENSMUSG00000020708	ENSMUST00000021049	full-splice_match	1316	1288
Mouse	ENSMUSG00000056749	ENSMUST00000071065	full-splice_match	2026	1288
Mouse	ENSMUSG00000029146	ENSMUST00000200730	full-splice_match	2019	1286
Mouse	ENSMUSG00000031508	transcript875.8.nic	incomplete-splice_match	2266	1286
Mouse	ENSMUSG00000004667	ENSMUST00000004786	full-splice_match	1148	1284
Mouse	ENSMUSG00000009863	transcript17474.4.nnic	novel_in_catalog	489	1283
Mouse	ENSMUSG00000030738	ENSMUST00000032992	full-splice_match	3383	1283
Mouse	ENSMUSG00000072964	ENSMUST00000180025	full-splice_match	2812	1283
Mouse	ENSMUSG00000002732	transcript9927.2.nnic	novel_not_in_catalog	938	1282
Mouse	ENSMUSG00000028161	ENSMUST00000070198	full-splice_match	4758	1282
Mouse	ENSMUSG00000037788	ENSMUST00000114297	full-splice_match	2919	1282
Mouse	ENSMUSG00000031990	ENSMUST00000034472	full-splice_match	1942	1281
Mouse	ENSMUSG00000019966	ENSMUST00000105283	full-splice_match	5648	1281
Mouse	ENSMUSG00000006057	ENSMUST00000107684	full-splice_match	596	1281
Mouse	ENSMUSG00000026626	ENSMUST00000067976	full-splice_match	3088	1279
Mouse	ENSMUSG00000055850	ENSMUST00000069580	full-splice_match	1434	1278
Mouse	ENSMUSG00000022098	ENSMUST00000227944	full-splice_match	5365	1277
Mouse	ENSMUSG00000018765	ENSMUST00000018909	full-splice_match	2951	1276
Mouse	ENSMUSG00000049299	ENSMUST00000102601	full-splice_match	759	1276
Mouse	ENSMUSG00000046743	ENSMUST00000061260	full-splice_match	16109	1275
Mouse	ENSMUSG00000022324	transcript1631.15.nnic	novel_not_in_catalog	1149	1275
Mouse	ENSMUSG00000001380	ENSMUST00000001416	full-splice_match	1987	1275
Mouse	ENSMUSG00000020328	ENSMUST00000020578	full-splice_match	1577	1274
Mouse	ENSMUSG00000009894	transcript8653.11.nnic	novel_in_catalog	776	1274
Mouse	ENSMUSG00000038375	ENSMUST00000043237	full-splice_match	3979	1271
Mouse	ENSMUSG00000028843	ENSMUST00000105879	full-splice_match	518	1271
Mouse	ENSMUSG00000029161	ENSMUST00000031051	full-splice_match	1442	1271
Mouse	ENSMUSG00000032320	ENSMUST00000114276	full-splice_match	2024	1271
Mouse	ENSMUSG00000003346	transcript8796.10.nnic	novel_not_in_catalog	1199	1270
Mouse	ENSMUSG00000044927	ENSMUST00000056403	full-splice_match	1217	1269
Mouse	ENSMUSG00000024817	ENSMUST00000123773	full-splice_match	1392	1269
Mouse	ENSMUSG00000059277	transcript31760.7.nnic	novel_not_in_catalog	421	1268
Mouse	ENSMUSG00000007039	ENSMUST00000174493	full-splice_match	1254	1268
Mouse	ENSMUSG00000026365	transcript13594.1.nic	incomplete-splice_match	1586	1267
Mouse	ENSMUSG00000040794	ENSMUST00000111466	full-splice_match	1290	1267
Mouse	ENSMUSG00000024044	ENSMUST00000112680	full-splice_match	4073	1267
Mouse	ENSMUSG00000032526	ENSMUST00000035113	full-splice_match	577	1265
Mouse	ENSMUSG00000060143	ENSMUST00000073238	full-splice_match	384	1265
Mouse	ENSMUSG00000025630	ENSMUST00000026723	full-splice_match	1289	1265
Mouse	ENSMUSG00000017781	transcript14333.11.nic	novel_in_catalog	1257	1264
Mouse	ENSMUSG00000042198	ENSMUST00000041122	full-splice_match	672	1263
Mouse	ENSMUSG00000011884	ENSMUST00000012028	full-splice_match	1762	1263
Mouse	ENSMUSG00000062963	ENSMUST00000080001	full-splice_match	1007	1262
Mouse	ENSMUSG00000029833	transcript2968.6.nnic	novel_not_in_catalog	2421	1262
Mouse	ENSMUSG00000022037	ENSMUST00000022616	full-splice_match	1810	1262
Mouse	ENSMUSG00000040234	ENSMUST00000037709	full-splice_match	3241	1260
Mouse	ENSMUSG00000038848	ENSMUST00000037299	full-splice_match	3184	1259
Mouse	ENSMUSG00000002014	ENSMUST00000166518	full-splice_match	800	1259
Mouse	ENSMUSG00000040842	ENSMUST00000102487	full-splice_match	3244	1257
Mouse	ENSMUSG00000062248	ENSMUST00000075853	full-splice_match	692	1257
Mouse	ENSMUSG00000032009	ENSMUST00000208222	full-splice_match	9125	1255
Mouse	ENSMUSG00000022698	ENSMUST00000159514	full-splice_match	3756	1255
Mouse	ENSMUSG00000026970	ENSMUST00000028347	full-splice_match	4436	1254
Mouse	ENSMUSG00000026883	ENSMUST00000112986	full-splice_match	5580	1254
Mouse	ENSMUSG00000027952	ENSMUST00000029564	full-splice_match	1194	1254
Mouse	ENSMUSG00000028165	ENSMUST00000029815	full-splice_match	3361	1254
Mouse	ENSMUSG00000020346	ENSMUST00000081794	full-splice_match	2976	1254
Mouse	ENSMUSG00000022390	transcript8602.15.nnic	novel_not_in_catalog	821	1253
Mouse	ENSMUSG00000059208	ENSMUST00000148178	full-splice_match	3934	1253
Mouse	ENSMUSG00000053332	ENSMUST00000159663	full-splice_match	346	1252
Mouse	ENSMUSG00000021701	ENSMUST00000022212	full-splice_match	2800	1252
Mouse	ENSMUSG00000037013	ENSMUST00000092041	full-splice_match	2911	1252
Mouse	ENSMUSG00000028693	ENSMUST00000030457	full-splice_match	2118	1250
Mouse	ENSMUSG00000028820	ENSMUST00000030623	full-splice_match	3465	1250
Mouse	ENSMUSG00000000568	ENSMUST00000072750	full-splice_match	1537	1250
Mouse	ENSMUSG00000024909	ENSMUST00000070118	full-splice_match	1781	1249
Mouse	ENSMUSG00000039108	ENSMUST00000055485	full-splice_match	2534	1248
Mouse	ENSMUSG00000023484	transcript12140.15.nnic	novel_not_in_catalog	1390	1248
Mouse	ENSMUSG00000030327	ENSMUST00000032477	full-splice_match	2476	1247
Mouse	ENSMUSG00000024646	ENSMUST00000159837	full-splice_match	623	1247
Mouse	ENSMUSG00000047084	ENSMUST00000138005	full-splice_match	1709	1246
Mouse	ENSMUSG00000031532	ENSMUST00000033933	full-splice_match	1860	1246
Mouse	ENSMUSG00000006095	ENSMUST00000141608	full-splice_match	502	1244
Mouse	ENSMUSG00000039234	ENSMUST00000196482	full-splice_match	923	1242
Mouse	ENSMUSG00000054452	ENSMUST00000002518	full-splice_match	1411	1241
Mouse	ENSMUSG00000005610	ENSMUST00000162415	full-splice_match	7995	1239
Mouse	ENSMUSG00000018287_ENSMUSG00000040712	transcript13132.11.nnic	fusion	1736	1239
Mouse	ENSMUSG00000026020	transcript4698.1.nnic	novel_not_in_catalog	2128	1238
Mouse	ENSMUSG00000048830	ENSMUST00000054223	full-splice_match	1028	1237
Mouse	ENSMUSG00000022677	ENSMUST00000120707	full-splice_match	1414	1237
Mouse	ENSMUSG00000004897	ENSMUST00000005017	full-splice_match	2245	1236
Mouse	ENSMUSG00000002455	ENSMUST00000002529	full-splice_match	3054	1235
Mouse	ENSMUSG00000025854	ENSMUST00000026972	full-splice_match	3582	1235
Mouse	ENSMUSG00000028070	ENSMUST00000029708	full-splice_match	908	1232
Mouse	ENSMUSG00000074199	ENSMUST00000098559	full-splice_match	470	1232
Mouse	ENSMUSG00000003033	ENSMUST00000003117	full-splice_match	2084	1231
Mouse	ENSMUSG00000052854	transcript8588.X.nnic	novel_not_in_catalog	1150	1231
Mouse	ENSMUSG00000019997	ENSMUST00000020171	full-splice_match	2398	1230
Mouse	ENSMUSG00000022519	ENSMUST00000090500	full-splice_match	3698	1230
Mouse	ENSMUSG00000030872	ENSMUST00000144779	full-splice_match	2351	1229
Mouse	ENSMUSG00000098178	ENSMUST00000182010	full-splice_match	1831	1229
Mouse	ENSMUSG00000068798	ENSMUST00000199969	full-splice_match	1377	1227
Mouse	ENSMUSG00000073155	ENSMUST00000130875	full-splice_match	690	1227
Mouse	ENSMUSG00000030905	ENSMUST00000033198	full-splice_match	1383	1227
Mouse	ENSMUSG00000032060	ENSMUST00000216393	full-splice_match	585	1227
Mouse	ENSMUSG00000037916	ENSMUST00000042497	full-splice_match	1661	1227
Mouse	ENSMUSG00000028407	ENSMUST00000129758	full-splice_match	1044	1225
Mouse	ENSMUSG00000015341	ENSMUST00000051094	full-splice_match	1792	1225
Mouse	ENSMUSG00000116165	ENSMUST00000089378	full-splice_match	2001	1224
Mouse	ENSMUSG00000024085	ENSMUST00000086723	full-splice_match	6991	1224
Mouse	ENSMUSG00000034290	ENSMUST00000040992	full-splice_match	5386	1223
Mouse	ENSMUSG00000056515	ENSMUST00000070673	full-splice_match	3473	1223
Mouse	ENSMUSG00000009079	ENSMUST00000102930	full-splice_match	2174	1220
Mouse	ENSMUSG00000068739	ENSMUST00000102625	full-splice_match	1866	1219
Mouse	ENSMUSG00000002658	ENSMUST00000002733	full-splice_match	1717	1218
Mouse	ENSMUSG00000028127	ENSMUST00000029770	full-splice_match	3489	1217
Mouse	ENSMUSG00000030530	ENSMUST00000122232	full-splice_match	4286	1217
Mouse	ENSMUSG00000022234	transcript1394.15.nnic	novel_not_in_catalog	919	1217
Mouse	ENSMUSG00000031590	ENSMUST00000033999	full-splice_match	1039	1216
Mouse	ENSMUSG00000018377	ENSMUST00000018521	full-splice_match	4583	1216
Mouse	ENSMUSG00000030421	ENSMUST00000085513	full-splice_match	3441	1215
Mouse	ENSMUSG00000019841	ENSMUST00000139803	full-splice_match	4858	1215
Mouse	ENSMUSG00000010376	transcript6948.14.nnic	novel_not_in_catalog	376	1215
Mouse	ENSMUSG00000023018	ENSMUST00000023759	full-splice_match	3307	1215
Mouse	ENSMUSG00000043091	ENSMUST00000058914	full-splice_match	1982	1214
Mouse	ENSMUSG00000108414	ENSMUST00000206155	full-splice_match	605	1214
Mouse	ENSMUSG00000041879	ENSMUST00000161189	full-splice_match	4189	1213
Mouse	ENSMUSG00000032492	ENSMUST00000198865	full-splice_match	2201	1213
Mouse	ENSMUSG00000024393	ENSMUST00000025253	full-splice_match	6888	1212
Mouse	ENSMUSG00000025439	ENSMUST00000026506	full-splice_match	1504	1211
Mouse	ENSMUSG00000063172	ENSMUST00000137911	full-splice_match	365	1210
Mouse	ENSMUSG00000040843	transcript16188.1.nic	novel_in_catalog	1820	1209
Mouse	ENSMUSG00000028464	ENSMUST00000133355	full-splice_match	337	1209
Mouse	ENSMUSG00000021546	ENSMUST00000176257	full-splice_match	1380	1209
Mouse	ENSMUSG00000022033	ENSMUST00000022612	full-splice_match	1720	1209
Mouse	ENSMUSG00000032527	ENSMUST00000035116	full-splice_match	2320	1208
Mouse	ENSMUSG00000029201	ENSMUST00000031103	full-splice_match	2550	1207
Mouse	ENSMUSG00000046402	transcript14685.9.nnic	novel_not_in_catalog	456	1207
Mouse	ENSMUSG00000015759	ENSMUST00000015903	full-splice_match	1538	1206
Mouse	ENSMUSG00000027276	ENSMUST00000028735	full-splice_match	5612	1205
Mouse	ENSMUSG00000038429	ENSMUST00000047510	full-splice_match	3213	1204
Mouse	ENSMUSG00000050017	ENSMUST00000200298	full-splice_match	2632	1203
Mouse	ENSMUSG00000000171	transcript5861.9.nnic	novel_not_in_catalog	529	1202
Mouse	ENSMUSG00000050071	ENSMUST00000113120	full-splice_match	718	1202
Mouse	ENSMUSG00000047844	ENSMUST00000116527	full-splice_match	837	1201
Mouse	ENSMUSG00000042032	ENSMUST00000101347	full-splice_match	2053	1200
Mouse	ENSMUSG00000030983	ENSMUST00000033282	full-splice_match	1244	1199
Mouse	ENSMUSG00000018379	transcript17649.11.nnic	novel_not_in_catalog	943	1199
Mouse	ENSMUSG00000033793	ENSMUST00000192698	full-splice_match	1811	1198
Mouse	ENSMUSG00000060802	transcript15924.2.nnic	novel_not_in_catalog	897	1198
Mouse	ENSMUSG00000028626	transcript11169.4.nic	incomplete-splice_match	1227	1198
Mouse	ENSMUSG00000030341	ENSMUST00000032491	full-splice_match	2156	1198
Mouse	ENSMUSG00000027162	ENSMUST00000028583	full-splice_match	4228	1197
Mouse	ENSMUSG00000057657	ENSMUST00000080443	full-splice_match	456	1197
Mouse	ENSMUSG00000027104	ENSMUST00000112016	full-splice_match	3943	1196
Mouse	ENSMUSG00000003345	transcript8969.10.nnic	novel_not_in_catalog	683	1196
Mouse	ENSMUSG00000045136	ENSMUST00000075774	full-splice_match	2182	1196
Mouse	ENSMUSG00000013593	ENSMUST00000111318	full-splice_match	1545	1194
Mouse	ENSMUSG00000010663	ENSMUST00000010807	full-splice_match	3456	1194
Mouse	ENSMUSG00000037487	ENSMUST00000228029	full-splice_match	2279	1193
Mouse	ENSMUSG00000030086	ENSMUST00000032172	full-splice_match	1121	1192
Mouse	ENSMUSG00000005609	ENSMUST00000005749	full-splice_match	4300	1192
Mouse	ENSMUSG00000049421	ENSMUST00000108200	full-splice_match	3604	1192
Mouse	ENSMUSG00000098332	ENSMUST00000184126	full-splice_match	496	1192
Mouse	ENSMUSG00000069744	ENSMUST00000103147	full-splice_match	766	1192
Mouse	ENSMUSG00000019132	ENSMUST00000019276	full-splice_match	5849	1192
Mouse	ENSMUSG00000033423	ENSMUST00000134379	full-splice_match	1013	1191
Mouse	ENSMUSG00000001755	ENSMUST00000107308	full-splice_match	2386	1191
Mouse	ENSMUSG00000026112	transcript2028.1.nnic	novel_not_in_catalog	921	1190
Mouse	ENSMUSG00000028293	ENSMUST00000029970	full-splice_match	2039	1190
Mouse	ENSMUSG00000030591	ENSMUST00000059642	full-splice_match	1540	1190
Mouse	ENSMUSG00000024357	transcript2399.18.nnic	novel_not_in_catalog	1276	1190
Mouse	ENSMUSG00000046330	ENSMUST00000059980	full-splice_match	558	1189
Mouse	ENSMUSG00000045414	ENSMUST00000113028	full-splice_match	3950	1188
Mouse	ENSMUSG00000046062	ENSMUST00000122956	full-splice_match	3688	1186
Mouse	ENSMUSG00000019055	transcript18539.4.nic	novel_in_catalog	1225	1186
Mouse	ENSMUSG00000078429	ENSMUST00000105256	full-splice_match	4817	1186
Mouse	ENSMUSG00000002379	ENSMUST00000233457	full-splice_match	376	1186
Mouse	ENSMUSG00000003131	transcript5176.9.nnic	novel_not_in_catalog	946	1185
Mouse	ENSMUSG00000041736	ENSMUST00000047419	full-splice_match	837	1185
Mouse	ENSMUSG00000024261	ENSMUST00000025110	full-splice_match	3892	1185
Mouse	ENSMUSG00000036707	ENSMUST00000113360	full-splice_match	3805	1184
Mouse	ENSMUSG00000041642	ENSMUST00000130864	full-splice_match	9254	1184
Mouse	ENSMUSG00000027193	ENSMUST00000028617	full-splice_match	3736	1184
Mouse	ENSMUSG00000057614	ENSMUST00000074694	full-splice_match	3135	1184
Mouse	ENSMUSG00000031703	ENSMUST00000034140	full-splice_match	3306	1184
Mouse	ENSMUSG00000060377	ENSMUST00000081987	full-splice_match	449	1184
Mouse	ENSMUSG00000028271	ENSMUST00000029938	full-splice_match	1455	1183
Mouse	ENSMUSG00000032480	ENSMUST00000199332	full-splice_match	368	1183
Mouse	ENSMUSG00000034574	ENSMUST00000223272	full-splice_match	5835	1183
Mouse	ENSMUSG00000072772	ENSMUST00000137318	full-splice_match	424	1182
Mouse	ENSMUSG00000032216	transcript11685.9.nnic	novel_not_in_catalog	1517	1182
Mouse	ENSMUSG00000051518	ENSMUST00000052499	full-splice_match	838	1182
Mouse	ENSMUSG00000015806	ENSMUST00000198258	full-splice_match	1172	1181
Mouse	ENSMUSG00000072704	ENSMUST00000100864	full-splice_match	2842	1180
Mouse	ENSMUSG00000006398	ENSMUST00000006565	full-splice_match	1793	1179
Mouse	ENSMUSG00000003955	ENSMUST00000232390	full-splice_match	463	1179
Mouse	ENSMUSG00000029705	ENSMUST00000176745	full-splice_match	2831	1178
Mouse	ENSMUSG00000026197	ENSMUST00000027394	full-splice_match	1316	1177
Mouse	ENSMUSG00000074754	ENSMUST00000136628	full-splice_match	471	1177
Mouse	ENSMUSG00000037894	transcript15135.3.nnic	novel_not_in_catalog	1261	1177
Mouse	ENSMUSG00000005514	ENSMUST00000005651	full-splice_match	2636	1177
Mouse	ENSMUSG00000028771	ENSMUST00000030556	full-splice_match	3280	1177
Mouse	ENSMUSG00000041815	ENSMUST00000100375	full-splice_match	3157	1177
Mouse	ENSMUSG00000063787	ENSMUST00000224633	full-splice_match	557	1175
Mouse	ENSMUSG00000038065	ENSMUST00000190641	full-splice_match	5303	1174
Mouse	ENSMUSG00000005354	ENSMUST00000005487	full-splice_match	1298	1173
Mouse	ENSMUSG00000023010	transcript12412.15.nnic	novel_not_in_catalog	547	1173
Mouse	ENSMUSG00000032042	ENSMUST00000034541	full-splice_match	2993	1172
Mouse	ENSMUSG00000033419	ENSMUST00000074468	full-splice_match	4336	1172
Mouse	ENSMUSG00000034714	ENSMUST00000045779	full-splice_match	3486	1172
Mouse	ENSMUSG00000025575	ENSMUST00000106288	full-splice_match	2873	1172
Mouse	ENSMUSG00000024500	ENSMUST00000117687	full-splice_match	2271	1172
Mouse	ENSMUSG00000022658	ENSMUST00000096057	full-splice_match	1240	1171
Mouse	ENSMUSG00000024975	ENSMUST00000025931	full-splice_match	2330	1171
Mouse	ENSMUSG00000026657	transcript177.2.nnic	novel_not_in_catalog	2097	1170
Mouse	ENSMUSG00000002010	ENSMUST00000156299	full-splice_match	2080	1170
Mouse	ENSMUSG00000061559	ENSMUST00000130368	full-splice_match	1162	1169
Mouse	ENSMUSG00000001576	ENSMUST00000167662	full-splice_match	2754	1169
Mouse	ENSMUSG00000014601	ENSMUST00000200049	full-splice_match	1550	1168
Mouse	ENSMUSG00000044792	ENSMUST00000057115	full-splice_match	1942	1167
Mouse	ENSMUSG00000027810	ENSMUST00000154219	full-splice_match	1945	1166
Mouse	ENSMUSG00000040128	ENSMUST00000049357	full-splice_match	1648	1165
Mouse	ENSMUSG00000031807	transcript7755.8.nnic	novel_not_in_catalog	471	1165
Mouse	ENSMUSG00000000078	ENSMUST00000000080	full-splice_match	4225	1165
Mouse	ENSMUSG00000061527	ENSMUST00000023709	full-splice_match	2197	1165
Mouse	ENSMUSG00000098178	transcript11532.17.nnic	genic	1008	1165
Mouse	ENSMUSG00000062963	transcript17170.1.nic	incomplete-splice_match	1085	1164
Mouse	ENSMUSG00000066149	ENSMUST00000084525	full-splice_match	819	1164
Mouse	novelGene_ENSMUSG00000010936_AS	transcript14548.8.nnic	antisense	758	1164
Mouse	ENSMUSG00000026817	ENSMUST00000113277	full-splice_match	2063	1163
Mouse	ENSMUSG00000021114	ENSMUST00000219316	full-splice_match	775	1163
Mouse	ENSMUSG00000022884	ENSMUST00000131871	full-splice_match	1737	1162
Mouse	novelGene_ENSMUSG00000052534_AS	transcript16594.1.nnic	antisense	1524	1161
Mouse	ENSMUSG00000002997	ENSMUST00000036497	full-splice_match	3378	1161
Mouse	ENSMUSG00000035171	transcript6701.19.nnic	novel_not_in_catalog	1347	1161
Mouse	ENSMUSG00000033047	ENSMUST00000230032	full-splice_match	2345	1160
Mouse	ENSMUSG00000031711	ENSMUST00000034147	full-splice_match	1675	1159
Mouse	ENSMUSG00000009555	ENSMUST00000009699	full-splice_match	1733	1158
Mouse	ENSMUSG00000037211	transcript2564.3.nnic	novel_in_catalog	2211	1158
Mouse	ENSMUSG00000019433	transcript9558.8.nnic	novel_not_in_catalog	1339	1158
Mouse	ENSMUSG00000032381	transcript10324.9.nnic	novel_in_catalog	1227	1158
Mouse	ENSMUSG00000002372	ENSMUST00000233319	full-splice_match	2567	1158
Mouse	ENSMUSG00000060475	transcript1366.17.nic	incomplete-splice_match	1829	1158
Mouse	ENSMUSG00000020570	ENSMUST00000020885	full-splice_match	2019	1157
Mouse	ENSMUSG00000021417	ENSMUST00000171229	full-splice_match	1426	1156
Mouse	ENSMUSG00000028180	transcript16915.3.nnic	novel_not_in_catalog	1023	1155
Mouse	ENSMUSG00000029250	ENSMUST00000031167	full-splice_match	4145	1155
Mouse	ENSMUSG00000028405	ENSMUST00000102973	full-splice_match	3832	1154
Mouse	ENSMUSG00000026977	ENSMUST00000102748	full-splice_match	3594	1153
Mouse	ENSMUSG00000016386	ENSMUST00000111063	full-splice_match	2848	1153
Mouse	ENSMUSG00000027868	ENSMUST00000029462	full-splice_match	3566	1153
Mouse	ENSMUSG00000022440	ENSMUST00000023075	full-splice_match	2402	1152
Mouse	ENSMUSG00000029472	transcript13436.5.nnic	novel_not_in_catalog	966	1151
Mouse	ENSMUSG00000038482	ENSMUST00000209396	full-splice_match	2421	1151
Mouse	ENSMUSG00000040822	ENSMUST00000038539	full-splice_match	1843	1151
Mouse	ENSMUSG00000074797	ENSMUST00000103193	full-splice_match	1390	1150
Mouse	novelGene_ENSMUSG00000025607_AS	transcript2185.6.nnic	antisense	1044	1150
Mouse	ENSMUSG00000005813	ENSMUST00000029804	full-splice_match	2686	1149
Mouse	ENSMUSG00000029617	ENSMUST00000031621	full-splice_match	1769	1149
Mouse	ENSMUSG00000023043	ENSMUST00000023803	full-splice_match	1437	1149
Mouse	ENSMUSG00000024097	ENSMUST00000234696	full-splice_match	987	1149
Mouse	ENSMUSG00000035851	ENSMUST00000123625	full-splice_match	1246	1148
Mouse	ENSMUSG00000029712	ENSMUST00000139395	full-splice_match	1592	1148
Mouse	ENSMUSG00000053565	ENSMUST00000207683	full-splice_match	647	1148
Mouse	ENSMUSG00000041852	ENSMUST00000048966	full-splice_match	7417	1148
Mouse	ENSMUSG00000029810	ENSMUST00000164733	full-splice_match	1648	1146
Mouse	ENSMUSG00000037072	ENSMUST00000106211	full-splice_match	1178	1145
Mouse	ENSMUSG00000017716	transcript27786.11.nnic	novel_in_catalog	869	1145
Mouse	ENSMUSG00000022122	ENSMUST00000022718	full-splice_match	4107	1145
Mouse	ENSMUSG00000022698	transcript6674.16.nnic	novel_not_in_catalog	924	1145
Mouse	ENSMUSG00000050989	ENSMUST00000060435	full-splice_match	3445	1144
Mouse	ENSMUSG00000043419	ENSMUST00000129321	full-splice_match	2081	1144
Mouse	ENSMUSG00000003031	ENSMUST00000003115	full-splice_match	2393	1143
Mouse	ENSMUSG00000037984	ENSMUST00000044767	full-splice_match	2150	1143
Mouse	ENSMUSG00000030772	ENSMUST00000033036	full-splice_match	3359	1143
Mouse	ENSMUSG00000093904	ENSMUST00000179857	full-splice_match	4902	1143
Mouse	ENSMUSG00000020108	ENSMUST00000020308	full-splice_match	1755	1143
Mouse	ENSMUSG00000038459	ENSMUST00000117085	full-splice_match	2238	1142
Mouse	ENSMUSG00000020448	ENSMUST00000077078	full-splice_match	2787	1142
Mouse	ENSMUSG00000060743	ENSMUST00000081026	full-splice_match	888	1141
Mouse	ENSMUSG00000031176	ENSMUST00000033519	full-splice_match	2176	1141
Mouse	ENSMUSG00000034248	ENSMUST00000184497	full-splice_match	5927	1140
Mouse	ENSMUSG00000033825	ENSMUST00000069616	full-splice_match	1081	1140
Mouse	ENSMUSG00000026918	ENSMUST00000028282	full-splice_match	5419	1139
Mouse	ENSMUSG00000017386	ENSMUST00000017530	full-splice_match	2078	1139
Mouse	ENSMUSG00000028062	ENSMUST00000029698	full-splice_match	668	1138
Mouse	ENSMUSG00000031232	ENSMUST00000151689	full-splice_match	4531	1137
Mouse	ENSMUSG00000001794	transcript8333.7.nnic	novel_in_catalog	786	1136
Mouse	ENSMUSG00000021806	ENSMUST00000022340	full-splice_match	4876	1136
Mouse	ENSMUSG00000029463	ENSMUST00000031419	full-splice_match	1388	1135
Mouse	ENSMUSG00000055839	ENSMUST00000232702	full-splice_match	581	1135
Mouse	ENSMUSG00000025358	ENSMUST00000026415	full-splice_match	2240	1134
Mouse	ENSMUSG00000030750	ENSMUST00000033006	full-splice_match	1120	1133
Mouse	ENSMUSG00000020900	ENSMUST00000139059	full-splice_match	1811	1132
Mouse	ENSMUSG00000001240	ENSMUST00000149585	full-splice_match	957	1132
Mouse	ENSMUSG00000063904	ENSMUST00000025851	full-splice_match	2683	1132
Mouse	ENSMUSG00000021700	ENSMUST00000167824	full-splice_match	8444	1131
Mouse	ENSMUSG00000031748	ENSMUST00000034198	full-splice_match	2948	1130
Mouse	ENSMUSG00000025395	ENSMUST00000026461	full-splice_match	1583	1130
Mouse	ENSMUSG00000002365	ENSMUST00000002436	full-splice_match	3331	1130
Mouse	ENSMUSG00000020841	ENSMUST00000021201	full-splice_match	7946	1129
Mouse	ENSMUSG00000018446	ENSMUST00000078528	full-splice_match	1175	1129
Mouse	ENSMUSG00000012017	ENSMUST00000231383	full-splice_match	2641	1126
Mouse	ENSMUSG00000074247	ENSMUST00000135052	full-splice_match	1929	1125
Mouse	novelGene_ENSMUSG00000116039_AS	transcript12426.15.nnic	antisense	955	1125
Mouse	ENSMUSG00000028614	ENSMUST00000139560	full-splice_match	4584	1124
Mouse	ENSMUSG00000018415	ENSMUST00000070681	full-splice_match	4283	1124
Mouse	ENSMUSG00000021876	ENSMUST00000169895	full-splice_match	1460	1124
Mouse	novelGene_ENSMUSG00000101188_AS	transcript5173.1.nnic	antisense	1462	1123
Mouse	ENSMUSG00000032382	ENSMUST00000034946	full-splice_match	2073	1123
Mouse	ENSMUSG00000022750	transcript2383.16.nnic	novel_not_in_catalog	1901	1123
Mouse	ENSMUSG00000023391	ENSMUST00000024159	full-splice_match	2473	1122
Mouse	ENSMUSG00000025139	ENSMUST00000001950	full-splice_match	3788	1122
Mouse	ENSMUSG00000055531	ENSMUST00000069168	full-splice_match	6526	1122
Mouse	ENSMUSG00000026281	ENSMUST00000027503	full-splice_match	1003	1121
Mouse	ENSMUSG00000021832	ENSMUST00000022380	full-splice_match	2234	1121
Mouse	ENSMUSG00000031555	transcript2206.8.nnic	novel_not_in_catalog	1528	1120
Mouse	ENSMUSG00000017774	ENSMUST00000108431	full-splice_match	4718	1120
Mouse	ENSMUSG00000105361_ENSMUSG00000106106	transcript11717.17.nnic	fusion	1258	1120
Mouse	ENSMUSG00000014077	ENSMUST00000014221	full-splice_match	2609	1119
Mouse	ENSMUSG00000031584	ENSMUST00000033992	full-splice_match	2673	1119
Mouse	ENSMUSG00000043391	ENSMUST00000053336	full-splice_match	5164	1119
Mouse	ENSMUSG00000063659	ENSMUST00000094276	full-splice_match	4204	1118
Mouse	ENSMUSG00000078619	ENSMUST00000021052	full-splice_match	2747	1118
Mouse	ENSMUSG00000044629	ENSMUST00000058159	full-splice_match	1654	1118
Mouse	ENSMUSG00000026003	ENSMUST00000027153	full-splice_match	1916	1117
Mouse	ENSMUSG00000026930	ENSMUST00000114134	full-splice_match	2043	1117
Mouse	ENSMUSG00000014956	ENSMUST00000015100	full-splice_match	5962	1115
Mouse	ENSMUSG00000008348	transcript14645.5.nnic	novel_not_in_catalog	1953	1115
Mouse	ENSMUSG00000002984	ENSMUST00000093552	full-splice_match	1577	1115
Mouse	ENSMUSG00000037032	ENSMUST00000188368	full-splice_match	1970	1115
Mouse	ENSMUSG00000033628	ENSMUST00000115812	full-splice_match	3257	1115
Mouse	ENSMUSG00000030401	ENSMUST00000108468	full-splice_match	1076	1114
Mouse	ENSMUSG00000025889	ENSMUST00000163779	full-splice_match	1188	1113
Mouse	ENSMUSG00000001248	ENSMUST00000001280	full-splice_match	2713	1113
Mouse	ENSMUSG00000036169	ENSMUST00000041407	full-splice_match	1781	1113
Mouse	ENSMUSG00000051615	ENSMUST00000062117	full-splice_match	4191	1113
Mouse	ENSMUSG00000026576	ENSMUST00000027863	full-splice_match	2580	1112
Mouse	ENSMUSG00000021520	ENSMUST00000021993	full-splice_match	535	1112
Mouse	ENSMUSG00000023025	ENSMUST00000100206	full-splice_match	6530	1112
Mouse	ENSMUSG00000033460	ENSMUST00000113197	full-splice_match	2179	1112
Mouse	ENSMUSG00000020955	ENSMUST00000021338	full-splice_match	1035	1111
Mouse	ENSMUSG00000010830	ENSMUST00000010974	full-splice_match	1411	1110
Mouse	ENSMUSG00000027763	ENSMUST00000099087	full-splice_match	5655	1109
Mouse	ENSMUSG00000038150	ENSMUST00000052919	full-splice_match	2184	1109
Mouse	ENSMUSG00000029017	ENSMUST00000030882	full-splice_match	1615	1108
Mouse	ENSMUSG00000059263	ENSMUST00000106653	full-splice_match	5540	1108
Mouse	ENSMUSG00000024925	transcript2598.19.nnic	novel_not_in_catalog	874	1108
Mouse	ENSMUSG00000028381	ENSMUST00000030074	full-splice_match	4012	1107
Mouse	ENSMUSG00000032741	ENSMUST00000046426	full-splice_match	4712	1106
Mouse	ENSMUSG00000022661	transcript6934.16.nnic	novel_not_in_catalog	1467	1106
Mouse	ENSMUSG00000040423	ENSMUST00000161609	full-splice_match	11006	1105
Mouse	ENSMUSG00000033379	ENSMUST00000036380	full-splice_match	1000	1105
[truncated: 54,620 more rows]

## Sheet: Supplementary Data 6
Supplementary Data 5. List of Novel Not in Catalog (NNC) Isoforms in Mouse and Grafted Samples, related to Fig. 3.
Species	Gene ID	Isoform ID	Structural Category	Subcategory	Length (bp)	Exon Count	Full-length Read Count
Mouse	ENSMUSG00000072235	transcript12096.15.nnic	novel_not_in_catalog	at_least_one_novel_splicesite	1135	2	63228
Mouse	ENSMUSG00000001506	transcript18596.11.nnic	novel_not_in_catalog	at_least_one_novel_splicesite	724	3	48765
Mouse	ENSMUSG00000052305	transcript21453.7.nnic	novel_not_in_catalog	at_least_one_novel_splicesite	300	2	43678
Mouse	ENSMUSG00000026043	transcript3171.1.nnic	novel_not_in_catalog	at_least_one_novel_splicesite	991	4	41727
Mouse	ENSMUSG00000029661	transcript130.6.nnic	novel_not_in_catalog	at_least_one_novel_splicesite	1514	9	40538
Mouse	ENSMUSG00000018593	transcript7746.11.nnic	novel_not_in_catalog	at_least_one_novel_splicesite	679	2	33388
Mouse	ENSMUSG00000027750	transcript3285.3.nnic	novel_not_in_catalog	at_least_one_novel_splicesite	1444	5	25001
Mouse	ENSMUSG00000029580	transcript19421.5.nnic	novel_not_in_catalog	intron_retention	971	5	24332
Mouse	ENSMUSG00000031972	transcript18110.8.nnic	novel_not_in_catalog	at_least_one_novel_splicesite	471	3	22441
Mouse	ENSMUSG00000030744	transcript19144.7.nnic	novel_not_in_catalog	at_least_one_novel_splicesite	1003	7	14762
Mouse	ENSMUSG00000006728	transcript14427.10.nnic	novel_not_in_catalog	at_least_one_novel_splicesite	523	3	14467
Mouse	ENSMUSG00000027828	transcript4230.3.nnic	novel_not_in_catalog	at_least_one_novel_splicesite	1164	2	13179
Mouse	ENSMUSG00000048583	transcript31516.7.nnic	novel_not_in_catalog	at_least_one_novel_splicesite	497	2	12720
Mouse	ENSMUSG00000004980	transcript5019.6.nnic	novel_not_in_catalog	at_least_one_novel_splicesite	605	2	12621
Mouse	ENSMUSG00000001506	transcript18692.11.nnic	novel_not_in_catalog	at_least_one_novel_splicesite	473	2	11531
Mouse	ENSMUSG00000008348	transcript14884.5.nnic	novel_not_in_catalog	at_least_one_novel_splicesite	989	2	10909
Mouse	ENSMUSG00000001525	transcript10490.17.nnic	novel_not_in_catalog	at_least_one_novel_splicesite	1586	4	9706
Mouse	ENSMUSG00000030672	transcript25773.7.nnic	novel_not_in_catalog	at_least_one_novel_splicesite	911	7	9482
Mouse	ENSMUSG00000020496	transcript8167.11.nnic	novel_not_in_catalog	at_least_one_novel_splicesite	164	2	9204
Mouse	ENSMUSG00000019505	transcript9778.11.nnic	novel_not_in_catalog	at_least_one_novel_splicesite	1044	2	9073
Mouse	ENSMUSG00000045763	transcript1086.15.nnic	novel_not_in_catalog	at_least_one_novel_splicesite	1057	2	8930
Mouse	ENSMUSG00000001175	transcript8893.12.nnic	novel_not_in_catalog	at_least_one_novel_splicesite	1548	5	8372
Mouse	ENSMUSG00000030057	transcript9310.6.nnic	novel_not_in_catalog	at_least_one_novel_splicesite	275	2	8158
Mouse	ENSMUSG00000030057	transcript9308.6.nnic	novel_not_in_catalog	at_least_one_novel_splicesite	357	2	7113
Mouse	ENSMUSG00000029580	transcript19498.5.nnic	novel_not_in_catalog	at_least_one_novel_splicesite	729	4	6911
Mouse	ENSMUSG00000058672	transcript2263.13.nnic	novel_not_in_catalog	at_least_one_novel_splicesite	797	3	6552
Mouse	ENSMUSG00000028416	transcript2203.4.nnic	novel_not_in_catalog	at_least_one_novel_splicesite	1193	7	6187
Mouse	ENSMUSG00000001506	transcript18723.11.nnic	novel_not_in_catalog	at_least_one_novel_splicesite	641	2	6182
Mouse	ENSMUSG00000031633	transcript4280.8.nnic	novel_not_in_catalog	at_least_one_novel_splicesite	882	4	6168
Mouse	ENSMUSG00000070436	transcript19100.7.nnic	novel_not_in_catalog	at_least_one_novel_splicesite	805	2	5996
Mouse	ENSMUSG00000024091	transcript15916.17.nnic	novel_not_in_catalog	at_least_one_novel_splicesite	1447	6	5669
Mouse	ENSMUSG00000037152	transcript2966.3.nnic	novel_not_in_catalog	at_least_one_novel_splicesite	762	5	5504
Mouse	ENSMUSG00000044041	transcript20974.11.nnic	novel_not_in_catalog	at_least_one_novel_splicesite	1212	8	5297
Mouse	ENSMUSG00000015222	transcript5805.1.nnic	novel_not_in_catalog	at_least_one_novel_splicesite	990	2	5272
Mouse	ENSMUSG00000043165	transcript8537.3.nnic	novel_not_in_catalog	at_least_one_novel_splicesite	423	2	5255
Mouse	ENSMUSG00000029126	transcript4509.5.nnic	novel_not_in_catalog	at_least_one_novel_splicesite	895	5	5146
Mouse	ENSMUSG00000090625	transcript25487.2.nnic	novel_not_in_catalog	at_least_one_novel_splicesite	437	2	5008
Mouse	ENSMUSG00000070436	transcript19097.7.nnic	novel_not_in_catalog	at_least_one_novel_splicesite	799	2	4955
Mouse	ENSMUSG00000017493	transcript20786.11.nnic	novel_not_in_catalog	at_least_one_novel_splicesite	598	2	4948
Mouse	ENSMUSG00000030647	transcript18575.7.nnic	novel_not_in_catalog	at_least_one_novel_splicesite	750	3	4896
Mouse	ENSMUSG00000029447	transcript15275.5.nnic	novel_not_in_catalog	at_least_one_novel_splicesite	2547	13	4525
Mouse	ENSMUSG00000038871	transcript2461.6.nnic	novel_not_in_catalog	at_least_one_novel_splicesite	1395	3	4397
Mouse	ENSMUSG00000004044	transcript21948.11.nnic	novel_not_in_catalog	at_least_one_novel_splicesite	1171	2	4281
Mouse	ENSMUSG00000027248	transcript15363.2.nnic	novel_not_in_catalog	at_least_one_novel_splicesite	748	5	4278
Mouse	ENSMUSG00000025967	transcript5361.1.nnic	novel_not_in_catalog	at_least_one_novel_splicesite	982	7	4241
Mouse	ENSMUSG00000020719	transcript24519.11.nnic	novel_not_in_catalog	at_least_one_novel_splicesite	1195	2	4193
Mouse	ENSMUSG00000003970	transcript6230.15.nnic	novel_not_in_catalog	at_least_one_novel_splicesite	692	5	4159
Mouse	ENSMUSG00000029661	transcript303.6.nnic	novel_not_in_catalog	at_least_one_novel_splicesite	747	2	4102
Mouse	ENSMUSG00000022462	transcript11259.15.nnic	novel_not_in_catalog	at_least_one_novel_splicesite	989	2	3894
Mouse	ENSMUSG00000030189	transcript15586.6.nnic	novel_not_in_catalog	at_least_one_novel_splicesite	943	5	3766
Mouse	ENSMUSG00000030208	transcript15932.6.nnic	novel_not_in_catalog	at_least_one_novel_splicesite	1434	2	3749
Mouse	ENSMUSG00000054405	transcript14745.4.nnic	novel_not_in_catalog	at_least_one_novel_splicesite	1164	6	3690
Mouse	ENSMUSG00000029649	transcript20986.5.nnic	novel_not_in_catalog	at_least_one_novel_splicesite	858	6	3587
Mouse	ENSMUSG00000032336	transcript7820.9.nnic	novel_not_in_catalog	intron_retention	1820	8	3418
Mouse	ENSMUSG00000029169	transcript5240.5.nnic	novel_not_in_catalog	at_least_one_novel_splicesite	1068	4	3413
Mouse	ENSMUSG00000020321	transcript2513.11.nnic	novel_not_in_catalog	at_least_one_novel_splicesite	1061	7	3366
Mouse	ENSMUSG00000027805	transcript3784.3.nnic	novel_not_in_catalog	at_least_one_novel_splicesite	1206	2	3341
Mouse	ENSMUSG00000050953	transcript4014.10.nnic	novel_not_in_catalog	at_least_one_novel_splicesite	683	2	3280
Mouse	ENSMUSG00000047261	transcript6553.16.nnic	novel_not_in_catalog	at_least_one_novel_splicesite	766	2	3277
Mouse	ENSMUSG00000024012	transcript6593.17.nnic	novel_not_in_catalog	intron_retention	1353	7	3267
Mouse	ENSMUSG00000003814	transcript10148.8.nnic	novel_not_in_catalog	at_least_one_novel_splicesite	410	2	3255
Mouse	ENSMUSG00000031765	transcript11823.8.nnic	novel_not_in_catalog	at_least_one_novel_splicesite	780	3	3048
Mouse	ENSMUSG00000031422	transcript8450.X.nnic	novel_not_in_catalog	at_least_one_novel_splicesite	903	2	3019
Mouse	ENSMUSG00000020297	transcript3615.11.nnic	novel_not_in_catalog	at_least_one_novel_splicesite	1279	2	3006
Mouse	ENSMUSG00000059734	transcript180.19.nnic	novel_not_in_catalog	at_least_one_novel_splicesite	830	7	2999
Mouse	ENSMUSG00000002900	transcript2156.12.nnic	novel_not_in_catalog	at_least_one_novel_splicesite	926	5	2954
Mouse	ENSMUSG00000053192	transcript9632.3.nnic	novel_not_in_catalog	at_least_one_novel_splicesite	273	2	2951
Mouse	ENSMUSG00000022816	transcript6071.16.nnic	novel_not_in_catalog	at_least_one_novel_splicesite	1017	2	2940
Mouse	ENSMUSG00000038991	transcript3114.13.nnic	novel_not_in_catalog	at_least_one_novel_splicesite	1485	2	2921
Mouse	ENSMUSG00000041959	transcript8919.3.nnic	novel_not_in_catalog	at_least_one_novel_splicesite	882	3	2895
Mouse	ENSMUSG00000020458	transcript3328.11.nnic	novel_not_in_catalog	at_least_one_novel_splicesite	731	4	2823
Mouse	ENSMUSG00000031029	transcript22040.7.nnic	novel_not_in_catalog	at_least_one_novel_splicesite	1038	9	2813
Mouse	ENSMUSG00000079428	transcript8078.X.nnic	novel_not_in_catalog	at_least_one_novel_splicesite	1104	3	2807
Mouse	ENSMUSG00000020674	transcript2048.12.nnic	novel_not_in_catalog	at_least_one_novel_splicesite	1886	2	2771
Mouse	ENSMUSG00000051853	transcript11671.15.nnic	novel_not_in_catalog	at_least_one_novel_splicesite	1423	2	2717
Mouse	ENSMUSG00000019179	transcript16974.5.nnic	novel_not_in_catalog	at_least_one_novel_splicesite	348	2	2687
Mouse	ENSMUSG00000029781	transcript5594.6.nnic	novel_not_in_catalog	at_least_one_novel_splicesite	823	2	2683
Mouse	ENSMUSG00000078429	transcript14288.10.nnic	novel_not_in_catalog	at_least_one_novel_splicesite	774	2	2676
Mouse	ENSMUSG00000012848	transcript2234.7.nnic	novel_not_in_catalog	at_least_one_novel_splicesite	252	3	2661
Mouse	ENSMUSG00000039530	transcript3744.8.nnic	novel_not_in_catalog	at_least_one_novel_splicesite	1553	10	2655
Mouse	ENSMUSG00000019916	transcript4313.10.nnic	novel_not_in_catalog	at_least_one_novel_splicesite	1494	6	2592
Mouse	ENSMUSG00000035783	transcript7831.19.nnic	novel_not_in_catalog	at_least_one_novel_splicesite	1566	9	2554
Mouse	ENSMUSG00000034932	transcript10037.10.nnic	novel_not_in_catalog	at_least_one_novel_splicesite	663	3	2530
Mouse	ENSMUSG00000016541	transcript9953.15.nnic	novel_not_in_catalog	at_least_one_novel_splicesite	786	4	2525
Mouse	ENSMUSG00000027642	transcript21770.2.nnic	novel_not_in_catalog	at_least_one_novel_splicesite	750	5	2514
Mouse	ENSMUSG00000020076	transcript5084.10.nnic	novel_not_in_catalog	at_least_one_novel_splicesite	709	3	2505
Mouse	ENSMUSG00000032575	transcript15931.9.nnic	novel_not_in_catalog	at_least_one_novel_splicesite	838	4	2480
Mouse	ENSMUSG00000029838	transcript2874.6.nnic	novel_not_in_catalog	at_least_one_novel_splicesite	326	2	2467
Mouse	ENSMUSG00000002265	transcript1654.7.nnic	novel_not_in_catalog	at_least_one_novel_splicesite	827	2	2435
Mouse	ENSMUSG00000003721	transcript11358.1.nnic	novel_not_in_catalog	at_least_one_novel_splicesite	1218	7	2324
Mouse	ENSMUSG00000036752	transcript2224.2.nnic	novel_not_in_catalog	at_least_one_novel_splicesite	845	5	2320
Mouse	ENSMUSG00000019370	transcript3477.7.nnic	novel_not_in_catalog	at_least_one_novel_splicesite	1052	6	2307
Mouse	ENSMUSG00000021102	transcript9548.12.nnic	novel_not_in_catalog	at_least_one_novel_splicesite	1009	2	2304
Mouse	ENSMUSG00000037058	transcript2534.18.nnic	novel_not_in_catalog	at_least_one_novel_splicesite	1508	4	2301
Mouse	ENSMUSG00000040385	transcript1029.19.nnic	novel_not_in_catalog	at_least_one_novel_splicesite	459	2	2301
Mouse	ENSMUSG00000025289	transcript9703.X.nnic	novel_not_in_catalog	at_least_one_novel_splicesite	1070	7	2290
Mouse	ENSMUSG00000020483	transcript17619.11.nnic	novel_not_in_catalog	at_least_one_novel_splicesite	855	2	2239
Mouse	ENSMUSG00000022108	transcript9494.14.nnic	novel_not_in_catalog	at_least_one_novel_splicesite	531	4	2230
Mouse	ENSMUSG00000006418	transcript24396.2.nnic	novel_not_in_catalog	at_least_one_novel_splicesite	1115	7	2189
Mouse	ENSMUSG00000024381	transcript1781.18.nnic	novel_not_in_catalog	at_least_one_novel_splicesite	944	4	2173
Mouse	ENSMUSG00000027500	transcript256.3.nnic	novel_not_in_catalog	at_least_one_novel_splicesite	751	5	2161
Mouse	ENSMUSG00000063511	transcript13607.7.nnic	novel_not_in_catalog	at_least_one_novel_splicesite	950	3	2149
Mouse	ENSMUSG00000025132	transcript29257.11.nnic	novel_not_in_catalog	at_least_one_novel_splicesite	372	2	2121
Mouse	ENSMUSG00000042045	transcript6485.9.nnic	novel_not_in_catalog	at_least_one_novel_splicesite	712	2	2083
Mouse	ENSMUSG00000026566	transcript16298.1.nnic	novel_not_in_catalog	at_least_one_novel_splicesite	2078	3	2075
Mouse	ENSMUSG00000040459	transcript528.8.nnic	novel_not_in_catalog	at_least_one_novel_splicesite	1245	4	2067
Mouse	ENSMUSG00000021917	transcript3008.14.nnic	novel_not_in_catalog	at_least_one_novel_splicesite	681	4	2050
Mouse	ENSMUSG00000029580	transcript19584.5.nnic	novel_not_in_catalog	at_least_one_novel_splicesite	514	2	2047
Mouse	ENSMUSG00000022312	transcript2995.15.nnic	novel_not_in_catalog	at_least_one_novel_splicesite	654	4	2030
Mouse	ENSMUSG00000025162	transcript30037.11.nnic	novel_not_in_catalog	at_least_one_novel_splicesite	1082	2	2016
Mouse	ENSMUSG00000015837	transcript5920.11.nnic	novel_not_in_catalog	at_least_one_novel_splicesite	1954	8	2015
Mouse	ENSMUSG00000058013	transcript8126.5.nnic	novel_not_in_catalog	at_least_one_novel_splicesite	1662	2	2013
Mouse	ENSMUSG00000060904	transcript11601.10.nnic	novel_not_in_catalog	at_least_one_novel_splicesite	1309	3	1976
Mouse	ENSMUSG00000025651	transcript17203.9.nnic	novel_not_in_catalog	at_least_one_novel_splicesite	365	3	1974
Mouse	ENSMUSG00000022982	transcript8869.16.nnic	novel_not_in_catalog	at_least_one_novel_splicesite	725	3	1972
Mouse	ENSMUSG00000034024	transcript13637.10.nnic	novel_not_in_catalog	at_least_one_novel_splicesite	551	3	1961
Mouse	ENSMUSG00000027500	transcript268.3.nnic	novel_not_in_catalog	at_least_one_novel_splicesite	758	4	1946
Mouse	ENSMUSG00000058569	transcript5773.13.nnic	novel_not_in_catalog	at_least_one_novel_splicesite	795	4	1939
Mouse	ENSMUSG00000025132	transcript29200.11.nnic	novel_not_in_catalog	at_least_one_novel_splicesite	1046	3	1938
Mouse	ENSMUSG00000005054	transcript7147.10.nnic	novel_not_in_catalog	at_least_one_novel_splicesite	711	3	1927
Mouse	ENSMUSG00000009079	transcript826.11.nnic	novel_not_in_catalog	at_least_one_novel_splicesite	1520	8	1925
Mouse	ENSMUSG00000034300	transcript2250.18.nnic	novel_not_in_catalog	at_least_one_novel_splicesite	1487	2	1884
Mouse	ENSMUSG00000041203	transcript10661.8.nnic	novel_not_in_catalog	at_least_one_novel_splicesite	1012	3	1839
Mouse	ENSMUSG00000018171	transcript17181.11.nnic	novel_not_in_catalog	at_least_one_novel_splicesite	1070	3	1838
Mouse	ENSMUSG00000027712	transcript2407.3.nnic	novel_not_in_catalog	at_least_one_novel_splicesite	243	2	1780
Mouse	ENSMUSG00000061353	transcript12200.6.nnic	novel_not_in_catalog	at_least_one_novel_splicesite	972	2	1773
Mouse	ENSMUSG00000027559	transcript869.3.nnic	novel_not_in_catalog	at_least_one_novel_splicesite	1220	8	1761
Mouse	ENSMUSG00000033161	transcript11040.3.nnic	novel_not_in_catalog	at_least_one_novel_splicesite	777	3	1757
Mouse	ENSMUSG00000020297	transcript3623.11.nnic	novel_not_in_catalog	at_least_one_novel_splicesite	234	2	1755
Mouse	ENSMUSG00000032199	transcript11433.9.nnic	novel_not_in_catalog	at_least_one_novel_splicesite	688	3	1729
Mouse	ENSMUSG00000036299	transcript6920.18.nnic	novel_not_in_catalog	at_least_one_novel_splicesite	944	3	1728
Mouse	ENSMUSG00000007850	transcript6077.11.nnic	novel_not_in_catalog	at_least_one_novel_splicesite	1155	5	1715
Mouse	ENSMUSG00000037935	transcript20827.11.nnic	novel_not_in_catalog	at_least_one_novel_splicesite	985	7	1704
Mouse	ENSMUSG00000036748	transcript9803.19.nnic	novel_not_in_catalog	at_least_one_novel_splicesite	1110	9	1703
Mouse	ENSMUSG00000020496	transcript8169.11.nnic	novel_not_in_catalog	at_least_one_novel_splicesite	569	2	1688
Mouse	ENSMUSG00000085438	transcript14678.2.nnic	novel_not_in_catalog	at_least_one_novel_splicesite	1374	2	1680
Mouse	ENSMUSG00000021288	transcript11101.12.nnic	novel_not_in_catalog	at_least_one_novel_splicesite	560	2	1662
Mouse	ENSMUSG00000006442	transcript18780.4.nnic	novel_not_in_catalog	at_least_one_novel_splicesite	1174	6	1646
Mouse	ENSMUSG00000026918	transcript3943.2.nnic	novel_not_in_catalog	at_least_one_novel_splicesite	885	2	1633
Mouse	ENSMUSG00000021973	transcript7534.14.nnic	novel_not_in_catalog	at_least_one_novel_splicesite	1021	2	1633
Mouse	ENSMUSG00000008036	transcript3235.7.nnic	novel_not_in_catalog	at_least_one_novel_splicesite	987	5	1625
Mouse	ENSMUSG00000066705	transcript5030.9.nnic	novel_not_in_catalog	at_least_one_novel_splicesite	532	2	1610
Mouse	ENSMUSG00000033047	transcript7358.15.nnic	novel_not_in_catalog	at_least_one_novel_splicesite	1097	7	1609
Mouse	ENSMUSG00000019039	transcript16970.9.nnic	novel_not_in_catalog	intron_retention	1194	2	1603
Mouse	ENSMUSG00000024026	transcript6929.17.nnic	novel_not_in_catalog	at_least_one_novel_splicesite	501	2	1587
Mouse	ENSMUSG00000032301	transcript6781.9.nnic	novel_not_in_catalog	at_least_one_novel_splicesite	656	5	1586
Mouse	ENSMUSG00000045573	transcript294.4.nnic	novel_not_in_catalog	at_least_one_novel_splicesite	1249	4	1584
Mouse	ENSMUSG00000015291	transcript4498.X.nnic	novel_not_in_catalog	at_least_one_novel_splicesite	598	2	1574
Mouse	ENSMUSG00000027133	transcript13367.2.nnic	novel_not_in_catalog	at_least_one_novel_splicesite	427	2	1571
Mouse	ENSMUSG00000021709	transcript10822.13.nnic	novel_not_in_catalog	at_least_one_novel_splicesite	2620	4	1564
Mouse	ENSMUSG00000063065	transcript25140.7.nnic	novel_not_in_catalog	at_least_one_novel_splicesite	1036	5	1561
Mouse	ENSMUSG00000024997	transcript11530.19.nnic	novel_not_in_catalog	at_least_one_novel_splicesite	1335	6	1554
Mouse	ENSMUSG00000018446	transcript13486.11.nnic	novel_not_in_catalog	at_least_one_novel_splicesite	520	2	1551
Mouse	ENSMUSG00000026249	transcript7878.1.nnic	novel_not_in_catalog	at_least_one_novel_splicesite	594	2	1549
Mouse	ENSMUSG00000029126	transcript4512.5.nnic	novel_not_in_catalog	intron_retention	1633	5	1522
Mouse	ENSMUSG00000028333	transcript4326.4.nnic	novel_not_in_catalog	at_least_one_novel_splicesite	577	3	1515
Mouse	ENSMUSG00000027404	transcript17110.2.nnic	novel_not_in_catalog	at_least_one_novel_splicesite	331	2	1498
Mouse	ENSMUSG00000022031	transcript8361.14.nnic	novel_not_in_catalog	at_least_one_novel_splicesite	1710	6	1476
Mouse	ENSMUSG00000038502	transcript11734.7.nnic	novel_not_in_catalog	intron_retention	958	7	1445
Mouse	ENSMUSG00000023904	transcript2526.17.nnic	novel_not_in_catalog	at_least_one_novel_splicesite	928	4	1444
Mouse	ENSMUSG00000029163	transcript2502.5.nnic	novel_not_in_catalog	at_least_one_novel_splicesite	2331	5	1437
Mouse	ENSMUSG00000032097	transcript4673.9.nnic	novel_not_in_catalog	at_least_one_novel_splicesite	851	2	1422
Mouse	ENSMUSG00000029622	transcript20485.5.nnic	novel_not_in_catalog	at_least_one_novel_splicesite	585	4	1410
Mouse	ENSMUSG00000039953	transcript19165.4.nnic	novel_not_in_catalog	at_least_one_novel_splicesite	576	2	1407
Mouse	ENSMUSG00000021027	transcript3839.12.nnic	novel_not_in_catalog	at_least_one_novel_splicesite	2266	2	1394
Mouse	ENSMUSG00000009630	transcript3310.8.nnic	novel_not_in_catalog	at_least_one_novel_splicesite	1637	7	1392
Mouse	ENSMUSG00000005656	transcript3417.12.nnic	novel_not_in_catalog	intron_retention	2027	13	1377
Mouse	ENSMUSG00000017493	transcript20781.11.nnic	novel_not_in_catalog	at_least_one_novel_splicesite	724	2	1376
Mouse	ENSMUSG00000001525	transcript10617.17.nnic	novel_not_in_catalog	at_least_one_novel_splicesite	342	2	1376
Mouse	ENSMUSG00000060147	transcript1970.13.nnic	novel_not_in_catalog	at_least_one_novel_splicesite	1553	7	1370
Mouse	ENSMUSG00000026360	transcript13768.1.nnic	novel_not_in_catalog	at_least_one_novel_splicesite	1905	5	1364
Mouse	ENSMUSG00000031004	transcript27613.7.nnic	novel_not_in_catalog	at_least_one_novel_splicesite	949	3	1363
Mouse	ENSMUSG00000024587	transcript5878.18.nnic	novel_not_in_catalog	at_least_one_novel_splicesite	1186	5	1363
Mouse	ENSMUSG00000029661	transcript290.6.nnic	novel_not_in_catalog	at_least_one_novel_splicesite	512	2	1358
Mouse	ENSMUSG00000005846	transcript1285.16.nnic	novel_not_in_catalog	at_least_one_novel_splicesite	974	2	1333
Mouse	ENSMUSG00000044408	transcript3397.12.nnic	novel_not_in_catalog	at_least_one_novel_splicesite	749	3	1332
Mouse	ENSMUSG00000028822	transcript15611.4.nnic	novel_not_in_catalog	at_least_one_novel_splicesite	1276	7	1328
Mouse	ENSMUSG00000029106	transcript3981.5.nnic	novel_not_in_catalog	at_least_one_novel_splicesite	501	2	1321
Mouse	ENSMUSG00000018666	transcript19481.11.nnic	novel_not_in_catalog	at_least_one_novel_splicesite	1039	5	1311
Mouse	ENSMUSG00000077450	transcript8036.17.nnic	novel_not_in_catalog	at_least_one_novel_splicesite	843	3	1296
Mouse	ENSMUSG00000002732	transcript9927.2.nnic	novel_not_in_catalog	at_least_one_novel_splicesite	938	4	1282
Mouse	ENSMUSG00000022324	transcript1631.15.nnic	novel_not_in_catalog	at_least_one_novel_splicesite	1149	6	1275
Mouse	ENSMUSG00000003346	transcript8796.10.nnic	novel_not_in_catalog	at_least_one_novel_splicesite	1199	5	1270
Mouse	ENSMUSG00000059277	transcript31760.7.nnic	novel_not_in_catalog	at_least_one_novel_splicesite	421	2	1268
Mouse	ENSMUSG00000029833	transcript2968.6.nnic	novel_not_in_catalog	at_least_one_novel_splicesite	2421	11	1262
Mouse	ENSMUSG00000022390	transcript8602.15.nnic	novel_not_in_catalog	at_least_one_novel_splicesite	821	2	1253
Mouse	ENSMUSG00000023484	transcript12140.15.nnic	novel_not_in_catalog	at_least_one_novel_splicesite	1390	8	1248
Mouse	ENSMUSG00000026020	transcript4698.1.nnic	novel_not_in_catalog	at_least_one_novel_splicesite	2128	16	1238
Mouse	ENSMUSG00000052854	transcript8588.X.nnic	novel_not_in_catalog	at_least_one_novel_splicesite	1150	2	1231
Mouse	ENSMUSG00000022234	transcript1394.15.nnic	novel_not_in_catalog	at_least_one_novel_splicesite	919	7	1217
Mouse	ENSMUSG00000010376	transcript6948.14.nnic	novel_not_in_catalog	intron_retention	376	2	1215
Mouse	ENSMUSG00000046402	transcript14685.9.nnic	novel_not_in_catalog	at_least_one_novel_splicesite	456	3	1207
Mouse	ENSMUSG00000000171	transcript5861.9.nnic	novel_not_in_catalog	at_least_one_novel_splicesite	529	2	1202
Mouse	ENSMUSG00000018379	transcript17649.11.nnic	novel_not_in_catalog	intron_retention	943	2	1199
Mouse	ENSMUSG00000060802	transcript15924.2.nnic	novel_not_in_catalog	at_least_one_novel_splicesite	897	3	1198
Mouse	ENSMUSG00000003345	transcript8969.10.nnic	novel_not_in_catalog	at_least_one_novel_splicesite	683	2	1196
Mouse	ENSMUSG00000026112	transcript2028.1.nnic	novel_not_in_catalog	at_least_one_novel_splicesite	921	2	1190
Mouse	ENSMUSG00000024357	transcript2399.18.nnic	novel_not_in_catalog	at_least_one_novel_splicesite	1276	7	1190
Mouse	ENSMUSG00000003131	transcript5176.9.nnic	novel_not_in_catalog	at_least_one_novel_splicesite	946	6	1185
Mouse	ENSMUSG00000032216	transcript11685.9.nnic	novel_not_in_catalog	at_least_one_novel_splicesite	1517	2	1182
Mouse	ENSMUSG00000037894	transcript15135.3.nnic	novel_not_in_catalog	at_least_one_novel_splicesite	1261	5	1177
Mouse	ENSMUSG00000023010	transcript12412.15.nnic	novel_not_in_catalog	at_least_one_novel_splicesite	547	4	1173
Mouse	ENSMUSG00000026657	transcript177.2.nnic	novel_not_in_catalog	at_least_one_novel_splicesite	2097	2	1170
Mouse	ENSMUSG00000031807	transcript7755.8.nnic	novel_not_in_catalog	at_least_one_novel_splicesite	471	4	1165
Mouse	ENSMUSG00000035171	transcript6701.19.nnic	novel_not_in_catalog	at_least_one_novel_splicesite	1347	3	1161
Mouse	ENSMUSG00000019433	transcript9558.8.nnic	novel_not_in_catalog	at_least_one_novel_splicesite	1339	6	1158
Mouse	ENSMUSG00000028180	transcript16915.3.nnic	novel_not_in_catalog	at_least_one_novel_splicesite	1023	5	1155
Mouse	ENSMUSG00000029472	transcript13436.5.nnic	novel_not_in_catalog	at_least_one_novel_splicesite	966	7	1151
Mouse	ENSMUSG00000022698	transcript6674.16.nnic	novel_not_in_catalog	at_least_one_novel_splicesite	924	2	1145
Mouse	ENSMUSG00000022750	transcript2383.16.nnic	novel_not_in_catalog	at_least_one_novel_splicesite	1901	6	1123
Mouse	ENSMUSG00000031555	transcript2206.8.nnic	novel_not_in_catalog	at_least_one_novel_splicesite	1528	3	1120
Mouse	ENSMUSG00000008348	transcript14645.5.nnic	novel_not_in_catalog	at_least_one_novel_splicesite	1953	3	1115
Mouse	ENSMUSG00000024925	transcript2598.19.nnic	novel_not_in_catalog	at_least_one_novel_splicesite	874	5	1108
Mouse	ENSMUSG00000022661	transcript6934.16.nnic	novel_not_in_catalog	at_least_one_novel_splicesite	1467	2	1106
Mouse	ENSMUSG00000021670	transcript9752.13.nnic	novel_not_in_catalog	at_least_one_novel_splicesite	446	2	1102
Mouse	ENSMUSG00000029478	transcript14580.5.nnic	novel_not_in_catalog	at_least_one_novel_splicesite	727	2	1100
Mouse	ENSMUSG00000004897	transcript5728.3.nnic	novel_not_in_catalog	at_least_one_novel_splicesite	527	2	1084
Mouse	ENSMUSG00000032482	transcript17567.9.nnic	novel_not_in_catalog	at_least_one_novel_splicesite	857	4	1078
Mouse	ENSMUSG00000001783	transcript10997.10.nnic	novel_not_in_catalog	at_least_one_novel_splicesite	1180	6	1073
Mouse	ENSMUSG00000024091	transcript15958.17.nnic	novel_not_in_catalog	at_least_one_novel_splicesite	559	2	1073
Mouse	ENSMUSG00000094638	transcript8267.1.nnic	novel_not_in_catalog	at_least_one_novel_splicesite	488	4	1072
Mouse	ENSMUSG00000029304	transcript9186.5.nnic	novel_not_in_catalog	at_least_one_novel_splicesite	526	2	1072
Mouse	ENSMUSG00000030541	transcript16737.7.nnic	novel_not_in_catalog	at_least_one_novel_splicesite	570	4	1064
Mouse	ENSMUSG00000024583	transcript5759.18.nnic	novel_not_in_catalog	at_least_one_novel_splicesite	1095	8	1063
Mouse	ENSMUSG00000070319	transcript1265.9.nnic	novel_not_in_catalog	at_least_one_novel_splicesite	760	7	1050
Mouse	ENSMUSG00000024425	transcript3611.18.nnic	novel_not_in_catalog	at_least_one_novel_splicesite	1729	8	1041
Mouse	ENSMUSG00000004264	transcript13234.6.nnic	novel_not_in_catalog	at_least_one_novel_splicesite	1432	10	1040
Mouse	ENSMUSG00000006095	transcript8431.7.nnic	novel_not_in_catalog	at_least_one_novel_splicesite	952	6	1033
Mouse	ENSMUSG00000024513	transcript6572.18.nnic	novel_not_in_catalog	at_least_one_novel_splicesite	1076	5	1033
Mouse	ENSMUSG00000030161	transcript15488.6.nnic	novel_not_in_catalog	at_least_one_novel_splicesite	549	2	1032
Mouse	ENSMUSG00000084957	transcript10809.19.nnic	novel_not_in_catalog	at_least_one_novel_splicesite	1136	4	1028
Mouse	ENSMUSG00000031548	transcript2157.8.nnic	novel_not_in_catalog	at_least_one_novel_splicesite	1151	4	1019
Mouse	ENSMUSG00000025007	transcript8560.19.nnic	novel_not_in_catalog	at_least_one_novel_splicesite	2321	10	1010
Mouse	ENSMUSG00000002625	transcript7508.17.nnic	novel_not_in_catalog	at_least_one_novel_splicesite	1568	5	1006
Mouse	ENSMUSG00000027288	transcript14934.2.nnic	novel_not_in_catalog	at_least_one_novel_splicesite	1155	2	1000
Mouse	ENSMUSG00000037089	transcript12485.17.nnic	novel_not_in_catalog	at_least_one_novel_splicesite	1282	4	993
Mouse	ENSMUSG00000014294	transcript3104.18.nnic	novel_not_in_catalog	at_least_one_novel_splicesite	472	3	983
Mouse	ENSMUSG00000042675	transcript25289.7.nnic	novel_not_in_catalog	intron_retention	951	3	981
Mouse	ENSMUSG00000029621	transcript20240.5.nnic	novel_not_in_catalog	at_least_one_novel_splicesite	385	2	961
Mouse	ENSMUSG00000031529	transcript3596.8.nnic	novel_not_in_catalog	at_least_one_novel_splicesite	686	2	961
Mouse	ENSMUSG00000031239	transcript6840.X.nnic	novel_not_in_catalog	at_least_one_novel_splicesite	696	2	957
Mouse	ENSMUSG00000002844	transcript6203.16.nnic	novel_not_in_catalog	at_least_one_novel_splicesite	786	3	950
Mouse	ENSMUSG00000040385	transcript844.19.nnic	novel_not_in_catalog	at_least_one_novel_splicesite	1441	7	949
Mouse	ENSMUSG00000034203	transcript9933.6.nnic	novel_not_in_catalog	at_least_one_novel_splicesite	1493	3	939
Mouse	ENSMUSG00000038650	transcript28754.7.nnic	novel_not_in_catalog	at_least_one_novel_splicesite	922	6	936
Mouse	ENSMUSG00000013076	transcript574.9.nnic	novel_not_in_catalog	at_least_one_novel_splicesite	484	2	936
Mouse	ENSMUSG00000001506	transcript18738.11.nnic	novel_not_in_catalog	at_least_one_novel_splicesite	444	2	929
Mouse	ENSMUSG00000034473	transcript5405.16.nnic	novel_not_in_catalog	at_least_one_novel_splicesite	1206	4	929
Mouse	ENSMUSG00000020205	transcript13275.10.nnic	novel_not_in_catalog	at_least_one_novel_splicesite	833	2	928
Mouse	ENSMUSG00000000001	transcript12542.3.nnic	novel_not_in_catalog	at_least_one_novel_splicesite	947	2	926
Mouse	ENSMUSG00000023456	transcript13638.6.nnic	novel_not_in_catalog	at_least_one_novel_splicesite	1312	7	921
Mouse	ENSMUSG00000021102	transcript9554.12.nnic	novel_not_in_catalog	at_least_one_novel_splicesite	463	2	921
Mouse	ENSMUSG00000022498	transcript1215.16.nnic	novel_not_in_catalog	at_least_one_novel_splicesite	1169	2	921
Mouse	ENSMUSG00000032253	transcript13098.9.nnic	novel_not_in_catalog	at_least_one_novel_splicesite	1370	2	916
Mouse	ENSMUSG00000029559	transcript11427.5.nnic	novel_not_in_catalog	at_least_one_novel_splicesite	1449	6	911
Mouse	ENSMUSG00000025268	transcript9116.X.nnic	novel_not_in_catalog	at_least_one_novel_splicesite	381	4	906
Mouse	ENSMUSG00000042766	transcript7262.3.nnic	novel_not_in_catalog	at_least_one_novel_splicesite	411	3	893
Mouse	ENSMUSG00000045539	transcript8628.3.nnic	novel_not_in_catalog	at_least_one_novel_splicesite	1107	2	891
Mouse	ENSMUSG00000047139	transcript3604.10.nnic	novel_not_in_catalog	at_least_one_novel_splicesite	951	2	884
Mouse	ENSMUSG00000004849	transcript17668.5.nnic	novel_not_in_catalog	at_least_one_novel_splicesite	405	3	877
Mouse	ENSMUSG00000020794	transcript13812.11.nnic	novel_not_in_catalog	at_least_one_novel_splicesite	1675	6	873
Mouse	ENSMUSG00000021540	transcript6133.13.nnic	novel_not_in_catalog	at_least_one_novel_splicesite	1166	2	871
Mouse	ENSMUSG00000023089	transcript1478.6.nnic	novel_not_in_catalog	at_least_one_novel_splicesite	545	5	868
Mouse	ENSMUSG00000028763	transcript16619.4.nnic	novel_not_in_catalog	at_least_one_novel_splicesite	666	2	859
Mouse	ENSMUSG00000031231	transcript6669.X.nnic	novel_not_in_catalog	at_least_one_novel_splicesite	941	4	859
Mouse	ENSMUSG00000049401	transcript26550.2.nnic	novel_not_in_catalog	at_least_one_novel_splicesite	1389	2	858
Mouse	ENSMUSG00000019942	transcript5510.10.nnic	novel_not_in_catalog	at_least_one_novel_splicesite	834	6	847
Mouse	ENSMUSG00000022013	transcript10179.14.nnic	novel_not_in_catalog	at_least_one_novel_splicesite	951	6	844
Mouse	ENSMUSG00000062981	transcript12362.10.nnic	novel_not_in_catalog	at_least_one_novel_splicesite	763	7	831
Mouse	ENSMUSG00000051989	transcript9602.16.nnic	novel_not_in_catalog	at_least_one_novel_splicesite	600	4	828
Mouse	ENSMUSG00000040025	transcript14481.4.nnic	novel_not_in_catalog	at_least_one_novel_splicesite	1236	4	825
Mouse	ENSMUSG00000057130	transcript7460.18.nnic	novel_not_in_catalog	at_least_one_novel_splicesite	823	5	825
Mouse	ENSMUSG00000029126	transcript4544.5.nnic	novel_not_in_catalog	at_least_one_novel_splicesite	575	4	823
Mouse	ENSMUSG00000047260	transcript13969.11.nnic	novel_not_in_catalog	at_least_one_novel_splicesite	633	2	822
Mouse	ENSMUSG00000026727	transcript1231.2.nnic	novel_not_in_catalog	at_least_one_novel_splicesite	742	2	815
Mouse	ENSMUSG00000032624	transcript17824.17.nnic	novel_not_in_catalog	at_least_one_novel_splicesite	998	2	811
Mouse	ENSMUSG00000015247	transcript4721.4.nnic	novel_not_in_catalog	at_least_one_novel_splicesite	1441	6	809
Mouse	ENSMUSG00000000171	transcript5769.9.nnic	novel_not_in_catalog	at_least_one_novel_splicesite	1113	5	808
Mouse	ENSMUSG00000008333	transcript18434.2.nnic	novel_not_in_catalog	at_least_one_novel_splicesite	921	7	807
Mouse	ENSMUSG00000044496	transcript18553.4.nnic	novel_not_in_catalog	at_least_one_novel_splicesite	1664	3	806
Mouse	ENSMUSG00000024420	transcript835.18.nnic	novel_not_in_catalog	at_least_one_novel_splicesite	1273	5	806
Mouse	ENSMUSG00000029661	transcript284.6.nnic	novel_not_in_catalog	at_least_one_novel_splicesite	1087	2	799
Mouse	ENSMUSG00000104208	transcript16696.9.nnic	novel_not_in_catalog	at_least_one_novel_splicesite	676	2	790
Mouse	ENSMUSG00000004268	transcript13344.6.nnic	novel_not_in_catalog	at_least_one_novel_splicesite	1111	6	788
Mouse	ENSMUSG00000041112	transcript1060.13.nnic	novel_not_in_catalog	at_least_one_novel_splicesite	2207	7	787
Mouse	ENSMUSG00000024527	transcript6214.18.nnic	novel_not_in_catalog	at_least_one_novel_splicesite	941	2	781
Mouse	ENSMUSG00000000247	transcript6740.2.nnic	novel_not_in_catalog	at_least_one_novel_splicesite	1266	3	779
Mouse	ENSMUSG00000035783	transcript7959.19.nnic	novel_not_in_catalog	at_least_one_novel_splicesite	260	2	772
Mouse	ENSMUSG00000022607	transcript4458.15.nnic	novel_not_in_catalog	at_least_one_novel_splicesite	1920	11	769
Mouse	ENSMUSG00000025495	transcript28733.7.nnic	novel_not_in_catalog	at_least_one_novel_splicesite	1661	7	766
Mouse	ENSMUSG00000037296	transcript2587.8.nnic	novel_not_in_catalog	at_least_one_novel_splicesite	1078	4	766
Mouse	ENSMUSG00000021215	transcript148.13.nnic	novel_not_in_catalog	at_least_one_novel_splicesite	1150	2	765
Mouse	ENSMUSG00000019877	transcript4076.10.nnic	novel_not_in_catalog	at_least_one_novel_splicesite	954	2	763
Mouse	ENSMUSG00000025410	transcript14826.10.nnic	novel_not_in_catalog	at_least_one_novel_splicesite	363	2	763
Mouse	ENSMUSG00000028847	transcript12290.4.nnic	novel_not_in_catalog	at_least_one_novel_splicesite	1219	4	758
Mouse	ENSMUSG00000026960	transcript7759.2.nnic	novel_not_in_catalog	at_least_one_novel_splicesite	1504	4	756
Mouse	ENSMUSG00000050071	transcript7971.X.nnic	novel_not_in_catalog	at_least_one_novel_splicesite	276	2	756
Mouse	ENSMUSG00000027366	transcript16453.2.nnic	novel_not_in_catalog	at_least_one_novel_splicesite	1603	2	753
Mouse	ENSMUSG00000031024	transcript22124.7.nnic	novel_not_in_catalog	at_least_one_novel_splicesite	1371	7	751
Mouse	ENSMUSG00000031954	transcript14916.8.nnic	novel_not_in_catalog	at_least_one_novel_splicesite	563	3	745
Mouse	ENSMUSG00000029328	transcript8437.5.nnic	novel_not_in_catalog	at_least_one_novel_splicesite	1130	7	741
Mouse	ENSMUSG00000029616	transcript12858.5.nnic	novel_not_in_catalog	at_least_one_novel_splicesite	429	2	741
Mouse	ENSMUSG00000024197	transcript14989.17.nnic	novel_not_in_catalog	at_least_one_novel_splicesite	2225	8	738
Mouse	ENSMUSG00000021241	transcript7442.12.nnic	novel_not_in_catalog	at_least_one_novel_splicesite	770	3	737
Mouse	ENSMUSG00000014846	transcript13167.8.nnic	novel_not_in_catalog	at_least_one_novel_splicesite	1223	4	735
Mouse	ENSMUSG00000020719	transcript24505.11.nnic	novel_not_in_catalog	at_least_one_novel_splicesite	1191	3	735
Mouse	ENSMUSG00000029291	transcript7610.5.nnic	novel_not_in_catalog	at_least_one_novel_splicesite	552	2	734
Mouse	ENSMUSG00000057858	transcript11396.19.nnic	novel_not_in_catalog	at_least_one_novel_splicesite	943	5	734
Mouse	ENSMUSG00000052296	transcript949.7.nnic	novel_not_in_catalog	at_least_one_novel_splicesite	1395	8	733
Mouse	ENSMUSG00000020171	transcript13652.10.nnic	novel_not_in_catalog	at_least_one_novel_splicesite	1425	7	729
Mouse	ENSMUSG00000085587	transcript799.X.nnic	novel_not_in_catalog	at_least_one_novel_splicesite	596	2	727
Mouse	ENSMUSG00000050359	transcript8659.3.nnic	novel_not_in_catalog	at_least_one_novel_splicesite	430	2	722
Mouse	ENSMUSG00000006728	transcript14303.10.nnic	novel_not_in_catalog	at_least_one_novel_splicesite	1248	8	721
Mouse	ENSMUSG00000022658	transcript7010.16.nnic	novel_not_in_catalog	at_least_one_novel_splicesite	657	3	720
Mouse	ENSMUSG00000036896	transcript16439.4.nnic	novel_not_in_catalog	at_least_one_novel_splicesite	1119	3	719
Mouse	ENSMUSG00000025402	transcript14997.10.nnic	novel_not_in_catalog	at_least_one_novel_splicesite	950	2	719
Mouse	ENSMUSG00000007815	transcript16668.9.nnic	novel_not_in_catalog	at_least_one_novel_splicesite	1103	3	710
Mouse	ENSMUSG00000023022	transcript12696.15.nnic	novel_not_in_catalog	at_least_one_novel_splicesite	823	2	709
Mouse	ENSMUSG00000018547	transcript20096.11.nnic	novel_not_in_catalog	at_least_one_novel_splicesite	791	2	705
Mouse	ENSMUSG00000040249	transcript14968.10.nnic	novel_not_in_catalog	at_least_one_novel_splicesite	264	2	696
Mouse	ENSMUSG00000026678	transcript16652.1.nnic	novel_not_in_catalog	at_least_one_novel_splicesite	1433	2	695
Mouse	ENSMUSG00000003464	transcript17565.1.nnic	novel_not_in_catalog	at_least_one_novel_splicesite	1879	8	691
Mouse	ENSMUSG00000028136	transcript9110.3.nnic	novel_not_in_catalog	at_least_one_novel_splicesite	690	2	690
Mouse	ENSMUSG00000026728	transcript1255.2.nnic	novel_not_in_catalog	at_least_one_novel_splicesite	1861	10	689
Mouse	ENSMUSG00000031239	transcript6801.X.nnic	novel_not_in_catalog	at_least_one_novel_splicesite	1633	6	684
Mouse	ENSMUSG00000022337	transcript2738.15.nnic	novel_not_in_catalog	at_least_one_novel_splicesite	390	2	682
Mouse	ENSMUSG00000027447	transcript19147.2.nnic	novel_not_in_catalog	at_least_one_novel_splicesite	195	2	681
Mouse	ENSMUSG00000028138	transcript15366.3.nnic	novel_not_in_catalog	at_least_one_novel_splicesite	797	5	674
Mouse	ENSMUSG00000052962	transcript6682.6.nnic	novel_not_in_catalog	at_least_one_novel_splicesite	950	4	674
Mouse	ENSMUSG00000037362	transcript3132.15.nnic	novel_not_in_catalog	at_least_one_novel_splicesite	1280	2	674
Mouse	ENSMUSG00000028936	transcript19890.4.nnic	novel_not_in_catalog	at_least_one_novel_splicesite	338	2	666
Mouse	ENSMUSG00000026126	transcript1600.1.nnic	novel_not_in_catalog	at_least_one_novel_splicesite	625	3	660
Mouse	ENSMUSG00000028657	transcript11193.4.nnic	novel_not_in_catalog	at_least_one_novel_splicesite	1249	10	660
Mouse	ENSMUSG00000015488	transcript3872.2.nnic	novel_not_in_catalog	at_least_one_novel_splicesite	1043	2	658
Mouse	ENSMUSG00000003410	transcript2419.9.nnic	novel_not_in_catalog	at_least_one_novel_splicesite	1214	2	653
Mouse	ENSMUSG00000000253	transcript3865.13.nnic	novel_not_in_catalog	at_least_one_novel_splicesite	883	5	648
Mouse	ENSMUSG00000022995	transcript18954.1.nnic	novel_not_in_catalog	at_least_one_novel_splicesite	1064	2	645
Mouse	ENSMUSG00000096768	transcript592.Y.nnic	novel_not_in_catalog	at_least_one_novel_splicesite	973	3	645
Mouse	ENSMUSG00000022951	transcript9632.16.nnic	novel_not_in_catalog	at_least_one_novel_splicesite	1330	5	643
Mouse	ENSMUSG00000044550	transcript8354.X.nnic	novel_not_in_catalog	at_least_one_novel_splicesite	1123	3	641
Mouse	ENSMUSG00000032216	transcript11701.9.nnic	novel_not_in_catalog	at_least_one_novel_splicesite	444	2	638
Mouse	ENSMUSG00000017119	transcript22695.11.nnic	novel_not_in_catalog	at_least_one_novel_splicesite	452	3	637
Mouse	ENSMUSG00000019054	transcript17500.5.nnic	novel_not_in_catalog	at_least_one_novel_splicesite	358	2	636
Mouse	ENSMUSG00000004667	transcript7924.10.nnic	novel_not_in_catalog	at_least_one_novel_splicesite	1250	7	636
Mouse	ENSMUSG00000058709	transcript6156.7.nnic	novel_not_in_catalog	at_least_one_novel_splicesite	1947	5	634
Mouse	ENSMUSG00000020801	transcript13716.11.nnic	novel_not_in_catalog	at_least_one_novel_splicesite	873	4	632
Mouse	ENSMUSG00000019699	transcript18139.1.nnic	novel_not_in_catalog	at_least_one_novel_splicesite	1237	2	630
Mouse	ENSMUSG00000067194	transcript9912.X.nnic	novel_not_in_catalog	at_least_one_novel_splicesite	1010	7	629
Mouse	ENSMUSG00000029020	transcript18530.4.nnic	novel_not_in_catalog	at_least_one_novel_splicesite	1246	2	627
Mouse	ENSMUSG00000022476	transcript8710.15.nnic	novel_not_in_catalog	at_least_one_novel_splicesite	1121	6	625
Mouse	ENSMUSG00000004849	transcript17679.5.nnic	novel_not_in_catalog	at_least_one_novel_splicesite	790	3	624
Mouse	ENSMUSG00000068184	transcript11238.13.nnic	novel_not_in_catalog	at_least_one_novel_splicesite	924	4	623
Mouse	ENSMUSG00000039476	transcript4983.2.nnic	novel_not_in_catalog	at_least_one_novel_splicesite	947	4	618
Mouse	ENSMUSG00000021957	transcript2826.14.nnic	novel_not_in_catalog	at_least_one_novel_splicesite	1203	8	618
Mouse	ENSMUSG00000074657	transcript14680.10.nnic	novel_not_in_catalog	at_least_one_novel_splicesite	992	2	617
Mouse	ENSMUSG00000040236	transcript198.8.nnic	novel_not_in_catalog	at_least_one_novel_splicesite	405	4	615
Mouse	ENSMUSG00000059878	transcript12118.6.nnic	novel_not_in_catalog	at_least_one_novel_splicesite	1349	3	614
Mouse	ENSMUSG00000002980	transcript4753.7.nnic	novel_not_in_catalog	at_least_one_novel_splicesite	1500	8	611
Mouse	ENSMUSG00000061731	transcript3075.15.nnic	novel_not_in_catalog	at_least_one_novel_splicesite	1692	10	611
Mouse	ENSMUSG00000043165	transcript8545.3.nnic	novel_not_in_catalog	at_least_one_novel_splicesite	671	2	608
Mouse	ENSMUSG00000024063	transcript16777.17.nnic	novel_not_in_catalog	at_least_one_novel_splicesite	839	4	606
Mouse	ENSMUSG00000039611	transcript4661.4.nnic	novel_not_in_catalog	at_least_one_novel_splicesite	1990	3	604
Mouse	ENSMUSG00000018326	transcript23149.2.nnic	novel_not_in_catalog	at_least_one_novel_splicesite	897	6	603
Mouse	ENSMUSG00000062234	transcript9823.5.nnic	novel_not_in_catalog	at_least_one_novel_splicesite	689	2	602
Mouse	ENSMUSG00000022283	transcript2046.15.nnic	novel_not_in_catalog	at_least_one_novel_splicesite	820	4	602
Mouse	ENSMUSG00000024258	transcript1630.18.nnic	novel_not_in_catalog	at_least_one_novel_splicesite	1127	3	601
Mouse	ENSMUSG00000048583	transcript31522.7.nnic	novel_not_in_catalog	at_least_one_novel_splicesite	825	2	600
Mouse	ENSMUSG00000093930	transcript12164.13.nnic	novel_not_in_catalog	at_least_one_novel_splicesite	1843	2	600
Mouse	ENSMUSG00000056214	transcript7441.18.nnic	novel_not_in_catalog	at_least_one_novel_splicesite	1270	2	600
Mouse	ENSMUSG00000026202	transcript7350.1.nnic	novel_not_in_catalog	at_least_one_novel_splicesite	1586	4	597
Mouse	ENSMUSG00000019428	transcript6616.8.nnic	novel_not_in_catalog	at_least_one_novel_splicesite	450	3	597
Mouse	ENSMUSG00000045435	transcript831.5.nnic	novel_not_in_catalog	at_least_one_novel_splicesite	1202	2	596
Mouse	ENSMUSG00000056671	transcript3800.18.nnic	novel_not_in_catalog	at_least_one_novel_splicesite	553	4	595
Mouse	ENSMUSG00000019188	transcript19779.2.nnic	novel_not_in_catalog	at_least_one_novel_splicesite	858	3	591
Mouse	ENSMUSG00000038170	transcript10734.3.nnic	novel_not_in_catalog	at_least_one_novel_splicesite	1852	2	591
Mouse	ENSMUSG00000027962	transcript13085.3.nnic	novel_not_in_catalog	at_least_one_novel_splicesite	1150	2	591
Mouse	ENSMUSG00000030279	transcript16635.6.nnic	novel_not_in_catalog	intron_retention	3359	3	591
Mouse	ENSMUSG00000049536	transcript8445.X.nnic	novel_not_in_catalog	at_least_one_novel_splicesite	1222	2	590
Mouse	ENSMUSG00000022018	transcript10337.14.nnic	novel_not_in_catalog	at_least_one_novel_splicesite	491	2	589
Mouse	ENSMUSG00000026239	transcript8590.1.nnic	novel_not_in_catalog	at_least_one_novel_splicesite	682	3	588
Mouse	ENSMUSG00000001020	transcript8433.3.nnic	novel_not_in_catalog	at_least_one_novel_splicesite	527	3	588
Mouse	ENSMUSG00000028782	transcript13785.4.nnic	novel_not_in_catalog	at_least_one_novel_splicesite	917	5	586
Mouse	ENSMUSG00000020308	transcript7302.10.nnic	novel_not_in_catalog	at_least_one_novel_splicesite	846	2	584
Mouse	ENSMUSG00000018411	transcript23713.11.nnic	novel_not_in_catalog	at_least_one_novel_splicesite	295	2	583
Mouse	ENSMUSG00000075229	transcript5508.16.nnic	novel_not_in_catalog	at_least_one_novel_splicesite	1143	5	583
Mouse	ENSMUSG00000020180	transcript5960.10.nnic	novel_not_in_catalog	at_least_one_novel_splicesite	589	4	582
Mouse	ENSMUSG00000031312	transcript5919.X.nnic	novel_not_in_catalog	at_least_one_novel_splicesite	424	2	582
Mouse	ENSMUSG00000036199	transcript5749.8.nnic	novel_not_in_catalog	intron_retention	1918	4	581
Mouse	ENSMUSG00000069833	transcript5421.19.nnic	novel_not_in_catalog	at_least_one_novel_splicesite	421	2	579
Mouse	ENSMUSG00000022340	transcript2891.15.nnic	novel_not_in_catalog	at_least_one_novel_splicesite	2390	5	576
Mouse	ENSMUSG00000022338	transcript2797.15.nnic	novel_not_in_catalog	at_least_one_novel_splicesite	774	5	574
Mouse	ENSMUSG00000048126	transcript9194.1.nnic	novel_not_in_catalog	at_least_one_novel_splicesite	636	2	573
Mouse	ENSMUSG00000031840	transcript6907.8.nnic	novel_not_in_catalog	at_least_one_novel_splicesite	658	3	571
Mouse	ENSMUSG00000020003	transcript1453.10.nnic	novel_not_in_catalog	at_least_one_novel_splicesite	754	3	571
Mouse	ENSMUSG00000004085	transcript9275.2.nnic	novel_not_in_catalog	at_least_one_novel_splicesite	1289	2	570
Mouse	ENSMUSG00000072582	transcript17275.11.nnic	novel_not_in_catalog	at_least_one_novel_splicesite	941	3	570
Mouse	ENSMUSG00000002731	transcript9899.2.nnic	novel_not_in_catalog	at_least_one_novel_splicesite	719	2	569
Mouse	ENSMUSG00000093989	transcript12672.11.nnic	novel_not_in_catalog	at_least_one_novel_splicesite	723	3	569
Mouse	ENSMUSG00000018102	transcript1300.13.nnic	novel_not_in_catalog	at_least_one_novel_splicesite	640	2	568
Mouse	ENSMUSG00000028031	transcript14594.3.nnic	novel_not_in_catalog	at_least_one_novel_splicesite	988	2	560
Mouse	ENSMUSG00000020241	transcript6507.10.nnic	novel_not_in_catalog	at_least_one_novel_splicesite	570	2	560
Mouse	ENSMUSG00000019579	transcript14905.17.nnic	novel_not_in_catalog	at_least_one_novel_splicesite	1107	6	558
Mouse	ENSMUSG00000024914	transcript1962.19.nnic	novel_not_in_catalog	at_least_one_novel_splicesite	748	7	557
Mouse	ENSMUSG00000005958	transcript3615.16.nnic	novel_not_in_catalog	at_least_one_novel_splicesite	891	4	556
Mouse	ENSMUSG00000064254	transcript5122.7.nnic	novel_not_in_catalog	at_least_one_novel_splicesite	988	7	554
Mouse	ENSMUSG00000013076	transcript576.9.nnic	novel_not_in_catalog	at_least_one_novel_splicesite	1181	2	553
Mouse	ENSMUSG00000086316	transcript9575.X.nnic	novel_not_in_catalog	at_least_one_novel_splicesite	869	4	552
Mouse	ENSMUSG00000026987	transcript7949.2.nnic	novel_not_in_catalog	at_least_one_novel_splicesite	1364	2	551
Mouse	ENSMUSG00000058799	transcript13223.10.nnic	novel_not_in_catalog	at_least_one_novel_splicesite	784	9	551
Mouse	ENSMUSG00000024346	transcript2835.18.nnic	novel_not_in_catalog	at_least_one_novel_splicesite	840	4	547
Mouse	ENSMUSG00000044894	transcript6913.11.nnic	novel_not_in_catalog	intron_retention	646	3	545
Mouse	ENSMUSG00000017390	transcript15579.11.nnic	novel_not_in_catalog	at_least_one_novel_splicesite	1580	9	545
Mouse	ENSMUSG00000041219	transcript13610.2.nnic	novel_not_in_catalog	intron_retention	2038	2	543
Mouse	ENSMUSG00000040345	transcript14846.10.nnic	novel_not_in_catalog	at_least_one_novel_splicesite	500	2	541
Mouse	ENSMUSG00000071645	transcript5358.19.nnic	novel_not_in_catalog	at_least_one_novel_splicesite	2072	6	541
Mouse	ENSMUSG00000021731	transcript12017.13.nnic	novel_not_in_catalog	at_least_one_novel_splicesite	1187	5	539
Mouse	ENSMUSG00000044349	transcript22526.2.nnic	novel_not_in_catalog	at_least_one_novel_splicesite	1695	2	537
Mouse	ENSMUSG00000017670	transcript24011.2.nnic	novel_not_in_catalog	at_least_one_novel_splicesite	1211	8	536
Mouse	ENSMUSG00000027499	transcript101.3.nnic	novel_not_in_catalog	at_least_one_novel_splicesite	927	2	536
Mouse	ENSMUSG00000022808	transcript5214.16.nnic	novel_not_in_catalog	at_least_one_novel_splicesite	1230	9	535
Mouse	ENSMUSG00000024792	transcript2981.19.nnic	novel_not_in_catalog	at_least_one_novel_splicesite	1382	8	535
Mouse	ENSMUSG00000025979	transcript3865.1.nnic	novel_not_in_catalog	at_least_one_novel_splicesite	1079	9	534
Mouse	ENSMUSG00000059714	transcript10329.17.nnic	novel_not_in_catalog	at_least_one_novel_splicesite	946	6	532
Mouse	ENSMUSG00000023089	transcript1530.6.nnic	novel_not_in_catalog	at_least_one_novel_splicesite	196	2	528
Mouse	ENSMUSG00000008348	transcript14905.5.nnic	novel_not_in_catalog	at_least_one_novel_splicesite	1945	2	527
Mouse	ENSMUSG00000042472	transcript7300.12.nnic	novel_not_in_catalog	intron_retention	1855	3	527
Mouse	ENSMUSG00000020705	transcript24322.11.nnic	novel_not_in_catalog	at_least_one_novel_splicesite	849	2	526
Mouse	ENSMUSG00000028670	transcript16089.4.nnic	novel_not_in_catalog	at_least_one_novel_splicesite	852	7	524
Mouse	ENSMUSG00000035198	transcript22155.11.nnic	novel_not_in_catalog	at_least_one_novel_splicesite	921	5	521
Mouse	ENSMUSG00000020150	transcript8601.10.nnic	novel_not_in_catalog	at_least_one_novel_splicesite	463	3	518
Mouse	ENSMUSG00000022225	transcript7190.14.nnic	novel_not_in_catalog	at_least_one_novel_splicesite	265	2	517
Mouse	ENSMUSG00000040212	transcript14221.7.nnic	novel_not_in_catalog	at_least_one_novel_splicesite	979	5	515
Mouse	ENSMUSG00000020368	transcript6025.11.nnic	novel_not_in_catalog	at_least_one_novel_splicesite	872	2	514
Mouse	ENSMUSG00000033808	transcript14875.2.nnic	novel_not_in_catalog	at_least_one_novel_splicesite	1796	9	513
Mouse	ENSMUSG00000019872	transcript4206.10.nnic	novel_not_in_catalog	at_least_one_novel_splicesite	1692	8	511
Mouse	ENSMUSG00000000532	transcript12979.15.nnic	novel_not_in_catalog	at_least_one_novel_splicesite	1188	2	511
Mouse	ENSMUSG00000079614	transcript6316.18.nnic	novel_not_in_catalog	at_least_one_novel_splicesite	1899	9	511
Mouse	ENSMUSG00000027706	transcript1774.3.nnic	novel_not_in_catalog	at_least_one_novel_splicesite	937	2	510
Mouse	ENSMUSG00000021036	transcript8349.12.nnic	novel_not_in_catalog	at_least_one_novel_splicesite	2157	2	509
Mouse	ENSMUSG00000024772	transcript3338.19.nnic	novel_not_in_catalog	at_least_one_novel_splicesite	1604	4	509
Mouse	ENSMUSG00000006304	transcript6797.1.nnic	novel_not_in_catalog	at_least_one_novel_splicesite	567	6	508
Mouse	ENSMUSG00000030805	transcript26319.7.nnic	novel_not_in_catalog	at_least_one_novel_splicesite	1684	11	501
Mouse	ENSMUSG00000023723	transcript17746.11.nnic	novel_not_in_catalog	at_least_one_novel_splicesite	800	3	498
Mouse	ENSMUSG00000054408	transcript4728.8.nnic	novel_not_in_catalog	at_least_one_novel_splicesite	718	2	497
Mouse	ENSMUSG00000021276	transcript10647.12.nnic	novel_not_in_catalog	at_least_one_novel_splicesite	1345	4	497
Mouse	ENSMUSG00000026603	transcript19560.1.nnic	novel_not_in_catalog	at_least_one_novel_splicesite	757	3	496
Mouse	ENSMUSG00000063800	transcript8419.4.nnic	novel_not_in_catalog	at_least_one_novel_splicesite	1218	8	496
Mouse	ENSMUSG00000025647	transcript17336.9.nnic	novel_not_in_catalog	at_least_one_novel_splicesite	403	2	496
Mouse	ENSMUSG00000085667	transcript14235.4.nnic	novel_not_in_catalog	at_least_one_novel_splicesite	858	2	493
Mouse	ENSMUSG00000025260	transcript9338.X.nnic	novel_not_in_catalog	at_least_one_novel_splicesite	521	4	491
Mouse	ENSMUSG00000032216	transcript11693.9.nnic	novel_not_in_catalog	at_least_one_novel_splicesite	1469	2	487
Mouse	ENSMUSG00000036057	transcript17599.9.nnic	novel_not_in_catalog	at_least_one_novel_splicesite	1728	6	486
Mouse	ENSMUSG00000024844	transcript1888.19.nnic	novel_not_in_catalog	at_least_one_novel_splicesite	873	4	482
Mouse	ENSMUSG00000020776	transcript26934.11.nnic	novel_not_in_catalog	at_least_one_novel_splicesite	1764	6	479
Mouse	ENSMUSG00000028581	transcript14168.4.nnic	novel_not_in_catalog	at_least_one_novel_splicesite	1072	2	478
Mouse	ENSMUSG00000002341	transcript5891.8.nnic	novel_not_in_catalog	at_least_one_novel_splicesite	862	2	471
Mouse	ENSMUSG00000024875	transcript1573.19.nnic	novel_not_in_catalog	at_least_one_novel_splicesite	1110	8	470
Mouse	ENSMUSG00000034573	transcript8882.5.nnic	novel_not_in_catalog	at_least_one_novel_splicesite	746	2	469
Mouse	ENSMUSG00000025228	transcript9962.19.nnic	novel_not_in_catalog	at_least_one_novel_splicesite	1470	12	469
Mouse	ENSMUSG00000021756	transcript11498.13.nnic	novel_not_in_catalog	at_least_one_novel_splicesite	892	2	468
Mouse	ENSMUSG00000063870	transcript14464.6.nnic	novel_not_in_catalog	at_least_one_novel_splicesite	240	2	466
Mouse	ENSMUSG00000000378	transcript1555.11.nnic	novel_not_in_catalog	at_least_one_novel_splicesite	842	4	466
Mouse	ENSMUSG00000096225	transcript16783.3.nnic	novel_not_in_catalog	at_least_one_novel_splicesite	891	3	464
Mouse	ENSMUSG00000019817	transcript918.10.nnic	novel_not_in_catalog	at_least_one_novel_splicesite	555	2	460
Mouse	ENSMUSG00000030060	transcript9346.6.nnic	novel_not_in_catalog	at_least_one_novel_splicesite	1698	6	459
Mouse	ENSMUSG00000066456	transcript13140.9.nnic	novel_not_in_catalog	at_least_one_novel_splicesite	1022	6	459
Mouse	ENSMUSG00000039640	transcript28551.11.nnic	novel_not_in_catalog	at_least_one_novel_splicesite	904	5	458
Mouse	ENSMUSG00000007987	transcript17344.5.nnic	novel_not_in_catalog	at_least_one_novel_splicesite	989	5	456
Mouse	ENSMUSG00000031972	transcript17730.8.nnic	novel_not_in_catalog	at_least_one_novel_splicesite	1581	8	455
Mouse	ENSMUSG00000058444	transcript8810.9.nnic	novel_not_in_catalog	at_least_one_novel_splicesite	834	8	451
Mouse	ENSMUSG00000050335	transcript4798.14.nnic	novel_not_in_catalog	at_least_one_novel_splicesite	551	3	451
Mouse	ENSMUSG00000039515	transcript4808.2.nnic	novel_not_in_catalog	at_least_one_novel_splicesite	1451	11	450
Mouse	ENSMUSG00000028926	transcript292.5.nnic	novel_not_in_catalog	at_least_one_novel_splicesite	337	2	450
Mouse	ENSMUSG00000020978	transcript4613.12.nnic	novel_not_in_catalog	at_least_one_novel_splicesite	1252	2	449
Mouse	ENSMUSG00000056692	transcript5810.17.nnic	novel_not_in_catalog	at_least_one_novel_splicesite	1197	2	448
Mouse	ENSMUSG00000010453	transcript1682.1.nnic	novel_not_in_catalog	at_least_one_novel_splicesite	970	4	445
Mouse	ENSMUSG00000029306	transcript9119.5.nnic	novel_not_in_catalog	at_least_one_novel_splicesite	568	2	437
Mouse	ENSMUSG00000015222	transcript5813.1.nnic	novel_not_in_catalog	at_least_one_novel_splicesite	580	2	434
Mouse	ENSMUSG00000003037	transcript7988.8.nnic	novel_not_in_catalog	at_least_one_novel_splicesite	869	8	434
Mouse	ENSMUSG00000026869	transcript6209.2.nnic	novel_not_in_catalog	at_least_one_novel_splicesite	1885	9	433
Mouse	ENSMUSG00000030035	transcript7792.6.nnic	novel_not_in_catalog	at_least_one_novel_splicesite	450	2	433
Mouse	ENSMUSG00000018189	transcript13722.1.nnic	novel_not_in_catalog	at_least_one_novel_splicesite	1381	11	432
Mouse	ENSMUSG00000048330	transcript22076.7.nnic	novel_not_in_catalog	at_least_one_novel_splicesite	1630	2	432
Mouse	ENSMUSG00000034265	transcript218.17.nnic	novel_not_in_catalog	at_least_one_novel_splicesite	1167	2	431
Mouse	ENSMUSG00000051048	transcript19407.7.nnic	novel_not_in_catalog	at_least_one_novel_splicesite	1237	4	428
Mouse	ENSMUSG00000037062	transcript15791.3.nnic	novel_not_in_catalog	at_least_one_novel_splicesite	1012	2	423
Mouse	ENSMUSG00000020635	transcript334.12.nnic	novel_not_in_catalog	at_least_one_novel_splicesite	1143	4	422
Mouse	ENSMUSG00000031838	transcript6975.8.nnic	novel_not_in_catalog	at_least_one_novel_splicesite	553	4	420
Mouse	ENSMUSG00000070565	transcript14666.1.nnic	novel_not_in_catalog	at_least_one_novel_splicesite	1879	2	419
Mouse	ENSMUSG00000021807	transcript1344.14.nnic	novel_not_in_catalog	at_least_one_novel_splicesite	957	8	418
Mouse	ENSMUSG00000020297	transcript3635.11.nnic	novel_not_in_catalog	at_least_one_novel_splicesite	1262	2	417
Mouse	ENSMUSG00000031987	transcript18366.8.nnic	novel_not_in_catalog	at_least_one_novel_splicesite	1015	4	415
Mouse	ENSMUSG00000031626	transcript4089.8.nnic	novel_not_in_catalog	at_least_one_novel_splicesite	987	2	414
Mouse	ENSMUSG00000017969	transcript24341.2.nnic	novel_not_in_catalog	at_least_one_novel_splicesite	1223	6	413
Mouse	ENSMUSG00000015943	transcript10343.3.nnic	novel_not_in_catalog	at_least_one_novel_splicesite	593	2	413
Mouse	ENSMUSG00000032366	transcript10952.9.nnic	novel_not_in_catalog	at_least_one_novel_splicesite	359	2	411
Mouse	ENSMUSG00000003039	transcript8048.8.nnic	novel_not_in_catalog	at_least_one_novel_splicesite	1100	5	410
Mouse	ENSMUSG00000058690	transcript3932.14.nnic	novel_not_in_catalog	at_least_one_novel_splicesite	744	2	409
Mouse	ENSMUSG00000025959	transcript5534.1.nnic	novel_not_in_catalog	at_least_one_novel_splicesite	868	2	406
Mouse	ENSMUSG00000024833	transcript2919.19.nnic	novel_not_in_catalog	at_least_one_novel_splicesite	694	4	403
Mouse	ENSMUSG00000049881	transcript14685.1.nnic	novel_not_in_catalog	at_least_one_novel_splicesite	713	4	402
Mouse	ENSMUSG00000024966	transcript4160.19.nnic	novel_not_in_catalog	at_least_one_novel_splicesite	826	6	402
Mouse	ENSMUSG00000040102	transcript16991.6.nnic	novel_not_in_catalog	at_least_one_novel_splicesite	1304	2	400
Mouse	ENSMUSG00000035212	transcript7340.4.nnic	novel_not_in_catalog	at_least_one_novel_splicesite	846	4	397
Mouse	ENSMUSG00000047731	transcript10096.19.nnic	novel_not_in_catalog	at_least_one_novel_splicesite	1131	2	397
Mouse	ENSMUSG00000032560	transcript15337.9.nnic	novel_not_in_catalog	at_least_one_novel_splicesite	584	3	394
Mouse	ENSMUSG00000052456	transcript10694.8.nnic	novel_not_in_catalog	at_least_one_novel_splicesite	245	2	392
Mouse	ENSMUSG00000079179	transcript84.12.nnic	novel_not_in_catalog	at_least_one_novel_splicesite	940	2	391
Mouse	ENSMUSG00000016637	transcript6666.15.nnic	novel_not_in_catalog	at_least_one_novel_splicesite	918	6	391
Mouse	ENSMUSG00000022314	transcript3036.15.nnic	novel_not_in_catalog	at_least_one_novel_splicesite	862	2	388
Mouse	ENSMUSG00000027884	transcript12837.3.nnic	novel_not_in_catalog	at_least_one_novel_splicesite	2097	12	387
Mouse	ENSMUSG00000005354	transcript6469.15.nnic	novel_not_in_catalog	intron_retention	1410	4	383
Mouse	ENSMUSG00000029455	transcript12957.5.nnic	novel_not_in_catalog	at_least_one_novel_splicesite	232	2	381
Mouse	ENSMUSG00000038489	transcript29475.7.nnic	novel_not_in_catalog	at_least_one_novel_splicesite	946	3	381
Mouse	ENSMUSG00000074781	transcript12440.10.nnic	novel_not_in_catalog	at_least_one_novel_splicesite	1655	4	381
Mouse	ENSMUSG00000048497	transcript9920.11.nnic	novel_not_in_catalog	at_least_one_novel_splicesite	1361	3	381
Mouse	ENSMUSG00000096768	transcript222.Y.nnic	novel_not_in_catalog	intron_retention	1030	4	381
Mouse	ENSMUSG00000004096	transcript512.9.nnic	novel_not_in_catalog	at_least_one_novel_splicesite	1174	7	380
Mouse	ENSMUSG00000001054	transcript6335.11.nnic	novel_not_in_catalog	at_least_one_novel_splicesite	2001	10	379
Mouse	ENSMUSG00000024350	transcript2719.18.nnic	novel_not_in_catalog	at_least_one_novel_splicesite	2143	2	379
Mouse	ENSMUSG00000044018	transcript4644.4.nnic	novel_not_in_catalog	at_least_one_novel_splicesite	754	3	378
Mouse	ENSMUSG00000030980	transcript23555.7.nnic	novel_not_in_catalog	at_least_one_novel_splicesite	1604	2	378
Mouse	ENSMUSG00000028907	transcript11621.4.nnic	novel_not_in_catalog	at_least_one_novel_splicesite	1055	9	377
Mouse	ENSMUSG00000002052	transcript15441.11.nnic	novel_not_in_catalog	at_least_one_novel_splicesite	575	4	377
Mouse	ENSMUSG00000030615	transcript18191.7.nnic	novel_not_in_catalog	at_least_one_novel_splicesite	919	5	374
Mouse	ENSMUSG00000042185	transcript3161.9.nnic	novel_not_in_catalog	at_least_one_novel_splicesite	2299	4	374
Mouse	ENSMUSG00000040415	transcript14652.10.nnic	novel_not_in_catalog	at_least_one_novel_splicesite	465	3	373
Mouse	ENSMUSG00000025213	transcript9446.19.nnic	novel_not_in_catalog	at_least_one_novel_splicesite	904	4	371
Mouse	ENSMUSG00000046722	transcript9692.3.nnic	novel_not_in_catalog	at_least_one_novel_splicesite	1295	5	370
Mouse	ENSMUSG00000032477	transcript17472.9.nnic	novel_not_in_catalog	at_least_one_novel_splicesite	637	2	369
Mouse	ENSMUSG00000026043	transcript3234.1.nnic	novel_not_in_catalog	at_least_one_novel_splicesite	743	2	368
Mouse	ENSMUSG00000048920	transcript3349.7.nnic	novel_not_in_catalog	at_least_one_novel_splicesite	839	3	367
Mouse	ENSMUSG00000019817	transcript930.10.nnic	novel_not_in_catalog	at_least_one_novel_splicesite	635	2	367
Mouse	ENSMUSG00000040842	transcript17759.4.nnic	novel_not_in_catalog	at_least_one_novel_splicesite	1110	4	366
Mouse	ENSMUSG00000030663	transcript23080.7.nnic	novel_not_in_catalog	at_least_one_novel_splicesite	738	5	365
Mouse	ENSMUSG00000036461	transcript10396.14.nnic	novel_not_in_catalog	at_least_one_novel_splicesite	2194	2	364
Mouse	ENSMUSG00000001127	transcript1459.X.nnic	novel_not_in_catalog	at_least_one_novel_splicesite	306	2	361
Mouse	ENSMUSG00000023019	transcript12595.15.nnic	novel_not_in_catalog	at_least_one_novel_splicesite	677	5	360
Mouse	ENSMUSG00000041483	transcript13451.1.nnic	novel_not_in_catalog	at_least_one_novel_splicesite	1768	2	359
Mouse	ENSMUSG00000043909	transcript15157.2.nnic	novel_not_in_catalog	at_least_one_novel_splicesite	838	5	357
Mouse	ENSMUSG00000003199	transcript14709.17.nnic	novel_not_in_catalog	at_least_one_novel_splicesite	430	2	357
Mouse	ENSMUSG00000008200	transcript11009.2.nnic	novel_not_in_catalog	at_least_one_novel_splicesite	676	2	356
Mouse	ENSMUSG00000014856	transcript13054.8.nnic	novel_not_in_catalog	intron_retention	1212	5	356
Mouse	ENSMUSG00000030802	transcript26421.7.nnic	novel_not_in_catalog	at_least_one_novel_splicesite	1765	12	354
Mouse	ENSMUSG00000029757	transcript508.6.nnic	novel_not_in_catalog	at_least_one_novel_splicesite	1122	4	353
Mouse	ENSMUSG00000032571	transcript15424.9.nnic	novel_not_in_catalog	at_least_one_novel_splicesite	1174	6	353
Mouse	ENSMUSG00000032547	transcript15148.9.nnic	novel_not_in_catalog	at_least_one_novel_splicesite	688	2	350
Mouse	ENSMUSG00000028532	transcript7264.4.nnic	novel_not_in_catalog	at_least_one_novel_splicesite	831	2	348
Mouse	ENSMUSG00000015013	transcript16783.8.nnic	novel_not_in_catalog	at_least_one_novel_splicesite	691	5	348
Mouse	ENSMUSG00000037361	transcript292.12.nnic	novel_not_in_catalog	at_least_one_novel_splicesite	815	4	347
Mouse	ENSMUSG00000056598	transcript9020.11.nnic	novel_not_in_catalog	at_least_one_novel_splicesite	753	3	346
Mouse	ENSMUSG00000025978	transcript3879.1.nnic	novel_not_in_catalog	at_least_one_novel_splicesite	1641	8	345
Mouse	ENSMUSG00000038074	transcript5367.6.nnic	novel_not_in_catalog	at_least_one_novel_splicesite	861	2	344
Mouse	ENSMUSG00000003226	transcript4250.10.nnic	novel_not_in_catalog	at_least_one_novel_splicesite	2625	10	344
Mouse	ENSMUSG00000020706	transcript24299.11.nnic	novel_not_in_catalog	intron_retention	1372	4	344
Mouse	ENSMUSG00000054863	transcript10144.15.nnic	novel_not_in_catalog	at_least_one_novel_splicesite	1245	3	343
Mouse	ENSMUSG00000038372	transcript1860.13.nnic	novel_not_in_catalog	at_least_one_novel_splicesite	816	3	342
Mouse	ENSMUSG00000039361	transcript18138.7.nnic	novel_not_in_catalog	at_least_one_novel_splicesite	994	2	340
Mouse	ENSMUSG00000000378	transcript1510.11.nnic	novel_not_in_catalog	at_least_one_novel_splicesite	1659	9	340
Mouse	ENSMUSG00000024537	transcript6301.18.nnic	novel_not_in_catalog	at_least_one_novel_splicesite	508	3	340
Mouse	ENSMUSG00000021759	transcript11537.13.nnic	novel_not_in_catalog	at_least_one_novel_splicesite	1484	5	338
Mouse	ENSMUSG00000025178	transcript8922.19.nnic	novel_not_in_catalog	at_least_one_novel_splicesite	691	3	338
Mouse	ENSMUSG00000086316	transcript9600.X.nnic	novel_not_in_catalog	at_least_one_novel_splicesite	792	3	337
Mouse	ENSMUSG00000045973	transcript4111.4.nnic	novel_not_in_catalog	at_least_one_novel_splicesite	1053	3	336
Mouse	ENSMUSG00000002679	transcript6852.12.nnic	novel_not_in_catalog	at_least_one_novel_splicesite	1127	9	336
Mouse	ENSMUSG00000021555	transcript6432.13.nnic	novel_not_in_catalog	at_least_one_novel_splicesite	1365	6	336
Mouse	ENSMUSG00000037266	transcript15757.4.nnic	novel_not_in_catalog	intron_retention	1311	3	333
Mouse	ENSMUSG00000029730	transcript18384.5.nnic	novel_not_in_catalog	at_least_one_novel_splicesite	2647	15	333
Mouse	ENSMUSG00000018286	transcript13019.11.nnic	novel_not_in_catalog	at_least_one_novel_splicesite	193	2	333
Mouse	ENSMUSG00000028822	transcript15673.4.nnic	novel_not_in_catalog	at_least_one_novel_splicesite	244	2	332
Mouse	ENSMUSG00000037235	transcript3840.5.nnic	novel_not_in_catalog	at_least_one_novel_splicesite	419	2	331
Mouse	ENSMUSG00000024953	transcript3702.19.nnic	novel_not_in_catalog	at_least_one_novel_splicesite	352	2	330
Mouse	ENSMUSG00000070385	transcript11376.3.nnic	novel_not_in_catalog	at_least_one_novel_splicesite	741	4	328
Mouse	ENSMUSG00000062901	transcript3054.16.nnic	novel_not_in_catalog	at_least_one_novel_splicesite	2062	2	328
Mouse	ENSMUSG00000018648	transcript16684.11.nnic	novel_not_in_catalog	at_least_one_novel_splicesite	1453	3	326
Mouse	ENSMUSG00000033799	transcript49.13.nnic	novel_not_in_catalog	at_least_one_novel_splicesite	2213	7	326
Mouse	ENSMUSG00000028969	transcript1484.5.nnic	novel_not_in_catalog	intron_retention	1295	11	325
Mouse	ENSMUSG00000045100	transcript10240.6.nnic	novel_not_in_catalog	at_least_one_novel_splicesite	1168	2	325
Mouse	ENSMUSG00000031661	transcript11319.8.nnic	novel_not_in_catalog	at_least_one_novel_splicesite	1171	5	325
Mouse	ENSMUSG00000030074	transcript10614.6.nnic	novel_not_in_catalog	at_least_one_novel_splicesite	993	3	324
Mouse	ENSMUSG00000020297	transcript3625.11.nnic	novel_not_in_catalog	at_least_one_novel_splicesite	370	2	324
Mouse	ENSMUSG00000018774	transcript11544.11.nnic	novel_not_in_catalog	at_least_one_novel_splicesite	819	5	324
Mouse	ENSMUSG00000001576	transcript5139.17.nnic	novel_not_in_catalog	at_least_one_novel_splicesite	995	2	324
Mouse	ENSMUSG00000020537	transcript9059.11.nnic	novel_not_in_catalog	at_least_one_novel_splicesite	1067	7	323
Mouse	ENSMUSG00000027655	transcript22657.2.nnic	novel_not_in_catalog	at_least_one_novel_splicesite	1667	5	322
Mouse	ENSMUSG00000038991	transcript3111.13.nnic	novel_not_in_catalog	at_least_one_novel_splicesite	772	2	322
Mouse	ENSMUSG00000027488	transcript20427.2.nnic	novel_not_in_catalog	at_least_one_novel_splicesite	1035	4	321
Mouse	ENSMUSG00000032215	transcript11823.9.nnic	novel_not_in_catalog	at_least_one_novel_splicesite	821	3	321
Mouse	ENSMUSG00000028797	transcript13654.4.nnic	novel_not_in_catalog	at_least_one_novel_splicesite	407	2	320
Mouse	ENSMUSG00000046834	transcript13274.15.nnic	novel_not_in_catalog	at_least_one_novel_splicesite	755	2	320
Mouse	ENSMUSG00000042644	transcript5509.17.nnic	novel_not_in_catalog	at_least_one_novel_splicesite	1323	5	320
Mouse	ENSMUSG00000027430	transcript18799.2.nnic	novel_not_in_catalog	at_least_one_novel_splicesite	864	3	319
Mouse	ENSMUSG00000028199	transcript16798.3.nnic	novel_not_in_catalog	at_least_one_novel_splicesite	2506	9	319
Mouse	ENSMUSG00000002205	transcript11606.7.nnic	novel_not_in_catalog	at_least_one_novel_splicesite	616	3	319
Mouse	ENSMUSG00000003037	transcript7974.8.nnic	novel_not_in_catalog	at_least_one_novel_splicesite	1538	9	319
Mouse	ENSMUSG00000041482	transcript5720.18.nnic	novel_not_in_catalog	at_least_one_novel_splicesite	789	2	319
Mouse	ENSMUSG00000045257	transcript17576.17.nnic	novel_not_in_catalog	at_least_one_novel_splicesite	1011	5	315
Mouse	ENSMUSG00000033323	transcript7609.18.nnic	novel_not_in_catalog	at_least_one_novel_splicesite	1295	4	315
Mouse	ENSMUSG00000006699	transcript16486.4.nnic	novel_not_in_catalog	at_least_one_novel_splicesite	1029	6	314
Mouse	ENSMUSG00000020149	transcript2297.11.nnic	novel_not_in_catalog	at_least_one_novel_splicesite	1625	6	313
Mouse	ENSMUSG00000037679	transcript11312.12.nnic	novel_not_in_catalog	at_least_one_novel_splicesite	829	2	311
Mouse	ENSMUSG00000024785	transcript7469.19.nnic	novel_not_in_catalog	at_least_one_novel_splicesite	821	2	310
Mouse	ENSMUSG00000051391	transcript17004.5.nnic	novel_not_in_catalog	at_least_one_novel_splicesite	1202	2	309
Mouse	ENSMUSG00000030247	transcript16585.6.nnic	novel_not_in_catalog	at_least_one_novel_splicesite	1686	4	308
Mouse	ENSMUSG00000001127	transcript1389.X.nnic	novel_not_in_catalog	at_least_one_novel_splicesite	983	7	308
Mouse	ENSMUSG00000029814	transcript4538.6.nnic	novel_not_in_catalog	at_least_one_novel_splicesite	1628	8	307
Mouse	ENSMUSG00000043061	transcript2072.12.nnic	novel_not_in_catalog	at_least_one_novel_splicesite	1010	5	307
Mouse	ENSMUSG00000021993	transcript7706.14.nnic	novel_not_in_catalog	at_least_one_novel_splicesite	673	5	307
Mouse	ENSMUSG00000032121	transcript3629.9.nnic	novel_not_in_catalog	at_least_one_novel_splicesite	1042	4	306
Mouse	ENSMUSG00000042606	transcript25429.7.nnic	novel_not_in_catalog	at_least_one_novel_splicesite	1408	3	304
Mouse	ENSMUSG00000034620	transcript14139.10.nnic	novel_not_in_catalog	at_least_one_novel_splicesite	1373	6	304
Mouse	ENSMUSG00000041199	transcript4442.17.nnic	novel_not_in_catalog	at_least_one_novel_splicesite	1556	5	304
Mouse	ENSMUSG00000024811	transcript8179.19.nnic	novel_not_in_catalog	at_least_one_novel_splicesite	1701	2	304
Mouse	ENSMUSG00000002043	transcript4376.7.nnic	novel_not_in_catalog	at_least_one_novel_splicesite	978	6	301
Mouse	ENSMUSG00000023150	transcript13960.1.nnic	novel_not_in_catalog	at_least_one_novel_splicesite	316	2	300
Mouse	ENSMUSG00000011960	transcript11531.15.nnic	novel_not_in_catalog	at_least_one_novel_splicesite	1490	2	300
Mouse	ENSMUSG00000017670	transcript23993.2.nnic	novel_not_in_catalog	at_least_one_novel_splicesite	2402	10	299
Mouse	ENSMUSG00000035275	transcript7273.4.nnic	novel_not_in_catalog	at_least_one_novel_splicesite	2310	4	299
Mouse	ENSMUSG00000005354	transcript6507.15.nnic	novel_not_in_catalog	at_least_one_novel_splicesite	475	3	299
Mouse	ENSMUSG00000008153	transcript13173.6.nnic	novel_not_in_catalog	at_least_one_novel_splicesite	2247	3	296
Mouse	ENSMUSG00000020305	transcript3505.11.nnic	novel_not_in_catalog	at_least_one_novel_splicesite	1828	9	296
Mouse	ENSMUSG00000114436	transcript1422.14.nnic	novel_not_in_catalog	at_least_one_novel_splicesite	390	2	296
Mouse	ENSMUSG00000035765	transcript6969.18.nnic	novel_not_in_catalog	at_least_one_novel_splicesite	473	2	296
Mouse	ENSMUSG00000026374	transcript10972.1.nnic	novel_not_in_catalog	at_least_one_novel_splicesite	598	2	293
Mouse	ENSMUSG00000008348	transcript14897.5.nnic	novel_not_in_catalog	at_least_one_novel_splicesite	1676	2	293
Mouse	ENSMUSG00000031913	transcript14033.8.nnic	novel_not_in_catalog	at_least_one_novel_splicesite	851	4	293
Mouse	ENSMUSG00000056596	transcript15082.4.nnic	novel_not_in_catalog	intron_retention	867	2	292
Mouse	ENSMUSG00000014074	transcript5028.16.nnic	novel_not_in_catalog	at_least_one_novel_splicesite	1166	2	291
Mouse	ENSMUSG00000037710	transcript5723.10.nnic	novel_not_in_catalog	at_least_one_novel_splicesite	766	3	290
Mouse	ENSMUSG00000038402	transcript1812.13.nnic	novel_not_in_catalog	at_least_one_novel_splicesite	1225	2	290
Mouse	ENSMUSG00000036022	transcript2900.X.nnic	novel_not_in_catalog	at_least_one_novel_splicesite	2014	2	290
Mouse	ENSMUSG00000006412	transcript17380.1.nnic	novel_not_in_catalog	at_least_one_novel_splicesite	302	2	289
Mouse	ENSMUSG00000027770	transcript4093.3.nnic	novel_not_in_catalog	at_least_one_novel_splicesite	1826	2	289
Mouse	ENSMUSG00000025159	transcript8844.19.nnic	novel_not_in_catalog	at_least_one_novel_splicesite	620	4	288
Mouse	ENSMUSG00000051391	transcript17006.5.nnic	novel_not_in_catalog	at_least_one_novel_splicesite	902	2	286
Mouse	ENSMUSG00000036598	transcript12335.8.nnic	novel_not_in_catalog	at_least_one_novel_splicesite	589	4	285
Mouse	ENSMUSG00000062054	transcript1403.12.nnic	novel_not_in_catalog	at_least_one_novel_splicesite	925	6	284
Mouse	ENSMUSG00000041035	transcript9579.19.nnic	novel_not_in_catalog	at_least_one_novel_splicesite	625	3	284
Mouse	ENSMUSG00000033423	transcript10140.4.nnic	novel_not_in_catalog	at_least_one_novel_splicesite	1077	7	282
Mouse	ENSMUSG00000030605	transcript16400.7.nnic	novel_not_in_catalog	at_least_one_novel_splicesite	2070	9	282
Mouse	ENSMUSG00000024914	transcript2034.19.nnic	novel_not_in_catalog	at_least_one_novel_splicesite	241	2	282
Mouse	ENSMUSG00000000295	transcript2382.10.nnic	novel_not_in_catalog	at_least_one_novel_splicesite	944	6	280
Mouse	ENSMUSG00000026887	transcript6590.2.nnic	novel_not_in_catalog	at_least_one_novel_splicesite	1323	7	279
Mouse	ENSMUSG00000031864	transcript5476.8.nnic	novel_not_in_catalog	at_least_one_novel_splicesite	541	2	279
Mouse	ENSMUSG00000042487	transcript12004.9.nnic	novel_not_in_catalog	at_least_one_novel_splicesite	413	2	279
Mouse	ENSMUSG00000026034	transcript4259.1.nnic	novel_not_in_catalog	at_least_one_novel_splicesite	1923	6	278
Mouse	ENSMUSG00000057604	transcript10857.6.nnic	novel_not_in_catalog	at_least_one_novel_splicesite	725	4	277
Mouse	ENSMUSG00000028678	transcript9984.4.nnic	novel_not_in_catalog	at_least_one_novel_splicesite	957	2	276
Mouse	ENSMUSG00000021477	transcript7004.13.nnic	novel_not_in_catalog	at_least_one_novel_splicesite	1638	8	276
Mouse	ENSMUSG00000037364	transcript17715.5.nnic	novel_not_in_catalog	at_least_one_novel_splicesite	1663	12	275
Mouse	ENSMUSG00000020766	transcript26594.11.nnic	novel_not_in_catalog	at_least_one_novel_splicesite	547	4	275
Mouse	ENSMUSG00000031924	transcript14132.8.nnic	novel_not_in_catalog	at_least_one_novel_splicesite	681	2	274
Mouse	ENSMUSG00000027498	transcript25054.2.nnic	novel_not_in_catalog	at_least_one_novel_splicesite	1109	2	273
Mouse	ENSMUSG00000101892	transcript3454.15.nnic	novel_not_in_catalog	at_least_one_novel_splicesite	1827	6	273
Mouse	ENSMUSG00000029171	transcript5510.5.nnic	novel_not_in_catalog	at_least_one_novel_splicesite	620	3	272
Mouse	ENSMUSG00000024580	transcript5577.18.nnic	novel_not_in_catalog	at_least_one_novel_splicesite	1532	5	272
Mouse	ENSMUSG00000022090	transcript9039.14.nnic	novel_not_in_catalog	at_least_one_novel_splicesite	837	4	271
Mouse	ENSMUSG00000032589	transcript16563.9.nnic	novel_not_in_catalog	at_least_one_novel_splicesite	825	2	270
Mouse	ENSMUSG00000017707	transcript23008.2.nnic	novel_not_in_catalog	at_least_one_novel_splicesite	1389	2	269
Mouse	ENSMUSG00000054934	transcript13478.10.nnic	novel_not_in_catalog	at_least_one_novel_splicesite	1174	4	269
Mouse	ENSMUSG00000052852	transcript6702.6.nnic	novel_not_in_catalog	at_least_one_novel_splicesite	1881	2	267
Mouse	ENSMUSG00000002968	transcript11928.7.nnic	novel_not_in_catalog	at_least_one_novel_splicesite	1366	11	267
Mouse	ENSMUSG00000031840	transcript6904.8.nnic	novel_not_in_catalog	at_least_one_novel_splicesite	585	3	267
Mouse	ENSMUSG00000033032	transcript5582.18.nnic	novel_not_in_catalog	at_least_one_novel_splicesite	1718	5	267
Mouse	ENSMUSG00000036578	transcript9870.7.nnic	novel_not_in_catalog	at_least_one_novel_splicesite	892	6	264
Mouse	ENSMUSG00000045107	transcript1434.14.nnic	novel_not_in_catalog	at_least_one_novel_splicesite	1132	2	264
Mouse	ENSMUSG00000029723	transcript18232.5.nnic	novel_not_in_catalog	at_least_one_novel_splicesite	541	2	262
Mouse	ENSMUSG00000012422	transcript9121.13.nnic	novel_not_in_catalog	at_least_one_novel_splicesite	651	3	262
Mouse	ENSMUSG00000068601	transcript3295.6.nnic	novel_not_in_catalog	at_least_one_novel_splicesite	834	3	261
Mouse	ENSMUSG00000032216	transcript11690.9.nnic	novel_not_in_catalog	at_least_one_novel_splicesite	1931	2	261
Mouse	ENSMUSG00000012443	transcript8268.19.nnic	novel_not_in_catalog	at_least_one_novel_splicesite	1116	2	260
Mouse	ENSMUSG00000011257	transcript11379.4.nnic	novel_not_in_catalog	at_least_one_novel_splicesite	757	3	259
Mouse	ENSMUSG00000038034	transcript17713.1.nnic	novel_not_in_catalog	at_least_one_novel_splicesite	540	3	257
Mouse	ENSMUSG00000035139	transcript4574.13.nnic	novel_not_in_catalog	at_least_one_novel_splicesite	1261	3	257
Mouse	ENSMUSG00000024135	transcript18170.17.nnic	novel_not_in_catalog	at_least_one_novel_splicesite	1162	3	257
Mouse	ENSMUSG00000050373	transcript23812.2.nnic	novel_not_in_catalog	at_least_one_novel_splicesite	1077	4	256
Mouse	ENSMUSG00000069020	transcript4384.2.nnic	novel_not_in_catalog	at_least_one_novel_splicesite	474	2	255
Mouse	ENSMUSG00000028899	transcript14350.4.nnic	novel_not_in_catalog	at_least_one_novel_splicesite	1441	7	255
Mouse	ENSMUSG00000020219	transcript9215.10.nnic	novel_not_in_catalog	at_least_one_novel_splicesite	1088	3	255
Mouse	ENSMUSG00000026347	transcript11504.1.nnic	novel_not_in_catalog	at_least_one_novel_splicesite	1493	8	254
Mouse	ENSMUSG00000030101	transcript10756.6.nnic	novel_not_in_catalog	at_least_one_novel_splicesite	566	2	254
Mouse	ENSMUSG00000061723	transcript30141.7.nnic	novel_not_in_catalog	at_least_one_novel_splicesite	1086	13	254
Mouse	ENSMUSG00000005469	transcript9674.8.nnic	novel_not_in_catalog	at_least_one_novel_splicesite	748	4	254
Mouse	ENSMUSG00000033955	transcript10708.2.nnic	novel_not_in_catalog	at_least_one_novel_splicesite	2262	7	251
Mouse	ENSMUSG00000021670	transcript9757.13.nnic	novel_not_in_catalog	at_least_one_novel_splicesite	562	2	251
Mouse	ENSMUSG00000045639	transcript26193.7.nnic	novel_not_in_catalog	at_least_one_novel_splicesite	739	3	249
Mouse	ENSMUSG00000032553	transcript15168.9.nnic	novel_not_in_catalog	at_least_one_novel_splicesite	1912	8	248
Mouse	ENSMUSG00000058655	transcript13436.15.nnic	novel_not_in_catalog	at_least_one_novel_splicesite	2020	15	248
Mouse	ENSMUSG00000073293	transcript22.X.nnic	novel_not_in_catalog	at_least_one_novel_splicesite	970	3	248
Mouse	ENSMUSG00000028890	transcript11782.4.nnic	novel_not_in_catalog	at_least_one_novel_splicesite	625	2	247
Mouse	ENSMUSG00000034602	transcript14194.10.nnic	novel_not_in_catalog	at_least_one_novel_splicesite	1846	5	246
Mouse	ENSMUSG00000110332	transcript11388.8.nnic	novel_not_in_catalog	at_least_one_novel_splicesite	988	2	243
Mouse	ENSMUSG00000020808	transcript13610.11.nnic	novel_not_in_catalog	at_least_one_novel_splicesite	1131	6	241
Mouse	ENSMUSG00000022338	transcript2782.15.nnic	novel_not_in_catalog	at_least_one_novel_splicesite	1277	5	241
Mouse	ENSMUSG00000026187	transcript6474.1.nnic	novel_not_in_catalog	at_least_one_novel_splicesite	418	3	240
Mouse	ENSMUSG00000041774	transcript2136.16.nnic	novel_not_in_catalog	intron_retention	1276	3	240
Mouse	ENSMUSG00000069833	transcript5416.19.nnic	novel_not_in_catalog	at_least_one_novel_splicesite	1018	2	240
Mouse	ENSMUSG00000021037	transcript8188.12.nnic	novel_not_in_catalog	at_least_one_novel_splicesite	416	2	239
Mouse	ENSMUSG00000024535	transcript4717.18.nnic	novel_not_in_catalog	intron_retention	1911	7	239
Mouse	ENSMUSG00000036206	transcript9045.1.nnic	novel_not_in_catalog	at_least_one_novel_splicesite	2261	3	237
Mouse	ENSMUSG00000066735	transcript15776.5.nnic	novel_not_in_catalog	at_least_one_novel_splicesite	1201	2	236
Mouse	ENSMUSG00000071655	transcript5218.19.nnic	novel_not_in_catalog	at_least_one_novel_splicesite	394	3	236
Mouse	ENSMUSG00000011158	transcript11499.12.nnic	novel_not_in_catalog	at_least_one_novel_splicesite	652	4	235
Mouse	ENSMUSG00000021550	transcript6288.13.nnic	novel_not_in_catalog	at_least_one_novel_splicesite	598	3	234
Mouse	ENSMUSG00000090066	transcript15248.3.nnic	novel_not_in_catalog	at_least_one_novel_splicesite	1535	3	233
Mouse	ENSMUSG00000028821	transcript15732.4.nnic	novel_not_in_catalog	at_least_one_novel_splicesite	912	6	232
Mouse	ENSMUSG00000015542	transcript25514.11.nnic	novel_not_in_catalog	at_least_one_novel_splicesite	1074	5	232
Mouse	ENSMUSG00000029823	transcript3167.6.nnic	novel_not_in_catalog	at_least_one_novel_splicesite	1856	8	231
Mouse	ENSMUSG00000053519	transcript4664.11.nnic	novel_not_in_catalog	at_least_one_novel_splicesite	1635	8	231
Mouse	ENSMUSG00000016664	transcript9475.15.nnic	novel_not_in_catalog	at_least_one_novel_splicesite	421	2	231
Mouse	ENSMUSG00000000420	transcript1318.18.nnic	novel_not_in_catalog	at_least_one_novel_splicesite	756	2	230
Mouse	ENSMUSG00000075307	transcript8522.2.nnic	novel_not_in_catalog	at_least_one_novel_splicesite	2371	7	229
Mouse	ENSMUSG00000041975	transcript8980.2.nnic	novel_not_in_catalog	at_least_one_novel_splicesite	1445	4	228
Mouse	ENSMUSG00000031918	transcript455.9.nnic	novel_not_in_catalog	at_least_one_novel_splicesite	1700	2	228
Mouse	ENSMUSG00000035557	transcript21470.11.nnic	novel_not_in_catalog	at_least_one_novel_splicesite	341	2	228
Mouse	ENSMUSG00000021417	transcript2775.13.nnic	novel_not_in_catalog	at_least_one_novel_splicesite	306	2	228
Mouse	ENSMUSG00000096768	transcript101.Y.nnic	novel_not_in_catalog	intron_retention	1009	5	228
Mouse	ENSMUSG00000027555	transcript1064.3.nnic	novel_not_in_catalog	at_least_one_novel_splicesite	411	2	226
Mouse	ENSMUSG00000024544	transcript6386.18.nnic	novel_not_in_catalog	at_least_one_novel_splicesite	1008	4	226
Mouse	ENSMUSG00000055407	transcript19090.7.nnic	novel_not_in_catalog	at_least_one_novel_splicesite	1494	2	225
Mouse	ENSMUSG00000038255	transcript20307.11.nnic	novel_not_in_catalog	at_least_one_novel_splicesite	358	2	225
Mouse	ENSMUSG00000027227	transcript15969.2.nnic	novel_not_in_catalog	at_least_one_novel_splicesite	1076	2	224
Mouse	ENSMUSG00000020375	transcript6118.11.nnic	novel_not_in_catalog	at_least_one_novel_splicesite	1130	4	224
Mouse	ENSMUSG00000015804	transcript5037.5.nnic	novel_not_in_catalog	at_least_one_novel_splicesite	930	5	223
Mouse	ENSMUSG00000020828	transcript12950.11.nnic	novel_not_in_catalog	at_least_one_novel_splicesite	1330	4	223
Mouse	ENSMUSG00000017132	transcript27866.11.nnic	novel_not_in_catalog	at_least_one_novel_splicesite	715	2	223
Mouse	ENSMUSG00000033728	transcript6161.15.nnic	novel_not_in_catalog	at_least_one_novel_splicesite	1692	3	223
Mouse	ENSMUSG00000021714	transcript10911.13.nnic	novel_not_in_catalog	at_least_one_novel_splicesite	1085	10	222
Mouse	ENSMUSG00000069763	transcript17921.11.nnic	novel_not_in_catalog	at_least_one_novel_splicesite	1755	3	221
Mouse	ENSMUSG00000060572	transcript17536.4.nnic	novel_not_in_catalog	at_least_one_novel_splicesite	1165	9	220
Mouse	ENSMUSG00000030161	transcript15490.6.nnic	novel_not_in_catalog	at_least_one_novel_splicesite	714	2	220
Mouse	ENSMUSG00000027937	transcript7991.3.nnic	novel_not_in_catalog	at_least_one_novel_splicesite	1210	5	219
Mouse	ENSMUSG00000028420	transcript4808.4.nnic	novel_not_in_catalog	at_least_one_novel_splicesite	1290	5	218
Mouse	ENSMUSG00000056204	transcript6723.8.nnic	novel_not_in_catalog	at_least_one_novel_splicesite	1620	5	216
Mouse	ENSMUSG00000000632	transcript15490.11.nnic	novel_not_in_catalog	at_least_one_novel_splicesite	790	2	216
Mouse	ENSMUSG00000059326	transcript11575.19.nnic	novel_not_in_catalog	intron_retention	1558	7	216
Mouse	ENSMUSG00000026459	transcript12368.1.nnic	novel_not_in_catalog	at_least_one_novel_splicesite	616	2	215
Mouse	ENSMUSG00000034586	transcript25581.11.nnic	novel_not_in_catalog	at_least_one_novel_splicesite	592	2	215
Mouse	ENSMUSG00000025066	transcript10467.19.nnic	novel_not_in_catalog	at_least_one_novel_splicesite	1569	4	215
Mouse	ENSMUSG00000028969	transcript1451.5.nnic	novel_not_in_catalog	at_least_one_novel_splicesite	1186	12	214
Mouse	ENSMUSG00000026526	transcript18022.1.nnic	novel_not_in_catalog	at_least_one_novel_splicesite	1480	9	213
Mouse	ENSMUSG00000035781	transcript7747.10.nnic	novel_not_in_catalog	at_least_one_novel_splicesite	800	7	213
Mouse	ENSMUSG00000054733	transcript8241.14.nnic	novel_not_in_catalog	at_least_one_novel_splicesite	1269	4	213
Mouse	ENSMUSG00000050668	transcript17268.17.nnic	novel_not_in_catalog	at_least_one_novel_splicesite	2015	2	213
Mouse	ENSMUSG00000046573	transcript2817.13.nnic	novel_not_in_catalog	at_least_one_novel_splicesite	1005	3	212
Mouse	ENSMUSG00000060969	transcript7661.13.nnic	novel_not_in_catalog	at_least_one_novel_splicesite	1341	3	212
Mouse	ENSMUSG00000022814	transcript5292.16.nnic	novel_not_in_catalog	at_least_one_novel_splicesite	965	4	212
Mouse	ENSMUSG00000027852	transcript11277.3.nnic	novel_not_in_catalog	at_least_one_novel_splicesite	697	5	211
Mouse	ENSMUSG00000040913	transcript9559.19.nnic	novel_not_in_catalog	at_least_one_novel_splicesite	1160	5	210
Mouse	ENSMUSG00000019802	transcript3370.10.nnic	novel_not_in_catalog	at_least_one_novel_splicesite	377	2	209
Mouse	ENSMUSG00000021991	transcript2610.14.nnic	novel_not_in_catalog	at_least_one_novel_splicesite	1628	4	208
Mouse	ENSMUSG00000030842	transcript20135.7.nnic	novel_not_in_catalog	at_least_one_novel_splicesite	602	3	207
Mouse	ENSMUSG00000014873	transcript3689.2.nnic	novel_not_in_catalog	intron_retention	1378	5	206
Mouse	ENSMUSG00000063651	transcript5642.7.nnic	novel_not_in_catalog	at_least_one_novel_splicesite	752	5	204
Mouse	ENSMUSG00000050965	transcript24754.11.nnic	novel_not_in_catalog	at_least_one_novel_splicesite	1821	2	204
Mouse	ENSMUSG00000034211	transcript15370.5.nnic	novel_not_in_catalog	at_least_one_novel_splicesite	891	4	203
Mouse	ENSMUSG00000040236	transcript204.8.nnic	novel_not_in_catalog	at_least_one_novel_splicesite	677	3	203
Mouse	ENSMUSG00000021756	transcript11500.13.nnic	novel_not_in_catalog	at_least_one_novel_splicesite	850	2	203
Mouse	ENSMUSG00000087150	transcript15325.6.nnic	novel_not_in_catalog	at_least_one_novel_splicesite	899	3	201
Mouse	ENSMUSG00000045333	transcript11224.8.nnic	novel_not_in_catalog	at_least_one_novel_splicesite	981	4	200
Mouse	ENSMUSG00000018042	transcript9427.15.nnic	novel_not_in_catalog	at_least_one_novel_splicesite	412	3	200
Mouse	ENSMUSG00000039770	transcript16751.17.nnic	novel_not_in_catalog	at_least_one_novel_splicesite	1039	4	200
Mouse	ENSMUSG00000031242	transcript6856.X.nnic	novel_not_in_catalog	at_least_one_novel_splicesite	1312	8	200
Mouse	ENSMUSG00000029554	transcript19113.5.nnic	novel_not_in_catalog	at_least_one_novel_splicesite	848	2	199
Mouse	ENSMUSG00000034936	transcript22723.11.nnic	novel_not_in_catalog	at_least_one_novel_splicesite	1199	2	199
Mouse	ENSMUSG00000036450	transcript9300.19.nnic	novel_not_in_catalog	at_least_one_novel_splicesite	1679	9	199
Mouse	ENSMUSG00000045251	transcript26227.7.nnic	novel_not_in_catalog	at_least_one_novel_splicesite	1078	2	198
Mouse	ENSMUSG00000031104	transcript2553.X.nnic	novel_not_in_catalog	at_least_one_novel_splicesite	742	2	198
Mouse	ENSMUSG00000042750	transcript7693.X.nnic	novel_not_in_catalog	at_least_one_novel_splicesite	583	4	198
Mouse	ENSMUSG00000026459	transcript12355.1.nnic	novel_not_in_catalog	at_least_one_novel_splicesite	1648	3	197
Mouse	ENSMUSG00000047423	transcript2027.19.nnic	novel_not_in_catalog	at_least_one_novel_splicesite	560	2	197
Mouse	ENSMUSG00000026209	transcript7452.1.nnic	novel_not_in_catalog	at_least_one_novel_splicesite	438	2	196
Mouse	ENSMUSG00000010136	transcript11952.3.nnic	novel_not_in_catalog	at_least_one_novel_splicesite	828	5	196
Mouse	ENSMUSG00000030811	transcript26273.7.nnic	novel_not_in_catalog	at_least_one_novel_splicesite	1908	5	196
Mouse	ENSMUSG00000034321	transcript8822.19.nnic	novel_not_in_catalog	at_least_one_novel_splicesite	896	5	196
Mouse	ENSMUSG00000021932	transcript7892.14.nnic	novel_not_in_catalog	at_least_one_novel_splicesite	1086	11	195
Mouse	ENSMUSG00000096199	transcript194.12.nnic	novel_not_in_catalog	at_least_one_novel_splicesite	671	2	194
Mouse	ENSMUSG00000035268	transcript23061.2.nnic	novel_not_in_catalog	at_least_one_novel_splicesite	1572	4	193
Mouse	ENSMUSG00000086854	transcript2031.6.nnic	novel_not_in_catalog	at_least_one_novel_splicesite	1731	2	193
Mouse	ENSMUSG00000029838	transcript2741.6.nnic	novel_not_in_catalog	at_least_one_novel_splicesite	1632	6	192
Mouse	ENSMUSG00000031785	transcript12137.8.nnic	novel_not_in_catalog	at_least_one_novel_splicesite	1060	4	192
Mouse	ENSMUSG00000038121	transcript6428.18.nnic	novel_not_in_catalog	at_least_one_novel_splicesite	1210	2	192
Mouse	ENSMUSG00000028651	transcript11301.4.nnic	novel_not_in_catalog	at_least_one_novel_splicesite	1260	10	191
Mouse	ENSMUSG00000033379	transcript10261.4.nnic	novel_not_in_catalog	at_least_one_novel_splicesite	1053	8	187
Mouse	ENSMUSG00000024400	transcript1605.18.nnic	novel_not_in_catalog	at_least_one_novel_splicesite	1208	6	187
Mouse	ENSMUSG00000024590	transcript5035.18.nnic	novel_not_in_catalog	at_least_one_novel_splicesite	430	2	187
Mouse	ENSMUSG00000006476	transcript2187.2.nnic	novel_not_in_catalog	at_least_one_novel_splicesite	672	4	186
Mouse	ENSMUSG00000031837	transcript15625.8.nnic	novel_not_in_catalog	at_least_one_novel_splicesite	1496	6	186
Mouse	ENSMUSG00000028636	transcript11012.4.nnic	novel_not_in_catalog	at_least_one_novel_splicesite	1202	3	185
Mouse	ENSMUSG00000084786	transcript974.9.nnic	novel_not_in_catalog	at_least_one_novel_splicesite	596	6	184
Mouse	ENSMUSG00000039640	transcript28619.11.nnic	novel_not_in_catalog	at_least_one_novel_splicesite	432	3	184
Mouse	ENSMUSG00000026433	transcript11919.1.nnic	novel_not_in_catalog	intron_retention	1386	5	183
Mouse	ENSMUSG00000027499	transcript105.3.nnic	novel_not_in_catalog	at_least_one_novel_splicesite	1138	2	183
Mouse	ENSMUSG00000060671	transcript7638.3.nnic	novel_not_in_catalog	at_least_one_novel_splicesite	868	2	183
Mouse	ENSMUSG00000073838	transcript24646.7.nnic	novel_not_in_catalog	at_least_one_novel_splicesite	676	3	181
Mouse	ENSMUSG00000031641	transcript5216.8.nnic	novel_not_in_catalog	at_least_one_novel_splicesite	992	4	181
Mouse	ENSMUSG00000069237	transcript3943.13.nnic	novel_not_in_catalog	at_least_one_novel_splicesite	1134	2	181
Mouse	ENSMUSG00000024472	transcript4155.18.nnic	novel_not_in_catalog	at_least_one_novel_splicesite	954	2	181
Mouse	ENSMUSG00000026970	transcript8067.2.nnic	novel_not_in_catalog	at_least_one_novel_splicesite	630	2	180
Mouse	ENSMUSG00000037325	transcript2460.3.nnic	novel_not_in_catalog	at_least_one_novel_splicesite	1246	8	180
Mouse	ENSMUSG00000029127	transcript4645.5.nnic	novel_not_in_catalog	at_least_one_novel_splicesite	1721	6	180
Mouse	ENSMUSG00000035285	transcript1246.7.nnic	novel_not_in_catalog	at_least_one_novel_splicesite	1285	3	179
Mouse	ENSMUSG00000032002	transcript209.9.nnic	novel_not_in_catalog	at_least_one_novel_splicesite	1147	8	179
Mouse	ENSMUSG00000029776	transcript5212.6.nnic	novel_not_in_catalog	at_least_one_novel_splicesite	714	5	177
Mouse	ENSMUSG00000020315	transcript3371.11.nnic	novel_not_in_catalog	at_least_one_novel_splicesite	1343	2	177
Mouse	ENSMUSG00000042873	transcript10998.6.nnic	novel_not_in_catalog	at_least_one_novel_splicesite	1147	2	176
Mouse	ENSMUSG00000002031	transcript4712.9.nnic	novel_not_in_catalog	at_least_one_novel_splicesite	1611	12	176
Mouse	ENSMUSG00000019795	transcript358.10.nnic	novel_not_in_catalog	at_least_one_novel_splicesite	1178	8	176
Mouse	ENSMUSG00000061950	transcript15997.17.nnic	novel_not_in_catalog	at_least_one_novel_splicesite	1197	2	176
Mouse	ENSMUSG00000023367	transcript4336.6.nnic	novel_not_in_catalog	at_least_one_novel_splicesite	1226	7	175
Mouse	ENSMUSG00000026088	transcript2072.1.nnic	novel_not_in_catalog	at_least_one_novel_splicesite	1211	7	174
Mouse	ENSMUSG00000039199	transcript13302.8.nnic	novel_not_in_catalog	at_least_one_novel_splicesite	859	4	174
Mouse	ENSMUSG00000032338	transcript7911.9.nnic	novel_not_in_catalog	at_least_one_novel_splicesite	1619	2	174
Mouse	ENSMUSG00000020248	transcript10686.10.nnic	novel_not_in_catalog	at_least_one_novel_splicesite	593	3	174
Mouse	ENSMUSG00000026473	transcript14292.1.nnic	novel_not_in_catalog	at_least_one_novel_splicesite	901	5	172
Mouse	ENSMUSG00000021494	transcript5842.13.nnic	novel_not_in_catalog	at_least_one_novel_splicesite	332	2	172
Mouse	ENSMUSG00000031246	transcript6990.X.nnic	novel_not_in_catalog	at_least_one_novel_splicesite	557	2	172
Mouse	ENSMUSG00000031600	transcript3888.8.nnic	novel_not_in_catalog	at_least_one_novel_splicesite	1236	4	171
Mouse	ENSMUSG00000034845	transcript7692.8.nnic	novel_not_in_catalog	at_least_one_novel_splicesite	1050	4	171
Mouse	ENSMUSG00000040699	transcript24150.11.nnic	novel_not_in_catalog	at_least_one_novel_splicesite	1833	2	171
Mouse	ENSMUSG00000054302	transcript3454.12.nnic	novel_not_in_catalog	at_least_one_novel_splicesite	1291	6	171
Mouse	ENSMUSG00000035653	transcript4181.12.nnic	novel_not_in_catalog	at_least_one_novel_splicesite	579	3	171
Mouse	ENSMUSG00000022401	transcript8485.15.nnic	novel_not_in_catalog	at_least_one_novel_splicesite	1041	2	171
Mouse	ENSMUSG00000001383	transcript3310.18.nnic	novel_not_in_catalog	at_least_one_novel_splicesite	479	5	171
Mouse	ENSMUSG00000024350	transcript2723.18.nnic	novel_not_in_catalog	at_least_one_novel_splicesite	422	2	170
Mouse	ENSMUSG00000063802	transcript956.7.nnic	novel_not_in_catalog	at_least_one_novel_splicesite	1440	8	169
Mouse	ENSMUSG00000024165	transcript3842.17.nnic	novel_not_in_catalog	at_least_one_novel_splicesite	890	6	169
Mouse	ENSMUSG00000032388	transcript9836.9.nnic	novel_not_in_catalog	at_least_one_novel_splicesite	1975	9	168
Mouse	ENSMUSG00000032301	transcript6726.9.nnic	novel_not_in_catalog	at_least_one_novel_splicesite	1266	10	167
Mouse	ENSMUSG00000032575	transcript15964.9.nnic	novel_not_in_catalog	at_least_one_novel_splicesite	365	3	167
Mouse	ENSMUSG00000018417	transcript3407.1.nnic	novel_not_in_catalog	intron_retention	1404	3	166
Mouse	ENSMUSG00000045193	transcript8300.10.nnic	novel_not_in_catalog	at_least_one_novel_splicesite	535	2	166
Mouse	ENSMUSG00000018569	transcript12392.11.nnic	novel_not_in_catalog	at_least_one_novel_splicesite	659	4	165
Mouse	ENSMUSG00000021242	transcript7486.12.nnic	novel_not_in_catalog	at_least_one_novel_splicesite	1193	2	165
Mouse	ENSMUSG00000050931	transcript14514.3.nnic	novel_not_in_catalog	at_least_one_novel_splicesite	1793	6	164
Mouse	ENSMUSG00000019817	transcript898.10.nnic	novel_not_in_catalog	at_least_one_novel_splicesite	770	2	164
Mouse	ENSMUSG00000031820	transcript7302.8.nnic	novel_not_in_catalog	at_least_one_novel_splicesite	1260	9	163
Mouse	ENSMUSG00000018401	transcript17537.11.nnic	novel_not_in_catalog	at_least_one_novel_splicesite	2191	4	163
Mouse	ENSMUSG00000024381	transcript1740.18.nnic	novel_not_in_catalog	at_least_one_novel_splicesite	2048	15	163
Mouse	ENSMUSG00000097867	transcript4219.16.nnic	novel_not_in_catalog	at_least_one_novel_splicesite	859	2	162
Mouse	ENSMUSG00000035049	transcript8728.19.nnic	novel_not_in_catalog	at_least_one_novel_splicesite	750	4	162
Mouse	ENSMUSG00000027495	transcript25005.2.nnic	novel_not_in_catalog	at_least_one_novel_splicesite	1066	4	161
Mouse	ENSMUSG00000068921	transcript6772.3.nnic	novel_not_in_catalog	at_least_one_novel_splicesite	1605	13	161
Mouse	ENSMUSG00000019817	transcript820.10.nnic	novel_not_in_catalog	at_least_one_novel_splicesite	1046	2	161
Mouse	ENSMUSG00000015889	transcript12006.10.nnic	novel_not_in_catalog	at_least_one_novel_splicesite	1990	18	161
Mouse	ENSMUSG00000022095	transcript9251.14.nnic	novel_not_in_catalog	at_least_one_novel_splicesite	1312	2	161
Mouse	ENSMUSG00000030725	transcript19372.7.nnic	novel_not_in_catalog	at_least_one_novel_splicesite	818	3	160
Mouse	ENSMUSG00000041012	transcript18167.9.nnic	novel_not_in_catalog	at_least_one_novel_splicesite	919	4	160
Mouse	ENSMUSG00000064215	transcript9331.12.nnic	novel_not_in_catalog	at_least_one_novel_splicesite	1087	7	160
Mouse	ENSMUSG00000042050	transcript11921.12.nnic	novel_not_in_catalog	at_least_one_novel_splicesite	2080	5	160
Mouse	ENSMUSG00000026575	transcript16103.1.nnic	novel_not_in_catalog	at_least_one_novel_splicesite	795	6	159
Mouse	ENSMUSG00000042992	transcript15715.6.nnic	novel_not_in_catalog	at_least_one_novel_splicesite	1583	3	159
Mouse	ENSMUSG00000034848	transcript8386.2.nnic	novel_not_in_catalog	at_least_one_novel_splicesite	560	2	158
Mouse	ENSMUSG00000031924	transcript14013.8.nnic	novel_not_in_catalog	at_least_one_novel_splicesite	751	5	158
Mouse	ENSMUSG00000033420	transcript9134.6.nnic	novel_not_in_catalog	at_least_one_novel_splicesite	897	2	157
Mouse	ENSMUSG00000031529	transcript3598.8.nnic	novel_not_in_catalog	at_least_one_novel_splicesite	1031	2	157
Mouse	ENSMUSG00000030534	transcript16922.7.nnic	novel_not_in_catalog	at_least_one_novel_splicesite	1077	5	156
Mouse	ENSMUSG00000007944	transcript6564.7.nnic	novel_not_in_catalog	at_least_one_novel_splicesite	657	3	155
Mouse	ENSMUSG00000055707	transcript6460.8.nnic	novel_not_in_catalog	at_least_one_novel_splicesite	1073	2	155
Mouse	ENSMUSG00000028470	transcript3523.4.nnic	novel_not_in_catalog	at_least_one_novel_splicesite	856	5	154
Mouse	ENSMUSG00000021179	transcript8749.12.nnic	novel_not_in_catalog	at_least_one_novel_splicesite	704	4	153
Mouse	ENSMUSG00000021420	transcript2870.13.nnic	novel_not_in_catalog	at_least_one_novel_splicesite	454	2	152
Mouse	ENSMUSG00000022382	transcript9974.15.nnic	novel_not_in_catalog	at_least_one_novel_splicesite	920	2	152
Mouse	ENSMUSG00000041035	transcript9531.19.nnic	novel_not_in_catalog	at_least_one_novel_splicesite	954	7	152
Mouse	ENSMUSG00000030161	transcript15452.6.nnic	novel_not_in_catalog	at_least_one_novel_splicesite	1095	5	151
Mouse	ENSMUSG00000030707	transcript24829.7.nnic	novel_not_in_catalog	at_least_one_novel_splicesite	917	7	150
Mouse	ENSMUSG00000031513	transcript3519.8.nnic	novel_not_in_catalog	at_least_one_novel_splicesite	980	4	150
Mouse	ENSMUSG00000029038	transcript20757.4.nnic	novel_not_in_catalog	at_least_one_novel_splicesite	963	5	149
Mouse	ENSMUSG00000032109	transcript4410.9.nnic	novel_not_in_catalog	at_least_one_novel_splicesite	1175	3	149
Mouse	ENSMUSG00000022136	transcript11350.14.nnic	novel_not_in_catalog	at_least_one_novel_splicesite	558	5	149
Mouse	ENSMUSG00000038319	transcript1424.5.nnic	novel_not_in_catalog	at_least_one_novel_splicesite	1494	4	148
Mouse	ENSMUSG00000051978	transcript1279.8.nnic	novel_not_in_catalog	at_least_one_novel_splicesite	1654	6	148
Mouse	ENSMUSG00000021143	transcript11554.12.nnic	novel_not_in_catalog	at_least_one_novel_splicesite	739	2	148
Mouse	ENSMUSG00000015747	transcript10294.3.nnic	novel_not_in_catalog	at_least_one_novel_splicesite	447	2	147
Mouse	ENSMUSG00000057375	transcript8087.4.nnic	novel_not_in_catalog	at_least_one_novel_splicesite	325	2	147
Mouse	ENSMUSG00000032553	transcript15224.9.nnic	novel_not_in_catalog	at_least_one_novel_splicesite	1108	2	147
Mouse	ENSMUSG00000025410	transcript14824.10.nnic	novel_not_in_catalog	at_least_one_novel_splicesite	552	2	147
Mouse	ENSMUSG00000021094	transcript5464.12.nnic	novel_not_in_catalog	at_least_one_novel_splicesite	782	4	147
Mouse	ENSMUSG00000020956	transcript3256.12.nnic	novel_not_in_catalog	at_least_one_novel_splicesite	1381	3	145
Mouse	ENSMUSG00000035521	transcript3941.17.nnic	novel_not_in_catalog	at_least_one_novel_splicesite	1234	11	145
Mouse	ENSMUSG00000048402	transcript11028.1.nnic	novel_not_in_catalog	at_least_one_novel_splicesite	215	2	144
Mouse	ENSMUSG00000028618	transcript7798.4.nnic	novel_not_in_catalog	at_least_one_novel_splicesite	1841	8	144
Mouse	ENSMUSG00000047945	transcript13141.4.nnic	novel_not_in_catalog	at_least_one_novel_splicesite	1189	2	144
Mouse	ENSMUSG00000078429	transcript14281.10.nnic	novel_not_in_catalog	at_least_one_novel_splicesite	2196	2	144
Mouse	ENSMUSG00000022010	transcript10051.14.nnic	novel_not_in_catalog	at_least_one_novel_splicesite	926	2	144
Mouse	ENSMUSG00000059923	transcript26270.11.nnic	novel_not_in_catalog	at_least_one_novel_splicesite	920	4	143
Mouse	ENSMUSG00000023039	transcript13081.15.nnic	novel_not_in_catalog	at_least_one_novel_splicesite	490	3	143
Mouse	ENSMUSG00000040565	transcript8232.19.nnic	novel_not_in_catalog	at_least_one_novel_splicesite	1180	2	143
Mouse	ENSMUSG00000054387	transcript12062.1.nnic	novel_not_in_catalog	at_least_one_novel_splicesite	453	2	142
Mouse	ENSMUSG00000026494	transcript18396.1.nnic	novel_not_in_catalog	at_least_one_novel_splicesite	2201	4	140
Mouse	ENSMUSG00000026787	transcript1885.2.nnic	novel_not_in_catalog	at_least_one_novel_splicesite	1407	4	140
Mouse	ENSMUSG00000003948	transcript17935.11.nnic	novel_not_in_catalog	at_least_one_novel_splicesite	1103	2	140
Mouse	ENSMUSG00000038372	transcript1838.13.nnic	novel_not_in_catalog	at_least_one_novel_splicesite	1277	8	140
Mouse	ENSMUSG00000024772	transcript3353.19.nnic	novel_not_in_catalog	at_least_one_novel_splicesite	1227	2	140
Mouse	ENSMUSG00000069769	transcript17780.11.nnic	novel_not_in_catalog	at_least_one_novel_splicesite	1494	2	139
Mouse	ENSMUSG00000071528	transcript10205.19.nnic	novel_not_in_catalog	at_least_one_novel_splicesite	521	5	139
Mouse	ENSMUSG00000026036	transcript4326.1.nnic	novel_not_in_catalog	at_least_one_novel_splicesite	763	4	138
Mouse	ENSMUSG00000059552	transcript11402.11.nnic	novel_not_in_catalog	at_least_one_novel_splicesite	2189	12	138
Mouse	ENSMUSG00000034601	transcript5192.12.nnic	novel_not_in_catalog	at_least_one_novel_splicesite	428	2	138
Mouse	ENSMUSG00000079428	transcript8019.X.nnic	novel_not_in_catalog	at_least_one_novel_splicesite	1187	4	138
Mouse	ENSMUSG00000014748	transcript8193.6.nnic	novel_not_in_catalog	at_least_one_novel_splicesite	1181	6	137
Mouse	ENSMUSG00000030996	transcript20233.7.nnic	novel_not_in_catalog	at_least_one_novel_splicesite	797	5	137
Mouse	ENSMUSG00000051483	transcript9741.16.nnic	novel_not_in_catalog	at_least_one_novel_splicesite	1068	3	137
Mouse	ENSMUSG00000027227	transcript15964.2.nnic	novel_not_in_catalog	at_least_one_novel_splicesite	409	2	136
Mouse	ENSMUSG00000027763	transcript3982.3.nnic	novel_not_in_catalog	at_least_one_novel_splicesite	2339	2	136
Mouse	ENSMUSG00000025104	transcript17541.7.nnic	novel_not_in_catalog	at_least_one_novel_splicesite	1074	2	136
Mouse	ENSMUSG00000037461	transcript19785.1.nnic	novel_not_in_catalog	at_least_one_novel_splicesite	237	2	134
Mouse	ENSMUSG00000033423	transcript10169.4.nnic	novel_not_in_catalog	at_least_one_novel_splicesite	927	4	134
Mouse	ENSMUSG00000002957	transcript29565.7.nnic	novel_not_in_catalog	at_least_one_novel_splicesite	1240	2	134
Mouse	ENSMUSG00000059277	transcript31745.7.nnic	novel_not_in_catalog	at_least_one_novel_splicesite	699	4	134
Mouse	ENSMUSG00000037851	transcript4435.13.nnic	novel_not_in_catalog	at_least_one_novel_splicesite	897	3	134
Mouse	ENSMUSG00000028563	transcript7042.4.nnic	novel_not_in_catalog	at_least_one_novel_splicesite	1012	6	133
Mouse	ENSMUSG00000052566	transcript10656.8.nnic	novel_not_in_catalog	at_least_one_novel_splicesite	1044	3	133
Mouse	ENSMUSG00000038279	transcript14510.6.nnic	novel_not_in_catalog	at_least_one_novel_splicesite	671	6	132
Mouse	ENSMUSG00000036427	transcript10260.7.nnic	novel_not_in_catalog	at_least_one_novel_splicesite	821	5	132
Mouse	ENSMUSG00000019774	transcript265.10.nnic	novel_not_in_catalog	at_least_one_novel_splicesite	734	3	132
Mouse	ENSMUSG00000001119	transcript6551.10.nnic	novel_not_in_catalog	at_least_one_novel_splicesite	1253	2	132
Mouse	ENSMUSG00000027455	transcript19356.2.nnic	novel_not_in_catalog	at_least_one_novel_splicesite	2227	7	131
Mouse	ENSMUSG00000060260	transcript27916.7.nnic	novel_not_in_catalog	at_least_one_novel_splicesite	857	2	131
Mouse	ENSMUSG00000021748	transcript405.14.nnic	novel_not_in_catalog	at_least_one_novel_splicesite	946	2	131
Mouse	ENSMUSG00000022211	transcript6488.14.nnic	novel_not_in_catalog	at_least_one_novel_splicesite	499	2	131
Mouse	ENSMUSG00000022816	transcript6074.16.nnic	novel_not_in_catalog	at_least_one_novel_splicesite	1025	2	131
Mouse	ENSMUSG00000024083	transcript15875.17.nnic	novel_not_in_catalog	at_least_one_novel_splicesite	1256	6	131
Mouse	ENSMUSG00000005683	transcript16202.10.nnic	novel_not_in_catalog	at_least_one_novel_splicesite	1395	2	130
Mouse	ENSMUSG00000042569	transcript9133.11.nnic	novel_not_in_catalog	at_least_one_novel_splicesite	1345	7	130
Mouse	ENSMUSG00000034064	transcript6350.16.nnic	novel_not_in_catalog	at_least_one_novel_splicesite	1111	2	130
Mouse	ENSMUSG00000057863	transcript15292.17.nnic	novel_not_in_catalog	at_least_one_novel_splicesite	800	5	130
Mouse	ENSMUSG00000017721	transcript23345.2.nnic	novel_not_in_catalog	at_least_one_novel_splicesite	839	2	129
Mouse	ENSMUSG00000018411	transcript23638.11.nnic	novel_not_in_catalog	at_least_one_novel_splicesite	1486	9	129
Mouse	ENSMUSG00000031575	transcript2609.8.nnic	novel_not_in_catalog	at_least_one_novel_splicesite	790	4	128
Mouse	ENSMUSG00000021514	transcript7118.13.nnic	novel_not_in_catalog	at_least_one_novel_splicesite	804	4	128
Mouse	ENSMUSG00000021773	transcript2027.14.nnic	novel_not_in_catalog	at_least_one_novel_splicesite	1079	7	127
Mouse	ENSMUSG00000037621	transcript6782.6.nnic	novel_not_in_catalog	at_least_one_novel_splicesite	1047	2	126
Mouse	ENSMUSG00000051669	transcript788.16.nnic	novel_not_in_catalog	at_least_one_novel_splicesite	1210	7	126
Mouse	ENSMUSG00000031311	transcript5770.X.nnic	novel_not_in_catalog	at_least_one_novel_splicesite	932	5	126
Mouse	ENSMUSG00000048222	transcript15789.2.nnic	novel_not_in_catalog	at_least_one_novel_splicesite	328	2	125
Mouse	ENSMUSG00000019210	transcript12579.6.nnic	novel_not_in_catalog	at_least_one_novel_splicesite	1336	10	124
Mouse	ENSMUSG00000014633	transcript15346.8.nnic	novel_not_in_catalog	at_least_one_novel_splicesite	381	3	124
Mouse	ENSMUSG00000089726	transcript11191.14.nnic	novel_not_in_catalog	at_least_one_novel_splicesite	1353	2	124
Mouse	ENSMUSG00000027890	transcript12521.3.nnic	novel_not_in_catalog	at_least_one_novel_splicesite	1498	8	123
Mouse	ENSMUSG00000021248	transcript7687.12.nnic	novel_not_in_catalog	at_least_one_novel_splicesite	1613	5	123
Mouse	ENSMUSG00000025969	transcript5279.1.nnic	novel_not_in_catalog	at_least_one_novel_splicesite	323	2	122
Mouse	ENSMUSG00000036873	transcript15958.3.nnic	novel_not_in_catalog	at_least_one_novel_splicesite	669	2	122
Mouse	ENSMUSG00000044617	transcript15078.10.nnic	novel_not_in_catalog	at_least_one_novel_splicesite	805	2	122
Mouse	ENSMUSG00000056851	transcript13797.15.nnic	novel_not_in_catalog	at_least_one_novel_splicesite	889	6	122
Mouse	ENSMUSG00000078247	transcript1265.17.nnic	novel_not_in_catalog	at_least_one_novel_splicesite	775	3	122
Mouse	ENSMUSG00000028461	transcript3359.4.nnic	novel_not_in_catalog	intron_retention	903	5	121
Mouse	ENSMUSG00000024268	transcript1494.18.nnic	novel_not_in_catalog	at_least_one_novel_splicesite	657	2	121
Mouse	ENSMUSG00000058709	transcript6120.7.nnic	novel_not_in_catalog	at_least_one_novel_splicesite	1725	6	120
Mouse	ENSMUSG00000031534	transcript1807.8.nnic	novel_not_in_catalog	at_least_one_novel_splicesite	496	2	120
Mouse	ENSMUSG00000019794	transcript438.10.nnic	novel_not_in_catalog	at_least_one_novel_splicesite	1789	11	120
Mouse	ENSMUSG00000062906	transcript10364.15.nnic	novel_not_in_catalog	intron_retention	746	4	120
Mouse	ENSMUSG00000060992	transcript14601.15.nnic	novel_not_in_catalog	at_least_one_novel_splicesite	1934	10	120
Mouse	ENSMUSG00000024940	transcript2818.19.nnic	novel_not_in_catalog	at_least_one_novel_splicesite	339	2	120
Mouse	ENSMUSG00000015749	transcript10199.3.nnic	novel_not_in_catalog	at_least_one_novel_splicesite	905	4	119
Mouse	ENSMUSG00000001604	transcript16307.4.nnic	novel_not_in_catalog	at_least_one_novel_splicesite	460	4	119
Mouse	ENSMUSG00000045031	transcript2518.3.nnic	novel_not_in_catalog	at_least_one_novel_splicesite	1100	3	118
Mouse	ENSMUSG00000029521	transcript10389.5.nnic	novel_not_in_catalog	at_least_one_novel_splicesite	957	3	118
Mouse	ENSMUSG00000023345	transcript15567.9.nnic	novel_not_in_catalog	at_least_one_novel_splicesite	377	2	118
Mouse	ENSMUSG00000018548	transcript17433.11.nnic	novel_not_in_catalog	at_least_one_novel_splicesite	465	3	118
Mouse	ENSMUSG00000022324	transcript1629.15.nnic	novel_not_in_catalog	at_least_one_novel_splicesite	1206	6	118
Mouse	ENSMUSG00000028426	transcript4897.4.nnic	novel_not_in_catalog	at_least_one_novel_splicesite	736	2	117
Mouse	ENSMUSG00000042978	transcript24499.7.nnic	novel_not_in_catalog	at_least_one_novel_splicesite	1298	2	117
Mouse	ENSMUSG00000030678	transcript25732.7.nnic	novel_not_in_catalog	at_least_one_novel_splicesite	561	2	117
Mouse	ENSMUSG00000015461	transcript9006.17.nnic	novel_not_in_catalog	at_least_one_novel_splicesite	295	2	117
Mouse	ENSMUSG00000071037	transcript18046.17.nnic	novel_not_in_catalog	at_least_one_novel_splicesite	1029	6	117
Mouse	ENSMUSG00000040562	transcript12478.3.nnic	novel_not_in_catalog	at_least_one_novel_splicesite	446	3	116
Mouse	ENSMUSG00000025144	transcript29859.11.nnic	novel_not_in_catalog	at_least_one_novel_splicesite	199	2	116
Mouse	ENSMUSG00000069020	transcript4329.2.nnic	novel_not_in_catalog	at_least_one_novel_splicesite	1386	5	115
Mouse	ENSMUSG00000028790	transcript13740.4.nnic	novel_not_in_catalog	at_least_one_novel_splicesite	1028	2	115
Mouse	ENSMUSG00000029001	transcript18718.4.nnic	novel_not_in_catalog	at_least_one_novel_splicesite	1672	5	115
Mouse	ENSMUSG00000022225	transcript7137.14.nnic	novel_not_in_catalog	at_least_one_novel_splicesite	1240	6	115
Mouse	ENSMUSG00000024943	transcript6782.19.nnic	novel_not_in_catalog	at_least_one_novel_splicesite	1735	7	115
Mouse	ENSMUSG00000037062	transcript15764.3.nnic	novel_not_in_catalog	at_least_one_novel_splicesite	1370	10	114
Mouse	ENSMUSG00000017493	transcript20771.11.nnic	novel_not_in_catalog	at_least_one_novel_splicesite	1090	2	114
Mouse	ENSMUSG00000022579	transcript4822.15.nnic	novel_not_in_catalog	at_least_one_novel_splicesite	904	4	114
Mouse	ENSMUSG00000022748	transcript7567.16.nnic	novel_not_in_catalog	at_least_one_novel_splicesite	596	3	114
Mouse	ENSMUSG00000036299	transcript6891.18.nnic	novel_not_in_catalog	at_least_one_novel_splicesite	932	3	114
Mouse	ENSMUSG00000026678	transcript16654.1.nnic	novel_not_in_catalog	at_least_one_novel_splicesite	681	2	113
Mouse	ENSMUSG00000041417	transcript10713.13.nnic	novel_not_in_catalog	at_least_one_novel_splicesite	645	2	113
Mouse	ENSMUSG00000038077	transcript14851.6.nnic	novel_not_in_catalog	at_least_one_novel_splicesite	483	2	112
Mouse	ENSMUSG00000044021	transcript10845.15.nnic	novel_not_in_catalog	at_least_one_novel_splicesite	1034	10	112
Mouse	ENSMUSG00000024891	transcript1542.19.nnic	novel_not_in_catalog	at_least_one_novel_splicesite	2768	12	112
Mouse	ENSMUSG00000030032	transcript7816.6.nnic	novel_not_in_catalog	at_least_one_novel_splicesite	1229	11	111
Mouse	ENSMUSG00000041323	transcript9676.12.nnic	novel_not_in_catalog	at_least_one_novel_splicesite	1554	6	111
Mouse	ENSMUSG00000022336	transcript2609.15.nnic	novel_not_in_catalog	at_least_one_novel_splicesite	1583	13	111
Mouse	ENSMUSG00000071172	transcript6371.17.nnic	novel_not_in_catalog	at_least_one_novel_splicesite	986	3	111
Mouse	ENSMUSG00000025809	transcript18698.8.nnic	novel_not_in_catalog	at_least_one_novel_splicesite	480	2	110
Mouse	ENSMUSG00000028546	transcript8755.4.nnic	novel_not_in_catalog	at_least_one_novel_splicesite	1400	7	109
Mouse	ENSMUSG00000038188	transcript14254.11.nnic	novel_not_in_catalog	at_least_one_novel_splicesite	1985	7	109
Mouse	ENSMUSG00000051223	transcript4367.1.nnic	novel_not_in_catalog	at_least_one_novel_splicesite	1087	2	108
Mouse	ENSMUSG00000028780	transcript760.5.nnic	novel_not_in_catalog	at_least_one_novel_splicesite	1720	2	108
Mouse	ENSMUSG00000029762	transcript2426.6.nnic	novel_not_in_catalog	at_least_one_novel_splicesite	1371	9	108
Mouse	ENSMUSG00000025743	transcript14139.4.nnic	novel_not_in_catalog	at_least_one_novel_splicesite	1118	2	107
Mouse	ENSMUSG00000021846	transcript4880.14.nnic	novel_not_in_catalog	at_least_one_novel_splicesite	1523	2	107
Mouse	ENSMUSG00000022223	transcript7085.14.nnic	novel_not_in_catalog	intron_retention	1496	5	107
Mouse	ENSMUSG00000023066	transcript7967.18.nnic	novel_not_in_catalog	at_least_one_novel_splicesite	1455	3	107
Mouse	ENSMUSG00000000184	transcript15028.6.nnic	novel_not_in_catalog	at_least_one_novel_splicesite	574	3	106
Mouse	ENSMUSG00000014837	transcript12945.8.nnic	novel_not_in_catalog	at_least_one_novel_splicesite	349	2	106
Mouse	ENSMUSG00000078861	transcript25997.2.nnic	novel_not_in_catalog	at_least_one_novel_splicesite	802	4	105
Mouse	ENSMUSG00000030148	transcript13105.6.nnic	novel_not_in_catalog	at_least_one_novel_splicesite	1225	5	105
Mouse	ENSMUSG00000053226	transcript10138.8.nnic	novel_not_in_catalog	at_least_one_novel_splicesite	1244	2	105
Mouse	ENSMUSG00000062380	transcript17620.8.nnic	novel_not_in_catalog	at_least_one_novel_splicesite	462	2	105
Mouse	ENSMUSG00000071757	transcript3422.15.nnic	novel_not_in_catalog	at_least_one_novel_splicesite	1074	2	105
Mouse	ENSMUSG00000028552	transcript8683.4.nnic	novel_not_in_catalog	at_least_one_novel_splicesite	945	6	104
Mouse	ENSMUSG00000002396	transcript7418.8.nnic	novel_not_in_catalog	at_least_one_novel_splicesite	370	3	104
Mouse	ENSMUSG00000039828	transcript314.15.nnic	novel_not_in_catalog	at_least_one_novel_splicesite	1712	4	104
Mouse	ENSMUSG00000094936	transcript1311.19.nnic	novel_not_in_catalog	at_least_one_novel_splicesite	1176	2	104
Mouse	ENSMUSG00000028167	transcript14799.3.nnic	novel_not_in_catalog	at_least_one_novel_splicesite	678	4	103
Mouse	ENSMUSG00000033220	transcript6780.15.nnic	novel_not_in_catalog	at_least_one_novel_splicesite	948	7	103
Mouse	ENSMUSG00000062169	transcript18815.1.nnic	novel_not_in_catalog	at_least_one_novel_splicesite	721	5	102
Mouse	ENSMUSG00000061689	transcript21505.2.nnic	novel_not_in_catalog	at_least_one_novel_splicesite	700	2	102
Mouse	ENSMUSG00000027834	transcript4699.3.nnic	novel_not_in_catalog	at_least_one_novel_splicesite	1598	9	102
Mouse	ENSMUSG00000035027	transcript9450.10.nnic	novel_not_in_catalog	at_least_one_novel_splicesite	386	3	102
Mouse	ENSMUSG00000060579	transcript750.14.nnic	novel_not_in_catalog	at_least_one_novel_splicesite	490	3	102
Mouse	ENSMUSG00000024421	transcript776.18.nnic	novel_not_in_catalog	at_least_one_novel_splicesite	1643	9	102
Mouse	ENSMUSG00000024677	transcript6196.19.nnic	novel_not_in_catalog	at_least_one_novel_splicesite	1464	7	102
Mouse	ENSMUSG00000026202	transcript7340.1.nnic	novel_not_in_catalog	at_least_one_novel_splicesite	1045	5	101
Mouse	ENSMUSG00000037994	transcript14828.3.nnic	novel_not_in_catalog	at_least_one_novel_splicesite	1373	3	101
Mouse	ENSMUSG00000065990	transcript20952.4.nnic	novel_not_in_catalog	at_least_one_novel_splicesite	1177	4	101
Mouse	ENSMUSG00000058056	transcript5219.8.nnic	novel_not_in_catalog	at_least_one_novel_splicesite	729	4	101
Mouse	ENSMUSG00000015597	transcript13301.17.nnic	novel_not_in_catalog	at_least_one_novel_splicesite	2030	5	101
Mouse	ENSMUSG00000026725	transcript14803.1.nnic	novel_not_in_catalog	at_least_one_novel_splicesite	857	2	100
Mouse	ENSMUSG00000031748	transcript11711.8.nnic	novel_not_in_catalog	at_least_one_novel_splicesite	1543	2	100
Mouse	ENSMUSG00000027244	transcript11525.2.nnic	novel_not_in_catalog	at_least_one_novel_splicesite	356	2	99
Mouse	ENSMUSG00000035559	transcript6883.8.nnic	novel_not_in_catalog	at_least_one_novel_splicesite	939	5	99
Mouse	ENSMUSG00000021285	transcript11135.12.nnic	novel_not_in_catalog	at_least_one_novel_splicesite	2334	6	99
Mouse	ENSMUSG00000022307	transcript2576.15.nnic	novel_not_in_catalog	at_least_one_novel_splicesite	1579	2	99
Mouse	ENSMUSG00000039953	transcript19167.4.nnic	novel_not_in_catalog	at_least_one_novel_splicesite	789	2	98
Mouse	ENSMUSG00000042978	transcript24505.7.nnic	novel_not_in_catalog	at_least_one_novel_splicesite	1133	2	98
Mouse	ENSMUSG00000079084	transcript406.9.nnic	novel_not_in_catalog	at_least_one_novel_splicesite	1229	3	98
Mouse	ENSMUSG00000021772	transcript1192.14.nnic	novel_not_in_catalog	at_least_one_novel_splicesite	1112	4	98
Mouse	ENSMUSG00000073437	transcript3215.17.nnic	novel_not_in_catalog	at_least_one_novel_splicesite	1902	2	98
Mouse	ENSMUSG00000031157	transcript441.X.nnic	novel_not_in_catalog	at_least_one_novel_splicesite	254	3	98
Mouse	ENSMUSG00000033735	transcript8348.6.nnic	novel_not_in_catalog	at_least_one_novel_splicesite	301	2	97
Mouse	ENSMUSG00000030058	transcript9356.6.nnic	novel_not_in_catalog	at_least_one_novel_splicesite	704	5	97
Mouse	ENSMUSG00000001240	transcript22213.11.nnic	novel_not_in_catalog	at_least_one_novel_splicesite	1061	4	97
Mouse	ENSMUSG00000021280	transcript10791.12.nnic	novel_not_in_catalog	at_least_one_novel_splicesite	771	3	97
Mouse	ENSMUSG00000022464	transcript11290.15.nnic	novel_not_in_catalog	at_least_one_novel_splicesite	713	4	97
Mouse	ENSMUSG00000067889	transcript1223.19.nnic	novel_not_in_catalog	at_least_one_novel_splicesite	539	2	97
Mouse	ENSMUSG00000026484	transcript14017.1.nnic	novel_not_in_catalog	at_least_one_novel_splicesite	865	2	96
Mouse	ENSMUSG00000040451	transcript7631.19.nnic	novel_not_in_catalog	at_least_one_novel_splicesite	791	2	96
Mouse	ENSMUSG00000026478	transcript14184.1.nnic	novel_not_in_catalog	at_least_one_novel_splicesite	656	2	95
Mouse	ENSMUSG00000022261	transcript1552.15.nnic	novel_not_in_catalog	at_least_one_novel_splicesite	1361	5	95
Mouse	ENSMUSG00000041840	transcript7253.18.nnic	novel_not_in_catalog	at_least_one_novel_splicesite	1219	9	95
Mouse	ENSMUSG00000057637	transcript18068.4.nnic	novel_not_in_catalog	at_least_one_novel_splicesite	1522	2	94
Mouse	ENSMUSG00000038398	transcript1201.8.nnic	novel_not_in_catalog	at_least_one_novel_splicesite	558	2	94
Mouse	ENSMUSG00000008035	transcript781.X.nnic	novel_not_in_catalog	at_least_one_novel_splicesite	907	3	94
Mouse	ENSMUSG00000022995	transcript18950.1.nnic	novel_not_in_catalog	at_least_one_novel_splicesite	1940	2	93
Mouse	ENSMUSG00000026634	transcript19645.1.nnic	novel_not_in_catalog	at_least_one_novel_splicesite	1315	2	93
Mouse	ENSMUSG00000028063	transcript6339.3.nnic	novel_not_in_catalog	at_least_one_novel_splicesite	1444	4	93
Mouse	ENSMUSG00000031487	transcript3034.8.nnic	novel_not_in_catalog	at_least_one_novel_splicesite	697	2	93
Mouse	ENSMUSG00000032374	transcript14116.9.nnic	novel_not_in_catalog	at_least_one_novel_splicesite	1473	2	93
Mouse	ENSMUSG00000019189	transcript5144.11.nnic	novel_not_in_catalog	at_least_one_novel_splicesite	662	2	93
Mouse	ENSMUSG00000025025	transcript10685.19.nnic	novel_not_in_catalog	at_least_one_novel_splicesite	1746	2	93
Mouse	ENSMUSG00000026657	transcript181.2.nnic	novel_not_in_catalog	at_least_one_novel_splicesite	380	2	92
Mouse	ENSMUSG00000028797	transcript13587.4.nnic	novel_not_in_catalog	at_least_one_novel_splicesite	656	3	92
Mouse	ENSMUSG00000008348	transcript14699.5.nnic	novel_not_in_catalog	at_least_one_novel_splicesite	1956	3	92
Mouse	ENSMUSG00000038248	transcript3394.10.nnic	novel_not_in_catalog	at_least_one_novel_splicesite	1181	2	92
Mouse	ENSMUSG00000020515	transcript7926.11.nnic	novel_not_in_catalog	at_least_one_novel_splicesite	1253	7	92
Mouse	ENSMUSG00000037989	transcript4189.13.nnic	novel_not_in_catalog	at_least_one_novel_splicesite	359	3	92
Mouse	ENSMUSG00000021745	transcript770.14.nnic	novel_not_in_catalog	at_least_one_novel_splicesite	1149	2	92
Mouse	ENSMUSG00000030982	transcript23553.7.nnic	novel_not_in_catalog	at_least_one_novel_splicesite	386	2	91
Mouse	ENSMUSG00000031226	transcript6461.X.nnic	novel_not_in_catalog	at_least_one_novel_splicesite	750	6	91
Mouse	ENSMUSG00000039795	transcript759.3.nnic	novel_not_in_catalog	at_least_one_novel_splicesite	1374	3	90
Mouse	ENSMUSG00000029486	transcript8204.5.nnic	novel_not_in_catalog	at_least_one_novel_splicesite	1295	9	90
Mouse	ENSMUSG00000015134	transcript15818.7.nnic	novel_not_in_catalog	at_least_one_novel_splicesite	1604	7	90
Mouse	ENSMUSG00000031575	transcript2775.8.nnic	novel_not_in_catalog	at_least_one_novel_splicesite	169	2	90
Mouse	ENSMUSG00000087651	transcript10791.10.nnic	novel_not_in_catalog	at_least_one_novel_splicesite	743	6	90
Mouse	ENSMUSG00000083844	transcript1148.11.nnic	novel_not_in_catalog	at_least_one_novel_splicesite	1389	3	90
Mouse	ENSMUSG00000020422	transcript1693.11.nnic	novel_not_in_catalog	at_least_one_novel_splicesite	738	2	90
Mouse	ENSMUSG00000020526	transcript16895.11.nnic	novel_not_in_catalog	at_least_one_novel_splicesite	1096	5	90
Mouse	ENSMUSG00000020718	transcript24446.11.nnic	novel_not_in_catalog	at_least_one_novel_splicesite	1405	8	90
Mouse	ENSMUSG00000022019	transcript10583.14.nnic	novel_not_in_catalog	at_least_one_novel_splicesite	1301	3	90
Mouse	ENSMUSG00000033157	transcript7019.16.nnic	novel_not_in_catalog	at_least_one_novel_splicesite	1144	6	90
Mouse	ENSMUSG00000024145	transcript18208.17.nnic	novel_not_in_catalog	at_least_one_novel_splicesite	896	6	90
Mouse	ENSMUSG00000045629	transcript5634.18.nnic	novel_not_in_catalog	at_least_one_novel_splicesite	1767	3	90
Mouse	ENSMUSG00000028053	transcript6955.3.nnic	novel_not_in_catalog	at_least_one_novel_splicesite	1248	2	89
Mouse	ENSMUSG00000044338	transcript10778.2.nnic	novel_not_in_catalog	at_least_one_novel_splicesite	1562	2	88
Mouse	ENSMUSG00000002748	transcript16620.5.nnic	novel_not_in_catalog	at_least_one_novel_splicesite	735	2	88
Mouse	ENSMUSG00000056763	transcript495.1.nnic	novel_not_in_catalog	at_least_one_novel_splicesite	746	2	87
Mouse	ENSMUSG00000026273	transcript9860.1.nnic	novel_not_in_catalog	at_least_one_novel_splicesite	727	3	87
Mouse	ENSMUSG00000030435	transcript1441.7.nnic	novel_not_in_catalog	at_least_one_novel_splicesite	583	3	87
Mouse	ENSMUSG00000057982	transcript2680.9.nnic	novel_not_in_catalog	at_least_one_novel_splicesite	1236	2	87
Mouse	ENSMUSG00000030086	transcript9815.6.nnic	novel_not_in_catalog	at_least_one_novel_splicesite	308	2	86
Mouse	ENSMUSG00000031478	transcript1670.8.nnic	novel_not_in_catalog	at_least_one_novel_splicesite	2056	5	86
Mouse	ENSMUSG00000078453	transcript1268.10.nnic	novel_not_in_catalog	at_least_one_novel_splicesite	841	4	86
Mouse	ENSMUSG00000044469	transcript14974.17.nnic	novel_not_in_catalog	at_least_one_novel_splicesite	530	2	86
Mouse	ENSMUSG00000032905	transcript4379.18.nnic	novel_not_in_catalog	at_least_one_novel_splicesite	887	4	86
Mouse	ENSMUSG00000025533	transcript15778.5.nnic	novel_not_in_catalog	at_least_one_novel_splicesite	1025	2	85
Mouse	ENSMUSG00000038836	transcript2532.6.nnic	novel_not_in_catalog	at_least_one_novel_splicesite	1613	4	85
Mouse	ENSMUSG00000024268	transcript1491.18.nnic	novel_not_in_catalog	at_least_one_novel_splicesite	397	2	85
Mouse	ENSMUSG00000062376	transcript10131.19.nnic	novel_not_in_catalog	at_least_one_novel_splicesite	836	5	85
Mouse	ENSMUSG00000029007	transcript18654.4.nnic	novel_not_in_catalog	at_least_one_novel_splicesite	1201	5	84
Mouse	ENSMUSG00000045867	transcript12337.10.nnic	novel_not_in_catalog	at_least_one_novel_splicesite	1229	3	84
Mouse	ENSMUSG00000022217	transcript6586.14.nnic	novel_not_in_catalog	at_least_one_novel_splicesite	937	5	84
Mouse	ENSMUSG00000019579	transcript14873.17.nnic	novel_not_in_catalog	at_least_one_novel_splicesite	1073	7	84
Mouse	ENSMUSG00000073131	transcript3402.X.nnic	novel_not_in_catalog	at_least_one_novel_splicesite	597	4	84
Mouse	ENSMUSG00000028807	transcript13119.4.nnic	novel_not_in_catalog	at_least_one_novel_splicesite	1142	3	83
Mouse	ENSMUSG00000048583	transcript31536.7.nnic	novel_not_in_catalog	at_least_one_novel_splicesite	1221	2	83
Mouse	ENSMUSG00000031548	transcript2155.8.nnic	novel_not_in_catalog	at_least_one_novel_splicesite	1054	4	83
Mouse	ENSMUSG00000087211	transcript16787.11.nnic	novel_not_in_catalog	intron_retention	2378	3	83
Mouse	ENSMUSG00000025134	transcript29313.11.nnic	novel_not_in_catalog	at_least_one_novel_splicesite	1113	5	83
Mouse	ENSMUSG00000037386	transcript2521.15.nnic	novel_not_in_catalog	at_least_one_novel_splicesite	1917	6	83
Mouse	ENSMUSG00000048402	transcript11026.1.nnic	novel_not_in_catalog	at_least_one_novel_splicesite	361	2	82
Mouse	ENSMUSG00000035275	transcript7279.4.nnic	novel_not_in_catalog	at_least_one_novel_splicesite	713	2	82
Mouse	ENSMUSG00000055850	transcript6932.6.nnic	novel_not_in_catalog	at_least_one_novel_splicesite	316	2	82
Mouse	ENSMUSG00000035443	transcript2892.9.nnic	novel_not_in_catalog	at_least_one_novel_splicesite	1021	8	82
Mouse	ENSMUSG00000058655	transcript13520.15.nnic	novel_not_in_catalog	at_least_one_novel_splicesite	414	3	82
Mouse	ENSMUSG00000034165	transcript14006.17.nnic	novel_not_in_catalog	at_least_one_novel_splicesite	946	2	82
Mouse	ENSMUSG00000026510	transcript19033.1.nnic	novel_not_in_catalog	at_least_one_novel_splicesite	2413	7	81
Mouse	ENSMUSG00000026643	transcript19.2.nnic	novel_not_in_catalog	at_least_one_novel_splicesite	1726	12	81
Mouse	ENSMUSG00000027222	transcript11735.2.nnic	novel_not_in_catalog	at_least_one_novel_splicesite	338	3	81
Mouse	ENSMUSG00000027472	transcript19930.2.nnic	novel_not_in_catalog	at_least_one_novel_splicesite	1477	5	81
Mouse	ENSMUSG00000030032	transcript7900.6.nnic	novel_not_in_catalog	at_least_one_novel_splicesite	2128	3	81
Mouse	ENSMUSG00000030051	transcript9175.6.nnic	novel_not_in_catalog	intron_retention	867	3	81
Mouse	ENSMUSG00000014633	transcript15320.8.nnic	novel_not_in_catalog	at_least_one_novel_splicesite	854	5	81
Mouse	ENSMUSG00000024866	transcript331.19.nnic	novel_not_in_catalog	at_least_one_novel_splicesite	1350	8	81
Mouse	ENSMUSG00000060679	transcript2814.1.nnic	novel_not_in_catalog	at_least_one_novel_splicesite	1090	4	80
Mouse	ENSMUSG00000028821	transcript15739.4.nnic	novel_not_in_catalog	at_least_one_novel_splicesite	654	5	80
Mouse	ENSMUSG00000031834	transcript6988.8.nnic	novel_not_in_catalog	at_least_one_novel_splicesite	412	3	80
Mouse	ENSMUSG00000045671	transcript2274.11.nnic	novel_not_in_catalog	at_least_one_novel_splicesite	1033	2	80
Mouse	ENSMUSG00000021662	transcript9851.13.nnic	novel_not_in_catalog	at_least_one_novel_splicesite	449	2	80
Mouse	ENSMUSG00000024213	transcript5682.17.nnic	novel_not_in_catalog	at_least_one_novel_splicesite	1081	5	80
Mouse	ENSMUSG00000004113	transcript2030.2.nnic	novel_not_in_catalog	at_least_one_novel_splicesite	942	2	79
Mouse	ENSMUSG00000030166	transcript12492.6.nnic	novel_not_in_catalog	intron_retention	974	3	79
Mouse	ENSMUSG00000107585	transcript50.7.nnic	novel_not_in_catalog	at_least_one_novel_splicesite	706	2	79
Mouse	ENSMUSG00000057788	transcript6222.8.nnic	novel_not_in_catalog	at_least_one_novel_splicesite	908	9	79
Mouse	ENSMUSG00000062380	transcript17476.8.nnic	novel_not_in_catalog	at_least_one_novel_splicesite	1988	5	79
Mouse	ENSMUSG00000020892	transcript11175.11.nnic	novel_not_in_catalog	at_least_one_novel_splicesite	1263	3	79
Mouse	ENSMUSG00000021902	transcript3334.14.nnic	novel_not_in_catalog	at_least_one_novel_splicesite	786	4	79
Mouse	ENSMUSG00000058655	transcript13491.15.nnic	novel_not_in_catalog	at_least_one_novel_splicesite	610	5	79
Mouse	ENSMUSG00000039568	transcript469.16.nnic	novel_not_in_catalog	at_least_one_novel_splicesite	1602	4	79
Mouse	ENSMUSG00000027163	transcript12349.2.nnic	novel_not_in_catalog	at_least_one_novel_splicesite	384	3	78
Mouse	ENSMUSG00000025607	transcript2160.6.nnic	novel_not_in_catalog	at_least_one_novel_splicesite	1452	2	78
Mouse	ENSMUSG00000029326	transcript8501.5.nnic	novel_not_in_catalog	intron_retention	2118	6	77
Mouse	ENSMUSG00000030245	transcript16474.6.nnic	novel_not_in_catalog	at_least_one_novel_splicesite	824	3	77
Mouse	ENSMUSG00000104861	transcript3025.12.nnic	novel_not_in_catalog	at_least_one_novel_splicesite	842	4	77
Mouse	ENSMUSG00000006024	transcript2879.7.nnic	novel_not_in_catalog	at_least_one_novel_splicesite	432	4	76
Mouse	ENSMUSG00000018819	transcript30543.7.nnic	novel_not_in_catalog	at_least_one_novel_splicesite	1164	9	76
Mouse	ENSMUSG00000031917	transcript14128.8.nnic	novel_not_in_catalog	at_least_one_novel_splicesite	1091	2	76
Mouse	ENSMUSG00000051510	transcript29808.11.nnic	novel_not_in_catalog	at_least_one_novel_splicesite	1613	3	76
Mouse	ENSMUSG00000054855	transcript11608.15.nnic	novel_not_in_catalog	at_least_one_novel_splicesite	1452	4	76
Mouse	ENSMUSG00000061535	transcript4847.5.nnic	novel_not_in_catalog	at_least_one_novel_splicesite	1369	3	75
Mouse	ENSMUSG00000030002	transcript8570.6.nnic	novel_not_in_catalog	at_least_one_novel_splicesite	1277	7	75
Mouse	ENSMUSG00000053719	transcript11123.7.nnic	novel_not_in_catalog	at_least_one_novel_splicesite	805	4	75
Mouse	ENSMUSG00000020610	transcript24872.11.nnic	novel_not_in_catalog	at_least_one_novel_splicesite	1676	8	75
Mouse	ENSMUSG00000021259	transcript9849.12.nnic	novel_not_in_catalog	at_least_one_novel_splicesite	1850	11	75
Mouse	ENSMUSG00000021983	transcript7663.14.nnic	novel_not_in_catalog	at_least_one_novel_splicesite	610	3	75
Mouse	ENSMUSG00000053799	transcript8316.19.nnic	novel_not_in_catalog	at_least_one_novel_splicesite	657	4	75
Mouse	ENSMUSG00000046056	transcript9347.7.nnic	novel_not_in_catalog	at_least_one_novel_splicesite	799	5	74
Mouse	ENSMUSG00000042148	transcript10084.11.nnic	novel_not_in_catalog	at_least_one_novel_splicesite	1274	5	74
Mouse	ENSMUSG00000035984	transcript2183.18.nnic	novel_not_in_catalog	intron_retention	823	3	74
Mouse	ENSMUSG00000074872	transcript16104.2.nnic	novel_not_in_catalog	at_least_one_novel_splicesite	1088	2	73
Mouse	ENSMUSG00000028863	transcript11902.4.nnic	novel_not_in_catalog	at_least_one_novel_splicesite	1492	8	73
Mouse	ENSMUSG00000029723	transcript18177.5.nnic	novel_not_in_catalog	at_least_one_novel_splicesite	1179	4	73
Mouse	ENSMUSG00000036687	transcript19012.5.nnic	novel_not_in_catalog	at_least_one_novel_splicesite	714	2	73
Mouse	ENSMUSG00000025102	transcript17409.7.nnic	novel_not_in_catalog	at_least_one_novel_splicesite	726	5	73
Mouse	ENSMUSG00000004044	transcript21944.11.nnic	novel_not_in_catalog	at_least_one_novel_splicesite	634	2	73
Mouse	ENSMUSG00000016200	transcript19908.1.nnic	novel_not_in_catalog	at_least_one_novel_splicesite	422	3	72
Mouse	ENSMUSG00000044864	transcript2665.3.nnic	novel_not_in_catalog	at_least_one_novel_splicesite	1793	2	72
Mouse	ENSMUSG00000038022	transcript5450.6.nnic	novel_not_in_catalog	at_least_one_novel_splicesite	962	4	72
Mouse	ENSMUSG00000030839	transcript14367.7.nnic	novel_not_in_catalog	at_least_one_novel_splicesite	454	2	72
Mouse	ENSMUSG00000110580	transcript9491.8.nnic	novel_not_in_catalog	at_least_one_novel_splicesite	600	2	72
Mouse	ENSMUSG00000039461	transcript16656.9.nnic	novel_not_in_catalog	at_least_one_novel_splicesite	734	4	72
Mouse	ENSMUSG00000022490	transcript14732.15.nnic	novel_not_in_catalog	at_least_one_novel_splicesite	692	8	72
Mouse	ENSMUSG00000026319	transcript10732.1.nnic	novel_not_in_catalog	at_least_one_novel_splicesite	1301	2	71
Mouse	ENSMUSG00000039865	transcript13553.3.nnic	novel_not_in_catalog	at_least_one_novel_splicesite	1138	4	71
Mouse	ENSMUSG00000052419	transcript1088.6.nnic	novel_not_in_catalog	at_least_one_novel_splicesite	554	3	71
Mouse	ENSMUSG00000032333	transcript7752.9.nnic	novel_not_in_catalog	at_least_one_novel_splicesite	1737	2	71
Mouse	ENSMUSG00000027660	transcript1812.3.nnic	novel_not_in_catalog	at_least_one_novel_splicesite	954	2	70
Mouse	ENSMUSG00000097971	transcript11415.17.nnic	novel_not_in_catalog	at_least_one_novel_splicesite	594	2	70
Mouse	ENSMUSG00000015335	transcript4594.2.nnic	novel_not_in_catalog	at_least_one_novel_splicesite	1223	5	69
Mouse	ENSMUSG00000039740	transcript4428.4.nnic	novel_not_in_catalog	at_least_one_novel_splicesite	774	2	69
Mouse	ENSMUSG00000031954	transcript14801.8.nnic	novel_not_in_catalog	at_least_one_novel_splicesite	1185	7	69
Mouse	ENSMUSG00000032329	transcript7083.9.nnic	novel_not_in_catalog	at_least_one_novel_splicesite	569	2	69
Mouse	ENSMUSG00000000295	transcript2392.10.nnic	novel_not_in_catalog	at_least_one_novel_splicesite	1017	6	69
Mouse	ENSMUSG00000023027	transcript12756.15.nnic	novel_not_in_catalog	at_least_one_novel_splicesite	625	2	69
Mouse	ENSMUSG00000039628	transcript3676.17.nnic	novel_not_in_catalog	at_least_one_novel_splicesite	827	2	69
Mouse	ENSMUSG00000042505	transcript696.6.nnic	novel_not_in_catalog	at_least_one_novel_splicesite	1032	2	68
Mouse	ENSMUSG00000075266	transcript2285.10.nnic	novel_not_in_catalog	at_least_one_novel_splicesite	408	3	68
Mouse	ENSMUSG00000020176	transcript1850.11.nnic	novel_not_in_catalog	at_least_one_novel_splicesite	800	2	68
Mouse	ENSMUSG00000087075	transcript10781.12.nnic	novel_not_in_catalog	at_least_one_novel_splicesite	733	4	68
Mouse	ENSMUSG00000033826	transcript6972.17.nnic	novel_not_in_catalog	at_least_one_novel_splicesite	1489	9	68
Mouse	ENSMUSG00000027859	transcript11153.3.nnic	novel_not_in_catalog	at_least_one_novel_splicesite	1106	3	67
Mouse	ENSMUSG00000047649	transcript4083.7.nnic	novel_not_in_catalog	at_least_one_novel_splicesite	611	3	67
Mouse	ENSMUSG00000034361	transcript11964.8.nnic	novel_not_in_catalog	at_least_one_novel_splicesite	938	3	67
Mouse	ENSMUSG00000032086	transcript5109.9.nnic	novel_not_in_catalog	at_least_one_novel_splicesite	687	2	67
Mouse	ENSMUSG00000043670	transcript9365.10.nnic	novel_not_in_catalog	at_least_one_novel_splicesite	1381	2	67
Mouse	ENSMUSG00000034917	transcript10098.10.nnic	novel_not_in_catalog	at_least_one_novel_splicesite	795	5	67
Mouse	ENSMUSG00000020937	transcript23430.11.nnic	novel_not_in_catalog	at_least_one_novel_splicesite	1643	8	67
Mouse	ENSMUSG00000039828	transcript302.15.nnic	novel_not_in_catalog	at_least_one_novel_splicesite	765	6	67
Mouse	ENSMUSG00000023484	transcript12128.15.nnic	novel_not_in_catalog	at_least_one_novel_splicesite	1260	9	67
Mouse	ENSMUSG00000024350	transcript2604.18.nnic	novel_not_in_catalog	at_least_one_novel_splicesite	1330	9	67
Mouse	ENSMUSG00000055184	transcript11854.1.nnic	novel_not_in_catalog	at_least_one_novel_splicesite	566	4	66
Mouse	ENSMUSG00000009214	transcript3875.2.nnic	novel_not_in_catalog	at_least_one_novel_splicesite	1176	5	66
Mouse	ENSMUSG00000040731	transcript16238.5.nnic	novel_not_in_catalog	at_least_one_novel_splicesite	690	3	66
Mouse	ENSMUSG00000062380	transcript17607.8.nnic	novel_not_in_catalog	at_least_one_novel_splicesite	1075	2	66
Mouse	ENSMUSG00000032119	transcript4424.9.nnic	novel_not_in_catalog	at_least_one_novel_splicesite	778	2	66
Mouse	ENSMUSG00000040936	transcript18994.9.nnic	novel_not_in_catalog	at_least_one_novel_splicesite	782	5	66
Mouse	ENSMUSG00000021194	transcript9205.12.nnic	novel_not_in_catalog	at_least_one_novel_splicesite	784	6	66
Mouse	ENSMUSG00000052276	transcript4305.16.nnic	novel_not_in_catalog	at_least_one_novel_splicesite	681	3	66
Mouse	ENSMUSG00000040681	transcript10162.16.nnic	novel_not_in_catalog	at_least_one_novel_splicesite	1166	7	66
Mouse	ENSMUSG00000024654	transcript5446.19.nnic	novel_not_in_catalog	at_least_one_novel_splicesite	1095	7	66
Mouse	ENSMUSG00000097251	transcript9756.1.nnic	novel_not_in_catalog	at_least_one_novel_splicesite	611	2	65
Mouse	ENSMUSG00000039384	transcript19159.1.nnic	novel_not_in_catalog	at_least_one_novel_splicesite	1048	3	65
Mouse	ENSMUSG00000034278	transcript14475.2.nnic	novel_not_in_catalog	at_least_one_novel_splicesite	380	2	65
Mouse	ENSMUSG00000068264	transcript17669.2.nnic	novel_not_in_catalog	intron_retention	1596	3	65
Mouse	ENSMUSG00000061859	transcript7064.4.nnic	novel_not_in_catalog	at_least_one_novel_splicesite	645	3	65
Mouse	ENSMUSG00000036990	transcript8748.8.nnic	novel_not_in_catalog	at_least_one_novel_splicesite	1392	3	65
Mouse	ENSMUSG00000031875	transcript12704.8.nnic	novel_not_in_catalog	at_least_one_novel_splicesite	801	2	65
Mouse	ENSMUSG00000091472	transcript212.14.nnic	novel_not_in_catalog	at_least_one_novel_splicesite	1825	6	65
Mouse	ENSMUSG00000021996	transcript9625.14.nnic	novel_not_in_catalog	at_least_one_novel_splicesite	1162	10	65
Mouse	ENSMUSG00000086308	transcript13981.2.nnic	novel_not_in_catalog	at_least_one_novel_splicesite	1146	2	64
Mouse	ENSMUSG00000028138	transcript15316.3.nnic	novel_not_in_catalog	at_least_one_novel_splicesite	1480	9	64
Mouse	ENSMUSG00000037664	transcript31847.7.nnic	novel_not_in_catalog	at_least_one_novel_splicesite	921	4	64
Mouse	ENSMUSG00000023791	transcript4793.16.nnic	novel_not_in_catalog	at_least_one_novel_splicesite	1131	6	64
Mouse	ENSMUSG00000000127	transcript15863.17.nnic	novel_not_in_catalog	at_least_one_novel_splicesite	502	3	64
Mouse	ENSMUSG00000015222	transcript5809.1.nnic	novel_not_in_catalog	at_least_one_novel_splicesite	2042	2	63
Mouse	ENSMUSG00000028369	transcript5140.4.nnic	novel_not_in_catalog	at_least_one_novel_splicesite	3865	11	63
Mouse	ENSMUSG00000031628	transcript4464.8.nnic	novel_not_in_catalog	at_least_one_novel_splicesite	1862	3	63
Mouse	ENSMUSG00000050357	transcript13375.8.nnic	novel_not_in_catalog	at_least_one_novel_splicesite	1525	10	63
Mouse	ENSMUSG00000066839	transcript2461.9.nnic	novel_not_in_catalog	at_least_one_novel_splicesite	1417	7	63
Mouse	ENSMUSG00000040043	transcript15729.10.nnic	novel_not_in_catalog	at_least_one_novel_splicesite	1522	13	63
Mouse	ENSMUSG00000021967	transcript7489.14.nnic	novel_not_in_catalog	at_least_one_novel_splicesite	1023	3	63
Mouse	ENSMUSG00000027835	transcript4677.3.nnic	novel_not_in_catalog	at_least_one_novel_splicesite	1283	8	62
Mouse	ENSMUSG00000061762	transcript723.6.nnic	novel_not_in_catalog	at_least_one_novel_splicesite	1093	6	62
Mouse	ENSMUSG00000030801	transcript26431.7.nnic	novel_not_in_catalog	at_least_one_novel_splicesite	1443	12	62
Mouse	ENSMUSG00000033022	transcript4305.18.nnic	novel_not_in_catalog	at_least_one_novel_splicesite	1731	5	62
Mouse	ENSMUSG00000005087	transcript12416.2.nnic	novel_not_in_catalog	at_least_one_novel_splicesite	1575	9	61
Mouse	ENSMUSG00000027384	transcript18247.2.nnic	novel_not_in_catalog	at_least_one_novel_splicesite	1228	11	61
Mouse	ENSMUSG00000032202	transcript11829.9.nnic	novel_not_in_catalog	at_least_one_novel_splicesite	553	2	61
Mouse	ENSMUSG00000032349	transcript12248.9.nnic	novel_not_in_catalog	at_least_one_novel_splicesite	523	2	61
Mouse	ENSMUSG00000000934	transcript4892.15.nnic	novel_not_in_catalog	at_least_one_novel_splicesite	630	3	61
Mouse	ENSMUSG00000034377	transcript314.17.nnic	novel_not_in_catalog	at_least_one_novel_splicesite	801	3	61
Mouse	ENSMUSG00000024238	transcript247.18.nnic	novel_not_in_catalog	at_least_one_novel_splicesite	1707	3	61
Mouse	ENSMUSG00000015290	transcript4547.X.nnic	novel_not_in_catalog	at_least_one_novel_splicesite	792	5	61
Mouse	ENSMUSG00000038077	transcript14841.6.nnic	novel_not_in_catalog	at_least_one_novel_splicesite	1730	3	60
Mouse	ENSMUSG00000078815	transcript62.7.nnic	novel_not_in_catalog	at_least_one_novel_splicesite	2253	3	60
Mouse	ENSMUSG00000063808	transcript10486.7.nnic	novel_not_in_catalog	at_least_one_novel_splicesite	852	2	60
Mouse	ENSMUSG00000020457	transcript143.11.nnic	novel_not_in_catalog	at_least_one_novel_splicesite	170	2	60
Mouse	ENSMUSG00000032985	transcript2976.11.nnic	novel_not_in_catalog	at_least_one_novel_splicesite	895	2	60
Mouse	ENSMUSG00000002661	transcript15583.17.nnic	novel_not_in_catalog	at_least_one_novel_splicesite	564	4	60
Mouse	ENSMUSG00000047656	transcript3739.19.nnic	novel_not_in_catalog	at_least_one_novel_splicesite	1114	7	60
Mouse	ENSMUSG00000024983	transcript10972.19.nnic	novel_not_in_catalog	at_least_one_novel_splicesite	1268	2	60
Mouse	ENSMUSG00000040713	transcript16335.1.nnic	novel_not_in_catalog	at_least_one_novel_splicesite	325	3	59
Mouse	ENSMUSG00000027035	transcript8495.2.nnic	novel_not_in_catalog	at_least_one_novel_splicesite	1235	2	59
Mouse	ENSMUSG00000037773	transcript17289.2.nnic	novel_not_in_catalog	at_least_one_novel_splicesite	1108	2	59
Mouse	ENSMUSG00000037017	transcript18364.5.nnic	novel_not_in_catalog	at_least_one_novel_splicesite	983	2	59
Mouse	ENSMUSG00000047037	transcript14950.7.nnic	novel_not_in_catalog	at_least_one_novel_splicesite	1208	2	59
Mouse	ENSMUSG00000061723	transcript30920.7.nnic	novel_not_in_catalog	at_least_one_novel_splicesite	1181	2	59
Mouse	ENSMUSG00000038622	transcript3068.15.nnic	novel_not_in_catalog	at_least_one_novel_splicesite	787	4	59
Mouse	ENSMUSG00000043542	transcript110.3.nnic	novel_not_in_catalog	at_least_one_novel_splicesite	1399	10	58
Mouse	ENSMUSG00000036402	transcript6190.6.nnic	novel_not_in_catalog	at_least_one_novel_splicesite	1032	3	58
Mouse	ENSMUSG00000087150	transcript15321.6.nnic	novel_not_in_catalog	at_least_one_novel_splicesite	500	4	58
Mouse	ENSMUSG00000020085	transcript4910.10.nnic	novel_not_in_catalog	at_least_one_novel_splicesite	712	2	58
Mouse	ENSMUSG00000014603	transcript12158.3.nnic	novel_not_in_catalog	at_least_one_novel_splicesite	1571	3	57
Mouse	ENSMUSG00000034762	transcript8104.4.nnic	novel_not_in_catalog	at_least_one_novel_splicesite	1454	3	57
Mouse	ENSMUSG00000044339	transcript11178.5.nnic	novel_not_in_catalog	at_least_one_novel_splicesite	1242	3	57
Mouse	ENSMUSG00000029439	transcript15249.5.nnic	novel_not_in_catalog	intron_retention	1853	4	57
Mouse	ENSMUSG00000092402	transcript17387.5.nnic	novel_not_in_catalog	at_least_one_novel_splicesite	748	2	57
Mouse	ENSMUSG00000029729	transcript18359.5.nnic	novel_not_in_catalog	at_least_one_novel_splicesite	927	2	57
Mouse	ENSMUSG00000019831	transcript3086.10.nnic	novel_not_in_catalog	at_least_one_novel_splicesite	746	2	57
Mouse	ENSMUSG00000091523	transcript16006.11.nnic	novel_not_in_catalog	at_least_one_novel_splicesite	631	3	57
Mouse	ENSMUSG00000001497	transcript3923.12.nnic	novel_not_in_catalog	at_least_one_novel_splicesite	1702	4	57
Mouse	ENSMUSG00000021700	transcript11326.13.nnic	novel_not_in_catalog	at_least_one_novel_splicesite	839	3	57
Mouse	ENSMUSG00000040272	transcript11937.2.nnic	novel_not_in_catalog	at_least_one_novel_splicesite	1152	3	56
Mouse	ENSMUSG00000044991	transcript17940.2.nnic	novel_not_in_catalog	at_least_one_novel_splicesite	453	3	56
Mouse	ENSMUSG00000046229	transcript21359.2.nnic	novel_not_in_catalog	at_least_one_novel_splicesite	202	3	56
Mouse	ENSMUSG00000027642	transcript21742.2.nnic	novel_not_in_catalog	at_least_one_novel_splicesite	1244	9	56
Mouse	ENSMUSG00000028436	transcript2421.4.nnic	novel_not_in_catalog	at_least_one_novel_splicesite	1672	2	56
Mouse	ENSMUSG00000060288	transcript10986.4.nnic	novel_not_in_catalog	at_least_one_novel_splicesite	422	3	56
Mouse	ENSMUSG00000037206	transcript7687.9.nnic	novel_not_in_catalog	at_least_one_novel_splicesite	2125	2	56
Mouse	ENSMUSG00000032410	transcript14248.9.nnic	novel_not_in_catalog	at_least_one_novel_splicesite	915	2	56
Mouse	ENSMUSG00000039275	transcript30200.11.nnic	novel_not_in_catalog	at_least_one_novel_splicesite	1196	2	56
Mouse	ENSMUSG00000094870	transcript12202.13.nnic	novel_not_in_catalog	at_least_one_novel_splicesite	1236	2	56
Mouse	ENSMUSG00000024055	transcript7647.17.nnic	novel_not_in_catalog	at_least_one_novel_splicesite	1522	8	56
Mouse	ENSMUSG00000056116	transcript10735.17.nnic	novel_not_in_catalog	intron_retention	1701	9	56
Mouse	ENSMUSG00000026723	transcript1244.2.nnic	novel_not_in_catalog	at_least_one_novel_splicesite	1893	10	55
Mouse	ENSMUSG00000038619	transcript9851.3.nnic	novel_not_in_catalog	at_least_one_novel_splicesite	685	5	55
Mouse	ENSMUSG00000029681	transcript16608.5.nnic	novel_not_in_catalog	at_least_one_novel_splicesite	589	3	55
Mouse	ENSMUSG00000031938	transcript823.9.nnic	novel_not_in_catalog	at_least_one_novel_splicesite	275	2	55
Mouse	ENSMUSG00000032322	transcript6978.9.nnic	novel_not_in_catalog	at_least_one_novel_splicesite	1523	15	55
Mouse	ENSMUSG00000022595	transcript4596.15.nnic	novel_not_in_catalog	at_least_one_novel_splicesite	656	4	55
Mouse	ENSMUSG00000060284	transcript13924.15.nnic	novel_not_in_catalog	at_least_one_novel_splicesite	1015	2	55
Mouse	ENSMUSG00000024501	transcript4038.18.nnic	novel_not_in_catalog	at_least_one_novel_splicesite	1012	2	55
Mouse	ENSMUSG00000031256	transcript7299.X.nnic	novel_not_in_catalog	at_least_one_novel_splicesite	1820	2	55
Mouse	ENSMUSG00000026817	transcript5643.2.nnic	novel_not_in_catalog	at_least_one_novel_splicesite	957	7	54
Mouse	ENSMUSG00000042642	transcript7531.3.nnic	novel_not_in_catalog	at_least_one_novel_splicesite	182	2	54
Mouse	ENSMUSG00000045438	transcript18841.5.nnic	novel_not_in_catalog	at_least_one_novel_splicesite	971	4	54
Mouse	ENSMUSG00000032126	transcript4361.9.nnic	novel_not_in_catalog	intron_retention	1668	13	54
Mouse	ENSMUSG00000034487	transcript6321.9.nnic	novel_not_in_catalog	at_least_one_novel_splicesite	769	2	54
Mouse	ENSMUSG00000097487	transcript22478.11.nnic	novel_not_in_catalog	at_least_one_novel_splicesite	1148	7	54
Mouse	ENSMUSG00000022546	transcript6186.15.nnic	novel_not_in_catalog	at_least_one_novel_splicesite	514	2	54
Mouse	ENSMUSG00000024758	transcript4448.19.nnic	novel_not_in_catalog	at_least_one_novel_splicesite	250	2	54
Mouse	ENSMUSG00000029304	transcript9131.5.nnic	novel_not_in_catalog	at_least_one_novel_splicesite	1860	8	53
Mouse	ENSMUSG00000032553	transcript15164.9.nnic	novel_not_in_catalog	at_least_one_novel_splicesite	1769	8	53
Mouse	ENSMUSG00000019856	transcript3960.10.nnic	novel_not_in_catalog	at_least_one_novel_splicesite	1028	4	53
Mouse	ENSMUSG00000021932	transcript7954.14.nnic	novel_not_in_catalog	at_least_one_novel_splicesite	363	2	53
Mouse	ENSMUSG00000003680	transcript4835.19.nnic	novel_not_in_catalog	at_least_one_novel_splicesite	795	5	53
Mouse	ENSMUSG00000068735	transcript11832.2.nnic	novel_not_in_catalog	at_least_one_novel_splicesite	1647	2	52
Mouse	ENSMUSG00000028010	transcript14178.3.nnic	novel_not_in_catalog	at_least_one_novel_splicesite	678	4	52
Mouse	ENSMUSG00000037210	transcript3891.5.nnic	novel_not_in_catalog	at_least_one_novel_splicesite	334	2	52
Mouse	ENSMUSG00000030649	transcript19859.7.nnic	novel_not_in_catalog	at_least_one_novel_splicesite	928	6	52
Mouse	ENSMUSG00000003355	transcript11589.15.nnic	novel_not_in_catalog	at_least_one_novel_splicesite	665	5	52
Mouse	ENSMUSG00000078578	transcript15005.3.nnic	novel_not_in_catalog	at_least_one_novel_splicesite	564	2	51
Mouse	ENSMUSG00000028910	transcript14211.4.nnic	novel_not_in_catalog	at_least_one_novel_splicesite	1112	8	51
Mouse	ENSMUSG00000097145	transcript5257.5.nnic	novel_not_in_catalog	at_least_one_novel_splicesite	1087	5	51
Mouse	ENSMUSG00000032757	transcript67.6.nnic	novel_not_in_catalog	at_least_one_novel_splicesite	437	4	51
Mouse	ENSMUSG00000030649	transcript19850.7.nnic	novel_not_in_catalog	at_least_one_novel_splicesite	896	6	51
Mouse	ENSMUSG00000014592	transcript19524.4.nnic	novel_not_in_catalog	at_least_one_novel_splicesite	1153	6	50
Mouse	ENSMUSG00000057092	transcript10057.7.nnic	novel_not_in_catalog	at_least_one_novel_splicesite	473	6	50
Mouse	ENSMUSG00000021534	transcript7483.13.nnic	novel_not_in_catalog	intron_retention	667	3	50
Mouse	ENSMUSG00000023800	transcript89.17.nnic	novel_not_in_catalog	at_least_one_novel_splicesite	899	3	50
Mouse	ENSMUSG00000026708	transcript15660.1.nnic	novel_not_in_catalog	at_least_one_novel_splicesite	1672	5	49
Mouse	ENSMUSG00000026985	transcript2005.2.nnic	novel_not_in_catalog	at_least_one_novel_splicesite	931	2	49
Mouse	ENSMUSG00000027646	transcript21836.2.nnic	novel_not_in_catalog	at_least_one_novel_splicesite	988	2	49
Mouse	ENSMUSG00000039745	transcript14764.7.nnic	novel_not_in_catalog	at_least_one_novel_splicesite	1078	7	49
Mouse	ENSMUSG00000031575	transcript2548.8.nnic	novel_not_in_catalog	at_least_one_novel_splicesite	855	5	49
Mouse	ENSMUSG00000044791	transcript17649.9.nnic	novel_not_in_catalog	at_least_one_novel_splicesite	1277	6	49
Mouse	ENSMUSG00000025784	transcript19486.9.nnic	novel_not_in_catalog	at_least_one_novel_splicesite	1431	4	49
Mouse	ENSMUSG00000018500	transcript9524.11.nnic	novel_not_in_catalog	at_least_one_novel_splicesite	1459	2	49
Mouse	ENSMUSG00000022415	transcript8006.15.nnic	novel_not_in_catalog	at_least_one_novel_splicesite	1374	4	49
Mouse	ENSMUSG00000035642	transcript18742.7.nnic	novel_not_in_catalog	at_least_one_novel_splicesite	694	3	48
Mouse	ENSMUSG00000019791	transcript2321.10.nnic	novel_not_in_catalog	at_least_one_novel_splicesite	718	5	48
Mouse	ENSMUSG00000022902	transcript5787.16.nnic	novel_not_in_catalog	at_least_one_novel_splicesite	429	3	48
Mouse	ENSMUSG00000026674	transcript16679.1.nnic	novel_not_in_catalog	at_least_one_novel_splicesite	1245	6	47
Mouse	ENSMUSG00000027942	transcript7646.3.nnic	novel_not_in_catalog	intron_retention	1869	10	47
Mouse	ENSMUSG00000018666	transcript19455.11.nnic	novel_not_in_catalog	at_least_one_novel_splicesite	1366	6	47
Mouse	ENSMUSG00000035067	transcript8169.14.nnic	novel_not_in_catalog	at_least_one_novel_splicesite	1419	2	47
Mouse	ENSMUSG00000022201	transcript849.15.nnic	novel_not_in_catalog	at_least_one_novel_splicesite	671	3	47
Mouse	ENSMUSG00000039168	transcript1260.15.nnic	novel_not_in_catalog	at_least_one_novel_splicesite	505	5	47
Mouse	ENSMUSG00000018893	transcript6358.15.nnic	novel_not_in_catalog	at_least_one_novel_splicesite	937	3	47
Mouse	ENSMUSG00000034432	transcript9107.1.nnic	novel_not_in_catalog	at_least_one_novel_splicesite	1483	8	46
Mouse	ENSMUSG00000055067	transcript18415.1.nnic	novel_not_in_catalog	at_least_one_novel_splicesite	1089	7	46
Mouse	ENSMUSG00000001021	transcript8412.3.nnic	novel_not_in_catalog	at_least_one_novel_splicesite	843	3	46
Mouse	ENSMUSG00000004814	transcript16666.5.nnic	novel_not_in_catalog	intron_retention	744	3	46
Mouse	ENSMUSG00000025102	transcript17406.7.nnic	novel_not_in_catalog	at_least_one_novel_splicesite	907	5	46
Mouse	ENSMUSG00000031447	transcript1053.8.nnic	novel_not_in_catalog	at_least_one_novel_splicesite	939	2	46
Mouse	ENSMUSG00000035863	transcript7639.10.nnic	novel_not_in_catalog	at_least_one_novel_splicesite	1063	2	46
Mouse	ENSMUSG00000041798	transcript1246.11.nnic	novel_not_in_catalog	intron_retention	1171	2	46
Mouse	ENSMUSG00000021319	transcript1041.13.nnic	novel_not_in_catalog	at_least_one_novel_splicesite	2115	6	46
Mouse	ENSMUSG00000025873	transcript5071.13.nnic	novel_not_in_catalog	at_least_one_novel_splicesite	1186	2	46
Mouse	ENSMUSG00000021508	transcript6084.13.nnic	novel_not_in_catalog	at_least_one_novel_splicesite	821	4	46
Mouse	ENSMUSG00000041625	transcript11769.14.nnic	novel_not_in_catalog	intron_retention	1154	3	46
Mouse	ENSMUSG00000025423	transcript7179.18.nnic	novel_not_in_catalog	at_least_one_novel_splicesite	1128	2	46
Mouse	ENSMUSG00000026035	transcript4237.1.nnic	novel_not_in_catalog	at_least_one_novel_splicesite	929	7	45
Mouse	ENSMUSG00000040269	transcript372.3.nnic	novel_not_in_catalog	at_least_one_novel_splicesite	374	2	45
Mouse	ENSMUSG00000043411	transcript16633.4.nnic	novel_not_in_catalog	at_least_one_novel_splicesite	411	4	45
Mouse	ENSMUSG00000003477	transcript5439.6.nnic	novel_not_in_catalog	at_least_one_novel_splicesite	1485	3	45
Mouse	ENSMUSG00000002222	transcript6549.6.nnic	novel_not_in_catalog	at_least_one_novel_splicesite	1375	8	45
Mouse	ENSMUSG00000021217	transcript10654.7.nnic	novel_not_in_catalog	at_least_one_novel_splicesite	1272	3	45
Mouse	ENSMUSG00000030669	transcript22916.7.nnic	novel_not_in_catalog	at_least_one_novel_splicesite	1188	5	45
Mouse	ENSMUSG00000059060	transcript6429.12.nnic	novel_not_in_catalog	at_least_one_novel_splicesite	684	3	45
Mouse	ENSMUSG00000023156	transcript340.14.nnic	novel_not_in_catalog	at_least_one_novel_splicesite	1229	6	45
Mouse	ENSMUSG00000015094	transcript2450.2.nnic	novel_not_in_catalog	at_least_one_novel_splicesite	1403	8	44
Mouse	ENSMUSG00000027131	transcript13379.2.nnic	novel_not_in_catalog	at_least_one_novel_splicesite	1301	6	44
Mouse	ENSMUSG00000027601	transcript1235.3.nnic	novel_not_in_catalog	at_least_one_novel_splicesite	924	2	44
Mouse	ENSMUSG00000045973	transcript4130.4.nnic	novel_not_in_catalog	at_least_one_novel_splicesite	1697	2	44
Mouse	ENSMUSG00000029290	transcript9333.5.nnic	novel_not_in_catalog	at_least_one_novel_splicesite	984	2	44
Mouse	ENSMUSG00000038600	transcript3016.6.nnic	novel_not_in_catalog	intron_retention	1213	6	44
Mouse	ENSMUSG00000030753	transcript18987.7.nnic	novel_not_in_catalog	at_least_one_novel_splicesite	1354	2	44
Mouse	ENSMUSG00000031843	transcript15485.8.nnic	novel_not_in_catalog	at_least_one_novel_splicesite	417	3	44
Mouse	ENSMUSG00000032228	transcript11487.9.nnic	novel_not_in_catalog	at_least_one_novel_splicesite	1033	2	44
Mouse	ENSMUSG00000066235	transcript19246.9.nnic	novel_not_in_catalog	at_least_one_novel_splicesite	942	3	44
Mouse	ENSMUSG00000097353	transcript16278.10.nnic	novel_not_in_catalog	at_least_one_novel_splicesite	809	3	44
Mouse	ENSMUSG00000020889	transcript20560.11.nnic	novel_not_in_catalog	at_least_one_novel_splicesite	930	2	44
Mouse	ENSMUSG00000015971	transcript2759.14.nnic	novel_not_in_catalog	at_least_one_novel_splicesite	479	3	44
Mouse	ENSMUSG00000026496	transcript18606.1.nnic	novel_not_in_catalog	at_least_one_novel_splicesite	296	2	43
Mouse	ENSMUSG00000075467	transcript3150.2.nnic	novel_not_in_catalog	at_least_one_novel_splicesite	645	2	43
Mouse	ENSMUSG00000027479	transcript20148.2.nnic	novel_not_in_catalog	at_least_one_novel_splicesite	1007	7	43
Mouse	ENSMUSG00000005378	transcript16464.5.nnic	novel_not_in_catalog	at_least_one_novel_splicesite	1322	12	43
Mouse	ENSMUSG00000034867	transcript10596.7.nnic	novel_not_in_catalog	at_least_one_novel_splicesite	852	2	43
Mouse	ENSMUSG00000018858	transcript25595.11.nnic	novel_not_in_catalog	at_least_one_novel_splicesite	945	7	43
Mouse	ENSMUSG00000025150	transcript29773.11.nnic	novel_not_in_catalog	at_least_one_novel_splicesite	368	4	43
Mouse	ENSMUSG00000021773	transcript2032.14.nnic	novel_not_in_catalog	intron_retention	1094	6	43
Mouse	ENSMUSG00000023051	transcript13942.15.nnic	novel_not_in_catalog	at_least_one_novel_splicesite	1707	9	43
Mouse	ENSMUSG00000059363	transcript6911.19.nnic	novel_not_in_catalog	at_least_one_novel_splicesite	1033	3	43
Mouse	ENSMUSG00000046828	transcript3076.1.nnic	novel_not_in_catalog	at_least_one_novel_splicesite	964	6	42
Mouse	ENSMUSG00000030611	transcript16290.7.nnic	novel_not_in_catalog	at_least_one_novel_splicesite	1434	6	42
Mouse	ENSMUSG00000058325	transcript27566.7.nnic	novel_not_in_catalog	at_least_one_novel_splicesite	535	2	42
Mouse	ENSMUSG00000048583	transcript31560.7.nnic	novel_not_in_catalog	at_least_one_novel_splicesite	1300	2	42
Mouse	ENSMUSG00000050914	transcript4213.8.nnic	novel_not_in_catalog	at_least_one_novel_splicesite	1093	5	42
Mouse	ENSMUSG00000021998	transcript9687.14.nnic	novel_not_in_catalog	at_least_one_novel_splicesite	716	2	42
Mouse	ENSMUSG00000053929	transcript6017.15.nnic	novel_not_in_catalog	at_least_one_novel_splicesite	1362	4	42
Mouse	ENSMUSG00000022799	transcript6341.16.nnic	novel_not_in_catalog	at_least_one_novel_splicesite	1361	2	42
Mouse	ENSMUSG00000099553	transcript9005.1.nnic	novel_not_in_catalog	at_least_one_novel_splicesite	561	3	41
Mouse	ENSMUSG00000027378	transcript16777.2.nnic	novel_not_in_catalog	at_least_one_novel_splicesite	731	5	41
Mouse	ENSMUSG00000043164	transcript1558.3.nnic	novel_not_in_catalog	at_least_one_novel_splicesite	595	4	41
Mouse	ENSMUSG00000045092	transcript13011.3.nnic	novel_not_in_catalog	at_least_one_novel_splicesite	1096	2	41
Mouse	ENSMUSG00000027968	transcript13983.3.nnic	novel_not_in_catalog	at_least_one_novel_splicesite	845	6	41
Mouse	ENSMUSG00000032870	transcript11137.4.nnic	novel_not_in_catalog	at_least_one_novel_splicesite	1171	9	41
Mouse	ENSMUSG00000028969	transcript1446.5.nnic	novel_not_in_catalog	at_least_one_novel_splicesite	1667	12	41
Mouse	ENSMUSG00000020722	transcript24712.11.nnic	novel_not_in_catalog	at_least_one_novel_splicesite	1155	4	41
Mouse	ENSMUSG00000079471	transcript12864.17.nnic	novel_not_in_catalog	at_least_one_novel_splicesite	869	2	41
Mouse	ENSMUSG00000001870	transcript17048.17.nnic	novel_not_in_catalog	at_least_one_novel_splicesite	829	2	41
Mouse	ENSMUSG00000105139	transcript12927.3.nnic	novel_not_in_catalog	at_least_one_novel_splicesite	749	2	40
Mouse	ENSMUSG00000028999	transcript1297.5.nnic	novel_not_in_catalog	at_least_one_novel_splicesite	1314	4	40
Mouse	ENSMUSG00000075225	transcript3213.10.nnic	novel_not_in_catalog	at_least_one_novel_splicesite	775	4	40
Mouse	ENSMUSG00000007777	transcript6401.11.nnic	novel_not_in_catalog	at_least_one_novel_splicesite	1023	2	40
Mouse	ENSMUSG00000041629	transcript25238.11.nnic	novel_not_in_catalog	at_least_one_novel_splicesite	1072	3	40
Mouse	ENSMUSG00000062352	transcript1371.12.nnic	novel_not_in_catalog	at_least_one_novel_splicesite	1089	7	40
Mouse	ENSMUSG00000037466	transcript11701.12.nnic	novel_not_in_catalog	at_least_one_novel_splicesite	963	6	40
Mouse	ENSMUSG00000061068	transcript7205.14.nnic	novel_not_in_catalog	at_least_one_novel_splicesite	1087	5	40
Mouse	ENSMUSG00000022540	transcript625.16.nnic	novel_not_in_catalog	at_least_one_novel_splicesite	1438	11	40
Mouse	ENSMUSG00000033306	transcript4203.16.nnic	novel_not_in_catalog	at_least_one_novel_splicesite	497	2	40
Mouse	ENSMUSG00000116858	transcript50.17.nnic	novel_not_in_catalog	at_least_one_novel_splicesite	1050	3	40
Mouse	ENSMUSG00000045036	transcript15936.17.nnic	novel_not_in_catalog	at_least_one_novel_splicesite	1056	3	40
Mouse	ENSMUSG00000079614	transcript6319.18.nnic	novel_not_in_catalog	at_least_one_novel_splicesite	1716	8	40
Mouse	ENSMUSG00000026113	transcript2023.1.nnic	novel_not_in_catalog	at_least_one_novel_splicesite	1362	2	39
Mouse	ENSMUSG00000073643	transcript7824.1.nnic	novel_not_in_catalog	at_least_one_novel_splicesite	902	2	39
Mouse	ENSMUSG00000027030	transcript8426.2.nnic	novel_not_in_catalog	at_least_one_novel_splicesite	544	6	39
Mouse	ENSMUSG00000062761	transcript3113.5.nnic	novel_not_in_catalog	at_least_one_novel_splicesite	1508	2	39
Mouse	ENSMUSG00000029265	transcript9668.5.nnic	novel_not_in_catalog	at_least_one_novel_splicesite	480	2	39
Mouse	ENSMUSG00000002043	transcript4427.7.nnic	novel_not_in_catalog	at_least_one_novel_splicesite	1098	2	39
Mouse	ENSMUSG00000064215	transcript9361.12.nnic	novel_not_in_catalog	at_least_one_novel_splicesite	952	6	39
Mouse	ENSMUSG00000034532	transcript8324.14.nnic	novel_not_in_catalog	at_least_one_novel_splicesite	1441	9	39
Mouse	ENSMUSG00000022577	transcript4778.15.nnic	novel_not_in_catalog	at_least_one_novel_splicesite	942	4	39
Mouse	ENSMUSG00000024063	transcript16793.17.nnic	novel_not_in_catalog	at_least_one_novel_splicesite	863	3	39
Mouse	ENSMUSG00000074733	transcript11598.19.nnic	novel_not_in_catalog	at_least_one_novel_splicesite	661	5	39
Mouse	ENSMUSG00000026209	transcript7381.1.nnic	novel_not_in_catalog	at_least_one_novel_splicesite	1667	15	38
Mouse	ENSMUSG00000028641	transcript10849.4.nnic	novel_not_in_catalog	at_least_one_novel_splicesite	410	2	38
Mouse	ENSMUSG00000028885	transcript14798.4.nnic	novel_not_in_catalog	at_least_one_novel_splicesite	2070	8	38
Mouse	ENSMUSG00000042213	transcript12084.6.nnic	novel_not_in_catalog	at_least_one_novel_splicesite	1448	2	38
Mouse	ENSMUSG00000060032	transcript16040.6.nnic	novel_not_in_catalog	at_least_one_novel_splicesite	343	2	38
Mouse	ENSMUSG00000034263	transcript9677.9.nnic	novel_not_in_catalog	at_least_one_novel_splicesite	2573	13	38
Mouse	ENSMUSG00000047547	transcript4930.13.nnic	novel_not_in_catalog	at_least_one_novel_splicesite	799	5	38
Mouse	ENSMUSG00000021760	transcript11599.13.nnic	novel_not_in_catalog	at_least_one_novel_splicesite	1165	4	38
Mouse	ENSMUSG00000067795	transcript793.1.nnic	novel_not_in_catalog	at_least_one_novel_splicesite	397	3	37
Mouse	ENSMUSG00000054920	transcript5630.5.nnic	novel_not_in_catalog	at_least_one_novel_splicesite	1156	2	37
Mouse	ENSMUSG00000095385	transcript4174.9.nnic	novel_not_in_catalog	at_least_one_novel_splicesite	675	3	37
Mouse	ENSMUSG00000022656	transcript7072.16.nnic	novel_not_in_catalog	at_least_one_novel_splicesite	957	3	37
Mouse	ENSMUSG00000019647	transcript4447.18.nnic	novel_not_in_catalog	at_least_one_novel_splicesite	684	2	37
Mouse	ENSMUSG00000037369	transcript1144.X.nnic	novel_not_in_catalog	at_least_one_novel_splicesite	901	2	37
Mouse	ENSMUSG00000071723	transcript5208.X.nnic	novel_not_in_catalog	at_least_one_novel_splicesite	776	4	37
Mouse	ENSMUSG00000026020	transcript4751.1.nnic	novel_not_in_catalog	at_least_one_novel_splicesite	936	2	36
Mouse	ENSMUSG00000026970	transcript8050.2.nnic	novel_not_in_catalog	at_least_one_novel_splicesite	1974	14	36
Mouse	ENSMUSG00000044405	transcript22558.2.nnic	novel_not_in_catalog	at_least_one_novel_splicesite	637	3	36
Mouse	ENSMUSG00000103428	transcript4646.3.nnic	novel_not_in_catalog	at_least_one_novel_splicesite	867	2	36
Mouse	ENSMUSG00000035212	transcript7309.4.nnic	novel_not_in_catalog	at_least_one_novel_splicesite	1033	5	36
Mouse	ENSMUSG00000098649	transcript12571.5.nnic	novel_not_in_catalog	at_least_one_novel_splicesite	320	2	36
Mouse	ENSMUSG00000045160	transcript7964.6.nnic	novel_not_in_catalog	at_least_one_novel_splicesite	680	4	36
Mouse	ENSMUSG00000031629	transcript4412.8.nnic	novel_not_in_catalog	at_least_one_novel_splicesite	1019	8	36
Mouse	ENSMUSG00000031949	transcript15092.8.nnic	novel_not_in_catalog	at_least_one_novel_splicesite	331	2	36
Mouse	ENSMUSG00000034189	transcript15664.8.nnic	novel_not_in_catalog	at_least_one_novel_splicesite	304	2	36
Mouse	ENSMUSG00000096472	transcript1966.9.nnic	novel_not_in_catalog	at_least_one_novel_splicesite	1214	3	36
Mouse	ENSMUSG00000003410	transcript2425.9.nnic	novel_not_in_catalog	at_least_one_novel_splicesite	1050	2	36
Mouse	ENSMUSG00000017446	transcript27932.11.nnic	novel_not_in_catalog	at_least_one_novel_splicesite	423	2	36
Mouse	ENSMUSG00000060073	transcript4977.12.nnic	novel_not_in_catalog	at_least_one_novel_splicesite	1263	13	36
Mouse	ENSMUSG00000055128	transcript4673.14.nnic	novel_not_in_catalog	at_least_one_novel_splicesite	1399	6	36
Mouse	ENSMUSG00000025630	transcript2838.X.nnic	novel_not_in_catalog	at_least_one_novel_splicesite	378	2	36
Mouse	ENSMUSG00000004896	transcript5498.3.nnic	novel_not_in_catalog	at_least_one_novel_splicesite	1795	8	35
Mouse	ENSMUSG00000042306	transcript8273.3.nnic	novel_not_in_catalog	at_least_one_novel_splicesite	302	4	35
Mouse	ENSMUSG00000027959	transcript13214.3.nnic	novel_not_in_catalog	at_least_one_novel_splicesite	1962	2	35
Mouse	ENSMUSG00000029125	transcript4446.5.nnic	novel_not_in_catalog	at_least_one_novel_splicesite	1506	10	35
Mouse	ENSMUSG00000072774	transcript9232.5.nnic	novel_not_in_catalog	at_least_one_novel_splicesite	616	2	35
Mouse	ENSMUSG00000047420	transcript2672.6.nnic	novel_not_in_catalog	at_least_one_novel_splicesite	1591	3	35
Mouse	ENSMUSG00000061353	transcript12167.6.nnic	novel_not_in_catalog	at_least_one_novel_splicesite	537	4	35
Mouse	ENSMUSG00000058325	transcript27564.7.nnic	novel_not_in_catalog	at_least_one_novel_splicesite	1127	2	35
Mouse	ENSMUSG00000049154	transcript8113.11.nnic	novel_not_in_catalog	at_least_one_novel_splicesite	522	3	35
Mouse	ENSMUSG00000021932	transcript7956.14.nnic	novel_not_in_catalog	at_least_one_novel_splicesite	770	2	35
Mouse	ENSMUSG00000101671	transcript2293.15.nnic	novel_not_in_catalog	intron_retention	1938	2	35
Mouse	ENSMUSG00000116652	transcript2418.16.nnic	novel_not_in_catalog	at_least_one_novel_splicesite	1030	2	35
Mouse	ENSMUSG00000033972	transcript2299.17.nnic	novel_not_in_catalog	at_least_one_novel_splicesite	708	6	35
Mouse	ENSMUSG00000019579	transcript14970.17.nnic	novel_not_in_catalog	at_least_one_novel_splicesite	327	3	35
Mouse	ENSMUSG00000023965	transcript15834.17.nnic	novel_not_in_catalog	at_least_one_novel_splicesite	1642	6	35
Mouse	ENSMUSG00000073599	transcript2601.18.nnic	novel_not_in_catalog	at_least_one_novel_splicesite	1208	10	35
Mouse	ENSMUSG00000024963	transcript3982.19.nnic	novel_not_in_catalog	at_least_one_novel_splicesite	996	5	35
Mouse	ENSMUSG00000067873	transcript3108.X.nnic	novel_not_in_catalog	at_least_one_novel_splicesite	1007	5	35
Mouse	ENSMUSG00000048402	transcript11033.1.nnic	novel_not_in_catalog	at_least_one_novel_splicesite	496	2	34
Mouse	ENSMUSG00000035268	transcript23019.2.nnic	novel_not_in_catalog	at_least_one_novel_splicesite	1104	5	34
Mouse	ENSMUSG00000042390	transcript8098.3.nnic	novel_not_in_catalog	at_least_one_novel_splicesite	1236	2	34
Mouse	ENSMUSG00000087366	transcript6905.4.nnic	novel_not_in_catalog	at_least_one_novel_splicesite	529	4	34
Mouse	ENSMUSG00000008348	transcript14743.5.nnic	novel_not_in_catalog	at_least_one_novel_splicesite	1956	3	34
Mouse	ENSMUSG00000029650	transcript21031.5.nnic	novel_not_in_catalog	at_least_one_novel_splicesite	998	3	34
Mouse	ENSMUSG00000039419	transcript3890.6.nnic	novel_not_in_catalog	at_least_one_novel_splicesite	812	2	34
Mouse	ENSMUSG00000059430	transcript8080.6.nnic	novel_not_in_catalog	at_least_one_novel_splicesite	1401	9	34
Mouse	ENSMUSG00000038563	transcript17591.7.nnic	novel_not_in_catalog	at_least_one_novel_splicesite	1092	5	34
Mouse	ENSMUSG00000037134	transcript8505.8.nnic	novel_not_in_catalog	at_least_one_novel_splicesite	1454	4	34
Mouse	ENSMUSG00000041986	transcript6499.9.nnic	novel_not_in_catalog	at_least_one_novel_splicesite	509	3	34
Mouse	ENSMUSG00000020235	transcript10257.10.nnic	novel_not_in_catalog	at_least_one_novel_splicesite	668	2	34
Mouse	ENSMUSG00000021590	transcript8346.13.nnic	novel_not_in_catalog	at_least_one_novel_splicesite	914	3	34
Mouse	ENSMUSG00000021948	transcript2903.14.nnic	novel_not_in_catalog	at_least_one_novel_splicesite	690	2	34
Mouse	ENSMUSG00000039179	transcript1122.16.nnic	novel_not_in_catalog	at_least_one_novel_splicesite	594	2	34
Mouse	ENSMUSG00000002076	transcript7449.17.nnic	novel_not_in_catalog	at_least_one_novel_splicesite	981	2	34
Mouse	ENSMUSG00000003680	transcript4876.19.nnic	novel_not_in_catalog	at_least_one_novel_splicesite	673	4	34
Mouse	ENSMUSG00000006010	transcript13862.1.nnic	novel_not_in_catalog	at_least_one_novel_splicesite	383	2	33
Mouse	ENSMUSG00000043164	transcript1560.3.nnic	novel_not_in_catalog	at_least_one_novel_splicesite	616	4	33
Mouse	ENSMUSG00000074466	transcript7496.3.nnic	novel_not_in_catalog	at_least_one_novel_splicesite	881	2	33
Mouse	ENSMUSG00000089916	transcript11141.3.nnic	novel_not_in_catalog	at_least_one_novel_splicesite	802	2	33
Mouse	ENSMUSG00000029761	transcript2504.6.nnic	novel_not_in_catalog	at_least_one_novel_splicesite	785	3	33
Mouse	ENSMUSG00000030220	transcript16146.6.nnic	novel_not_in_catalog	at_least_one_novel_splicesite	1313	6	33
Mouse	ENSMUSG00000031527	transcript3633.8.nnic	novel_not_in_catalog	at_least_one_novel_splicesite	1519	6	33
Mouse	ENSMUSG00000032057	transcript6168.9.nnic	novel_not_in_catalog	at_least_one_novel_splicesite	917	6	33
Mouse	ENSMUSG00000019795	transcript342.10.nnic	novel_not_in_catalog	at_least_one_novel_splicesite	1109	8	33
Mouse	ENSMUSG00000087400	transcript1988.10.nnic	novel_not_in_catalog	at_least_one_novel_splicesite	900	2	33
Mouse	ENSMUSG00000035873	transcript12990.10.nnic	novel_not_in_catalog	at_least_one_novel_splicesite	1798	6	33
Mouse	ENSMUSG00000001508	transcript18764.11.nnic	novel_not_in_catalog	at_least_one_novel_splicesite	1498	10	33
Mouse	ENSMUSG00000020955	transcript3168.12.nnic	novel_not_in_catalog	at_least_one_novel_splicesite	623	6	33
Mouse	ENSMUSG00000049985	transcript11481.13.nnic	novel_not_in_catalog	at_least_one_novel_splicesite	792	3	33
Mouse	ENSMUSG00000063765	transcript8518.15.nnic	novel_not_in_catalog	at_least_one_novel_splicesite	1223	4	33
Mouse	ENSMUSG00000024175	transcript4266.17.nnic	novel_not_in_catalog	at_least_one_novel_splicesite	1111	6	33
Mouse	ENSMUSG00000024501	transcript3986.18.nnic	novel_not_in_catalog	at_least_one_novel_splicesite	1386	2	33
Mouse	ENSMUSG00000086316	transcript9599.X.nnic	novel_not_in_catalog	at_least_one_novel_splicesite	1423	3	33
Mouse	ENSMUSG00000076441	transcript5205.2.nnic	novel_not_in_catalog	at_least_one_novel_splicesite	933	7	32
Mouse	ENSMUSG00000027245	transcript15765.2.nnic	novel_not_in_catalog	at_least_one_novel_splicesite	205	2	32
Mouse	ENSMUSG00000074872	transcript16108.2.nnic	novel_not_in_catalog	at_least_one_novel_splicesite	757	2	32
Mouse	ENSMUSG00000033752	transcript5057.3.nnic	novel_not_in_catalog	at_least_one_novel_splicesite	580	4	32
Mouse	ENSMUSG00000043333	transcript11496.4.nnic	novel_not_in_catalog	at_least_one_novel_splicesite	1636	8	32
Mouse	ENSMUSG00000097277	transcript17348.7.nnic	novel_not_in_catalog	at_least_one_novel_splicesite	789	4	32
Mouse	ENSMUSG00000035642	transcript18759.7.nnic	novel_not_in_catalog	at_least_one_novel_splicesite	572	3	32
Mouse	ENSMUSG00000044177	transcript18291.11.nnic	novel_not_in_catalog	at_least_one_novel_splicesite	1200	2	32
Mouse	ENSMUSG00000087075	transcript10776.12.nnic	novel_not_in_catalog	at_least_one_novel_splicesite	888	4	32
Mouse	ENSMUSG00000097915	transcript12992.15.nnic	novel_not_in_catalog	at_least_one_novel_splicesite	1303	3	32
Mouse	ENSMUSG00000038781	transcript14440.17.nnic	novel_not_in_catalog	at_least_one_novel_splicesite	1581	13	32
Mouse	ENSMUSG00000026208	transcript7504.1.nnic	novel_not_in_catalog	at_least_one_novel_splicesite	392	2	31
Mouse	ENSMUSG00000028863	transcript11939.4.nnic	novel_not_in_catalog	at_least_one_novel_splicesite	1059	6	31
Mouse	ENSMUSG00000028860	transcript14968.4.nnic	novel_not_in_catalog	at_least_one_novel_splicesite	956	5	31
Mouse	ENSMUSG00000057816	transcript8328.5.nnic	novel_not_in_catalog	at_least_one_novel_splicesite	371	2	31
Mouse	ENSMUSG00000029551	transcript19021.5.nnic	novel_not_in_catalog	at_least_one_novel_splicesite	877	3	31
Mouse	ENSMUSG00000030213	transcript16021.6.nnic	novel_not_in_catalog	at_least_one_novel_splicesite	1115	2	31
Mouse	ENSMUSG00000007837	transcript12308.7.nnic	novel_not_in_catalog	at_least_one_novel_splicesite	1813	6	31
Mouse	ENSMUSG00000030869	transcript24101.7.nnic	novel_not_in_catalog	at_least_one_novel_splicesite	1027	5	31
Mouse	ENSMUSG00000032436	transcript18122.9.nnic	novel_not_in_catalog	at_least_one_novel_splicesite	940	6	31
Mouse	ENSMUSG00000020173	transcript1895.11.nnic	novel_not_in_catalog	at_least_one_novel_splicesite	1438	9	31
Mouse	ENSMUSG00000057054	transcript13396.11.nnic	novel_not_in_catalog	at_least_one_novel_splicesite	995	6	31
Mouse	ENSMUSG00000112390	transcript2027.12.nnic	novel_not_in_catalog	at_least_one_novel_splicesite	1156	3	31
Mouse	ENSMUSG00000021824	transcript1830.14.nnic	novel_not_in_catalog	at_least_one_novel_splicesite	1382	2	31
Mouse	ENSMUSG00000045731	transcript8349.14.nnic	novel_not_in_catalog	at_least_one_novel_splicesite	1187	4	31
Mouse	ENSMUSG00000022106	transcript9363.14.nnic	novel_not_in_catalog	at_least_one_novel_splicesite	905	6	31
Mouse	ENSMUSG00000116852	transcript94.17.nnic	novel_not_in_catalog	at_least_one_novel_splicesite	724	2	31
Mouse	ENSMUSG00000033053	transcript6824.19.nnic	novel_not_in_catalog	at_least_one_novel_splicesite	783	3	31
Mouse	ENSMUSG00000027163	transcript12313.2.nnic	novel_not_in_catalog	at_least_one_novel_splicesite	1267	7	30
Mouse	ENSMUSG00000085438	transcript14626.2.nnic	novel_not_in_catalog	at_least_one_novel_splicesite	548	3	30
Mouse	ENSMUSG00000043164	transcript1551.3.nnic	novel_not_in_catalog	at_least_one_novel_splicesite	983	4	30
Mouse	ENSMUSG00000028995	transcript1397.5.nnic	novel_not_in_catalog	at_least_one_novel_splicesite	692	2	30
Mouse	ENSMUSG00000029154	transcript6731.5.nnic	novel_not_in_catalog	at_least_one_novel_splicesite	837	3	30
Mouse	ENSMUSG00000090063	transcript669.6.nnic	novel_not_in_catalog	at_least_one_novel_splicesite	1694	2	30
Mouse	ENSMUSG00000045896	transcript8223.6.nnic	novel_not_in_catalog	at_least_one_novel_splicesite	764	4	30
Mouse	ENSMUSG00000051256	transcript11303.6.nnic	novel_not_in_catalog	at_least_one_novel_splicesite	1051	2	30
Mouse	ENSMUSG00000030386	transcript1798.7.nnic	novel_not_in_catalog	at_least_one_novel_splicesite	876	5	30
Mouse	ENSMUSG00000048583	transcript31541.7.nnic	novel_not_in_catalog	at_least_one_novel_splicesite	1220	2	30
Mouse	ENSMUSG00000040204	transcript10057.9.nnic	novel_not_in_catalog	at_least_one_novel_splicesite	394	3	30
Mouse	ENSMUSG00000113621	transcript1707.12.nnic	novel_not_in_catalog	at_least_one_novel_splicesite	980	2	30
Mouse	ENSMUSG00000021910	transcript3283.14.nnic	novel_not_in_catalog	at_least_one_novel_splicesite	619	4	30
Mouse	ENSMUSG00000015002	transcript4164.15.nnic	novel_not_in_catalog	at_least_one_novel_splicesite	1218	2	30
Mouse	ENSMUSG00000069833	transcript5397.19.nnic	novel_not_in_catalog	at_least_one_novel_splicesite	1996	3	30
Mouse	ENSMUSG00000001138	transcript1786.1.nnic	novel_not_in_catalog	at_least_one_novel_splicesite	483	2	29
Mouse	ENSMUSG00000060568	transcript16422.1.nnic	novel_not_in_catalog	at_least_one_novel_splicesite	949	2	29
Mouse	ENSMUSG00000027706	transcript1753.3.nnic	novel_not_in_catalog	at_least_one_novel_splicesite	1377	9	29
Mouse	ENSMUSG00000097048	transcript8902.6.nnic	novel_not_in_catalog	at_least_one_novel_splicesite	692	5	29
Mouse	ENSMUSG00000039057	transcript594.8.nnic	novel_not_in_catalog	intron_retention	1580	4	29
Mouse	ENSMUSG00000051243	transcript7716.9.nnic	novel_not_in_catalog	at_least_one_novel_splicesite	451	2	29
Mouse	ENSMUSG00000033953	transcript2114.11.nnic	novel_not_in_catalog	at_least_one_novel_splicesite	314	2	29
Mouse	ENSMUSG00000020940	transcript23469.11.nnic	novel_not_in_catalog	at_least_one_novel_splicesite	1228	8	29
Mouse	ENSMUSG00000022210	transcript6446.14.nnic	novel_not_in_catalog	intron_retention	1054	4	29
Mouse	ENSMUSG00000025213	transcript9440.19.nnic	novel_not_in_catalog	at_least_one_novel_splicesite	1440	5	29
Mouse	ENSMUSG00000002012	transcript3693.X.nnic	novel_not_in_catalog	at_least_one_novel_splicesite	1675	12	29
Mouse	ENSMUSG00000090110	transcript4803.X.nnic	novel_not_in_catalog	at_least_one_novel_splicesite	777	3	29
Mouse	ENSMUSG00000033845	transcript28.1.nnic	novel_not_in_catalog	at_least_one_novel_splicesite	1240	6	28
Mouse	ENSMUSG00000097482	transcript10676.1.nnic	novel_not_in_catalog	at_least_one_novel_splicesite	483	2	28
Mouse	ENSMUSG00000102548	transcript16430.1.nnic	novel_not_in_catalog	at_least_one_novel_splicesite	824	2	28
Mouse	ENSMUSG00000100393	transcript19400.1.nnic	novel_not_in_catalog	at_least_one_novel_splicesite	1063	2	28
Mouse	ENSMUSG00000026946	transcript7581.2.nnic	novel_not_in_catalog	at_least_one_novel_splicesite	1524	8	28
Mouse	ENSMUSG00000036834	transcript4144.3.nnic	novel_not_in_catalog	at_least_one_novel_splicesite	514	2	28
Mouse	ENSMUSG00000097640	transcript5577.5.nnic	novel_not_in_catalog	at_least_one_novel_splicesite	647	3	28
Mouse	ENSMUSG00000097048	transcript8896.6.nnic	novel_not_in_catalog	at_least_one_novel_splicesite	631	5	28
Mouse	ENSMUSG00000085355	transcript17142.6.nnic	novel_not_in_catalog	at_least_one_novel_splicesite	401	2	28
Mouse	ENSMUSG00000030792	transcript13144.7.nnic	novel_not_in_catalog	at_least_one_novel_splicesite	956	6	28
Mouse	ENSMUSG00000030869	transcript24087.7.nnic	novel_not_in_catalog	at_least_one_novel_splicesite	845	6	28
Mouse	ENSMUSG00000005469	transcript9684.8.nnic	novel_not_in_catalog	at_least_one_novel_splicesite	1155	3	28
Mouse	ENSMUSG00000032519	transcript18715.9.nnic	novel_not_in_catalog	at_least_one_novel_splicesite	1672	7	28
Mouse	ENSMUSG00000020107	transcript4492.10.nnic	novel_not_in_catalog	at_least_one_novel_splicesite	788	5	28
Mouse	ENSMUSG00000020173	transcript1884.11.nnic	novel_not_in_catalog	at_least_one_novel_splicesite	1513	10	28
Mouse	ENSMUSG00000022217	transcript6590.14.nnic	novel_not_in_catalog	at_least_one_novel_splicesite	1100	5	28
Mouse	ENSMUSG00000024578	transcript5545.18.nnic	novel_not_in_catalog	at_least_one_novel_splicesite	779	3	28
Mouse	ENSMUSG00000097787	transcript7656.19.nnic	novel_not_in_catalog	at_least_one_novel_splicesite	538	2	28
Mouse	ENSMUSG00000026014	transcript4866.1.nnic	novel_not_in_catalog	at_least_one_novel_splicesite	1103	2	27
Mouse	ENSMUSG00000074981	transcript13036.2.nnic	novel_not_in_catalog	at_least_one_novel_splicesite	675	3	27
Mouse	ENSMUSG00000027536	transcript785.3.nnic	novel_not_in_catalog	at_least_one_novel_splicesite	1323	5	27
Mouse	ENSMUSG00000085836	transcript17842.4.nnic	novel_not_in_catalog	at_least_one_novel_splicesite	559	3	27
Mouse	ENSMUSG00000053293	transcript16637.5.nnic	novel_not_in_catalog	at_least_one_novel_splicesite	1921	2	27
Mouse	ENSMUSG00000058709	transcript6240.7.nnic	novel_not_in_catalog	at_least_one_novel_splicesite	410	3	27
Mouse	ENSMUSG00000074221	transcript8260.7.nnic	novel_not_in_catalog	at_least_one_novel_splicesite	952	2	27
Mouse	ENSMUSG00000035642	transcript18702.7.nnic	novel_not_in_catalog	at_least_one_novel_splicesite	947	4	27
Mouse	ENSMUSG00000040219	transcript5533.9.nnic	novel_not_in_catalog	at_least_one_novel_splicesite	598	4	27
Mouse	ENSMUSG00000025408	transcript14806.10.nnic	novel_not_in_catalog	at_least_one_novel_splicesite	1023	3	27
Mouse	ENSMUSG00000021156	transcript370.13.nnic	novel_not_in_catalog	at_least_one_novel_splicesite	791	6	27
Mouse	ENSMUSG00000018865	transcript9628.15.nnic	novel_not_in_catalog	at_least_one_novel_splicesite	610	2	27
Mouse	ENSMUSG00000078954	transcript9759.15.nnic	novel_not_in_catalog	at_least_one_novel_splicesite	1348	7	27
Mouse	ENSMUSG00000033306	transcript4205.16.nnic	novel_not_in_catalog	at_least_one_novel_splicesite	232	2	27
Mouse	ENSMUSG00000048399	transcript4248.16.nnic	novel_not_in_catalog	at_least_one_novel_splicesite	469	3	27
Mouse	ENSMUSG00000022774	transcript4764.16.nnic	novel_not_in_catalog	at_least_one_novel_splicesite	531	2	27
Mouse	ENSMUSG00000061080	transcript6417.16.nnic	novel_not_in_catalog	at_least_one_novel_splicesite	1032	6	27
Mouse	ENSMUSG00000096948	transcript4865.18.nnic	novel_not_in_catalog	at_least_one_novel_splicesite	649	2	27
Mouse	ENSMUSG00000039678	transcript4652.2.nnic	novel_not_in_catalog	at_least_one_novel_splicesite	660	2	26
Mouse	ENSMUSG00000028459	transcript3201.4.nnic	novel_not_in_catalog	at_least_one_novel_splicesite	1299	2	26
Mouse	ENSMUSG00000028552	transcript8676.4.nnic	novel_not_in_catalog	at_least_one_novel_splicesite	968	7	26
Mouse	ENSMUSG00000107283	transcript2840.5.nnic	novel_not_in_catalog	at_least_one_novel_splicesite	1671	7	26
Mouse	ENSMUSG00000029279	transcript9463.5.nnic	novel_not_in_catalog	at_least_one_novel_splicesite	463	2	26
Mouse	ENSMUSG00000029442	transcript13702.5.nnic	novel_not_in_catalog	at_least_one_novel_splicesite	708	4	26
Mouse	ENSMUSG00000025538	transcript15480.5.nnic	novel_not_in_catalog	at_least_one_novel_splicesite	1260	9	26
Mouse	ENSMUSG00000031575	transcript2784.8.nnic	novel_not_in_catalog	at_least_one_novel_splicesite	322	2	26
Mouse	ENSMUSG00000036990	transcript8746.8.nnic	novel_not_in_catalog	at_least_one_novel_splicesite	1710	3	26
Mouse	ENSMUSG00000035382	transcript5140.9.nnic	novel_not_in_catalog	at_least_one_novel_splicesite	923	4	26
Mouse	ENSMUSG00000034007	transcript6920.9.nnic	novel_not_in_catalog	at_least_one_novel_splicesite	632	4	26
Mouse	ENSMUSG00000032497	transcript17860.9.nnic	novel_not_in_catalog	at_least_one_novel_splicesite	459	2	26
Mouse	ENSMUSG00000018761	transcript11508.11.nnic	novel_not_in_catalog	at_least_one_novel_splicesite	1246	6	26
Mouse	ENSMUSG00000034449	transcript16816.11.nnic	novel_not_in_catalog	at_least_one_novel_splicesite	1238	6	26
Mouse	ENSMUSG00000034664	transcript23122.11.nnic	novel_not_in_catalog	at_least_one_novel_splicesite	503	3	26
Mouse	ENSMUSG00000071551	transcript192.13.nnic	novel_not_in_catalog	at_least_one_novel_splicesite	685	3	26
Mouse	ENSMUSG00000039512	transcript5891.17.nnic	novel_not_in_catalog	at_least_one_novel_splicesite	2214	3	26
Mouse	ENSMUSG00000042532	transcript8971.19.nnic	novel_not_in_catalog	at_least_one_novel_splicesite	607	2	26
Mouse	ENSMUSG00000025076	transcript11037.19.nnic	novel_not_in_catalog	at_least_one_novel_splicesite	810	3	26
Mouse	ENSMUSG00000031399	transcript4524.X.nnic	novel_not_in_catalog	intron_retention	2008	9	26
Mouse	ENSMUSG00000054976	transcript7910.1.nnic	novel_not_in_catalog	at_least_one_novel_splicesite	1292	3	25
Mouse	ENSMUSG00000038495	transcript10335.3.nnic	novel_not_in_catalog	at_least_one_novel_splicesite	282	2	25
Mouse	ENSMUSG00000070733	transcript6543.5.nnic	novel_not_in_catalog	at_least_one_novel_splicesite	1186	2	25
Mouse	ENSMUSG00000010476	transcript27712.7.nnic	novel_not_in_catalog	at_least_one_novel_splicesite	673	5	25
Mouse	ENSMUSG00000031537	transcript1980.8.nnic	novel_not_in_catalog	at_least_one_novel_splicesite	653	3	25
Mouse	ENSMUSG00000091994	transcript7726.10.nnic	novel_not_in_catalog	intron_retention	915	2	25
Mouse	ENSMUSG00000041323	transcript9599.12.nnic	novel_not_in_catalog	at_least_one_novel_splicesite	715	5	25
Mouse	ENSMUSG00000022094	transcript9116.14.nnic	novel_not_in_catalog	at_least_one_novel_splicesite	1160	2	25
Mouse	ENSMUSG00000022822	transcript3152.16.nnic	novel_not_in_catalog	at_least_one_novel_splicesite	1139	7	25
Mouse	ENSMUSG00000034064	transcript6346.16.nnic	novel_not_in_catalog	at_least_one_novel_splicesite	1211	2	25
Mouse	ENSMUSG00000069135	transcript905.17.nnic	novel_not_in_catalog	at_least_one_novel_splicesite	1168	2	25
Mouse	ENSMUSG00000071858	transcript4088.18.nnic	novel_not_in_catalog	at_least_one_novel_splicesite	816	4	25
Mouse	ENSMUSG00000024639	transcript6408.19.nnic	novel_not_in_catalog	at_least_one_novel_splicesite	1146	2	25
Mouse	ENSMUSG00000025935	transcript613.1.nnic	novel_not_in_catalog	at_least_one_novel_splicesite	240	2	24
Mouse	ENSMUSG00000026027	transcript4542.1.nnic	novel_not_in_catalog	at_least_one_novel_splicesite	2195	11	24
Mouse	ENSMUSG00000027612	transcript20929.2.nnic	novel_not_in_catalog	at_least_one_novel_splicesite	765	2	24
Mouse	ENSMUSG00000085037	transcript1728.4.nnic	novel_not_in_catalog	at_least_one_novel_splicesite	792	2	24
Mouse	ENSMUSG00000096974	transcript3135.4.nnic	novel_not_in_catalog	at_least_one_novel_splicesite	531	2	24
Mouse	ENSMUSG00000045973	transcript4128.4.nnic	novel_not_in_catalog	at_least_one_novel_splicesite	1808	2	24
Mouse	ENSMUSG00000028494	transcript6563.4.nnic	novel_not_in_catalog	at_least_one_novel_splicesite	1933	8	24
Mouse	ENSMUSG00000029056	transcript20221.4.nnic	novel_not_in_catalog	at_least_one_novel_splicesite	443	2	24
Mouse	ENSMUSG00000072692	transcript11472.5.nnic	novel_not_in_catalog	at_least_one_novel_splicesite	321	2	24
Mouse	ENSMUSG00000035439	transcript7267.8.nnic	novel_not_in_catalog	at_least_one_novel_splicesite	1198	4	24
Mouse	ENSMUSG00000031662	transcript11336.8.nnic	novel_not_in_catalog	at_least_one_novel_splicesite	472	3	24
Mouse	ENSMUSG00000003348	transcript8960.10.nnic	novel_not_in_catalog	at_least_one_novel_splicesite	540	3	24
Mouse	ENSMUSG00000097061	transcript4561.12.nnic	novel_not_in_catalog	at_least_one_novel_splicesite	872	3	24
Mouse	ENSMUSG00000041765	transcript11568.14.nnic	novel_not_in_catalog	at_least_one_novel_splicesite	965	2	24
Mouse	ENSMUSG00000056612	transcript4014.19.nnic	novel_not_in_catalog	at_least_one_novel_splicesite	830	4	24
Mouse	ENSMUSG00000054057	transcript1657.2.nnic	novel_not_in_catalog	at_least_one_novel_splicesite	408	2	23
Mouse	ENSMUSG00000027287	transcript14966.2.nnic	novel_not_in_catalog	at_least_one_novel_splicesite	618	6	23
Mouse	ENSMUSG00000054582	transcript23213.2.nnic	novel_not_in_catalog	at_least_one_novel_splicesite	664	2	23
Mouse	ENSMUSG00000027940	transcript7829.3.nnic	novel_not_in_catalog	at_least_one_novel_splicesite	1195	8	23
Mouse	ENSMUSG00000054405	transcript14708.4.nnic	novel_not_in_catalog	at_least_one_novel_splicesite	681	8	23
Mouse	ENSMUSG00000029919	transcript5943.6.nnic	novel_not_in_catalog	at_least_one_novel_splicesite	1052	6	23
Mouse	ENSMUSG00000030148	transcript13094.6.nnic	novel_not_in_catalog	at_least_one_novel_splicesite	1327	6	23
Mouse	ENSMUSG00000054320	transcript13110.8.nnic	novel_not_in_catalog	at_least_one_novel_splicesite	1644	5	23
Mouse	ENSMUSG00000010936	transcript14539.8.nnic	novel_not_in_catalog	at_least_one_novel_splicesite	898	3	23
Mouse	ENSMUSG00000066705	transcript4943.9.nnic	novel_not_in_catalog	at_least_one_novel_splicesite	1649	9	23
Mouse	ENSMUSG00000058587	transcript11987.9.nnic	novel_not_in_catalog	at_least_one_novel_splicesite	1056	4	23
Mouse	ENSMUSG00000020899	transcript11121.11.nnic	novel_not_in_catalog	at_least_one_novel_splicesite	1436	2	23
Mouse	ENSMUSG00000085126	transcript30258.11.nnic	novel_not_in_catalog	at_least_one_novel_splicesite	712	3	23
Mouse	ENSMUSG00000056458	transcript10560.12.nnic	novel_not_in_catalog	at_least_one_novel_splicesite	1459	10	23
Mouse	ENSMUSG00000021910	transcript3285.14.nnic	novel_not_in_catalog	at_least_one_novel_splicesite	1174	4	23
Mouse	ENSMUSG00000022214	transcript6580.14.nnic	novel_not_in_catalog	at_least_one_novel_splicesite	1292	5	23
Mouse	ENSMUSG00000022822	transcript3171.16.nnic	novel_not_in_catalog	at_least_one_novel_splicesite	1678	3	23
Mouse	ENSMUSG00000035764	transcript4953.16.nnic	novel_not_in_catalog	at_least_one_novel_splicesite	1322	3	23
Mouse	ENSMUSG00000034681	transcript3055.17.nnic	novel_not_in_catalog	at_least_one_novel_splicesite	1872	8	23
Mouse	ENSMUSG00000073436	transcript3827.17.nnic	novel_not_in_catalog	at_least_one_novel_splicesite	1958	2	23
Mouse	ENSMUSG00000033417	transcript11436.19.nnic	novel_not_in_catalog	at_least_one_novel_splicesite	1105	2	23
Mouse	ENSMUSG00000036959	transcript2510.X.nnic	novel_not_in_catalog	at_least_one_novel_splicesite	627	2	23
Mouse	ENSMUSG00000043384	transcript7620.X.nnic	novel_not_in_catalog	at_least_one_novel_splicesite	1111	5	23
Mouse	ENSMUSG00000026014	transcript4861.1.nnic	novel_not_in_catalog	at_least_one_novel_splicesite	763	2	22
Mouse	ENSMUSG00000056050	transcript19118.1.nnic	novel_not_in_catalog	at_least_one_novel_splicesite	1896	4	22
Mouse	ENSMUSG00000054057	transcript1655.2.nnic	novel_not_in_catalog	at_least_one_novel_splicesite	617	2	22
Mouse	ENSMUSG00000026779	transcript1935.2.nnic	novel_not_in_catalog	at_least_one_novel_splicesite	1836	5	22
Mouse	ENSMUSG00000026960	transcript7757.2.nnic	novel_not_in_catalog	at_least_one_novel_splicesite	1949	4	22
Mouse	ENSMUSG00000074678	transcript19797.2.nnic	novel_not_in_catalog	at_least_one_novel_splicesite	491	3	22
Mouse	ENSMUSG00000027796	transcript3522.3.nnic	novel_not_in_catalog	at_least_one_novel_splicesite	976	2	22
Mouse	ENSMUSG00000073147	transcript1183.5.nnic	novel_not_in_catalog	at_least_one_novel_splicesite	577	3	22
Mouse	ENSMUSG00000085416	transcript532.6.nnic	novel_not_in_catalog	at_least_one_novel_splicesite	446	2	22
Mouse	ENSMUSG00000079477	transcript9485.6.nnic	novel_not_in_catalog	at_least_one_novel_splicesite	779	2	22
Mouse	ENSMUSG00000107730	transcript15822.6.nnic	novel_not_in_catalog	at_least_one_novel_splicesite	543	2	22
Mouse	ENSMUSG00000030423	transcript10749.7.nnic	novel_not_in_catalog	at_least_one_novel_splicesite	1206	6	22
Mouse	ENSMUSG00000030798	transcript13211.7.nnic	novel_not_in_catalog	at_least_one_novel_splicesite	567	3	22
Mouse	ENSMUSG00000070426	transcript20217.7.nnic	novel_not_in_catalog	at_least_one_novel_splicesite	787	2	22
Mouse	ENSMUSG00000032057	transcript6156.9.nnic	novel_not_in_catalog	at_least_one_novel_splicesite	1320	7	22
Mouse	ENSMUSG00000025794	transcript18893.9.nnic	novel_not_in_catalog	at_least_one_novel_splicesite	897	6	22
Mouse	ENSMUSG00000078451	transcript3189.10.nnic	novel_not_in_catalog	at_least_one_novel_splicesite	437	2	22
Mouse	ENSMUSG00000017291	transcript15185.11.nnic	novel_not_in_catalog	at_least_one_novel_splicesite	1250	2	22
Mouse	ENSMUSG00000087407	transcript16875.11.nnic	novel_not_in_catalog	at_least_one_novel_splicesite	506	2	22
Mouse	ENSMUSG00000050538	transcript20224.11.nnic	novel_not_in_catalog	at_least_one_novel_splicesite	1268	3	22
Mouse	ENSMUSG00000045532	transcript23355.11.nnic	novel_not_in_catalog	at_least_one_novel_splicesite	947	2	22
Mouse	ENSMUSG00000025793	transcript28498.11.nnic	novel_not_in_catalog	at_least_one_novel_splicesite	545	6	22
Mouse	ENSMUSG00000020629	transcript1966.12.nnic	novel_not_in_catalog	at_least_one_novel_splicesite	986	4	22
Mouse	ENSMUSG00000091472	transcript263.14.nnic	novel_not_in_catalog	at_least_one_novel_splicesite	562	3	22
Mouse	ENSMUSG00000068101	transcript8990.15.nnic	novel_not_in_catalog	at_least_one_novel_splicesite	841	5	22
Mouse	ENSMUSG00000025738	transcript4832.17.nnic	novel_not_in_catalog	at_least_one_novel_splicesite	1881	2	22
Mouse	ENSMUSG00000096948	transcript4867.18.nnic	novel_not_in_catalog	at_least_one_novel_splicesite	1270	2	22
Mouse	ENSMUSG00000027220	transcript11775.2.nnic	novel_not_in_catalog	at_least_one_novel_splicesite	1507	2	21
Mouse	ENSMUSG00000027984	transcript14439.3.nnic	novel_not_in_catalog	at_least_one_novel_splicesite	1852	9	21
Mouse	ENSMUSG00000087142	transcript3414.4.nnic	novel_not_in_catalog	at_least_one_novel_splicesite	897	3	21
Mouse	ENSMUSG00000028525	transcript7387.4.nnic	novel_not_in_catalog	at_least_one_novel_splicesite	400	2	21
Mouse	ENSMUSG00000029344	transcript10587.5.nnic	novel_not_in_catalog	at_least_one_novel_splicesite	1915	7	21
Mouse	ENSMUSG00000045348	transcript18219.5.nnic	novel_not_in_catalog	at_least_one_novel_splicesite	1053	3	21
Mouse	ENSMUSG00000032827	transcript429.6.nnic	novel_not_in_catalog	intron_retention	1263	5	21
Mouse	ENSMUSG00000030166	transcript12485.6.nnic	novel_not_in_catalog	intron_retention	1279	5	21
Mouse	ENSMUSG00000060962	transcript9475.7.nnic	novel_not_in_catalog	at_least_one_novel_splicesite	991	13	21
Mouse	ENSMUSG00000090336	transcript1168.8.nnic	novel_not_in_catalog	at_least_one_novel_splicesite	852	6	21
Mouse	ENSMUSG00000040006	transcript495.10.nnic	novel_not_in_catalog	at_least_one_novel_splicesite	558	2	21
Mouse	ENSMUSG00000061780	transcript7786.10.nnic	novel_not_in_catalog	at_least_one_novel_splicesite	401	2	21
Mouse	ENSMUSG00000001786	transcript11054.10.nnic	novel_not_in_catalog	at_least_one_novel_splicesite	1365	6	21
Mouse	ENSMUSG00000003119	transcript20279.11.nnic	novel_not_in_catalog	at_least_one_novel_splicesite	1509	3	21
Mouse	ENSMUSG00000050910	transcript25769.11.nnic	novel_not_in_catalog	at_least_one_novel_splicesite	989	2	21
Mouse	ENSMUSG00000114018	transcript1008.12.nnic	novel_not_in_catalog	at_least_one_novel_splicesite	586	3	21
Mouse	ENSMUSG00000047246	transcript1289.13.nnic	novel_not_in_catalog	at_least_one_novel_splicesite	956	3	21
Mouse	ENSMUSG00000021497	transcript5857.13.nnic	novel_not_in_catalog	at_least_one_novel_splicesite	1524	6	21
Mouse	ENSMUSG00000035960	transcript5193.14.nnic	novel_not_in_catalog	at_least_one_novel_splicesite	518	3	21
Mouse	ENSMUSG00000033088	transcript7239.15.nnic	novel_not_in_catalog	at_least_one_novel_splicesite	1023	3	21
Mouse	ENSMUSG00000071266	transcript2276.17.nnic	novel_not_in_catalog	at_least_one_novel_splicesite	901	6	21
Mouse	ENSMUSG00000025427	transcript7197.18.nnic	novel_not_in_catalog	at_least_one_novel_splicesite	380	2	21
Mouse	ENSMUSG00000062590	transcript8320.1.nnic	novel_not_in_catalog	at_least_one_novel_splicesite	917	7	20
Mouse	ENSMUSG00000026429	transcript12555.1.nnic	novel_not_in_catalog	at_least_one_novel_splicesite	967	7	20
Mouse	ENSMUSG00000086454	transcript12717.2.nnic	novel_not_in_catalog	at_least_one_novel_splicesite	1216	4	20
Mouse	ENSMUSG00000048416	transcript4364.3.nnic	novel_not_in_catalog	at_least_one_novel_splicesite	1182	8	20
Mouse	ENSMUSG00000010538	transcript6065.3.nnic	novel_not_in_catalog	at_least_one_novel_splicesite	649	5	20
Mouse	ENSMUSG00000028049	transcript6971.3.nnic	novel_not_in_catalog	at_least_one_novel_splicesite	1550	9	20
Mouse	ENSMUSG00000028455	transcript3098.4.nnic	novel_not_in_catalog	at_least_one_novel_splicesite	389	3	20
Mouse	ENSMUSG00000040532	transcript16459.5.nnic	novel_not_in_catalog	at_least_one_novel_splicesite	617	2	20
Mouse	ENSMUSG00000043541	transcript16751.6.nnic	novel_not_in_catalog	at_least_one_novel_splicesite	782	3	20
Mouse	ENSMUSG00000047884	transcript11076.7.nnic	novel_not_in_catalog	at_least_one_novel_splicesite	1018	3	20
Mouse	ENSMUSG00000032737	transcript19940.7.nnic	novel_not_in_catalog	at_least_one_novel_splicesite	517	3	20
Mouse	ENSMUSG00000096917	transcript4982.8.nnic	novel_not_in_catalog	at_least_one_novel_splicesite	749	4	20
Mouse	ENSMUSG00000086866	transcript5245.8.nnic	novel_not_in_catalog	at_least_one_novel_splicesite	882	2	20
Mouse	ENSMUSG00000032609	transcript16839.9.nnic	novel_not_in_catalog	at_least_one_novel_splicesite	2243	6	20
Mouse	ENSMUSG00000087400	transcript1977.10.nnic	novel_not_in_catalog	at_least_one_novel_splicesite	1114	4	20
Mouse	ENSMUSG00000020272	transcript4262.11.nnic	novel_not_in_catalog	at_least_one_novel_splicesite	621	3	20
Mouse	ENSMUSG00000049755	transcript8062.11.nnic	novel_not_in_catalog	at_least_one_novel_splicesite	510	3	20
Mouse	ENSMUSG00000020910	transcript10229.11.nnic	novel_not_in_catalog	at_least_one_novel_splicesite	702	3	20
Mouse	ENSMUSG00000097165	transcript15176.11.nnic	novel_not_in_catalog	at_least_one_novel_splicesite	1041	2	20
Mouse	ENSMUSG00000038811	transcript19099.11.nnic	novel_not_in_catalog	at_least_one_novel_splicesite	640	4	20
Mouse	ENSMUSG00000004151	transcript2815.12.nnic	novel_not_in_catalog	at_least_one_novel_splicesite	1387	3	20
Mouse	ENSMUSG00000058246	transcript7428.13.nnic	novel_not_in_catalog	at_least_one_novel_splicesite	694	3	20
Mouse	ENSMUSG00000098087	transcript8890.13.nnic	novel_not_in_catalog	at_least_one_novel_splicesite	657	2	20
Mouse	ENSMUSG00000023806	transcript496.17.nnic	novel_not_in_catalog	at_least_one_novel_splicesite	1908	9	20
Mouse	ENSMUSG00000053347	transcript2227.17.nnic	novel_not_in_catalog	at_least_one_novel_splicesite	1340	4	20
Mouse	ENSMUSG00000073413	transcript9802.17.nnic	novel_not_in_catalog	at_least_one_novel_splicesite	758	3	20
Mouse	ENSMUSG00000024256	transcript18788.17.nnic	novel_not_in_catalog	at_least_one_novel_splicesite	457	2	20
Mouse	ENSMUSG00000024534	transcript4655.18.nnic	novel_not_in_catalog	at_least_one_novel_splicesite	873	4	20
Mouse	ENSMUSG00000024639	transcript6412.19.nnic	novel_not_in_catalog	at_least_one_novel_splicesite	2081	2	20
Mouse	ENSMUSG00000034432	transcript9129.1.nnic	novel_not_in_catalog	at_least_one_novel_splicesite	864	4	19
Mouse	ENSMUSG00000026644	transcript24.2.nnic	novel_not_in_catalog	at_least_one_novel_splicesite	801	4	19
Mouse	ENSMUSG00000027012	transcript9049.2.nnic	novel_not_in_catalog	at_least_one_novel_splicesite	316	3	19
Mouse	ENSMUSG00000066152	transcript5386.4.nnic	novel_not_in_catalog	at_least_one_novel_splicesite	831	4	19
Mouse	ENSMUSG00000045302	transcript2669.5.nnic	novel_not_in_catalog	at_least_one_novel_splicesite	671	2	19
Mouse	ENSMUSG00000029477	transcript13519.5.nnic	novel_not_in_catalog	at_least_one_novel_splicesite	1179	7	19
Mouse	ENSMUSG00000054556	transcript1174.6.nnic	novel_not_in_catalog	at_least_one_novel_splicesite	579	2	19
Mouse	ENSMUSG00000045896	transcript8214.6.nnic	novel_not_in_catalog	at_least_one_novel_splicesite	705	5	19
Mouse	ENSMUSG00000045100	transcript10228.6.nnic	novel_not_in_catalog	at_least_one_novel_splicesite	590	4	19
Mouse	ENSMUSG00000109143	transcript6642.7.nnic	novel_not_in_catalog	at_least_one_novel_splicesite	303	3	19
Mouse	ENSMUSG00000074415	transcript3976.9.nnic	novel_not_in_catalog	at_least_one_novel_splicesite	373	2	19
Mouse	ENSMUSG00000032278	transcript8531.9.nnic	novel_not_in_catalog	at_least_one_novel_splicesite	629	4	19
Mouse	ENSMUSG00000020272	transcript4275.11.nnic	novel_not_in_catalog	at_least_one_novel_splicesite	508	2	19
Mouse	ENSMUSG00000020492	transcript17376.11.nnic	novel_not_in_catalog	at_least_one_novel_splicesite	1311	5	19
Mouse	ENSMUSG00000020919	transcript21918.11.nnic	novel_not_in_catalog	at_least_one_novel_splicesite	782	6	19
Mouse	ENSMUSG00000018412	transcript23738.11.nnic	novel_not_in_catalog	at_least_one_novel_splicesite	1055	2	19
Mouse	ENSMUSG00000009210	transcript24350.11.nnic	novel_not_in_catalog	intron_retention	931	5	19
Mouse	ENSMUSG00000113010	transcript3784.13.nnic	novel_not_in_catalog	at_least_one_novel_splicesite	551	2	19
Mouse	ENSMUSG00000021692	transcript11069.13.nnic	novel_not_in_catalog	at_least_one_novel_splicesite	1494	12	19
Mouse	ENSMUSG00000063458	transcript2083.14.nnic	novel_not_in_catalog	at_least_one_novel_splicesite	321	2	19
Mouse	ENSMUSG00000057409	transcript2064.17.nnic	novel_not_in_catalog	at_least_one_novel_splicesite	841	5	19
Mouse	ENSMUSG00000090509	transcript10252.17.nnic	novel_not_in_catalog	at_least_one_novel_splicesite	575	3	19
Mouse	ENSMUSG00000085492	transcript16688.17.nnic	novel_not_in_catalog	at_least_one_novel_splicesite	1186	4	19
Mouse	ENSMUSG00000095438	transcript612.18.nnic	novel_not_in_catalog	at_least_one_novel_splicesite	735	3	19
Mouse	ENSMUSG00000024664	transcript5665.19.nnic	novel_not_in_catalog	at_least_one_novel_splicesite	1738	13	19
Mouse	ENSMUSG00000026223	transcript8210.1.nnic	novel_not_in_catalog	at_least_one_novel_splicesite	730	3	18
Mouse	ENSMUSG00000009633	transcript19984.1.nnic	novel_not_in_catalog	at_least_one_novel_splicesite	152	2	18
Mouse	ENSMUSG00000026918	transcript3938.2.nnic	novel_not_in_catalog	intron_retention	919	2	18
Mouse	ENSMUSG00000035949	transcript6290.2.nnic	novel_not_in_catalog	at_least_one_novel_splicesite	1303	2	18
Mouse	ENSMUSG00000086328	transcript13985.2.nnic	novel_not_in_catalog	at_least_one_novel_splicesite	790	2	18
Mouse	ENSMUSG00000017299	transcript23417.2.nnic	novel_not_in_catalog	at_least_one_novel_splicesite	998	11	18
Mouse	ENSMUSG00000028018	transcript14685.3.nnic	novel_not_in_catalog	at_least_one_novel_splicesite	842	2	18
Mouse	ENSMUSG00000029126	transcript4469.5.nnic	novel_not_in_catalog	at_least_one_novel_splicesite	902	6	18
Mouse	ENSMUSG00000029701	transcript1669.6.nnic	novel_not_in_catalog	at_least_one_novel_splicesite	1074	8	18
Mouse	ENSMUSG00000040525	transcript4771.7.nnic	novel_not_in_catalog	at_least_one_novel_splicesite	562	6	18
Mouse	ENSMUSG00000031502	transcript665.8.nnic	novel_not_in_catalog	at_least_one_novel_splicesite	1240	2	18
Mouse	ENSMUSG00000110580	transcript9456.8.nnic	novel_not_in_catalog	at_least_one_novel_splicesite	738	3	18
Mouse	ENSMUSG00000003848	transcript14236.8.nnic	novel_not_in_catalog	at_least_one_novel_splicesite	732	2	18
Mouse	ENSMUSG00000110862	transcript4024.9.nnic	novel_not_in_catalog	at_least_one_novel_splicesite	576	3	18
Mouse	ENSMUSG00000086158	transcript11761.9.nnic	novel_not_in_catalog	at_least_one_novel_splicesite	1239	3	18
Mouse	ENSMUSG00000020092	transcript4707.10.nnic	novel_not_in_catalog	at_least_one_novel_splicesite	1515	2	18
Mouse	ENSMUSG00000019936	transcript12641.10.nnic	novel_not_in_catalog	at_least_one_novel_splicesite	2026	7	18
Mouse	ENSMUSG00000018919	transcript12925.11.nnic	novel_not_in_catalog	at_least_one_novel_splicesite	759	4	18
Mouse	ENSMUSG00000018697	transcript16730.11.nnic	novel_not_in_catalog	at_least_one_novel_splicesite	2021	14	18
Mouse	ENSMUSG00000058756	transcript20548.11.nnic	novel_not_in_catalog	at_least_one_novel_splicesite	808	2	18
Mouse	ENSMUSG00000078640	transcript23098.11.nnic	novel_not_in_catalog	at_least_one_novel_splicesite	1024	4	18
Mouse	ENSMUSG00000039670	transcript28662.11.nnic	novel_not_in_catalog	at_least_one_novel_splicesite	903	2	18
Mouse	ENSMUSG00000001497	transcript3931.12.nnic	novel_not_in_catalog	at_least_one_novel_splicesite	731	2	18
Mouse	ENSMUSG00000035560	transcript4332.12.nnic	novel_not_in_catalog	at_least_one_novel_splicesite	576	3	18
Mouse	ENSMUSG00000021221	transcript7094.12.nnic	novel_not_in_catalog	at_least_one_novel_splicesite	1380	2	18
Mouse	ENSMUSG00000044715	transcript9621.12.nnic	novel_not_in_catalog	at_least_one_novel_splicesite	1407	2	18
Mouse	ENSMUSG00000047992	transcript7769.18.nnic	novel_not_in_catalog	at_least_one_novel_splicesite	1657	4	18
Mouse	ENSMUSG00000036782	transcript1650.X.nnic	novel_not_in_catalog	at_least_one_novel_splicesite	1149	2	18
Mouse	ENSMUSG00000026365	transcript13593.1.nnic	novel_not_in_catalog	at_least_one_novel_splicesite	1207	6	17
Mouse	ENSMUSG00000026655	transcript131.2.nnic	novel_not_in_catalog	at_least_one_novel_splicesite	1035	4	17
Mouse	ENSMUSG00000032046	transcript19261.2.nnic	novel_not_in_catalog	at_least_one_novel_splicesite	692	2	17
Mouse	ENSMUSG00000074579	transcript4266.3.nnic	novel_not_in_catalog	at_least_one_novel_splicesite	678	4	17
Mouse	ENSMUSG00000028158	transcript15273.3.nnic	novel_not_in_catalog	at_least_one_novel_splicesite	793	4	17
Mouse	ENSMUSG00000028573	transcript6940.4.nnic	novel_not_in_catalog	at_least_one_novel_splicesite	355	3	17
Mouse	ENSMUSG00000085399	transcript8988.4.nnic	novel_not_in_catalog	at_least_one_novel_splicesite	1942	3	17
Mouse	ENSMUSG00000029575	transcript11268.5.nnic	novel_not_in_catalog	at_least_one_novel_splicesite	838	9	17
Mouse	ENSMUSG00000061882	transcript14109.5.nnic	novel_not_in_catalog	at_least_one_novel_splicesite	1611	6	17
Mouse	ENSMUSG00000089889	transcript19745.5.nnic	novel_not_in_catalog	at_least_one_novel_splicesite	929	3	17
Mouse	ENSMUSG00000030347	transcript14976.6.nnic	novel_not_in_catalog	at_least_one_novel_splicesite	1016	3	17
Mouse	ENSMUSG00000107730	transcript15820.6.nnic	novel_not_in_catalog	at_least_one_novel_splicesite	538	2	17
Mouse	ENSMUSG00000038244	transcript22651.7.nnic	novel_not_in_catalog	at_least_one_novel_splicesite	657	4	17
Mouse	ENSMUSG00000108511	transcript24064.7.nnic	novel_not_in_catalog	at_least_one_novel_splicesite	1003	2	17
Mouse	ENSMUSG00000030685	transcript25610.7.nnic	novel_not_in_catalog	at_least_one_novel_splicesite	777	2	17
Mouse	ENSMUSG00000035151	transcript8997.8.nnic	novel_not_in_catalog	at_least_one_novel_splicesite	756	4	17
Mouse	ENSMUSG00000097535	transcript1559.9.nnic	novel_not_in_catalog	at_least_one_novel_splicesite	2377	2	17
Mouse	ENSMUSG00000111837	transcript19307.9.nnic	novel_not_in_catalog	at_least_one_novel_splicesite	667	2	17
Mouse	ENSMUSG00000039697	transcript2354.10.nnic	novel_not_in_catalog	at_least_one_novel_splicesite	369	3	17
Mouse	ENSMUSG00000019917	transcript4290.10.nnic	novel_not_in_catalog	at_least_one_novel_splicesite	253	2	17
Mouse	ENSMUSG00000020397	transcript5258.11.nnic	novel_not_in_catalog	at_least_one_novel_splicesite	1289	3	17
Mouse	ENSMUSG00000072553	transcript17884.11.nnic	novel_not_in_catalog	at_least_one_novel_splicesite	842	4	17
Mouse	ENSMUSG00000087184	transcript24746.11.nnic	novel_not_in_catalog	at_least_one_novel_splicesite	1590	2	17
Mouse	ENSMUSG00000020775	transcript26926.11.nnic	novel_not_in_catalog	at_least_one_novel_splicesite	468	3	17
Mouse	ENSMUSG00000025169	transcript30100.11.nnic	novel_not_in_catalog	at_least_one_novel_splicesite	621	3	17
Mouse	ENSMUSG00000020598	transcript2976.12.nnic	novel_not_in_catalog	at_least_one_novel_splicesite	1206	3	17
Mouse	ENSMUSG00000113099	transcript5665.12.nnic	novel_not_in_catalog	at_least_one_novel_splicesite	1018	2	17
Mouse	ENSMUSG00000015002	transcript4169.15.nnic	novel_not_in_catalog	at_least_one_novel_splicesite	783	2	17
[truncated: 10,872 more rows]

## Sheet: Supplementary Data 7
Supplementary Data 6. List of Intron Retention (IR) Isoforms in Mouse and Grafted Samples, related to Fig. 3.
[truncated: 1,678 more rows]

[truncated: 3 more sheets: Supplementary Data 8, Supplementary Data 9, Supplementary Data 10]
